# Supplementary material for: Contribution to a reference library of DNA barcodes of Colombian freshwater fishes
Source: Biodivers Data J. 2022 Jan 6;10:e65981. doi: 10.3897/BDJ.10.e65981 (PMC8758633; doi:10.3897/BDJ.10.e65981)
Supplement: Supplementary material 3 — Barcoding CIUA01 Library [file bdj-10-e65981-s003.fasta]

>5078A_5078|Trichomycterus.chapmani|COI-5P
CCTCTACCCTTKGTTTGGTGCTTGAGCCGGTATAGTTGGTACCGCCCTTAGCTTGTTAATTCGAGCAGAGTTAAGCCAAC
CCGGAGCCTTGCTAGGCGACGACCAAATTTATAATGTTATTGTTACCGCACACGCCTTCGTAATAATTTTCTTTATAGTA
ATACCAATTATGATTGGAGGCTTCGGAAACTGACTAGTCCCTCTTATGATTGGAGCACCTGATATGGCATTCCCACGAAT
AAATAACATAAGCTTTTGACTTCTTCCCCCATCCTTTCTTCTACTGCTCGCCTCTTCTGGAGTAGAAGCAGGAGCAGGAA
CCGGATGAACCGTTTACCCTCCTCTTGCCGGTAATCTTGCCCACGCGGGAGCCTCTGTTGATTTAACCATCTTCTCCCTC
CACCTAGCCGGTGTTTCTTCAATCTTGGGGGCTATTAATTTTATTACAACAATTATTAACATAAAACCCCCAGCTATTTC
ACAGTATCAAACACCATTATTTGTCTGATCAGTCCTAATTACAGCCGTCCTCCTTCTGCTATCCCTTCCTGTTTTAGCTG
CAGGAATTACAATGCTTTTAACTGATCGTAACCTAAACACCACATTCTTTGACCCGGCAGGCGGAGGAGACCCAATTCTA
TATCAACACTT
>5078B_5078|Trichomycterus.chapmani|COI-5P
TTGTTAATTCGAGCAGAGTTAAGCCAACCCGGAGCCTTGCTAGGCGACGACCAAATTTATAATGTTATTGTTACCGCACA
CGCCTTCGTAATAATTTTCTTTATAGTAATACCAATTATGATTGGAGGCTTCGGAAACTGACTAGTCCCTCTTATGATTG
GAGCACCTGATATGGCATTCCCACGAATAAATAACATAAGCTTTTGACTTCTTCCCCCATCCTTTCTTCTACTGCTCGCC
TCTTCTGGAGTAGAAGCAGGAGCAGGAACCGGATGAACCGTTTACCCTCCTCTTGCCGGTAATCTTGCCCACGCGGGAGC
CTCTGTTGATTTAACCATCTTCTCCCTCCACCTAGCCGGTGTTTCTTCAATCTTGGGGGCTATTAATTTTATTACAACAA
TTATTAACATAAAACCCCCAGCTATTTCACAGTATCAAACACCATTATTTGTCTGATCAGTCCTAATTACAGCCGTCCTC
CTTCTGCTATCCCTTCCTGTTTT-AGCTGCAGGAATTACAATGCTTTTAACTGATCGTAACCTAAACACCACATTCTTTG
ACCCGGCAGGCGGAGGAGAC
>9032_5060|Astroblepus.sp|COI-5P
TTGTTAATTCGAGCAGAGTTAAGCCAACCCGGAGCCTTGCTAGGCGACGACCAAATTTATAATGTTATTGTTACCGCACA
CGCCTTCGTAATAATTTTCTTTATAGTAATACCAATTATGATTGGAGGCTTCGGAAACTGACTAGTCCCTCTTATGATTG
GAGCACCTGATATGGCATTCCCACGAATAAATAACATAAGCTTTTGACTTCTTCCCCCATCCTTTCTTCTACTGCTCGCC
TCTTCTGGAGTAGAAGCAGGAGCAGGAACCGGATGAACCGTTTACCCTCCTCTTGCCGGTAATCTTGCCCACGCGGGAGC
CTCTGTTGATTTAACCATCTTCTCCCTCCACCTAGCCGGTGTTTCTTCAATCTTGGGGGCTATTAATTTTATTACAACAA
TTATTAACATAAAACCCCCAGCTATTTCACAGTATCAAACACCATTATTTGTCTGATCAGTCCTAATTACAGCCGTCCTC
CTTCTGCTATCCCTTCCTGTTTT-AGCTGCAGGAATTACAATGCTTTTAACTGATCGTAACCTAAACACCACATTCTTTG
ACCCGGCAGGCGGAGGAGAC
>5431A_5431|Trichomycterus.sp|COI-5P
CTACCTTGTGTTTGGTGCTTGAGCCGGTATAGTTGGTACCGCCCTTAGCTTGTTAATTCGAGCAGAGTTAAGCCAACCCG
GAGCCTTGCTAGGCGACGACCAAATTTATAATGTTATTGTTACCGCACACGCCTTCGTAATAATTTTCTTTATAGTAATA
CCAATTATGATTGGAGGCTTCGGAAACTGACTAGTCCCTCTTATGATTGGAGCACCTGATATGGCATTCCCACGAATAAA
TAACATAAGCTTTTGACTTCTTCCCCCATCCTTTCTTCTACTGCTCGCCTCTTCTGGAGTAGAAGCAGGAGCAGGGACCG
GATGAACCGTTTACCCTCCTCTTGCCGGTAATCTTGCCCACGCGGGAGCCTCTGTTGATTTAACCATCTTCTCCCTCCAC
CTAGCCGGTGTTTCTTCAATCTTGGGGGCTATTAATTTTATTACAACAATTATTAACATAAAACCCCCAGCTATTTCACA
GTATCAAACACCATTATTTGTCTGATCAGTCCTAATTACAGCCGTCCTCCTTCTGCTATCCCTTCCTGTTTTAGCTGCAG
GAATTACAATGCTTTTAACCGATCGTAACCTAAACACCACATTCTTTGACCCGGCAGGCGGAGGAGACCCAATTCTATAT
CAACACTTGTTC
>5444A_5444|Trichomycterus.sp|COI-5P
TTGTTAATTCGAGCAGAGTTAAGCCAACCCGGAGCCTTGCTAGGCGACGACCAAATTTATAATGTTATTGTTACCGCACA
CGCCTTCGTAATAATTTTCTTTATAGTAATACCAATTATGATTGGAGGCTTCGGAAACTGACTAGTCCCTCTTATGATTG
GAGCACCTGATATGGCATTCCCACGAATAAATAACATAAGCTTTTGACTTCTTCCCCCATCCTTTCTTCTACTGCTCGCC
TCTTCTGGAGTAGAAGCAGGAGCAGGAACCGGATGAACCGTTTACCCTCCTCTTGCCGGTAATCTTGCCCACGCGGGAGC
CTCTGTTGATTTAACCATCTTCTCCCTCCACCTAGCCGGTGTTTCTTCAATCTTGGGGGCTATTAATTTTATTACAACAA
TTATTAACATAAAACCCCCAGCTATTTCACAGTATCAAACACCATTATTTGTCTGATCAGTCCTAATTACAGCCGTCCTC
CTTCTGCTATCCCTTCCTGTTTT-AGCTGCAGGAATTACAATGCTTTTAACTGATCGTAACCTAAACACCACATTCTTTG
ACCCGGCAGGCGGAGGAGAC
>8385_3948|Trichomycterus.chapmani|COI-5P
CCTCTACCTTGTGTTTGGTGCTTGAGCCGGTATAGTTGGTACCGCCCTTAGCTTGTTAATTCGAGCAGAGTTAAGCCAAC
CCGGAGCCTTGCTAGGCGACGACCAAATTTATAATGTTATTGTTACCGCACACGCCTTCGTAATAATTTTCTTTATAGTA
ATACCAATTATGATTGGAGGCTTCGGAAACTGACTAGTCCCTCTTATGATTGGAGCACCTGATATGGCATTCCCACGAAT
AAATAACATAAGCTTTTGACTTCTTCCCCCATCCTTTCTTCTACTGCTCGCCTCTTCTGGAGTAGAAGCAGGAGCAGGAA
CCGGATGAACCGTTTACCCTCCTCTTGCCGGTAATCTTGCCCACGCGGGAGCCTCTGTTGATTTAACCATCTTCTCCCTC
CACCTAGCCGGTGTTTCTTCAATCTTGGGGGCTATTAATTTTATTACAACAATTATTAACATAAAACCCCCAGCTATTTC
ACAGTATCAAACACCATTATTTGTCTGATCAGTCCTAATTACAGCCGTCCTCCTTCTGCTATCCCTTCCTGTTTTAGCTG
CAGGAATTACAATGCTTTTAACTGATCGTAACCTAAACACCACATTCTTTGACCCGGCAGGCGGAGGAGACCCAATTCTA
TATCAACACT
>8386_3948|Trichomycterus.chapmani|COI-5P
TTGTTAATTCGAGCAGAGTTAAGCCAACCCGGAGCCTTGCTAGGCGACGACCAAATTTATAATGTTATTGTTACCGCACA
CGCCTTCGTAATAATTTTCTTTATAGTAATACCAATTATGATTGGAGGCTTCGGAAACTGACTAGTCCCTCTTATGATTG
GAGCACCTGATATGGCATTCCCACGAATAAATAACATAAGCTTTTGACTTCTTCCCCCATCCTTTCTTCTACTGCTCGCC
TCTTCTGGAGTAGAAGCAGGAGCAGGAACCGGATGAACCGTTTACCCTCCTCTTGCCGGTAATCTTGCCCACGCGGGAGC
CTCTGTTGATTTAACCATCTTCTCCCTCCACCTAGCCGGTGTTTCTTCAATCTTGGGGGCTATTAATTTTATTACAACAA
TTATTAACATAAAACCCCCAGCTATTTCACAGTATCAAACACCATTATTTGTCTGATCAGTCCTAATTACAGCCGTCCTC
CTTCTGCTATCCCTTCCTGTTTT-AGCTGCAGGAATTACAATGCTTTTAACTGATCGTAACCTAAACACCACATTCTTTG
ACCCGGCAGGCGGAGGAGAC
>8371_3942|Trichomycterus.chapmani|COI-5P
TTGTTAATTCGAGCAGAGTTAAGCCAACCCGGAGCCTTGCTAGGCGACGACCAAATTTATAATGTTATTGTTACCGCACA
CGCCTTCGTAATAATTTTCTTTATAGTAATACCAATTATGATTGGAGGCTTCGGAAACTGACTAGTCCCTCTTATGATTG
GAGCACCTGATATGGCATTCCCACGAATAAATAACATAAGCTTTTGACTTCTTCCCCCATCCTTTCTTCTACTGCTCGCC
TCTTCTGGAGTAGAAGCAGGAGCAGGAACCGGATGAACCGTTTACCCTCCTCTTGCCGGTAATCTTGCCCACGCGGGAGC
CTCTGTTGATTTAACCATCTTCTCCCTCCACCTAGCCGGTGTTTCTTCAATCTTGGGGGCTATTAATTTTATTACAACAA
TTATTAACATAAAACCCCCAGCTATTTCACAGTATCAAACACCATTATTTGTCTGATCAGTCCTAATTACAGCCGTCCTC
CTTCTGCTATCCCTTCCTGTTTT-AGCTGCAGGAATTACAATGCTTTTAACTGATCGTAACCTAAACACCACATTCTTTG
ACCCGGCAGGCGGAGGAGAC
>8573_3936|Trichomycterus.caliensis|COI-5P
TACCTTNTGTTTGGTGCTTGAGCCGGTATAGTTGGTACCGCCCTTAGCTTGTTAATTCGAGCAGAGTTAAGCCAACCCGG
AGCCTTGCTAGGCGACGACCAAATTTATAATGTTATTGTTACCGCACACGCCTTCGTAATAATTTTCTTTATAGTAATAC
CAATTATGATTGGAGGCTTCGGAAACTGACTAGTCCCTCTTATGATTGGAGCACCTGATATGGCATTCCCACGAATAAAT
AACATAAGCTTTTGACTTCTTCCCCCATCCTTTCTTCTACTGCTCGCCTCTTCTGGAGTAGAAGCAGGAGCAGGAACCGG
ATGAACCGTTTACCCTCCTCTTGCCGGTAATCTTGCCCACGCGGGAGCCTCTGTTGATTTAACCATCTTCTCCCTCCACC
TAGCCGGTGTTTCTTCAATCTTGGGGGCTATTAATTTTATTACAACAATTATTAACATAAAACCCCCAGCTATTTCACAG
TATCAAACACCATTATTTGTCTGATCAGTCCTAATTACAGCCGTCCTCCTTCTGCTATCCCTTCCTGTTTTAGCTGCAGG
AATTACAATGCTTTTAACTGATCGTAACCTAAACACCACATTCTTTGACCCGGCAGGCGGAGGAGACCCAATTCTATATC
AACACT
>8400_3966|Trichomycterus.chapmani|COI-5P
TGGTGCTTGAGCCGGTATAGTTGGTACCGCCCTTAGCTTGTTAATTCGAGCAGAGTTAAGCCAACCCGGAGCCTTGCTAG
GCGACGACCAAATTTATAATGTTATTGTTACCGCACACGCCTTCGTAATAATTTTCTTTATAGTAATACCAATTATGATT
GGAGGCTTCGGAAACTGACTAGTCCCTCTTATGATTGGAGCACCTGATATGGCATTCCCACGAATAAATAACATAAGCTT
TTGACTTCTTCCCCCATCCTTTCTTCTACTGCTCGCCTCTTCTGGAGTAGAAGCAGGAGCAGGAACCGGATGAACCGTTT
ACCCTCCTCTTGCCGGTAATCTTGCCCACGCGGGAGCCTCTGTTGATTTAACCATCTTCTCCCTCCACCTAGCCGGTGTT
TCTTCAATCTTGGGGGCTATTAATTTTATTACAACAATTATTAACATAAAACCCCCAGCTATTTCACAGTATCAAACACC
ATTATTTGTCTGATCAGTCCTAATTACAGCCGTCCTCCTTCTGCTATCCCTTCCTGTTTTAGCTGCAGGAATTACAATGC
TTTTAACTGATCGTAACCTAAACACCACATTCTTTGACCCGGCAGGCGGAGGAGACCCAATTCTATATCAACACT
>8401_3966|Trichomycterus.chapmani|COI-5P
TGGTGCTTGAGCCGGTATAGTTGGTACCGCCCTTAGCTTGTTAATTCGAGCAGAGTTAAGCCAACCCGGAGCCTTGCTAG
GCGACGACCAAATTTATAATGTTATTGTTACCGCACACGCCTTCGTAATAATTTTCTTTATAGTAATACCAATTATGATT
GGAGGCTTCGGAAACTGACTAGTCCCTCTTATGATTGGAGCACCTGATATGGCATTCCCACGAATAAATAACATAAGCTT
TTGACTTCTTCCCCCATCCTTTCTTCTACTGCTCGCCTCTTCTGGAGTAGAAGCAGGAGCAGGAACCGGATGAACCGTTT
ACCCTCCTCTTGCCGGTAATCTTGCCCACGCGGGAGCCTCTGTTGATTTAACCATCTTCTCCCTCCACCTAGCCGGTGTT
TCTTCAATCTTGGGGGCTATTAATTTTATTACAACAATTATTAACATAAAACCCCCAGCTATTTCACAGTATCAAACACC
ATTATTTGTCTGATCAGTCCTAATTACAGCCGTCCTCCTTCTGCTATCCCTTCCTGTTTTAGCTGCAGGAATTACAATGC
TTTTAACTGATCGTAACCTAAACACCACATTCTTTGACCCGGCAGGCGGAGGAGACCCAATTCTATATCAACACTTGTTC
>8488_3946|Trichomycterus.caliensis|COI-5P
CTNTACCTTGTGTTTGGTGCTTGAGCCGGTATAGTTGGTACCGCCCTTAGCTTGTTAATTCGAGCAGAGTTAAGCCAACC
CGGAGCCTTGCTAGGCGACGACCAAATTTATAATGTTATTGTTACCGCACACGCCTTCGTAATAATTTTCTTTATAGTAA
TACCAATTATGATTGGAGGCTTCGGAAACTGACTAGTCCCTCTTATGATTGGAGCACCTGATATGGCATTCCCACGAATA
AATAACATAAGCTTTTGACTTCTTCCCCCATCCTTTCTTCTACTGCTCGCCTCTTCTGGAGTAGAAGCAGGAGCAGGAAC
CGGATGAACCGTTTACCCTCCTCTTGCCGGTAATCTTGCCCACGCGGGAGCCTCTGTTGATTTAACCATCTTCTCCCTCC
ACCTAGCCGGTGTTTCTTCAATCTTGGGGGCTATTAATTTTATTACAACAATTATTAACATAAAACCCCCAGCTATTTCA
CAGTATCAAACACCATTATTTGTCTGATCAGTCCTAATTACAGCCGTCCTCCTTCTGCTATCCCTTCCTGTTTTAGCTGC
AGGAATTACAATGCTTTTAACTGATCGTAACCTAAACACCACATTCTTTGACCCGGCAGGCGGAGGAGACCCAATTCTAT
ATCAACACTTC
>8448_3999|Trichomycterus.caliensis|COI-5P
TTGTTAATTCGAGCAGAGTTAAGCCAACCCGGAGCCTTGCTAGGCGACGACCAAATTTATAATGTTATTGTTACCGCACA
CGCCTTCGTAATAATTTTCTTTATAGTAATACCAATTATGATTGGAGGCTTCGGAAACTGACTAGTCCCTCTTATGATTG
GAGCACCTGATATGGCATTCCCACGAATAAATAACATAAGCTTTTGACTTCTTCCCCCATCCTTTCTTCTACTGCTCGCC
TCTTCTGGAGTAGAAGCAGGAGCAGGAACCGGATGAACCGTTTACCCTCCTCTTGCCGGTAATCTTGCCCACGCGGGAGC
CTCTGTTGATTTAACCATCTTCTCCCTCCACCTAGCCGGTGTTTCTTCAATCTTGGGGGCTATTAATTTTATTACAACAA
TTATTAACATAAAACCCCCAGCTATTTCACAGTATCAAACACCATTATTTGTCTGATCAGTCCTAATTACAGCCGTCCTC
CTTCTGCTATCCCTTCCTGTTTT-AGCTGCAGGAATTACAATGCTTTTAACTGATCGTAACCTAAACACCACATTCTTTG
ACCCGGCAGGCGGAGGAGAC
>8450_3995|Trichomycterus.chapmani|COI-5P
TTGTTAATTCGAGCAGAGTTAAGCCAACCCGGAGCCTTGCTAGGCGACGACCAAATTTATAATGTTATTGTTACCGCACA
CGCCTTCGTAATAATTTTCTTTATAGTAATACCAATTATGATTGGAGGCTTCGGAAACTGACTAGTCCCTCTTATGATTG
GAGCACCTGATATGGCATTCCCACGAATAAATAACATAAGCTTTTGACTTCTTCCCCCATCCTTTCTTCTACTGCTCGCC
TCTTCTGGAGTAGAAGCAGGAGCAGGAACCGGATGAACCGTTTACCCTCCTCTTGCCGGTAATCTTGCCCACGCGGGAGC
CTCTGTTGATTTAACCATCTTCTCCCTCCACCTAGCCGGTGTTTCTTCAATCTTGGGGGCTATTAATTTTATTACAACAA
TTATTAACATAAAACCCCCAGCTATTTCACAGTATCAAACACCATTATTTGTCTGATCAGTCCTAATTACAGCCGTCCTC
CTTCTGCTATCCCTTCCTGTTTT-AGCTGCAGGAATTACAATGCTTTTAACTGATCGTAACCTAAACACCACATTCTTTG
ACCCGGCAGGCGGAGGAGAC
>8451_3995|Trichomycterus.chapmani|COI-5P
TTGTTAATTCGAGCAGAGTTAAGCCAACCCGGAGCCTTGCTAGGCGACGACCAAATTTATAATGTTATTGTTACCGCACA
CGCCTTCGTAATAATTTTCTTTATAGTAATACCAATTATGATTGGAGGCTTCGGAAACTGACTAGTCCCTCTTATGATTG
GAGCACCTGATATGGCATTCCCACGAATAAATAACATAAGCTTTTGACTTCTTCCCCCATCCTTTCTTCTACTGCTCGCC
TCTTCTGGAGTAGAAGCAGGAGCAGGAACCGGATGAACCGTTTACCCTCCTCTTGCCGGTAATCTTGCCCACGCGGGAGC
CTCTGTTGATTTAACCATCTTCTCCCTCCACCTAGCCGGTGTTTCTTCAATCTTGGGGGCTATTAATTTTATTACAACAA
TTATTAACATAAAACCCCCAGCTATTTCACAGTATCAAACACCATTATTTGTCTGATCAGTCCTAATTACAGCCGTCCTC
CTTCTGCTATCCCTTCCTGTTTT-AGCTGCAGGAATTACAATGCTTTTAACTGATCGTAACCTAAACACCACATTCTTTG
ACCCGGCAGGCGGAGGAGAC
>8125_3492|Trichomycterus.sp|COI-5P
TTGTTAATTCGAGCAGAGTTAAGCCAACCCGGAGCCTTGCTAGGCGACGACCAAATTTATAATGTTATTGTTACCGCACA
CGCCTTCGTAATAATTTTCTTTATAGTAATACCAATTATGATTGGAGGCTTCGGAAACTGACTAGTCCCTCTTATGATTG
GAGCACCTGATATGGCATTCCCACGAATAAATAACATAAGCTTTTGACTTCTTCCCCCATCCTTTCTTCTACTGCTCGCC
TCTTCTGGAGTAGAAGCAGGAGCAGGAACCGGATGAACCGTTTACCCTCCTCTTGCCGGTAATCTTGCCCACGCGGGAGC
CTCTGTTGATTTAACCATCTTCTCCCTCCACCTAGCCGGTGTTTCTTCAATCTTGGGGGCTATTAATTTTATTACAACAA
TTATTAACATAAAACCCCCAGCTATTTCACAGTATCAAACACCATTATTTGTCTGATCAGTCCTAATTACAGCCGTCCTC
CTTCTGCTATCCCTTCCTGTTTT-AGCTGCAGGAATTACAATGCTTTTAACTGATCGTAACCTAAACACCACATTCTTTG
ACCCGGCAGGCGGAGGAGAC
>7668_2955|Trichomycterus.striatus|COI-5P
TTGTTAATTCGAGCAGAGTTAAGCCAACCCGGAGCCTTGCTAGGCGACGACCAAATTTATAATGTTATTGTTACCGCACA
CGCCTTCGTAATAATTTTCTTTATAGTAATACCAATTATGATTGGAGGCTTCGGAAACTGACTAGTCCCTCTTATGATTG
GAGCACCTGATATGGCATTCCCACGAATAAATAACATAAGCTTTTGACTTCTTCCCCCATCCTTTCTTCTACTGCTCGCC
TCTTCTGGAGTAGAAGCAGGAGCAGGAACCGGATGAACCGTTTACCCTCCTCTTGCCGGTAATCTTGCCCACGCGGGAGC
CTCTGTTGATTTAACCATCTTCTCCCTCCACCTAGCCGGTGTTTCTTCAATCTTGGGGGCTATTAATTTTATTACAACAA
TTATTAACATAAAACCCCCAGCTATTTCACAGTATCAAACACCATTATTTGTCTGATCAGTCCTAATTACAGCCGTCCTC
CTTCTGCTATCCCTTCCTGTTTT-AGCTGCAGGAATTACAATGCTTTTAACTGATCGTAACCTAAACACCACATTCTTTG
ACCCGGCAGGCGGAGGAGAC
>5539B_5539|Bunocephalus.colombianus|COI-5P
TTATTAATTCGAGCAGAGTTAAGCCAACCCGGAGCCTTACTAGGCGACGACCAAATTTATAATGTTATTGTTACTGCACA
CGCCTTCGTAATAATTTTCTTTATAGTAATACCAATTATAATCGGAGGTTTCGGAAACTGATTAGTTCCCCTTATGATTG
GGGCGCCAGACATGGCATTCCCACGAATAAATAACATAAGCTTTTGACTCCTTCCCCCTTCCTTCCTCCTTCTGCTCGCC
TCTTCTGGGGTAGAGGCTGGAGCTGGGACAGGATGAACAGTATACCCCCCTCTTGCAGGCAACCTTGCCCACGCAGGAGC
CTCTGTTGATTTAACTATCTTCTCCCTCCACCTGGCCGGTGTATCTTCAATCCTGGGAGCCATTAATTTTATTACAACCA
TTATCAATATGAAACCCCCAGCCATCTCACAATACCAAACACCACTATTTGTCTGAGCAGTTCTGATCACAGCCGTTCTT
CTACTACTAGCCCTCCCTGTCCT-AGCTGCAGGAATTACAATACTTTTAACAGATCGTAATCTAAACACTACATTCTTTG
ACCCAGCAGGCGGAGGAGAT
>5539A_5539|Bunocephalus.colombianus|COI-5P
TTATTAATTCGAGCAGAGTTAAGCCAACCCGGAGCCTTACTAGGCGACGACCAAATTTATAATGTTATTGTTACTGCACA
CGCCTTCGTAATAATTTTCTTTATAGTAATACCAATTATAATCGGAGGTTTCGGAAACTGATTAGTTCCCCTTATGATTG
GGGCGCCAGACATGGCATTCCCACGAATAAATAACATAAGCTTTTGACTCCTTCCCCCTTCCTTCCTCCTTCTGCTCGCC
TCTTCTGGGGTAGAGGCTGGAGCTGGGACAGGATGAACAGTATACCCCCCTCTTGCAGGCAACCTTGCCCACGCAGGAGC
CTCTGTTGATTTAACTATCTTCTCCCTCCACCTGGCCGGTGTATCTTCAATCCTGGGAGCCATTAATTTTATTACAACCA
TTATCAATATGAAACCCCCAGCCATCTCACAATACCAAACACCACTATTTGTATGAGCAGTTCTGATCACAGCCGTTCTT
CTACTACTAGCCCTCCCTGTCCT-AGCTGCAGGAATTACAATACTTTTAACAGATCGTAATCTAAACACTACATTCTTTG
ACCCAGCAGGCGGAGGAGAT
>7489_2285|Trichomycterus.banneaui|COI-5P
TTGTTAATTCGAGCAGAGTTAAGCCAACCCGGAGCCTTACTAGGCGACGACCAAATTTATAATGTTATTGTTACTGCACA
CGCCTTCGTAATAATTTTCTTTATAGTAATACCAATTATAATCGGAGGTTTCGGAAACTGATTAGTTCCCCTTATGATTG
GGGCGCCAGACATGGCATTCCCACGAATAAATAACATAAGCTTTTGACTCCTTCCCCCTTCCTTCCTCCTCCTGCTCGCC
TCTTCTGGGGTAGAGGCTGGAGCTGGGACAGGATGAACAGTATACCCCCCTCTTGCAGGCAACCTTGCCCACGCAGGAGC
CTCTGTTGATTTAACTATCTTCTCCCTCCACCTGGCCGGAGTGTCTTCAATCCTGGGAGCCATTAATTTTATTACAACCA
TTATTAATATGAAACCCCCAGCCATCTCACAATACCAAACACCACTATTTGTCTGAGCAGTTCTGATTACAGCCGTTCTC
CTGCTACTAGCCCTCCCTGTTCT-AGCTGCAGGAATTACAATACTTTTAACAGATCGTAATCTAAACACCACATTCTTTG
ACCCAGCAGGTGGAGGAGAC
>9034_5060|Astroblepus.sp|COI-5P
TTATTAATTCGAGCAGAGTTAAGCCAACCCGGAGCCTTACTAGGCGACGACCAAATTTATAATGTTATTGTTACTGCACA
CGCCTTCGTAATAATTTTCTTTATAGTAATACCAATTATGATCGGAGGTTTCGGAAACTGATTAGTTCCCCTTATGATTG
GAGCGCCAGACATGGCATTCCCACGAATAAATAACATAAGCTTTTGACTTCTCCCCCCTTCCTTCCTCCTCCTGCTCGCC
TCTTCTGGGGTAGAGGCTGGGGCTGGGACAGGATGAACAGTATACCCCCCTCTTGCAGGCAACCTTGCCCACGCAGGAGC
CTCTGTTGATTTAACTATCTTCTCCCTCCACCTGGCCGGTGTGTCTTCAATCCTGGGAGCCATTAATTTTATTACAACCA
TTATTAATATGAAACCACCAGCCATCTCACAATACCAAACACCACTATTTGTCTGAGCAGTTCTGATTACAGCCGTTCTC
CTGTTACTATCCCTCCCTGTCCT-AGCTGCAGGAATTACAATACTTTTAACAGATCGTAATCTAAACACTACATTCTTTG
ACCCAGCAGGTGGAGGAGAT
>8569_3893|Trichomycterus.caliensis|COI-5P
CCTCTACCTTGTGTTTGGTGCTTGAGCCGGTATAGTTGGTACCGCCCTTAGCTTGTTAATTCGAGCAGAGTTAAGCCAAC
CCGGAGCCTTGCTAGGCGACGACCAAATTTATAATGTTATTGTTACCGCACACGCCTTCGTAATAATTTTCTTTATAGTA
ATACCAATTATGATTGGAGGCTTCGGAAACTGACTAGTCCCTCTTATGATTGGAGCACCTGATATGGCATTCCCACGAAT
AAATAACATAAGCTTTTGACTTCTTCCCCCATCCTTTCTTCTACTGCTCGCCTCTTCTGGAGTAGAAGCAGGAGCAGGAA
CCGGATGAACCGTTTACCCTCCTCTTGCCGGTAATCTTGCCCACGCGGGAGCCTCTGTTGATTTAACCATCTTCTCCCTC
CACCTAGCCGGTGTTTCTTCAATCTTGGGGGCTATTAATTTTATTACAACAATTATTAACATAAAACCCCCAGCTATTTC
ACAGTATCAAACACCATTATTTGTCTGATCAGTCCTAATTACAGCCGTCCTCCTTCTGCTATCCCTTCCTGTTTTAGCTG
CAGGAATTACAATGCTTTTAACTGATCGTAACCTAAACACCACATTCTTTGACCCGGCAGGCGGAGGAGACCCAATTCTA
TATCAACACTT
>8272_3770|Ageneiosus.pardalis|COI-5P
CCTTCTAATTCGAGCAGAGCTAGCCCAACCCGGCGCCCTTTTAGGCGACGATCAAATTTATAATGTCATCGTCACTGCTCACGCTTTCGTAATAATCTTCTTTATAGTAATACCCATTATGATTGGGGGCTTTGGGAACTGACTTATCCCACTAATAATTGGTGCACCAGACATGGCATTCCCACGAATAAACAATATGAGTTTCTGATTACTCCCGCCCTCCTTTCTACTACTGCTTTCCTCATCTGGGGTAGAAGCTGGGGTAGGAACAGGATGAACTGTTTATCCCCCCCTCGCCGGAAACCTAGCACATGCAGGAGCTTCCGTAGATCTAGCTATTTTTTCCCTCCACCTTGCCGGGGTGTCATCCATTCTGGGAGCCATTAACTTTATTACAACTATTATTAACATAAAACCCCCAGCCATCTCACAATATCAAACGCCCCTATTTGTATGAGCCACCCTAATTACAGCAGTACTATTATTACTATCACTCCCTGTCCTAGCTGCTGGTATTACAATATTACTAACGGACCGAAATTTAAATACTACATTCTTCGACCCCGCAGGAGGAGGAGACCCAATTCTTTACCAACACCTATTCTGATTTTTTGGTCCCC
>5654C_5654|Imparfinis.sp|COI-5P
CTGGCCCAACCCGGCGCCCTCCTGGGTGATGACCAAATCTATAACGTCATCGTCACTGCTCATGCCTTCGTAATAATTTT
CTTCATAGTAATACCAATCATGATCGGGGGATTTGGAAACTGATTAGTCCCACTAATAATTGGAGCACCCGATATGGCAT
TCCCACGAATAAATAACATAAGCTTCTGACTACTACCACCATCATTCCTCCTCCTACTTGCTTCATCAGGGGTAGAAGCT
GGAGCAGGAACAGGATGAACTGTATACCCCCCTCTCGCCGGAAACCTTGCACATGCAGGCGCTTCTGTGGATCTAACTAT
TTTTTCCCTCCACCTAGCAGGAGTTTCATCCATTTTAGGAGCTATTAACTTCATTACAACAATTATTAATATGAAACCCC
CAGCCATCTCACAATACCAAACACCATTATTTGTATGGTCAGTCCTAATCACAGCAGTTCTACTTCTATTATCACTACCA
GTACTGGCCGCAGGCATTACAATGTTGTTAACGGACCGAAACTTAAACACAACATTCTTTGACCCAGCAGGAGGAGGAGA
CCCAATTCTTTACCAACATTTATTC
>7478_2235|Astroblepus.trifasciatus|COI-5P
GCTCTTAGTCTACTAATTCGAGCAGAATTAAGCCAACCCGGCTCCCTACTTGGCGACGATCAAATCTACAATGTAATCGT
CACCGCACATGCTTTCGTAATAATCTTCTTCATAGTAATACCAATCATAATTGGCGGCTTTGGTAACTGACTAGTTCCAC
TTATAATCGGAGCACCAGACATGGCATTCCCACGAATAAACAATATAAGCTTCTGACTGCTCCCTCCATCCTTTCTCTTG
CTATTAGCTTCCTCCGGAGTTGAAGCCGGGGCCGGAACAGGGTGAACAGTATACCCCCCGCTTGCTGGAAATTTAGCTCA
CGCAGGAGCTTCAGTAGACCTCACCATCTTTTCTCTCCACCTGGCCGGTATCTCTTCAATTCTAGGAGCAATTAACTTCA
TTACCACCATCATTAACATAAAACCCCCTGCAATTTCACAATACCAAACACCCTTGTTCGTATGAGCAGTTTTAGTTACA
GCTGTCCTACTACTTCTATCCCTCCCCGTGCTCGCTGCGGGAATCACCATGCTACTAACAGACCGAAACCTAAATACTAC
ATTCTTTGACCCTGCAGGAGGAGGGGACCCAATTCTCTACCAACATCTTTT
>7497_2450|Astroblepus.trifasciatus|COI-5P
GCTCTTAGTCTACTAATTCGAGCAGAATTAAGCCAACCCGGCTCCCTACTTGGCGACGATCAAATCTACAATGTAATCGT
CACCGCACATGCTTTCGTAATAATCTTCTTCATAGTAATACCAATCATAATTGGCGGCTTTGGTAACTGACTAGTTCCAC
TTATAATCGGAGCACCAGACATGGCATTCCCACGAATAAACAATATAAGCTTCTGACTGCTCCCTCCATCCTTTCTCTTG
CTATTAGCTTCCTCCGGAGTTGAAGCCGGGGCCGGAACAGGGTGAACAGTATACCCCCCGCTTGCTGGAAATTTAGCTCA
CGCAGGAGCTTCAGTAGACCTCACCATCTTTTCTCTCCACCTGGCCGGTATCTCTTCAATTCTAGGAGCAATTAACTTCA
TTACCACCATCATTAACATAAAACCCCCTGCAATTTCACAATACCAAACACCCTTGTTCGTATGAGCAGTTTTAGTTACA
GCTGTCCTACTACTTCTATCCCTCCCCGTGCTCGCTGCGGGAATCACCATGCTACTAACAGACCGAAACCTAAATACTAC
ATTCTTTGACCCTGCAGGAGGAGGGGACCCAATTCTCTACCAACATCTTTT
>7506_2419|Astroblepus.trifasciatus|COI-5P
GCCAACCCGGCTCCCTACTTGGCGACGATCAAATCTACAATGTAATCGTCACCGCACATGCTTTCGTAATAATCTTCTTC
ATAGTAATACCAATCATAATTGGCGGCTTTGGTAACTGACTAGTTCCACTTATAATCGGAGCACCAGACATGGCATTCCC
ACGAATAAACAATATAAGCTTCTGACTGCTCCCTCCATCCTTTCTCTTGCTATTAGCTTCCTCCGGAGTTGAAGCCGGGG
CCGGAACAGGGTGAACAGTATACCCCCCGCTTGCTGGAAATTTAGCTCACGCAGGAGCTTCAGTAGACCTCACCATCTTT
TCTCTCCACCTGGCCGGTATCTCTTCAATTCTAGGAGCAATTAACTTCATTACCACCATCATTAACATAAAACCCCCTGC
AATTTCACAATACCAAACACCCTTGTTCGTATGAGCAGTTTTAGTTACAGCTGTCCTACTACTTCTATCCCTCCCCGTGC
TCGCTGCGGGAATCACCATGCTACTAACAGACCGAAACCTAAATACTACATTCTTTGACCCTGCAGGAGGAGGGGACCCA
ATTCTCTACCAACATCTTTTT
>7513_2432|Astroblepus.trifasciatus|COI-5P
NNNNNNNNNNNNNNNNNNNNNNNNNNNNNNNNNNNNCTACTGGGTGACGACCAGATTTATAATGTTATCGTTACTGCACA
TGCCTTTGTAATAATTTTCTTTATAGTAATACCGATTATAATTGGAGGCTTTGGAAACTGGTTAATTCCCCTCATGATTG
GGGCACCAGACATGGCATTTCCCCGAATAAATAACATAAGCTTCTGACTACTTCCACCATCTTTCCTTCTTCTCTTGGCC
TCCTCTGGGGTTGAAGCCGGGGCTGGGACAGGTTGAACTGTCTATCCCCCCCTCGCCGGAAATTTGGCCCATGCAGGAGC
TTCAGTAGACTTAACCATCTTCTCCCTCCACCTCGCTGGGGTTTCCTCTATTCTTGGTGCCATTAATTTTATTACAACCA
TTATTAACATAAAACCCCCAGCCATCTCACAATACCAAACCCCGTTGTTTGTGTGAGCAGTACTAATTACAGCTGTTCTC
CTTCTCCTATCACTGCCTGTCCT-GGCTGCCGGAATTACCATGCTTCTAACAGATCGAAACCTTAACACCACATTCTTTG
ACCCCGCGGGCGGAGGGGAC
>9003_5050|Astroblepus.sp|COI-5P
CTTCTAATTCGAGCAGAACTGAGCCAACCCGGATCCCTACTGGGTGACGACCAGATTTATAATGTTATCGTTACTGCACA
TGCCTTTGTAATAATTTTCTTTATAGTAATACCGATTATAATTGGAGGCTTTGGAAACTGGTTAATTCCCCTCATGATTG
GGGCACCAGACATGGCATTTCCCCGAATAAATAACATAAGCTTCTGACTACTTCCACCATCTTTCCTTCTTCTCTTGGCC
TCCTCTGGGGTTGAAGCCGGGGCTGGGACAGGTTGAACTGTCTATCCCCCCCTCGCCGGAAATTTGGCCCATGCAGGAGC
TTCAGTAGACTTAACCATCTTCTCCCTCCACCTCGCTGGGGTTTCCTCTATTCTTGGTGCCATTAATTTTATTACAACCA
TTATTAACATAAAACCCCCAGCCATCTCACAATACCAAACCCCGTTGTTTGTGTGAGCAGTACTAATTACAGCTGTTCTC
CTTCTCCTATCACTGCCTGTCCT-GGCTGCCGGAATTACCATGCTTCTAACAGATCGAAACCTTAACACCACATTCTTTG
ACCCCGCGGGCGGAGGGGAC
>7463_2214|Astroblepus.sp|COI-5P
GCTCTTAGTCTACTAATTCGGGCAGAATTAAGCCAACCCGGCTCCCTACTTGGCGACGATCAAATCTATAATGTTATCGT
CACTGCCCACGCATTCGTAATAATCTTCTTCATGGTAATACCAATCATAATTGGTGGCTTTGGTAACTGATTAGTCCCGC
TTATAATCGGAGCACCAGATATGGCATTTCCACGAATAAATAATATGAGCTTCTGATTACTCCCTCCCTCCTTTCTCTTG
TTACTAGCTTCCTCCGGAGTTGAAGCCGGGGCCGGAACAGGATGAACTGTATACCCGCCCCTTGCTGGAAATTTAGCCCA
CGCAGGAGCTTCAGTTGACCTCACCATCTTCTCCCTGCACCTAGCCGGGATTTCTTCAATTCTAGGCGCAATTAACTTCA
TTACCACCATCATCAACATAAAACCCCCAGCAATTTCACAATACCAGACACCCTTATTCGTATGGGCAGTTTTAGTTACA
GCTGTCCTACTACTTCTATCCCTCCCCGTGCTCGCTGCTGGAATTACTATACTTCTCACAGACCGAAACCTTAATACCAC
GTTCTTTGACCCTGCAGGAGGAGGAGACCCAATT
>7481_2237|Astroblepus.sp|COI-5P
CTCTTAGTCTACTAATTCGGGCAGAATTAAGCCAACCCGGCTCCCTACTTGGCGACGATCAAATCTATAATGTTATCGTC
ACTGCCCACGCATTCGTAATAATCTTCTTCATGGTAATACCAATCATAATTGGTGGCTTTGGTAACTGATTAGTCCCGCT
TATAATCGGAGCACCAGATATGGCATTTCCACGAATAAATAATATGAGCTTCTGATTACTCCCTCCCTCCTTTCTCTTGT
TACTAGCTTCCTCCGGAGTTGAAGCCGGGGCCGGAACAGGATGAACTGTATACCCGCCCCTTGCTGGAAATTTAGCCCAC
GCAGGAGCTTCAGTTGACCTCACCATCTTCTCCCTGCACCTAGCCGGGATTTCTTCAATTCTAGGCGCAATTAACTTCAT
TACCACCATCATCAACATAAAACCCCCAGCAATTTCACAATACCAGACACCCTTATTCGTATGGGCAGTTTTAGTTACAG
CTGTCCTACTACTTCTATCCCTCCCCGTGCTCGCTGCTGGAATTACTATACTTCTCACAGACCGAAACCTTAATACCACG
TTCTTTGACCCTGCAGGAGGAGGAGACCCAATT
>7572_2548|Astroblepus.sp|COI-5P
GAGCAGGAATAGTKGGAACAGCTCTTAGTCTACTAATTCGGGCAGAATTAAGCCAACCCGGCTCCCTACTTGGCGACGAT
CAAATCTATAATGTTATCGTCACTGCCCACGCATTCGTAATAATCTTCTTCATGGTAATACCAATCATAATTGGTGGCTT
TGGTAACTGATTAGTCCCGCTTATAATCGGAGCACCAGATATGGCATTTCCACGAATAAATAATATGAGCTTCTGATTAC
TCCCTCCCTCCTTTCTCTTGTTACTAGCTTCCTCCGGAGTTGAAGCCGGGGCCGGAACAGGATGAACTGTATACCCGCCC
CTTGCTGGAAATTTAGCCCACGCAGGAGCTTCAGTTGACCTCACCATCTTCTCCCTGCACCTAGCCGGAATTTCTTCAAT
TCTAGGCGCAATTAACTTCATTACCACCATCATCAACATAAAACCCCCAGCAATTTCACAATACCAGACACCCTTATTCG
TATGGGCAGTTTTAGTTACAGCTGTCCTACTACTTCTATCCCTCCCCGTGCTCGCTGCTGGAATTACTATACTTCTCACA
GACCGAAACCTTAATACCACGTTCTTTGACCCTGCAGGAGGAGGAGACCCAATT
>7573_2548|Astroblepus.sp|COI-5P
CTCTTAGTCTACTAATTCGGGCAGAATTAAGCCAACCCGGCTCCCTACTTGGCGACGATCAAATCTATAATGTTATCGTC
ACTGCCCACGCATTCGTAATAATCTTCTTCATGGTAATACCAATCATAATTGGTGGCTTTGGTAACTGATTAGTCCCGCT
TATAATCGGAGCACCAGATATGGCATTTCCACGAATAAATAATATGAGCTTCTGATTACTCCCTCCCTCCTTTCTCTTGT
TACTAGCTTCCTCCGGAGTTGAAGCCGGGGCCGGAACAGGATGAACTGTATACCCGCCCCTTGCTGGAAATTTAGCCCAC
GCAGGAGCTTCAGTTGACCTCACCATCTTCTCCCTGCACCTAGCCGGAATTTCTTCAATTCTAGGCGCAATTAACTTCAT
TACCACCATCATCAACATAAAACCCCCAGCAATTTCACAATACCAGACACCCTTATTCGTATGGGCAGTTTTAGTTACAG
CTGTCCTACTACTTCTATCCCTCCCCGTGCTCGCTGCTGGAATTACTATACTTCTCACAGACCGAAACCTTAATACCACG
TTCTTTGACCCTGCAGGAGGAGGAGACCCAATT
>7967_3445|Astroblepus.sp|COI-5P
CTTTTGATTCGAGCAGAGCTTAGCCAGCCCGGATCCCTGCTAGGCGATGACCAGATTTATAATGTTATCGTTACCGCACA
TGCTTTCGTAATAATCTTCTTTATAGTAATGCCAATTATGATCGGAGGATTTGGGAACTGATTAGTTCCTCTAATGATCG
GAGCCCCCGACATAGCATTCCCTCGAATAAATAACATAAGCTTTTGACTACTACCCCCATCTTTCCTTCTCCTTCTGGCT
TCCTCCGGAGTCGAGGCTGGAGCCGGAACAGGTTGAACTGTTTATCCCCCTCTTGCCGGAAATTTAGCCCATGCAGGAGC
CTCTGTAGACTTAACCATTTTCTCACTCCACCTCGCCGGGGTTTCTTCAATTCTGGGGGCAATTAATTTTATTACAACCA
TTATTAACATGAAACCTCCAGCCATTTCTCAATACCAAACACCTTTATTTGTGTGAGCCATCCTAATTACAGCGGTACTC
CTTCTTCTTTCCCTACCCGTTCT-GGCCGCCGGAATTACAATGCTCTTAACAGACCGAAATCTTAACACCACATTCTTCG
ATCCTGCTGGAGGAGGAGAC
>6214F_6214|Rhamdia.guatemalensis|COI-5P
CTCATGCCTTCGTAATAATTTTCTTTATAGTAATACCCATTATGATCGGAGGGTTTGGAAACTGACTTGTACCATTAATG
ATTGGTGCCCCAGACATAGCCTTCCCCCGAATGAATAACATAAGCTTTTGACTCCTTCCCCCATCATTTCTTCTTCTGCT
TGCCTCATCTGGCGTAGAAGCAGGGGTTGGAACAGGCTGAACTGTCTATCCGCCCCTTGCCGGAAATCTGGCACACGCTG
GAGCTTCCGTTGACCTTGCTATCTTCTCCCTTCACCTTGCAGGTGTGTCCTCCATTCTAGGGGCAATTAATTTTATTACA
ACCATTATTAACATGAAACCGCCAGCCATTTCGCAATACCAAACACCGCTGTTTGTATGAGCTATTCTAATTACCGCAGT
ACTTCTTCTGCTCTCCCTCCCAGTTCTAGCCGCCGGAATTACAATACTTCTGACGGACCGAAACTTAAATACCACCTTCT
TTGACCCAGCAGGCGGAGGTGATCTATTCTCTATCAACATCTATT
>5098A_5098|Chaetostoma.thomsoni|COI-5P
CTTTTAATTCGGGCTGAGCTGAGCCAACCAGGCTCTCTATTAGGCGATGATCAAATTTATAACGTCATCGTTACCGCACA
TGCCTTCGTAATAATTTTCTTTATGGTAATGCCAATTATAATCGGGGGCTTTGGAAACTGGCTAGTGCCACTAATAATTG
GGGCCCCAGATATGGCCTTCCCCCGAATAAACAACATAAGCTTCTGATTGCTCCCTCCATCATTCCTTCTCTTGTTGGCC
TCCTCAGGGGTCGAAGCAGGGGCAGGAACAGGTTGAACTGTATATCCCCCACTCGCCGGAAACTTGGCCCACGCAGGGGC
CTCGGTTGATCTGACCATTTTTTCACTTCACCTGGCTGGTGTCTCCTCAATTCTAGGGGCAATCAATTTTATTACCACGA
TTATTAACATAAAACCCCCAGCCATCTCACAATACCAAACTCCTTTATTTGTGTGGGCTGTGCTTATTACCGCCGTCCTA
CTCCTGCTTTCACTACCCGTTCT-AGCTGCTGGCATTACAATACTGCTAACAGACCGAAACTTAAACACTACCTTCTTTG
ATCCTGCAGGAGGTGGAGAC
>5098_5098|Chaetostoma.thomsoni|COI-5P
CTTTTAATTCGGGCTGAGCTGAGCCAACCAGGCTCTCTATTAGGCGATGATCAAATTTATAACGTCATCGTTACCGCACA
TGCCTTCGTAATAATTTTCTTTATGGTAATGCCAATTATAATCGGGGGCTTTGGAAACTGGCTAGTGCCACTAATAATTG
GGGCCCCAGATATGGCCTTCCCCCGAATAAACAACATAAGCTTCTGATTGCTCCCTCCATCATTCCTTCTCTTGTTGGCC
TCCTCAGGGGTCGAAGCAGGGGCAGGAACAGGTTGAACTGTATATCCCCCACTCGCCGGAAACTTGGCCCACGCAGGGGC
CTCGGTTGATCTGACCATTTTTTCACTTCACCTGGCTGGTGTCTCCTCAATTCTAGGGGCAATCAATTTTATTACCACGA
TTATTAACATAAAACCCCCAGCCATCTCACAATACCAAACTCCTTTATTTGTGTGGGCTGTGCTTATTACCGCCGTCCTA
CTCCTGCTTTCACTACCCGTTCT-AGCTGCTGGCATTACAATACTGCTAACAGACCGAAACTTAAACACTACCTTCTTTG
ATCCTGCAGGAGGTGGAGAC
>5100A_5100|Chaetostoma.thomsoni|COI-5P
CTTTTAATTCGGGCTGAGCTGAGCCAACCAGGCTCTCTATTAGGCGATGATCAAATTTATAACGTCATCGTTACCGCACA
TGCCTTCGTAATAATTTTCTTTATGGTAATGCCAATTATAATCGGGGGCTTTGGAAACTGGCTAGTGCCACTAATAATTG
GGGCCCCAGATATGGCCTTCCCCCGAATAAACAACATAAGCTTCTGATTGCTCCCTCCATCATTCCTTCTCTTGTTGGCC
TCCTCAGGGGTCGAAGCAGGGGCAGGAACAGGTTGAACTGTATATCCCCCACTCGCCGGAAACTTGGCCCACGCAGGGGC
CTCGGTTGATCTGACCATTTTTTCACTTCACCTGGCTGGTGTCTCCTCAATTCTAGGGGCAATCAATTTTATTACCACGA
TTATTAACATAAAACCCCCAGCCATCTCACAATACCAAACTCCTTTATTTGTGTGGGCTGTGCTTATTACCGCCGTCCTA
CTCCTGCTTTCACTACCCGTTCT-AGCTGCTGGCATTACAATACTGCTAACAGACCGAAACTTAAACACTACCTTCTTTG
ATCCTGCAGGAGGTGGAGAC
>5100B_5100|Chaetostoma.thomsoni|COI-5P
ACCTAGTATTTGGTGCCTGAGCCGGTATGGTAGGCACAGCTCTTAGTCTTTTAATTCGGGCTGAGCTGAGCCAACCAGGC
TCTCTATTAGGCGATGATCAAATTTATAACGTCATCGTTACCGCACATGCCTTCGTAATAATTTTCTTTATGGTAATGCC
AATTATAATCGGGGGCTTTGGAAACTGGCTAGTGCCACTAATAATTGGGGCCCCAGATATGGCCTTCCCCCGAATAAACA
ACATAAGCTTCTGATTGCTCCCTCCATCATTCCTTCTCTTGTTGGCCTCCTCAGGGGTCGAAGCAGGGGCAGGAACAGGT
TGAACTGTATATCCCCCACTCGCCGGAAACTTGGCCCACGCAGGGGCCTCGGTTGATCTGACCATTTTTTCACTTCACCT
GGCTGGTGTCTCCTCAATTCTAGGGGCAATCAATTTTATTACCACGATTATTAACATAAAACCCCCAGCCATCTCACAAT
ACCAAACTCCTTTATTTGTGTGGGCTGTGCTTATTACCGCCGTCCTACTCCTGCTTTCACTACCCGTTCTAGCTGCTGGC
ATTACAATACTGCTAACAGACCGAAACTTAAACACTACCTTCTTTGATCCTGCAGGAGGTGGAGACCCGATTCTCTATCA
GCACTTATT
>5100C_5100|Chaetostoma.thomsoni|COI-5P
GAGCCGGTATGGTAGGCACAGCTCTTAGTCTTTTAATTCGGGCTGAGCTGAGCCAACCAGGCTCTCTATTAGGCGATGAT
CAAATTTATAACGTCATCGTTACCGCACATGCCTTCGTAATAATTTTCTTTATGGTAATGCCAATTATAATCGGGGGCTT
TGGAAACTGGCTAGTGCCACTAATAATTGGGGCCCCAGATATGGCCTTCCCCCGAATAAACAACATAAGCTTCTGATTGC
TCCCTCCATCATTCCTTCTCTTGTTGGCCTCCTCAGGGGTCGAAGCAGGGGCAGGAACAGGTTGAACTGTATATCCCCCA
CTCGCCGGAAACTTGGCCCACGCAGGGGCCTCGGTTGATCTGACCATTTTTTCACTTCACCTGGCTGGTGTCTCCTCAAT
TCTAGGGGCAATCAATTTTATTACCACGATTATTAACATAAAACCCCCAGCCATCTCACAATACCAAACTCCTTTATTTG
TGTGGGCTGTGCTTATTACCGCCGTCCTACTCCTGCTTTCACTACCCGTTCTAGCTGCTGGCATTACAATACTGCTAACA
GACCGAAACTTAAACACTACCTTCTTTGATCCTGCAGGAGGTGGAGACCCGATTCTCTATCAGCACTTATTC
>9010_5053|Chaetostoma.thomsoni|COI-5P
CTTTTAATTCGGGCTGAGCTGAGCCAACCAGGCTCTCTATTAGGCGATGATCAAATTTATAACGTCATCGTTACCGCACA
TGCCTTCGTAATAATTTTCTTTATGGTAATGCCAATTATAATCGGGGGCTTTGGAAACTGGCTAGTGCCACTAATAATTG
GGGCCCCAGATATGGCCTTCCCCCGAATAAACAACATAAGCTTCTGATTGCTCCCTCCATCATTCCTTCTCTTGTTGGCC
TCCTCAGGGGTCGAAGCAGGGGCAGGAACAGGTTGAACTGTATATCCCCCACTCGCCGGAAACTTGGCCCACGCAGGGGC
CTCGGTTGATCTGACCATTTTTTCACTTCACCTGGCTGGTGTCTCCTCAATTCTAGGGGCAATCAATTTTATTACCACGA
TTATTAACATAAAACCCCCAGCCATCTCACAATACCAAACTCCTTTATTTGTGTGGGCTGTGCTTATTACCGCCGTCCTA
CTCCTGCTTTCACTACCCGTTCT-AGCTGCTGGCATTACAATACTGCTAACAGACCGAAACTTAAACACTACCTTCTTTG
ATCCTGCAGGAGGTGGAGAC
>8566_3937|Chaetostoma.thomsoni|COI-5P
GGTGCNTGANCCGGTATGGTAGGCACAGCTCTTAGTCTTTTAATTCGGGCTGAGCTGAGCCAACCAGGCTCTCTATTAGG
CGATGATCAAATTTATAACGTCATCGTTACCGCACATGCCTTCGTAATAATTTTCTTTATGGTAATGCCAATTATAATCG
GGGGCTTTGGAAACTGGCTAGTGCCACTAATAATTGGGGCCCCAGATATGGCCTTCCCCCGAATGAACAACATAAGCTTC
TGATTGCTCCCTCCATCATTCCTTCTCTTGTTGGCCTCCTCAGGGGTTGAAGCAGGGGCAGGAACAGGTTGAACTGTATA
TCCCCCACTCGCCGGAAACTTGGCCCACGCAGGGGCCTCGGTTGATCTGACCATTTTTTCACTTCACCTGGCTGGTGTCT
CCTCAATTCTGGGGGCAATCAATTTTATTACCACGATTATTAACATAAAACCCCCAGCCATCTCACAATACCAAACTCCT
TTATTTGTGTGGGCTGTGCTTATTACCGCCGTCCTACTCCTGCTTTCACTACCCGTTCTAGCTGCTGGCATTACAATACT
GCTAACAGACCGAAACTTAAACACTACCTTCTTTGATCCTGCAGGAGGTGGAGACCCGATTCTCTATCAGC
>8560_3915|Chaetostoma.thomsoni|COI-5P
CCTTTACTTAGTATTTGGTGCCTGAGCCGGTATGGTAGGCACAGCTCTTAGTCTTTTAATTCGGGCTGAGCTGAGCCAAC
CAGGCTCTCTATTAGGCGATGATCAAATTTATAACGTCATCGTTACCGCACATGCCTTCGTAATAATTTTCTTTATGGTA
ATGCCAATTATAATCGGGGGCTTTGGAAACTGGCTAGTGCCACTAATAATTGGGGCCCCAGATATGGCCTTCCCCCGAAT
GAACAACATAAGCTTCTGATTGCTCCCTCCATCATTCCTTCTCTTGTTGGCCTCCTCAGGGGTTGAAGCAGGGGCAGGAA
CAGGTTGAACTGTATATCCCCCACTCGCCGGAAACTTGGCCCACGCAGGGGCCTCGGTTGATCTGACCATTTTTTCACTT
CACCTGGCTGGTGTCTCCTCAATTCTGGGGGCAATCAATTTTATTACCACGATTATTAACATAAAACCCCCAGCCATCTC
ACAATACCAAACTCCTTTATTTGTGTGGGCTGTGCTTATTACCGCCGTCCTACTCCTGCTTTCACTACCCGTTCTAGCTG
CTGGCATTACAATACTGCTAACAGACCGAAACTTAAACACTACCTTCTTTGATCCTGCAGGAGGTGGAGACCCGATTCTC
TATCAGCACT
>8561_3915|Chaetostoma.thomsoni|COI-5P
GTGCCTGANCCGGTATGGTAGGCNCANNTNNTAGTCTNNTATTTCGGTCTGAGCTGAGCCAACCAGGCTCTCTATTAGGC
GATGATCAAATTTATAACGTCATCGTTACCGCACATGCCTTCGTAATAATTTTCTTTATGGTAATGCCAATTATAATCGG
GGGCTTTGGAAACTGGCTAGTGCCACTAATAATTGGGGCCCCAGATATGGCCTTCCCCCGAATGAACAACATAAGCTTCT
GATTGCTCCCTCCATCATTCCTTCTCTTGTTGGCCTCCTCAGGGGTTGAAGCAGGGGCAGGAACAGGTTGAACTGTATAT
CCCCCACTCGCCGGAAACTTGGCCCACGCAGGGGCCTCGGTTGATCTGACCATTTTTTCACTTCACCTGGCTGGTGTCTC
CTCAATTCTGGGGGCAATCAATTTTATTACCACGATTATTAACATAAAACCCCCAGCCATCTCACAATACCAAACTCCTT
TATTTGTGTGGGCTGTGCTTATTACCGCCGTCCTACTCCTGCTTTCACTACCCGTTCTAGCTGCTGGCATTACAATACTG
CTAACAGACCGAAACTTAAACACTACCTTCTTTGATCCTGCAGGAGGTGGAGACCCGATTCTCTATCAGCACTTAT
>8567_3937|Chaetostoma.thomsoni|COI-5P
GAGCCGGTATGGTAGGCACAGCTCTTAGTCTTTTAATTCGGGCTGAGCTGAGCCAACCAGGCTCTCTATTAGGCGATGAT
CAAATTTATAACGTCATCGTTACCGCACATGCCTTCGTAATAATTTTCTTTATGGTAATGCCAATTATAATCGGGGGCTT
TGGAAACTGGCTAGTGCCACTAATAATTGGGGCCCCAGATATGGCCTTCCCCCGAATGAACAACATAAGCTTCTGATTGC
TCCCTCCATCATTCCTTCTCTTGTTGGCCTCCTCAGGGGTTGAAGCAGGGGCAGGAACAGGTTGAACTGTATATCCCCCA
CTCGCCGGAAACTTGGCCCACGCAGGGGCCTCGGTTGATCTGACCATTTTTTCACTTCACCTGGCTGGTGTCTCCTCAAT
TCTGGGGGCAATCAATTTTATTACCACGATTATTAACATAAAACCCCCAGCCATCTCACAATACCAAACTCCTTTATTTG
TGTGGGCTGTGCTTATTACCGCCGTCCTACTCCTGCTTTCACTACCCGTTCTAGCTGCTGGCATTACAATACTGCTAACA
GACCGAAACTTAAACACTACCTTCTTTGATCCTGCAGGAGGTGGAGACCCGATTCTCTATCAGCACTTATTC
>8886_4856|Chaetostoma.thomsoni|COI-5P
TTTGGTGCNTGANCCGGAATGGTTGGCACAGCTCTCAGTCTCTTAATTCGGGCTGAGCTGAGCCAACCCGGCTCTCTATT
AGGCGATGATCAAATTTATAACGTCATCGTTACCGCACATGCCTTCGTAATAATTTTCTTTATGGTAATACCAATTATAA
TCGGAGGCTTTGGAAACTGGCTAGTACCACTAATAATTGGGGCCCCCGACATGGCCTTCCCCCGAATGAACAACATAAGC
TTCTGACTGCTCCCCCCATCATTCCTTCTTTTGTTAGCCTCCTCAGGAGTTGAAGCAGGGGCAGGAACAGGTTGAACTGT
ATACCCCCCACTCGCCGGAAACTTGGCTCACGCAGGGGCCTCAGTCGATCTGACCATTTTTTCACTTCACCTGGCTGGTG
TCTCCTCAATTCTTGGAGCAATCAATTTTATTACCACGATTATTAACATAAAACCCCCAGCTATCTCACAATACCAAACT
CCTTTATTTATCTGGGCTGTGCTTATTACCGCCGTCCTACTCCTGCTTTCACTACCCGTTCTAGCTGCTGGTATTACAAT
ACTACTAACAGACCGAAACTTAAACACTACCTTCTTTGACCCTGCAGGGGGTGGAGACCCGATCCTCTATCAG
>8899_4877|Chaetostoma.thomsoni|COI-5P
TACTTAGTATTTGGTGCCTGAGCCGGAATGGTTGGCACAGCTCTCAGTCTCTTAATTCGGGCTGAGCTGAGCCAACCCGG
CTCTCTATTAGGCGATGATCAAATTTATAACGTCATCGTTACCGCACATGCCTTCGTAATAATTTTCTTTATGGTAATAC
CAATTATAATCGGAGGCTTTGGAAACTGGCTAGTACCACTAATAATTGGGGCCCCCGACATGGCCTTCCCCCGAATGAAC
AACATAAGCTTCTGACTGCTCCCCCCATCATTCCTTCTTTTGTTAGCCTCCTCAGGAGTTGAAGCAGGGGCAGGAACAGG
TTGAACTGTATACCCCCCACTCGCCGGAAACTTGGCTCACGCAGGGGCCTCAGTCGATCTGACCATTTTTTCACTTCACC
TGGCTGGTGTCTCCTCAATTCTTGGAGCAATCAATTTTATTACCACGATTATTAACATAAAACCCCCAGCTATCTCACAA
TACCAAACTCCTTTATTTATCTGGGCTGTGCTTATTACCGCCGTCCTACTCCTGCTTTCACTACCCGTTCTAGCTGCTGG
CATTACAATACTACTAACAGACCGAAACTTAAACACTACCTTCTTTGACCCTGCAGGGGGTGGAGACCCGATCCTCTATC
AGCACCTAT
>5126A_5126|Chaetostoma.thomsoni|COI-5P
TAGTATTTGGTGCCTGGGCCGGAATGGTTGGCACAGCTCTCAGTCTTTTAATTCGGGCTGAGCTGAGCCAACCCGGCTCT
CTATTAGGCGATGACCAAATTTATAACGTCATCGTTACCGCACATGCCTTCGTAATAATTTTCTTTATGGTAATGCCAAT
TATAATTGGGGGCTTTGGAAACTGGCTAGTGCCACTAATAATTGGGGCCCCAGATATGGCCTTCCCACGAATGAACAACA
TAAGCTTCTGATTGCTCCCCCCATCATTCCTTCTCTTGTTGGCCTCCTCAGGAGTTGAAGCAGGGGCAGGAACAGGTTGA
ACTGTATACCCCCCACTCGCCGGAAACTTGGCCCACGCAGGGGCCTCGGTTGATCTGACCATTTTTTCACTTCACCTGGC
CGGTGTTTCCTCAATTCTTGGAGCAATCAATTTTATTACCACAATTATTAACATAAAACCCCCAGCTATCTCACAATACC
AAACTCCTTTATTTGTGTGGGCTGTGCTTATTACCGCCGTCCTACTCCTGCTTTCACTACCCGTTCTAGCTGCTGGCATT
ACAATACTGCTAACAGACCGAAACTTAAACACTACCTTCTTTGACCCTGCAGGGGGCGGAGACCCGATCCTCTATCAACA
CCTATT
>7659_2949|Chaetostoma.thomsoni|COI-5P
CCTTTACTTAGTATTTGGTGCCTGAGCCGGTATGGTAGGCACAGCTCTTAGTCTTTTAATTCGGGCTGAGCTGAGCCAAC
CAGGCTCTCTATTAGGCGATGATCAAATTTATAACGTCATCGTTACCGCACATGCCTTCGTAATAATTTTCTTTATGGTA
ATGCCAATTATAATCGGGGGCTTTGGAAACTGGCTAGTGCCACTAATAATTGGGGCCCCAGATATGGCCTTCCCCCGAAT
AAACAACATAAGCTTCTGATTGCTCCCTCCATCATTCCTTCTCTTGTTGGCCTCCTCAGGGGTCGAAGCAGGGGCAGGAA
CAGGTTGAACTGTATATCCCCCACTCGCCGGAAACTTGGCCCACGCAGGGGCCTCGGTTGATCTGACCATTTTTTCACTT
CACCTGGCTGGTGTCTCCTCAATTCTAGGGGCAATCAATTTTATTACCACGATTATTAACATAAAACCCCCAGCCATCTC
ACAATACCAAACTCCTTTATTTGTGTGGGCTGTGCTTATTACCGCCGTCCTACTCCTGCTTTCACTACCCGTTCTAGCTG
CTGGCATTACAATACTGCTAACAGACCGAAACTTAAACACTACCTTCTTTGATCCTGCAGGAGGTGGAGACCCGATTCTC
TATCAGCACTTATT
>5103B_5103|Chaetostoma.thomsoni|COI-5P
GCTGAGCTGAGCCAACCAGGCTCTCTATTAGGCGATGATCAAATTTATAACGTCATCGTTACCGCACATGCCTTCGTAAT
AATTTTCTTTATGGTAATGCCAATTATAATCGGGGGCTTTGGAAACTGGCTAGTGCCACTAATAATTGGGGCCCCAGATA
TGGCCTTCCCCCGAATAAACAACATAAGCTTCTGATTGCTCCCTCCATCATTCCTTCTCTTGTTGGCCTCCTCAGGGGTC
GAAGCAGGGGCAGGAACAGGTTGAACTGTATATCCCCCACTCGCCGGAAACTTGGCCCACGCAGGGGCCTCGGTTGATCT
GACCATTTTTTCACTTCACCTGGCTGGTGTCTCCTCAATTCTAGGGGCAATCAATTTTATTACCACGATTATTAACATAA
AACCCCCAGCCATCTCACAATACCAAACTCCTTTATTTGTGTGGGCTGTGCTTATTACCGCCGTCCTACTCCTGCTTTCA
CTACCCGTTCTAGCTGCTGGCATTACAATACTGCTAACAGACCGAAACTTAAACACTACCTTCTTTGATCCTGCAGGAGG
TGGAGACCCGATTCTCTATCAGCACTTATT
>8377_3971|Chaetostoma.thomsoni|COI-5P
TTTGGTGCCTGGGCCGGTATGGTAGGCACAGCTCTTAGTCTTTTAATTCGGGCTGAGCTGAGCCAACCAGGCTCTCTATT
AGGCGATGATCAAATTTATAACGTCATCGTTACCGCACATGCCTTCGTAATAATTTTCTTTATGGTAATGCCAATTATAA
TCGGGGGCTTTGGAAACTGGCTAGTGCCACTAATAATTGGGGCCCCAGATATGGCCTTCCCCCGAATGAACAACATAAGC
TTCTGATTGCTCCCTCCATCATTCCTTCTCTTGTTGGCCTCCTCAGGGGTTGAAGCAGGGGCAGGAACAGGTTGAACTGT
ATATCCCCCACTCGCCGGAAACTTGGCCCACGCAGGGGCCTCGGTTGATCTGACCATTTTTTCACTTCACCTGGCTGGTG
TCTCCTCAATTCTGGGGGCAATCAATTTTATTACCACGATTATTAACATAAAACCCCCAGCCATCTCACAATACCAAACT
CCTTTATTTGTGTGGGCTGTGCTTATTACCGCCGTCCTACTCCTGCTTTCACTACCCGTTCTAGCTGCTGGCATTACAAT
ACTGCTAACAGACCGAAACTTAAACACTACCTTCTTTGATCCTGCAGGAGGTGGAGACCCGATTCTCTATCAGCA
>8378_3971|Chaetostoma.thomsoni|COI-5P
GCNTGGGCCGGTATGGTAGGCACAGCTCTTAGTCTTTTAATTCGGGCTGAGCTGAGCCAACCAGGCTCTCTATTAGGCGA
TGATCAAATTTATAACGTCATCGTTACCGCACATGCCTTCGTAATAATTTTCTTTATGGTAATGCCAATTATAATCGGGG
GCTTTGGAAACTGGCTAGTGCCACTAATAATTGGGGCCCCAGATATGGCCTTCCCCCGAATGAACAACATAAGCTTCTGA
TTGCTCCCTCCATCATTCCTTCTCTTGTTGGCCTCCTCAGGGGTTGAAGCAGGGGCAGGAACAGGTTGAACTGTATATCC
CCCACTCGCCGGAAACTTGGCCCACGCAGGGGCCTCGGTTGATCTGACCATTTTTTCACTTCACCTGGCTGGTGTCTCCT
CAATTCTGGGGGCAATCAATTTTATTACCACGATTATTAACATAAAACCCCCAGCCATCTCACAATACCAAACTCCTTTA
TTTGTGTGGGCTGTGCTTATTACCGCCGTCCTACTCCTGCTTTCACTACCCGTTCTAGCTGCTGGCATTACAATACTGCT
AACAGACCGAAACTTAAACACTACCTTCTTTGATCCTGCAGGAGGTGGAGACCCGATTCTCTATCAGCA
>8372_3943|Chaetostoma.thomsoni|COI-5P
TAGTATTTGGTGCNTGANCCGGTATGGTAGGCACAGCTCTTAGTCTTTTAATTCGGGCTGAGCTGAGCCAACCAGGCTCT
CTATTAGGCGATGATCAAATTTATAACGTCATCGTTACCGCACATGCCTTCGTAATAATTTTCTTTATGGTAATGCCAAT
TATAATCGGGGGCTTTGGAAACTGGCTAGTGCCACTAATAATTGGGGCCCCAGATATGGCCTTCCCCCGAATGAACAACA
TAAGCTTCTGATTGCTCCCTCCATCATTCCTTCTCTTGTTGGCCTCCTCAGGGGTTGAAGCAGGGGCAGGAACAGGTTGA
ACTGTATATCCCCCACTCGCCGGAAACTTGGCCCACGCAGGGGCCTCGGTTGATCTGACCATTTTTTCACTTCACCTGGC
TGGTGTCTCCTCAATTCTGGGGGCAATCAATTTTATTACCACGATTATTAACATAAAACCCCCAGCCATCTCACAATACC
AAACTCCTTTATTTGTGTGGGCTGTGCTTATTACCGCCGTCCTACTCCTGCTTTCACTACCCGTTCTAGCTGCTGGCATT
ACAATACTGCTAACAGACCGAAACTTAAACACTACCTTCTTTGATCCTGCAGGAGGTGGAGACCCGATTCTCTATCAGCA
>8438_3986|Chaetostoma.thomsoni|COI-5P
TCTTAGTCTTTTAATTCGGGCTGAGCTGAGCCAACCAGGCTCTCTATTAGGCGATGATCAAATTTATAACGTCATCGTTA
CCGCACATGCCTTCGTAATAATTTTCTTTATGGTAATGCCAATTATAATCGGGGGCTTTGGAAACTGGCTAGTGCCACTA
ATAATTGGGGCCCCAGATATGGCCTTCCCCCGAATGAACAACATAAGCTTCTGATTGCTCCCTCCATCATTCCTTCTCTT
GTTGGCCTCCTCAGGGGTTGAAGCAGGGGCAGGAACAGGTTGAACTGTATATCCCCCACTCGCCGGAAACTTGGCCCACG
CAGGGGCCTCGGTTGATCTGACCATTTTTTCACTTCACCTGGCTGGTGTCTCCTCAATTCTGGGGGCAATCAATTTTATT
ACCACGATTATTAACATAAAACCCCCAGCCATCTCACAATACCAAACTCCTTTATTTGTGTGGGCTGTGCTTATTACCGC
CGTCCTACTCCTGCTTTCACTACCCGTTCTAGCTGCTGGCATTACAATACTGCTAACAGACCGAAACTTAAACACTACCT
TCTTTGATCCTGCAGGAGGTGGAGACCCGATTCTCTATCAGC
>8454_4243|Chaetostoma.thomsoni|COI-5P
CTTTTAATTCGGGCTGAGCTGAGCCAACCAGGCTCTCTATTAGGCGATGATCAAATTTATAACGTCATCGTTACCGCACA
TGCCTTCGTAATAATTTTCTTTATGGTAATGCCAATTATAATCGGGGGCTTTGGAAACTGGCTAGTGCCACTAATAATTG
GGGCCCCAGATATGGCCTTCCCCCGAATGAACAACATAAGCTTCTGATTGCTCCCTCCATCATTCCTTCTCTTGTTGGCC
TCCTCAGGGGTTGAAGCAGGGGCAGGAACAGGTTGAACTGTATATCCCCCACTCGCCGGAAACTTGGCCCACGCAGGGGC
CTCGGTTGATCTGACCATTTTTTCACTTCACCTGGCTGGTGTCTCCTCAATTCTGGGGGCAATCAATTTTATTACCACGA
TTATTAACATAAAACCCCCAGCCATCTCACAATACCAAACTCCTTTATTTGTGTGGGCTGTGCTTATTACCGCCGTCCTA
CTCCTGCTTTCACTACCCGTTCT-AGCTGCTGGCATTACAATACTGCTAACAGACCGAAACTTAAACACTACCTTCTTTG
ATCCTGCAGGAGGTGGAGAC
>8409_3956|Chaetostoma.thomsoni|COI-5P
TACTTAGTATTTGGTGCCTGAGCCGGTATGGTAGGCACAGCTCTTAGTCTTTTAATTCGGGCTGAGCTGAGCCAACCAGG
CTCTCTATTAGGCGATGATCAAATTTATAACGTCATCGTTACCGCACATGCCTTCGTAATAATTTTCTTTATGGTAATGC
CAATTATAATCGGGGGCTTTGGAAACTGGCTAGTGCCACTAATAATTGGGGCCCCAGATATGGCCTTCCCCCGAATGAAC
AACATAAGCTTCTGATTGCTCCCTCCATCATTCCTTCTCTTGTTGGCCTCCTCAGGGGTTGAAGCAGGGGCAGGAACAGG
TTGAACTGTATATCCCCCACTCGCCGGAAACTTGGCCCACGCAGGGGCCTCGGTTGATCTGACCATTTTTTCACTTCACC
TGGCTGGTGTCTCCTCAATTCTGGGGGCAATCAATTTTATTACCACGATTATTAACATAAAACCCCCAGCCATCTCACAA
TACCAAACTCCTTTATTTGTGTGGGCTGTGCTTATTACCGCCGTCCTACTCCTGCTTTCACTACCCGTTCTAGCTGCTGG
CATTACAATACTGCTAACAGACCGAAACTTAAACACTACCTTCTTTGATCCTGCAGGAGGTGGAGACCCGATTCTCTATC
AGCACTTATT
>8500_3919|Chaetostoma.thomsoni|COI-5P
TTACTTAGTATTTGGTGCCTGAGCCGGTATGGTAGGCACAGCTCTTAGTCTTTTAATTCGGGCTGAGCTGAGCCAACCAG
GCTCTCTATTAGGCGATGATCAAATTTATAACGTCATCGTTACCGCACATGCCTTCGTAATAATTTTCTTTATGGTAATG
CCAATTATAATCGGGGGCTTTGGAAACTGGCTAGTGCCACTAATAATTGGGGCCCCAGATATGGCCTTCCCCCGAATGAA
CAACATAAGCTTCTGATTGCTCCCTCCATCATTCCTTCTCTTGTTGGCCTCCTCAGGGGTTGAAGCAGGGGCAGGAACAG
GTTGAACTGTATATCCCCCACTCGCCGGAAACTTGGCCCACGCAGGGGCCTCGGTTGATCTGACCATTTTTTCACTTCAC
CTGGCTGGTGTCTCCTCAATTCTGGGGGCAATCAATTTTATTACCACGATTATTAACATAAAACCCCCAGCCATCTCACA
ATACCAAACTCCTTTATTTGTGTGGGCTGTGCTTATTACCGCCGTCCTACTCCTGCTTTCACTACCCGTTCTAGCTGCTG
GCATTACAATACTGCTAACAGACCGAAACTTAAACACTACCTTCTTTGATCCTGCAGGAGGTGGAGACCCGATTCTCTAT
CAGCACTTAT
>8521_3888|Chaetostoma.thomsoni|COI-5P
CTTTTAATTCGGGCTGAGCTGAGCCAACCAGGCTCTCTATTAGGCGATGATCAAATTTATAACGTCATCGTTACCGCACA
TGCCTTCGTAATAATTTTCTTTATGGTAATGCCAATTATAATCGGGGGCTTTGGAAACTGGCTAGTGCCACTAATAATTG
GGGCCCCAGATATGGCCTTCCCCCGAATGAACAACATAAGCTTCTGATTGCTCCCTCCATCATTCCTTCTCTTGTTGGCC
TCCTCAGGGGTTGAAGCAGGGGCAGGAACAGGTTGAACTGTATATCCCCCACTCGCCGGAAACTTGGCCCACGCAGGGGC
CTCGGTTGATCTGACCATTTTTTCACTTCACCTGGCTGGTGTCTCCTCAATTCTGGGGGCAATCAATTTTATTACCACGA
TTATTAACATAAAACCCCCAGCCATCTCACAATACCAAACTCCTTTATTTGTGTGGGCTGTGCTTATTACCGCCGTCCTA
CTCCTGCTTTCACTACCCGTTCT-AGCTGCTGGCATTACAATACTGCTAACAGACCGAAACTTAAACACTACCTTCTTTG
ATCCTGCAGGAGGTGGAGAC
>8907_4886|Chaetostoma.milesi|COI-5P
CTTTTAATTCGGGCTGAGCTGAGCCAACCCGGCTCTCTATTAGGCGATGATCAAATTTATAACGTCATCGTTACCGCACA
TGCCTTCGTAATAATTTTCTTTATGGTAATACCAATTATAATTGGGGGCTTTGGAAACTGGCTAGTACCACTAATGATTG
GAGCCCCAGATATGGCCTTCCCACGAATGAACAACATAAGCTTCTGATTGCTCCCCCCATCATTCCTTCTCTTATTGGCC
TCCTCAGGAGTTGAAGCAGGGGCAGGAACAGGTTGAACTGTATATCCCCCACTCGCCGGAAATTTGGCCCACGCAGGGGC
CTCGGTTGATCTGACCATTTTTTCACTCCACCTGGCCGGTGTCTCCTCAATTCTTGGAGCAATCAACTTTATTACCACGA
TTATTAACATAAAACCCCCAGCTATCTCACAATACCAAACTCCTTTATTTGTGTGAGCTGTGCTTATTACCGCCGTCCTA
CTCCTGCTTTCACTACCCGTTCT-AGCTGCTGGTATTACAATACTGCTAACAGACCGAAACTTAAACACTACCTTCTTTG
ACCCTGCAGGGGGTGGAGAC
>5316A_5316|Chaetostoma.thomsoni|COI-5P
CTTTTAATTCGGGCTGAGCTGAGCCAACCCGGCTCTCTATTAGGCGATGATCAAATTTATAACGTCATCGTTACCGCACA
TGCCTTCGTAATAATTTTCTTTATGGTAATGCCAATTATAATCGGGGGCTTTGGAAACTGGCTAGTGCCACTGATGATTG
GGGCCCCAGATATGGCCTTCCCCCGAATAAACAACATAAGCTTCTGGTTGCTTCCCCCATCATTCCTTCTCTTGTTAGCC
TCCTCAGGAGTTGAAGCAGGGGCAGGAACAGGTTGAACTGTGTATCCCCCACTCGCCGGAAATTTGGCCCACGCAGGGGC
CTCGGTTGATCTGACCATTTTTTCACTTCACCTGGCCGGTGTCTCCTCAATTCTTGGGGCAATCAATTTTATTACTACGA
TTATTAACATAAAACCCCCAGCTATCTCACAATATCAGACTCCTTTATTTGTATGGGCTGTGCTTATTACCGCCGTCCTA
CTCCTGCTTTCACTACCCGTTCT-AGCTGCTGGTATTACAATACTACTAACAGACCGAAACTTAAACACCACCTTTTTTG
ACCCTGCAGGGGGTGGAGAC
>5322E_5322|Chaetostoma.thomsoni|COI-5P
CTTTTAATTCGGGCTGAGCTGAGCCAACCCGGCTCTCTATTAGGCGATGATCAAATTTATAACGTCATCGTTACCGCACA
TGCCTTCGTAATAATTTTCTTTATGGTAATGCCAATTATAATCGGGGGCTTTGGAAACTGGCTAGTGCCACTGATGATTG
GGGCCCCAGATATGGCCTTCCCCCGAATAAACAACATAAGCTTCTGGTTGCTTCCCCCATCATTCCTTCTCTTGTTAGCC
TCCTCAGGAGTTGAAGCAGGGGCAGGAACAGGTTGAACTGTGTATCCCCCACTCGCCGGAAATTTGGCCCACGCAGGGGC
CTCGGTTGATCTGACCATTTTTTCACTTCACCTGGCCGGTGTCTCCTCAATTCTTGGGGCAATCAATTTTATTACTACGA
TTATTAACATAAAACCCCCAGCTATCTCACAATATCAGACTCCTTTATTTGTATGGGCTGTGCTTATTACCGCCGTCCTA
CTCCTGCTTTCACTACCCGTTCT-AGCTGCTGGTATTACAATACTACTAACAGACCGAAACTTAAACACCACCTTTTTTG
ACCCTGCAGGGGGTGGANAC
>9026_5058|Chaetostoma.thomsoni|COI-5P
CTTTACTTAGTATTTGGTGCCTGGGCCGGAATGGTTGGCACAGCTCTCAGTCTTTTAATTCGGGCTGAGCTGAGCCAACC
CGGCTCTCTATTAGGCGATGACCAAATTTATAACGTCATCGTTACCGCACATGCCTTCGTAATAATTTTCTTTATGGTAA
TGCCAATTATAATTGGGGGCTTTGGAAACTGGCTAGTGCCACTAATAATTGGGGCCCCAGATATGGCCTTCCCACGAATG
AACAACATAAGCTTCTGATTGCTCCCCCCATCATTCCTTCTCTTGTTGGCCTCCTCAGGAGTTGAAGCAGGGGCAGGAAC
AGGTTGAACTGTATACCCCCCACTCGCCGGAAACTTGGCCCACGCAGGGGCCTCGGTTGATCTGACCATTTTTTCACTTC
ACCTGGCCGGTGTTTCCTCAATTCTTGGAGCAATCAATTTTATTACCACAATTATTAACATAAAACCCCCAGCTATCTCA
CAATACCAAACTCCTTTATTTGTGTGGGCTGTGCTTATTACCGCCGTCCTACTCCTGCTTTCACTACCCGTTCTAGCTGC
TGGCATTACAATACTGCTAACAGACCGAAACTTAAACACTACCTTCTTTGACCCTGCAGGGGGCGGAGACCCGATCCTCT
ATCAACACCTATT
>9027_5058|Chaetostoma.thomsoni|COI-5P
TATTTGGTGCCTGGGCCGGAATGGTTGGCACAGCTCTCAGTCTTTTAATTCGGGCTGAGCTGAGCCAACCCGGCTCTCTA
TTAGGCGATGACCAAATTTATAACGTCATCGTTACCGCACATGCCTTCGTAATAATTTTCTTTATGGTAATGCCAATTAT
AATTGGGGGCTTTGGAAACTGGCTAGTGCCACTAATAATTGGGGCCCCAGATATGGCCTTCCCACGAATGAACAACATAA
GCTTCTGATTGCTCCCCCCATCATTCCTTCTCTTGTTGGCCTCCTCAGGAGTTGAAGCAGGGGCAGGAACAGGTTGAACT
GTATACCCCCCACTCGCCGGAAACTTGGCCCACGCAGGGGCCTCGGTTGATCTGACCATTTTTTCACTTCACCTGGCCGG
TGTTTCCTCAATTCTTGGAGCAATCAATTTTATTACCACAATTATTAACATAAAACCCCCAGCTATCTCACAATACCAAA
CTCCTTTATTTGTGTGGGCTGTGCTTATTACCGCCGTCCTACTCCTGCTTTCACTACCCGTTCTAGCTGCTGGCATTACA
ATACTGCTAACAGACCGAAACTTAAACACTACCTTCTTTGACCCTGCAGGGGGCGGAGACCCGATCCTCTATCAACACCT
ATT
>9028_5058|Chaetostoma.thomsoni|COI-5P
GAATGGTTGGCACAGCTCTCAGTCTTTTAATTCGGGCTGAGCTGAGCCAACCCGGCTCTCTATTAGGCGATGACCAAATT
TATAACGTCATCGTTACCGCACATGCCTTCGTAATAATTTTCTTTATGGTAATGCCAATTATAATTGGGGGCTTTGGAAA
CTGGCTAGTGCCACTAATAATTGGGGCCCCAGATATGGCCTTCCCACGAATGAACAACATAAGCTTCTGATTGCTCCCCC
CATCATTCCTTCTCTTGTTGGCCTCCTCAGGAGTTGAAGCAGGGGCAGGAACAGGTTGAACTGTATACCCCCCACTCGCC
GGAAACTTGGCCCACGCAGGGGCCTCGGTTGATCTGACCATTTTTTCACTTCACCTGGCCGGTGTTTCCTCAATTCTTGG
AGCAATCAATTTTATTACCACAATTATTAACATAAAACCCCCAGCTATCTCACAATACCAAACTCCTTTATTTGTGTGGG
CTGTGCTTATTACCGCCGTCCTACTCCTGCTTTCACTACCCGTTCTAGCTGCTGGCATTACAATACTGCTAACAGACCGA
AACTTAAACACTACCTTCTTTGACCCTGCAGGGGGCGGAGACCCGATCCTCTATCAACACCTATTC
>9042_5062|Chaetostoma.thomsoni|COI-5P
CCTTTACTTAGTATTTGGTGCCTGGGCCGGAATGGTTGGCACAGCTCTCAGTCTTTTAATTCGGGCTGAGCTGAGCCAAC
CCGGCTCTCTATTAGGCGATGACCAAATTTATAACGTCATCGTTACCGCACATGCCTTCGTAATAATTTTCTTTATGGTA
ATGCCAATTATAATTGGGGGCTTTGGAAACTGGCTAGTGCCACTAATAATTGGGGCCCCAGATATGGCCTTCCCACGAAT
GAACAACATAAGCTTCTGATTGCTCCCCCCATCATTCCTTCTCTTGTTGGCCTCCTCAGGAGTTGAAGCAGGGGCAGGAA
CAGGTTGAACTGTATACCCCCCACTCGCCGGAAACTTGGCCCACGCAGGGGCCTCGGTTGATCTGACCATTTTTTCACTT
CACCTGGCCGGTGTTTCCTCAATTCTTGGAGCAATCAATTTTATTACCACAATTATTAACATAAAACCCCCAGCTATCTC
ACAATACCAAACTCCTTTATTTGTGTGGGCTGTGCTTATTACCGCCGTCCTACTCCTGCTTTCACTACCCGTTCTAGCTG
CTGGCATTACAATACTGCTAACAGACCGAAACTTAAACACTACCTTCTTTGACCCTGCAGGGGGCGGAGACCCGATCCTC
TATCAACACCTAT
>9043_5062|Chaetostoma.thomsoni|COI-5P
CTTTACTTAGTATTTGGTGCCTGGGCCGGAATGGTTGGCACAGCTCTCAGTCTTTTAATTCGGGCTGAGCTGAGCCAACC
CGGCTCTCTATTAGGCGATGACCAAATTTATAACGTCATCGTTACCGCACATGCCTTCGTAATAATTTTCTTTATGGTAA
TGCCAATTATAATTGGGGGCTTTGGAAACTGGCTAGTGCCACTAATAATTGGGGCCCCAGATATGGCCTTCCCACGAATG
AACAACATAAGCTTCTGATTGCTCCCCCCATCATTCCTTCTCTTGTTGGCCTCCTCAGGAGTTGAAGCAGGGGCAGGAAC
AGGTTGAACTGTATACCCCCCACTCGCCGGAAACTTGGCCCACGCAGGGGCCTCGGTTGATCTGACCATTTTTTCACTTC
ACCTGGCCGGTGTTTCCTCAATTCTTGGAGCAATCAATTTTATTACCACAATTATTAACATAAAACCCCCAGCTATCTCA
CAATACCAAACTCCTTTATTTGTGTGGGCTGTGCTTATTACCGCCGTCCTACTCCTGCTTTCACTACCCGTTCTAGCTGC
TGGCATTACAATACTGCTAACAGACCGAAACTTAAACACTACCTTCTTTGACCCTGCAGGGGGCGGAGACCCGATCCTCT
ATCAACACCTATT
>9044_5062|Chaetostoma.thomsoni|COI-5P
ACTTAGTATTTGGTGCCTGGGCCGGAATGGTTGGCACAGCTCTCAGTCTTTTAATTCGGGCTGAGCTGAGCCAACCCGGC
TCTCTATTAGGCGATGACCAAATTTATAACGTCATCGTTACCGCACATGCCTTCGTAATAATTTTCTTTATGGTAATGCC
AATTATAATTGGGGGCTTTGGAAACTGGCTAGTGCCACTAATAATTGGGGCCCCAGATATGGCCTTCCCACGAATGAACA
ACATAAGCTTCTGATTGCTCCCCCCATCATTCCTTCTCTTGTTGGCCTCCTCAGGAGTTGAAGCAGGGGCAGGAACAGGT
TGAACTGTATACCCCCCACTCGCCGGAAACTTGGCCCACGCAGGGGCCTCGGTTGATCTGACCATTTTTTCACTTCACCT
GGCCGGTGTTTCCTCAATTCTTGGAGCAATCAATTTTATTACCACAATTATTAACATAAAACCCCCAGCTATCTCACAAT
ACCAAACTCCTTTATTTGTGTGGGCTGTGCTTATTACCGCCGTCCTACTCCTGCTTTCACTACCCGTTCTAGCTGCTGGC
ATTACAATACTGCTAACAGACCGAAACTTAAACACTACCTTCTTTGACCCTGCAGGGGGCGGAGACCCGATCCTCTATCA
ACACCTA
>9011_5053|Chaetostoma.thomsoni|COI-5P
TATTTGGTGCCTGAGCCGGTATGGTAGGCACAGCTCTTAGTCTTTTAATTCGGGCTGAGCTGAGCCAACCAGGCTCTCTA
TTAGGCGATGATCAAATTTATAACGTCATCGTTACCGCACATGCCTTCGTAATAATTTTCTTTATGGTAATGCCAATTAT
AATCGGGGGCTTTGGAAACTGGCTAGTGCCACTAATAATTGGGGCCCCAGATATGGCCTTCCCCCGAATAAACAACATAA
GCTTCTGATTGCTCCCTCCATCATTCCTTCTCTTGTTGGCCTCCTCAGGGGTCGAAGCAGGGGCAGGAACAGGTTGAACT
GTATATCCCCCACTCGCCGGAAACTTGGCCCACGCAGGGGCCTCGGTTGATCTGACCATTTTTTCACTTCACCTGGCTGG
TGTCTCCTCAATTCTAGGGGCAATCAATTTTATTACCACGATTATTAACATAAAACCCCCAGCCATCTCACAATACCAAA
CTCCTTTATTTGTGTGGGCTGTGCTTATTACCGCCGTCCTACTCCTGCTTTCACTACCCGTTCTAGCTGCTGGCATTACA
ATACTGCTAACAGACCGAAACTTAAACACTACCTTCTTTGATCCTGCAGGAGGTGGAGACCCGATTCTCTATCAGCACTT
ATTC
>5280E_5280|Chaetostoma.thomsoni|COI-5P
CCTTTACTTAGTATTTGGTGCCTGAGCCGGAATGGTTGGTACAGCTCTCAGCCTTTTAATTCGGGCTGAACTGAGCCAAC
CCGGCTCTCTATTAGGTGACGATCAAATCTATAATGTCATCGTTACCGCACATGCTTTCGTAATAATTTTCTTTATAGTA
ATACCAATTATGATCGGGGGTTTCGGAAATTGACTAGTGCCTCTGATAATTGGAGCCCCAGATATAGCCTTCCCCCGAAT
GAACAACATAAGCTTCTGATTACTTCCCCCATCATTCCTTCTCTTATTAGCCTCTTCAGGAGTTGAAGCAGGGGCAGGAA
CAGGTTGAACTGTATATCCCCCACTCGCCGGAAACCTAGCCCATGCAGGGGCCTCAGTTGACCTGACCATCTTTTCACTT
CACTTAGCGGGTGTCTCCTCAATTCTCGGGGCAATTAACTTTATTACTACGATTATCAACATAAAACCCCCAGCTATCTC
ACAATACCAGACCCCTTTATTTGTGTGAGCTGTGCTTATTACCGCCGTCTTACTCCTGCTCTCTCTACCTGTCTTAGCTG
CTGGCATTACAATATTGCTAACAGACCGAAACTTAAATACCACTTTCTTTGACCCTGCAGGAGGCGGAGACCCAATCCTC
TACCAGCA
>5280D_5280|Chaetostoma.thomsoni|COI-5P
CTTTTAATTCGGGCTGAACTGAGCCAACCCGGCTCTCTATTAGGTGACGATCAAATCTATAATGTCATCGTTACCGCACA
TGCTTTCGTAATAATTTTCTTTATAGTAATACCAATTATGATCGGGGGTTTCGGAAATTGACTAGTGCCTCTGATAATTG
GAGCCCCAGATATAGCCTTCCCCCGAATGAACAACATAAGCTTCTGATTACTTCCCCCATCATTCCTTCTCTTATTAGCC
TCTTCAGGAGTTGAAGCAGGGGCAGGAACAGGTTGAACTGTATATCCCCCACTCGCCGGAAACCTAGCCCATGCAGGGGC
CTCAGTTGACCTGACCATCTTTTCACTTCACTTAGCGGGTGTCTCCTCAATTCTCGGGGCAATTAACTTTATTACTACGA
TTATCAACATAAAACCCCCAGCTATCTCACAATACCAGACCCCTTTATTTGTGTGAGCTGTGCTTATTACCGCCGTCTTA
CTCCTGCTCTCTCTACCTGTCTT-AGCTGCTGGCATTACAATATTGCTAACAGACCGAAACTTAAATACCACTTTCTTTG
ACCCTGCAGGAGGCGGAGAC
>5322A_5322|Chaetostoma.thomsoni|COI-5P
CTTTTAATTCGGGCTGAACTGAGCCAACCCGGCTCTCTATTAGGTGACGATCAAATCTATAATGTCATCGTTACCGCACA
TGCTTTCGTAATAATTTTCTTTATAGTAATACCAATTATGATCGGGGGTTTCGGAAATTGACTAGTGCCTCTGATAATTG
GAGCCCCAGATATAGCCTTCCCCCGAATGAACAACATAAGCTTCTGATTACTTCCCCCATCATTCCTTCTCTTATTAGCC
TCTTCAGGAGTTGAAGCAGGGGCAGGAACAGGTTGAACTGTATATCCCCCACTCGCCGGAAACCTAGCCCATGCAGGGGC
CTCAGTTGACCTGACCATCTTTTCACTTCACTTAGCGGGTGTCTCCTCAATTCTCGGGGCAATTAACTTTATTACTACGA
TTATCAACATAAAACCCCCAGCTATCTCACAATACCAGACCCCTTTATTTGTGTGAGCTGTGCTTATTACCGCCGTCTTA
CTCCTGCTCTCTCTACCTGTCTT-AGCTGCTGGCATTACAATATTGCTAACAGACCGAAACTTAAATACCACTTTCTTTG
ACCCTGCAGGAGGCGGAGAC
>5322C_5322|Chaetostoma.thomsoni|COI-5P
CCTTTACTTAGTATTTGGTGCCTGAGCCGGAATGGTTGGTACAGCTCTCAGCCTTTTAATTCGGGCTGAACTGAGCCAAC
CCGGCTCTCTATTAGGTGACGATCAAATCTATAATGTCATCGTTACCGCACATGCTTTCGTAATAATTTTCTTTATAGTA
ATACCAATTATGATCGGGGGTTTCGGAAATTGACTAGTGCCTCTGATAATTGGAGCCCCAGATATAGCCTTCCCCCGAAT
GAACAACATAAGCTTCTGATTACTTCCCCCATCATTCCTTCTCTTATTAGCCTCTTCAGGAGTTGAAGCAGGGGCAGGAA
CAGGTTGAACTGTATATCCCCCACTCGCCGGAAACCTAGCCCATGCAGGGGCCTCAGTTGACCTGACCATCTTTTCACTT
CACTTAGCGGGTGTCTCCTCAATTCTCGGGGCAATTAACTTTATTACTACGATTATCAACATAAAACCCCCAGCTATCTC
ACAATACCAGACCCCTTTATTTGTGTGAGCTGTGCTTATTACCGCCGTCTTACTCCTGCTCTCTCTACCTGTCTTAGCTG
CTGGCATTACAATATTGCTAACAGACCGAAACTTAAATACCACTTTCTTTGACCCTGCAGGAGGCGGAGACCCAATCCTC
TACCAGCAC
>5322D_5322|Chaetostoma.thomsoni|COI-5P
CTTTTAATTCGGGCTGAACTGAGCCAACCCGGCTCTCTATTAGGTGACGATCAAATCTATAATGTCATCGTTACCGCACA
TGCTTTCGTAATAATTTTCTTTATAGTAATACCAATTATGATCGGGGGTTTCGGAAATTGACTAGTGCCTCTGATAATTG
GAGCCCCAGATATAGCCTTCCCACGAATGAACAACATAAGCTTCTGATTACTTCCCCCATCATTCCTTCTCTTATTAGCC
TCTTCAGGAGTTGAAGCAGGGGCAGGAACAGGTTGAACTGTATATCCCCCACTCGCCGGAAACCTAGCCCATGCAGGGGC
CTCAGTTGACCTGACCATCTTTTCACTTCACTTAGCGGGTGTCTCCTCAATTCTCGGGGCAATTAACTTTATTACTACGA
TTATCAACATAAAACCCCCAGCTATCTCACAATACCAGACCCCTTTATTTGTGTGAGCTGTGCTTATTACCGCCGTCTTA
CTCCTGCTCTCTCTACCTGTCTT-AGCTGCTGGCATTACAATATTGCTAACAGACCGAAACTTAAATACCACTTTCTTTG
ACCCTGCAGGAGGCGGAGAC
>5864C_5864|Pimelodus.grosskopfii|COI-5P
CTCATGCCTTCGTAATAATTTTCTTCATAGTAATACCAATCATGATTGGGGGATTCGGAAACTGATTAATCCCACTAATG
ATTGGAGCACCAGATATGGCATTCCCACGAATAAATAACATAAGCTTCTGACTTCTACCCCCATCGTTCCTCCTCCTCCT
TGCCTCATCAGGTGTAGAAGCTGGAGCAGGGACAGGATGAACTGTATACCCCCCTCTCGCCGGAAACCTTGCACACGCAG
GCGCTTCTGTAGACCTAACCATTTTCTCCCTACACCTAGCAGGGGTTTCATCTATCTTAGGAGCTATTAACTTTATTACA
ACAATTATCAATATGAAACCCCCAGCCATCTCACAATACCAAACACCATTGTTTGTATGGTCAGTCTTAATTACAGCAGT
ACTACTTCTACTATCACTACCAGTACTGGCCGCAGGCATTACAATGTTATTAACGGACCGAAACTTAAACACAACATTCT
TTGACCCAGCAGGAGGAGGAGACCCAATCCTTTACCAACATTTATT
>6435_6435|Rhamdia.guatemalensis|COI-5P
CTCATGCCTTCGTAATAATTTTCTTTATAGTAATACCCATTATGATCGGAGGGTTTGGAAACTGACTTGTACCATTAATG
ATTGGTGCCCCAGACATAGCCTTCCCCCGAATGAATAACATAAGCTTTTGACTCCTTCCCCCATCATTTCTTCTTCTGCT
TGCCTCATCTGGCGTAGAAGCAGGGGTTGGAACAGGCTGAACTGTCTATCCGCCCCTTGCCGGAAATCTGGCACACGCTG
GAGCTTCCGTTGACCTTGCTATCTTCTCCCTTCACCTTGCAGGTGTGTCCTCCATTCTAGGGGCAATTAATTTTATTACA
ACCATTATTAACATGAAACCGCCAGCCATTTCGCAATACCAAACACCGCTGTTTGTATGAGCTATTCTAATTACCGCAGT
ACTTCTTCTGCTCTCCCTCCCAGTTCTAGCCGCCGGAATTACAATACTTCTGACGGACCGAAACTTAAATACCACCTTCT
TTGACCCAGCAGGCGGAGGTGATCTATTCTCTATCAACATCTATT
>6037A_6037|Cordylancistrus.pijao|COI-5P
NNNNNNNNNNNNNNNNNNNNNNNNNNNNNNNNNNNNNNNNNNNNNNNNNNNNNNNNNNNNNNNNNNNNNNNNNNNNCACA
TGCTTTCGTAATAATTTTCTTTATAGTAATACCAATTATGATCGGGGGTTTCGGAAATTGACTAGTACCTCTGATAATTG
GAGCTCCAGATATAGCCTTCCCCCGAATGAATAACATAAGCTTCTGATTACTTCCCCCATCATTCCTTCTCTTGTTAGCC
TCTTCAGGAGTTGAAGCAGGGGCAGGAACAGGTTGAACTGTATACCCCCCACTCGCCGGAAACCTAGCCCATGCAGGGGC
CTCAGTTGACCTGACCATCTTTTCTCTTCACTTAGCGGGTGTCTCCTCAATTCTTGGGGCAATTAACTTTATTACTACTA
TTATCAACATAAAACCCCCAGCTATCTCACAATACCAGACCCCTTTATTTGTATGAGCTGTGCTAATCACCGCCGTCTTA
CTCCTGCTCTCTCTACCTGTCCT-AGCTGCTGGCATTACAATATTGCTAACAGACCGAAACTTAAACACCACCTTCTTTG
ACCCTGCAGGAGGCGGAGAC
>6037B_6037|Cordylancistrus.pijao|COI-5P
NNNNNNNNNNNNNNNNNNNNNNNNNNNNNNNNNNNNNNNNNNNNNNNNNNNNNNNNNNNNNNNNNNNNNNNNNNNNCACA
TGCTTTCGTAATAATTTTCTTTATAGTAATACCAATTATGATCGGGGGTTTCGGAAATTGACTAGTACCTCTGATAATTG
GAGCTCCAGATATAGCCTTCCCCCGAATGAATAACATAAGCTTCTGATTACTTCCCCCATCATTCCTTCTCTTGTTAGCC
TCTTCAGGAGTTGAAGCAGGGGCAGGAACAGGTTGAACTGTATACCCCCCACTCGCCGGAAACCTAGCCCATGCAGGGGC
CTCAGTTGACCTGACCATCTTTTCTCTTCACTTAGCGGGTGTCTCCTCAATTCTTGGGGCAATTAACTTTATTACTACTA
TTATCAACATAAAACCCCCAGCTATCTCACAATACCAGACCCCTTTATTTGTATGAGCTGTGCTAATCACCGCCGTCTTA
CTCCTGCTCTCTCTACCTGTCCT-AGCTGCTGGCATTACAATATTGCTAACAGACCGAAACTTAAACACCACCTTCTTTG
ACCCTGCAGGAGGCGGAGAC
>8255_3668|Pseudopimelodus.sp|COI-5P
GACATTGGCACCCTCTACCTAGTGTTTGGTGCCTGGGCCGGAATAGTTGGTACAGCCCTTAGCCTTCTAATTCGAGCAGAGCTAGCCCAACCCGGCGCCCTTTTAGGCGACGATCAAATTTATAATGTCATCGTCACTGCTCACGCTTTCGTAATAATCTTCTTTATAGTAATACCCATTATGATTGGGGGCTTTGGGAACTGACTTATCCCACTAATAATTGGTGCACCAGACATGGCATTCCCACGAATAAACAATATGAGTTTCTGATTACTCCCGCCCTCCTTTCTACTACTGCTTTCCTCATCTGGGGTAGAAGCTGGGGTAGGAACAGGATGAACTGTTTATCCCCCCCTCGCCGGAAACCTAGCACATGCAGGAGCTTCCGTAGATCTAGCTATTTTTTCCCTCCACCTTGCCGGGGTGTCATCCATTCTGGGAGCCATTAACTTTATTACAACTATTATTAACATAAAACCCCCAGCCATCTCACAATATCAAACGCCCCTATTTGTATGAGCCACCCTAATTACAGCAGTACTATTATTACTATCACTCCCTGTCCTAGCTGCTGGTATTACAATATTACTAACGGACCGAAATTTAAATACTACATTCTTCGACCCCGCAGGAGGAGGAGACCCAATTCTTTACCAACACCTATTCTGATTCTTT
>8256_3668|Pseudopimelodus.sp|COI-5P
TAGTTGGTACAGCCCTTAGCCTTCTAATTCGAGCAGAGCTAGCCCAACCCGGCGCCCTTTTAGGCGACGATCAAATTTATAATGTCATCGTCACTGCTCACGCTTTCGTAATAATCTTCTTTATAGTAATACCCATTATGATTGGGGGCTTTGGGAACTGACTTATCCCACTAATAATTGGTGCACCAGACATGGCATTCCCACGAATAAACAATATGAGTTTCTGATTACTCCCGCCCTCCTTTCTACTACTGCTTTCCTCATCTGGGGTAGAAGCTGGGGTAGGAACAGGATGAACTGTTTATCCCCCCCTCGCCGGAAACCTAGCACATGCAGGAGCTTCCGTAGATCTAGCTATTTTTTCCCTCCACCTTGCCGGGGTGTCATCCATTCTGGGAGCCATTAACTTTATTACAACTATTATTAACATAAAACCCCCAGCCATCTCACAATATCAAACGCCCCTATTTGTATGAGCCACCCTAATTACAGCAGTACTATTATTACTATCACTCCCTGTCCTAGCTGCTGGTATTACAATATTACTAACGGACCGAAATTTAAATACTACATTCTTCGACCCCGCAGGAGGAGGAGACCCAATTCTTTACCAACACCTATTCTGATTCTTTGCCCCCC
>5294A_5294|Lasiancistrus.caucanus|COI-5P
CTCTTAATCCGAGCTGAGCTAAGCCAACCCGGCTCTCTATTAGGTGACGACCAAATCTATAACGTCATCGTCACCGCGCA
TGCCTTCGTAATAATTTTCTTTATGGTAATACCAATTATGATTGGAGGCTTTGGAAACTGGCTAGTACCCCTAATAATTG
GAGCACCTGATATAGCCTTCCCACGGATAAATAATATAAGCTTCTGACTACTCCCCCCATCATTCCTTCTCCTATTAGCC
TCTTCAGGAGTGGAAGCAGGGGCTGGCACAGGTTGAACCGTATATCCCCCCCTCGCTGGAAATCTAGCCCATGCAGGGGC
TTCAGTAGACCTAACCATCTTTTCACTTCACTTGGCAGGTGTCTCTTCAATTCTTGGAGCAATTAACTTTATTACTACAA
TTATTAACATGAAACCCCCAGCTATTTCACAATACCAGACTCCCCTATTTGTATGGGCTGTACTTATTACAGCTGTCCTA
CTTCTGCTCTCACTACCCGTTTT-AGCTGCCGGCATTACAATACTGCTAACAGACCGAAACCTAAACACTACATTCTTCG
ACCCTGCAGGCGGTGGAGAT
>5294B_5294|Lasiancistrus.caucanus|COI-5P
CCTTTACTTAGTGTTTGGTGCCTGAGCCGGAATGGTTGGTACAGCTCTTAGTCTCTTAATCCGAGCTGAGCTAAGCCAAC
CCGGCTCTCTATTAGGTGACGACCAAATCTATAACGTCATCGTCACCGCGCATGCCTTCGTAATAATTTTCTTTATGGTA
ATACCAATTATGATTGGAGGCTTTGGAAACTGGCTAGTACCCCTAATAATTGGAGCACCTGATATAGCCTTCCCACGGAT
AAATAATATAAGCTTCTGACTACTCCCCCCATCATTCCTTCTCCTATTAGCCTCTTCAGGAGTGGAAGCAGGGGCTGGCA
CAGGTTGAACCGTATATCCCCCCCTCGCTGGAAATCTAGCCCATGCAGGGGCTTCAGTAGACCTAACCATCTTTTCACTT
CACTTGGCAGGTGTCTCTTCAATTCTTGGAGCAATTAACTTTATTACTACAATTATTAACATGAAACCCCCAGCTATTTC
ACAATACCAGACTCCCCTATTTGTATGGGCTGTACTTATTACAGCTGTCCTACTTCTGCTCTCACTACCCGTTTTAGCTG
CCGGCATTACAATACTGCTAACAGACCGAAACCTAAACACTACATTCTTCGACCCTGCAGGCGGTGGAGATCCAATCCTT
TATCAACACTTT
>5294C_5294|Lasiancistrus.caucanus|COI-5P
CCTTTACTTAGTGTTTGGTGCCTGAGCCGGAATGGTTGGTACAGCTCTTAGTCTCTTAATCCGAGCTGAGCTAAGCCAAC
CCGGCTCTCTATTAGGTGACGACCAAATCTATAACGTCATCGTCACCGCGCATGCCTTCGTAATAATTTTCTTTATGGTA
ATACCAATTATGATTGGAGGCTTTGGAAACTGGCTAGTACCCCTAATAATTGGAGCACCTGATATAGCCTTCCCACGGAT
AAATAATATAAGCTTCTGACTACTCCCCCCATCATTCCTTCTCCTATTAGCCTCTTCAGGAGTGGAAGCAGGGGCTGGCA
CAGGTTGAACCGTATATCCCCCCCTCGCTGGAAATCTAGCCCATGCAGGGGCTTCAGTAGACCTAACCATCTTTTCACTT
CACTTGGCAGGTGTCTCTTCAATTCTTGGAGCAATTAACTTTATTACTACAATTATTAACATGAAACCCCCAGCTATTTC
ACAATACCAGACTCCCCTATTTGTATGGGCTGTACTTATTACAGCTGTCCTACTTCTGCTCTCACTACCCGTTTTAGCTG
CCGGCATTACAATACTGCTAACAGACCGAAACCTAAACACTACATTCTTCGACCCTGCAGGCGGTGGAGATCCAATCCTT
TATCAACACTTATT
>5294D_5294|Lasiancistrus.caucanus|COI-5P
CTCTTAATCCGAGCTGAGCTAAGCCAACCCGGCTCTCTATTAGGTGACGACCAAATCTATAACGTCATCGTCACCGCGCA
TGCCTTCGTAATAATTTTCTTTATGGTAATACCAATTATGATTGGAGGCTTTGGAAACTGGCTAGTACCCCTAATAATTG
GAGCACCTGATATAGCCTTCCCACGGATAAATAATATAAGCTTCTGACTACTCCCCCCATCATTCCTTCTCCTATTAGCC
TCTTCAGGAGTGGAAGCAGGGGCTGGCACAGGTTGAACCGTATATCCCCCCCTCGCTGGAAATCTAGCCCATGCAGGGGC
TTCAGTAGACCTAACCATCTTTTCACTTCACTTGGCAGGTGTCTCTTCAATTCTTGGAGCAATTAACTTTATTACTACAA
TTATTAACATGAAACCCCCAGCTATTTCACAATACCAGACTCCCCTATTTGTATGGGCTGTACTTATTACAGCTGTCCTA
CTTCTGCTCTCACTACCCGTTTT-AGCTGCCGGCATTACAATACTGCTAACAGACCGAAACCTAAACACTACATTCTTCG
ACCCTGCAGGCGGTGGAGAT
>8557_3913|Lasiancistrus.caucanus|COI-5P
CTCTTAATCCGAGCTGAGCTAAGCCAACCCGGCTCTCTATTAGGTGACGACCAAATCTATAACGTCATCGTCACCGCGCA
TGCCTTCGTAATAATTTTCTTTATGGTAATACCAATTATGATTGGAGGCTTTGGAAACTGGCTAGTACCCCTAATAATTG
GAGCACCTGATATAGCCTTCCCACGGATAAATAATATAAGCTTCTGACTACTCCCCCCATCATTCCTTCTCCTATTAGCC
TCTTCAGGAGTGGAAGCAGGGGCTGGCACAGGTTGAACCGTATATCCCCCCCTCGCTGGAAACCTAGCCCATGCAGGGGC
TTCAGTAGACCTAACCATCTTTTCACTTCACTTGGCAGGTGTCTCTTCAATTCTTGGAGCAATTAACTTTATTACTACAA
TTATTAACATGAAACCCCCAGCTATTTCACAATACCAGACTCCCCTATTTGTATGGGCTGTACTTATTACAGCTGTCCTA
CTTCTGCTCTCACTACCCGTTTT-AGCTGCCGGCATTACAATACTGCTAACAGACCGAAACCTAAACACTACATTCTTCG
ACCCTGCAGGCGGTGGAGAT
>8558_3913|Lasiancistrus.caucanus|COI-5P
CCTTTACTTAGTGTTTGGTGCCTGAGCCGGAATGGTTGGTACAGCTCTTAGTCTCTTAATCCGAGCTGAGCTAAGCCAAC
CCGGCTCTCTATTAGGTGACGACCAAATCTATAACGTCATCGTCACCGCGCATGCCTTCGTAATAATTTTCTTTATGGTA
ATACCAATTATGATTGGAGGCTTTGGAAACTGGCTAGTACCCCTAATAATTGGAGCACCTGATATAGCCTTCCCACGGAT
AAATAATATAAGCTTCTGACTACTCCCCCCATCATTCCTTCTCCTATTAGCCTCTTCAGGAGTGGAAGCAGGGGCTGGCA
CAGGTTGAACCGTATATCCCCCCCTCGCTGGAAACCTAGCCCATGCAGGGGCTTCAGTAGACCTAACCATCTTTTCACTT
CACTTGGCAGGTGTCTCTTCAATTCTTGGAGCAATTAACTTTATTACTACAATTATTAACATGAAACCCCCAGCTATTTC
ACAATACCAGACTCCCCTATTTGTATGGGCTGTACTTATTACAGCTGTCCTACTTCTGCTCTCACTACCCGTTTTAGCTG
CCGGCATTACAATACTGCTAACAGACCGAAACCTAAACACTACATTCTTCGACCCTGCAGGCGGTGGAGATCCAATCCTT
TATCAACACTTATTT
>8863_4834|Lasiancistrus.caucanus|COI-5P
CCTTTACTTAGTGTTTGGTGCCTGAGCCGGAATGGTTGGTACAGCTCTTAGTCTCCTAATCCGAGCTGAGCTAAGCCAAC
CCGGCTCTCTATTAGGTGACGACCAAATCTATAATGTTATCGTCACCGCACATGCCTTCGTAATAATCTTCTTTATGGTA
ATACCAATTATGATCGGAGGCTTTGGAAACTGGCTAGTACCCCTAATAATTGGGGCACCTGATATGGCCTTCCCGCGGAT
AAATAATATAAGCTTCTGACTACTCCCCCCATCATTCCTACTCCTATTAGCCTCTTCAGGAATTGAGGCAGGGGCTGGCA
CAGGTTGAACCGTGTATCCCCCCCTCGCCGGAAACCTAGCCCATGCAGGAGCTTCAGTAGACCTAACCATCTTTTCACTT
CACTTAGCGGGTGTCTCTTCAATTCTTGGAGCAATTAACTTTATTACTACAATTATCAACATGAAACCCCCAGCTATTTC
ACAATACCAGACTCCCCTATTTGTATGGGCTGTACTTATTACAGCTGTCCTACTTCTGCTCTCACTACCCGTTTTAGCTG
CCGGCATTACAATACTGCTAACAGACCGAAACCTAAACACTACATTCTTCGACCCTGCAGGCGGTGGAGATCCAATCCTT
TATCAACACTTATTT
>8864_4834|Lasiancistrus.caucanus|COI-5P
CTCCTAATCCGAGCTGAGCTAAGCCAACCCGGCTCTCTATTAGGTGACGACCAAATCTATAATGTTATCGTCACCGCACA
TGCCTTCGTAATAATCTTCTTTATGGTAATACCAATTATGATCGGAGGCTTTGGAAACTGGCTAGTACCCCTAATAATTG
GGGCACCTGATATGGCCTTCCCGCGGATAAATAATATAAGCTTCTGACTACTCCCCCCATCATTCCTACTCCTATTAGCC
TCTTCAGGAATTGAGGCAGGGGCTGGCACAGGTTGAACCGTGTATCCCCCCCTCGCCGGAAACCTAGCCCATGCAGGAGC
TTCAGTAGACCTAACCATCTTTTCACTTCACTTAGCGGGTGTCTCTTCAATTCTTGGAGCAATTAACTTTATTACTACAA
TTATCAACATGAAACCCCCAGCTATTTCACAATACCAGACTCCCCTATTTGTATGGGCTGTACTTATTACAGCTGTCCTA
CTTCTGCTCTCACTACCCGTTTT-AGCTGCCGGCATTACAATACTGCTAACAGACCGAAACCTAAACACTACATTCTTCG
ACCCTGCAGGCGGTGGAGAT
>5430A_5430|Lasiancistrus.caucanus|COI-5P
CTCTTAATTCGAGCTGAGCTGAGCCAACCCGGCTCCCTTCTAGGTGACGACCAAATTTATAATGTCATCGTTACTGCACA
TGCCTTCGTAATAATCTTTTTTATAGTTATACCAATTATGATCGGGGGTTTCGGAAATTGACTAGTTCCCCTAATGATTG
GGGCACCTGATATAGCCTTCCCACGAATAAATAACATAAGCTTCTGACTCCTCCCACCATCATTTCTTCTCTTATTGGCT
TCTTCAGGAGTTGAAGCGGGGGCAGGAACAGGCTGAACTGTATACCCCCCGCTTGCTGGAAACCTAGCCCACGCAGGGGC
CTCAGTAGACCTGACTATCTTTTCACTTCACCTAGCCGGTGTATCTTCAATTTTAGGGGCTATTAATTTTATTACTACAA
TTATTAATATAAAACCCCCAGCCATCTCACAGTACCAAACTCCCCTATTTGTATGGGCTGTACTTATTACAGCAGTCCTA
CTCCTACTCTCCTTACCCGTTCT-GGCTGCTGGTATTACAATACTGCTAACAGATCGAAACCTAAACACCACATTCTTCG
ACCCTGCGGGGGGTGGAGAC
>5429A_5429|Sturisomatichthys.panamensis|COI-5P
CTGTTAATTCGGGCTGAACTAAGCCAACCCGGCTCCCTACTGGGTGATGACCAAATTTATAATGTAATCGTCACTGCACA
TGCTTTCGTAATAATTTTCTTTATAGTGATACCTATTATGATTGGAGGCTTTGGAAACTGACTAGTTCCACTAATAATTG
GAGCACCAGACATAGCATTCCCACGAATAAACAACATAAGCTTTTGACTACTACCCCCCTCATTTTTACTTTTGCTAGCC
TCCTCAGGAGTTGAAGCAGGAGCCGGAACAGGCTGAACAGTGTACCCCCCTCTTGCCGGAAATTTAGCCCACGCAGGAGC
TTCAGTCGACCTAACCATCTTCTCACTACACCTAGCAGGGGTCTCTTCTATCCTCGGAGCAATTAACTTCATCACTACAA
TTATTAACATGAAACCCCCAGCCATTTCACAATACCAAACCCCTTTATTCGTCTGGGCCGTATTAGTCACAGCCGTCCTG
CTTCTACTCTCTCTACCAGTTTT-AGCCGCCGGAATCACTATACTGTTAACGGACCGAAACCTAAACACTACCTTCTTTG
ACCCCGCAGGAGGTGGAGAT
>7488_2284|Spatuloricaria.gymnogaster|COI-5P
CTACTAATTCGAGCCGAACTAAGCCAACCAGGCTCATTATTAGGGGATGACCAAATCTACAATGTTATTGTTACTGCACA
TGCCTTCGTGATAATCTTCTTCATAGTAATGCCTATTATAATTGGAGGTTTCGGAAACTGATTAGTGCCCTTAATAATTG
GGGCACCAGACATAGCATTCCCCCGAATAAATAATATAAGCTTTTGACTACTTCCCCCCTCATTTCTGCTTCTTCTAGCC
TCATCAGGGGTAGAGGCAGGTGCTGGGACAGGCTGAACAGTATACCCTCCCCTGGCCGGAAACTTAGCCCATGCAGGAGC
TTCAGTCGATTTAACCATCTTCTCCCTACACTTGGCAGGAGTTTCATCCATCCTTGGGGCAATTAATTTTATTACCACAA
TTATTAATATAAAACCCCCGGCCATTTCACAATACCAAACCCCCCTATTTGTATGAGCTGTTCTAGTCACAGCCATCCTA
CTCCTCTTGTCTCTCCCAGTCTT-GGCTGCTGGAATTACCATACTATTAACAGACCGAAACCTAAATACCACCTTCTTTG
ACCCCGCAGGGGGAGGAGAC
>8160_3493|Spatuloricaria.gymnogaster|COI-5P
NNNNNNNNNNNNNNNNNNNNNNNNNNNNNNNNNTCATTATTAGGGGATGACCAAATCTACAATGTTATTGTTACTGCACA
TGCCTTCGTGATAATCTTCTTCATAGTAATGCCTATTATAATTGGAGGTTTCGGAAACTGATTAGTGCCCTTAATAATTG
GGGCACCAGACATAGCATTCCCCCGAATAAATAATATAAGCTTTTGACTTCTTCCCCCCTCATTTCTGCTTCTTCTAGCC
TCATCAGGGGTAGAGGCAGGTGCTGGGACAGGCTGAACAGTATACCCTCCCCTAGCCGGAAACTTAGCCCATGCAGGAGC
TTCAGTCGATTTAACCATCTTCTCCCTACACTTGGCAGGAGTTTCATCCATCCTTGGGGCAATTAATTTTATTACCACAA
TTATTAATATAAAACCCCCGGCCATTTCACAATACCAAACCCCCCTATTTGTATGAGCTGTTCTAGTCACAGCCATCCTA
CTCCTCTTGTCTCTCCCAGTCTT-GGCTGCTGGAATCACCATACTATTAACAGACCGAAACCTAAATACCACCTTCTTTG
ACCCCGCAGGGGGAGGAGAC
>8159_3493|Spatuloricaria.gymnogaster|COI-5P
CTACTAATTCGAGCCGAACTAAGCCAACCAGGCTCATTATTAGGGGATGACCAAATCTACAATGTTATTGTTACTGCACA
TGCCTTCGTGATAATCTTCTTCATAGTAATGCCTATTATAATTGGAGGTTTCGGAAACTGATTAGTGCCCTTAATAATTG
GGGCACCAGACATAGCATTCCCCCGAATAAATAATATAAGCTTTTGACTACTTCCCCCCTCATTTCTGCTTCTTCTAGCC
TCATCAGGGGTAGAGGCAGGTGCTGGGACAGGCTGAACAGTATACCCTCCCCTGGCCGGAAACTTAGCCCATGCAGGAGC
TTCAGTCGATTTAACCATCTTCTCCCTACACTTGGCAGGAGTTTCATCCATCCTTGGGGCAATTAATTTTATTACCACAA
TTATTAATATAAAACCCCCGGCCATTTCACAATACCAAACCCCCCTATTTGTATGAGCTGTTCTAGTCACAGCCATCCTA
CTCCTCTTGTCTCTCCCAGTCTT-GGCTGCTGGAATTACCATACTATTAACAGACCGAAACCTAAATACCACCTTCTTTG
ACCCCGCAGGGGGAGGAGAC
>8161_3493|Spatuloricaria.gymnogaster|COI-5P
CTACTAATTCGAGCCGAACTAAGCCAACCAGGCTCATTATTAGGGGATGACCAAATCTACAATGTTATTGTTACTGCACA
TGCCTTCGTGATAATCTTCTTCATAGTAATGCCTATTATAATTGGAGGTTTCGGAAACTGATTAGTGCCCTTAATAATTG
GGGCACCAGACATAGCATTCCCCCGAATAAATAATATAAGCTTTTGACTACTTCCCCCCTCATTTCTGCTTCTTCTAGCC
TCATCAGGGGTAGAGGCAGGTGCTGGGACAGGCTGAACAGTATACCCTCCCCTGGCCGGAAACTTAGCCCATGCAGGAGC
TTCAGTCGATTTAACCATCTTCTCCCTACACTTGGCAGGAGTTTCATCCATCCTTGGGGCAATTAATTTTATTACCACAA
TTATTAATATAAAACCCCCGGCCATTTCACAATACCAAACCCCCCTATTTGTATGAGCTGTTCTAGTCACAGCCATCCTA
CTCCTCTTGTCTCTCCCAGTCTT-GGCTGCTGGAATTACCATACTATTAACAGNNNNNNNNNNNNNNNNNNNNNNNNNNN
NNNNNNNNNNNNNNNNNNNN
>8170_3493|Spatuloricaria.gymnogaster|COI-5P
AGGGGATGACCAAATCTACAATGTTATTGTTACTGCACATGCCTTCGTGATAATCTTCTTCATAGTAATGCCTATTATAATTGGAGGTTTCGGAAACTGATTAGTGCCCTTAATAATTGGGGCACCAGACATAGCATTCCCCCGAATAAATAATATAAGCTTTTGACTGCTTCCCCCCTCATTTCTGCTTCTTCTAGCCTCATCAGGGGTAGAGGCAGGTGCTGGGACAGGCTGAACAGTATACCCTCCCCTAGCCGGAAACTTAGCCCATGCAGGAGCTTCAGTCGATTTAACCATCTTCTCCCTACACTTGGCAGGAGTTTCATCCATCCTTGGGGCAATTAATTTTATTACCACAATTATTAATATAAAACCCCCGGCCATTTCACAATATCAAACCCCCCTATTTGTATGAGCTGTCCTAGTCACAGCCATCCTACTCCTCTTGTCTCTCCCAGTCTTGGCTGCTGGAATTACCATACTATTAACAGACCGAAACCTAAATACCACCTTCTTTGACCCCGCAGGGGGAGGAGACCCCATCCTTTACCAACACCTATTTTGATTCTTTGGCC
>8198_3493|Spatuloricaria.gymnogaster|COI-5P
AAGACATTGGCACCCTTTACCTAGTATTTGGTGCATGAGCCGGAATAGTGGGCACAGCTCTTAGCCTACTAATTCGAGCCGAACTAAGCCAACCAGGCTCATTATTAGGGGATGACCAAATCTACAATGTTATTGTTACTGCACATGCCTTCGTGATAATCTTCTTCATAGTAATGCCTATTATAATTGGAGGTTTCGGAAACTGATTAGTGCCCTTAATAATTGGGGCACCAGACATAGCATTCCCCCGAATAAATAATATAAGCTTTTGACTACTTCCCCCCTCATTTCTGCTTCTTCTAGCCTCATCAGGGGTAGAGGCAGGTGCTGGGACAGGCTGAACAGTATACCCTCCCCTGGCCGGAAACTTAGCCCATGCAGGAGCTTCAGTCGATTTAACCATCTTCTCCCTACACTTGGCAGGAGTTTCATCCATCCTTGGGGCAATTAATTTTATTACCACAATTATTAATATAAAACCCCCGGCCATTTCACAATACCAAACCCCCCTATTTGTATGAGCTGTTCTAGTCACAGCCATCCTACTCCTCTTGTCTCTCCCAGTCTTGGCTGCTGGAATTACCATACTATTAACAGACCGAAACCTAAATACCACCTTCTTTGACCCCGCAGGGGGAGGAGACCCCATCCTTTACCAACACCTATTTTGATTC
>6634B_6634|Pimelodus.yuma|COI-5P
CTCATGCCTTCGTAATAATTTTCTTCATGGTAATACCAATCATGATTGGGGGATTTGGAAATTGATTAGTCCCACTAATA
ATTGGAGCACCAGACATGGCATTCCCACGAATAAATAATATAAGTTTCTGACTTCTCCCACCATCATTCCTTCTCCTGCT
TGCCTCCTCAGGAGTTGAAGCCGGAGCAGGAACAGGATGAACTGTATACCCCCCTCTCGCCGGAAACCTTGCACATGCAG
GGGCTTCTGTAGACCTAACTATTTTCTCCCTTCATCTAGCAGGGGTATCATCCATTCTAGGAGCCATTAACTTCATCACA
ACAATTATTAACATGAAGCCCCCAGCAATTTCACAATACCAAACACCACTATTTGTATGATCAGTCCTAATTACAGCAGT
CCTACTTTTACTATCACTCCCCGTACTGGCCGCAGGCATTACAATGTTATTAACAGACCGAAACCTAAACACAACCTTCT
TTGACCCGGCAGGAGGAGGAGACCCAATCCTTTATCAACACC
>6155C_6155|Loricariichthys.brunneus|COI-5P
CACACGCCTTCGTAATAATTTTCTTCATAGTAATACCCATTATGATTGGAGGCTTTGGAAACTGACTAATTCCTCTAATA
ATTGGAGCTCCCGACATAGCATTTCCACGAATAAACAATATGAGCTTCTGATTACTTCCCCCCTCATTTCTACTTCTACT
AGCCTCATCAGGAGTTGAAGCAGGGGCTGGAACGGGTTGAACTGTATACCCGCCCCTTGCTGGGAATCTGGCCCACGCAG
GGGCTTCAGTCGACCTAACTATCTTTTCCCTGCATTTAGCAGGTGTTTCATCCATCCTAGGGGCAATTAATTTCATCACC
ACAATTATTAATATAAAACCTCCAGCCATCTCACAATATCAAACCCCTTTATTCGTCTGAGCCCTATTAATCACAGCTGT
TTTACTTCTACTTTCTCTTCCAGTATTAGCTGCTGGAATTACGATACTACTAACAGACCGAAATCTGAATACCACATTCT
TCGACCCAGCGGGAGGAGGGGACCCCATCCTTTACCAACACCTATT
>6155D_6155|Loricariichthys.brunneus|COI-5P
CACACGCCTTCGTAATAATTTTCTTCATAGTAATACCCATTATGATTGGAGGCTTTGGAAACTGACTAATTCCTCTAATA
ATTGGAGCTCCCGACATAGCATTTCCACGAATAAACAATATGAGCTTCTGATTACTTCCCCCCTCATTTCTACTTCTACT
AGCCTCATCAGGAGTTGAAGCAGGGGCTGGAACGGGTTGAACTGTATACCCGCCCCTTGCTGGGAATCTGGCCCACGCAG
GGGCTTCAGTCGACCTAACTATCTTTTCCCTGCATTTAGCAGGTGTTTCATCCATCCTAGGGGCAATTAATTTCATCACC
ACAATTATTAATATAAAACCTCCAGCCATCTCACAATATCAAACCCCTTTATTCGTCTGAGCCCTATTAATCACAGCTGT
TTTACTTCTACTTTCTCTTCCAGTATTAGCTGCTGGAATTACGATACTACTAACAGACCGAAATCTGAATACCACATTCT
TCGACCCAGCGGGAGGAGGGGACCCCATCCTTTACCAACACCTATT
>6155E_6155|Loricariichthys.brunneus|COI-5P
NNNNNNNNNNNNNNNNNNNNNNNNNNNNNNNNNNNNNNNNNNNNNNNNNNNNNNNNNNNNNNNNNNNNNNNNNNNNCACA
CGCCTTCGTAATAATTTTCTTCATAGTAATACCCATTATGATTGGAGGCTTTGGAAACTGACTAATTCCTCTAATAATTG
GAGCTCCCGACATAGCATTTCCACGAATAAACAATATGAGCTTCTGATTACTTCCCCCCTCATTTCTACTTCTACTAGCC
TCATCAGGAGTTGAAGCAGGGGCTGGAACGGGTTGAACTGTATACCCGCCCCTTGCTGGGAATCTGGCCCACGCAGGGGC
TTCAGTCGACCTAACTATCTTTTCCCTGCATTTAGCAGGTGTTTCATCCATCCTAGGGGCAATTAATTTCATCACCACAA
TTATTAATATAAAACCTCCAGCCATCTCACAATATCAAACCCCTTTATTCGTCTGAGCCCTATTAATCACAGCTGTTTTA
CTTCTACTTTCTCTTCCAGTATT-AGCTGCTGGAATTACGATACTACTAACAGACCGAAATCTGAATACCACATTCTTCG
ACCCAGCGGGAGGAGGGGAC
>6155F_6155|Loricariichthys.brunneus|COI-5P
NNNNNNNNNNNNNNNNNNNNNNNNNNNNNNNNNNNNNNNNNNNNNNNNNNNNNNNNNNNNNNNNNNNNNNNNNNNNCACA
CGCCTTCGTAATAATTTTCTTCATAGTAATACCCATTATGATTGGAGGCTTTGGAAACTGACTAATTCCTCTAATAATTG
GAGCTCCCGACATAGCATTTCCACGAATAAACAATATGAGCTTCTGATTACTTCCCCCCTCATTTCTACTTCTACTAGCC
TCATCAGGAGTTGAAGCAGGGGCTGGAACGGGTTGAACTGTATACCCGCCCCTTGCTGGGAATCTGGCCCACGCAGGGGC
TTCAGTCGACCTAACTATCTTTTCCCTGCATTTAGCAGGTGTTTCATCCATCCTAGGGGCAATTAATTTCATCACCACAA
TTATTAATATAAAACCTCCAGCCATCTCACAATATCAAACCCCTTTATTCGTCTGAGCCCTATTAATCACAGCTGTTTTA
CTTCTACTTTCTCTTCCAGTATT-AGCTGCTGGAATTACGATACTACTAACAGACCGAAATCTGAATACCACATTCTTCG
ACCCAGCGGGAGGAGGGGAC
>6568A_6568|Dasyloricaria.filamentosa|COI-5P
CGAACTAAGCCAACCGGGCTCTTTATTAGGTGATGACCAAATTTATAATGTCATCGTTACCGCACATGCTTTCGTAATAA
TTTTCTTCATAGTAATACCCATCATAATTGGGGGCTTCGGAAACTGATTAATTCCTCTAATAATTGGAGCACCAGATATG
GCATTCCCACGAATAAACAACATAAGCTTCTGATTACTTCCTCCCTCATTTTTACTCTTACTAGCTTCATCAGGCGTTGA
AGCAGGGGCTGGAACAGGCTGAACTGTATACCCTCCCCTTGCAGGAAACTTGGCCCATGCAGGAGCCTCAGTTGACCTAA
CTATCTTTTCTCTGCACTTAGCGGGTGTGTCCTCCATCCTGGGAGCAATTAATTTTATTACCACAATTATTAACATAAAA
CCTCCAGCCATCTCACAATACCAAACCCCCTTATTCGTCTGAGCCTTACTAATTACAGCTGTCCTACTACTCCTATCCCT
CCCAGTGTTGGCCGCCGGAATTACAATACTACTAACAGATCGAAATCTAAATACTACTTTCTTTGACCCTGCCGGAGGRA
CCCAATCCTCTACCAACACCTATTCTGATTCTTTGG
>6568D_6568|Dasyloricaria.filamentosa|COI-5P
CTAATTCGGGCCGAACTAAGCCAACCGGGCTCTTTATTAGGTGATGACCAAATTTATAATGTCATCGTTACCGCACATGC
TTTCGTAATAATTTTCTTCATAGTAATACCCATCATAATTGGGGGCTTCGGAAACTGATTAATTCCTCTAATAATTGGAG
CACCAGATATGGCATTCCCACGAATAAACAACATAAGCTTCTGATTACTTCCTCCCTCATTTTTACTCTTACTAGCTTCA
TCAGGCGTTGAAGCAGGGGCTGGAACAGGCTGAACTGTATACCCTCCCCTTGCAGGAAACTTGGCCCATGCAGGAGCCTC
AGTTGACCTAACTATCTTTTCTCTGCACTTAGCGGGTGTGTCCTCCATCCTGGGAGCAATTAATTTTATTACCACAATTA
TTAACATAAAACCTCCAGCCATCTCACAATACCAAACCCCCTTATTCGTCTGAGCCTTACTAATTACAGCTGTCCTACTA
CTCCTATCCCTCCCAGTGTTGGCCGCCGGAATTACAATACTACTAACAGATCGAAATCTAAATACTACTTTCTTTGACCC
TGCCGGAGGAGGAGACCCAATCCTCTACCAACACCTATT
>6568C_6568|Dasyloricaria.filamentosa|COI-5P
CTCTTAGCCTACTAATTCGGGCCGAACTAAGCCAACCGGGCTCTTTATTAGGTGATGACCAAATTTATAATGTCATCGTT
ACCGCACATGCTTTCGTAATAATTTTCTTCATAGTAATACCCATTATAATTGGGGGCTTCGGAAACTGATTAATTCCTCT
AATAATTGGAGCACCAGATATGGCATTCCCACGAATAAACAACATAAGCTTCTGATTACTTCCTCCCTCATTTTTACTCT
TACTAGCTTCATCAGGCGTTGAAGCAGGGGCTGGAACAGGCTGAACTGTATACCCTCCCCTTGCAGGAAACTTGGCCCAT
GCAGGAGCCTCAGTTGACCTAACTATCTTTTCTCTGCACTTAGCGGGTGTGTCCTCCATCCTGGGAGCAATTAATTTTAT
TACCACAATTATTAACATAAAACCTCCAGCCATCTCACAATACCAAACCCCCTTATTCGTCTGAGCCTTACTAATTACAG
CTGTCCTACTACTCCTATCCCTCCCAGTGTTGGCCGCCGGAATTACAATACTACTAACAGATCGAAATCTAAATACTACT
TTCTTTGACCCT
>6568B_6568|Dasyloricaria.filamentosa|COI-5P
CTGCTAATTCGGGCCGAACTAAGCCAACCGGGCTCTTTATTAGGTGATGACCAAATTTATAATGTCATCGTTACCGCACA
TGCTTTCGTAATAATTTTCTTCATAGTAATACCCATCATAATTGGGGGCTTCGGAAACTGATTAATTCCTCTAATAATTG
GAGCACCAGATATGGCATTCCCACGAATAAACAACATAAGCTTCTGATTACTTCCTCCCTCATTTTTACTCTTACTAGCT
TCATCAGGCGTTGAAGCAGGGGCTGGAACAGGCTGAACTGTATACCCTCCCCTTGCAGGAAACTTGGCCCATGCAGGAGC
CTCAGTTGACCTAACTATCTTTTCTCTGCACTTAGCGGGTGTGTCCTCCATCCTGGGAGCAATTAATTTTATTACCACAA
TTATTAACATAAAACCTCCAGCCATCTCACAATACCAAACCCCCTTATTCGTCTGAGCCTTACTAATTACAGCTGTCCTA
CTACTCCTATCCCTCCCAGTGTT-GGCCGCCGGAATTACAATACTACTAACAGATCGAAATCTAAATACTACTTTCTTTG
ACCCTGCCGGAGGAGGAGAC
>6234A_6234|Dasyloricaria.filamentosa|COI-5P
AGCTCTTAGCCTACTAATTCGGGCCGAACTAAGCCAACCGGGCTCTTTATTAGGTGATGACCAAATTTATAATGTCATCG
TTACCGCACATGCTTTCGTAATAATTTTCTTCATAGTAATACCCATCATAATTGGGGGCTTCGGAAACTGATTAATTCCT
CTAATAATTGGAGCACCAGATATGGCATTCCCACGAATAAACAACATAAGCTTCTGATTACTTCCTCCCTCATTTTTACT
CTTACTAGCTTCATCAGGCGTTGAAGCAGGGGCTGGAACAGGCTGAACTGTATACCCTCCCCTTGCAGGAAACTTGGCCC
ATGCAGGAGCCTCAGTTGACCTAACTATCTTTTCTCTGCACTTAGCGGGTGTGTCCTCCATCCTGGGAGCAATTAATTTT
ATTACCACAATTATTAACATAAAACCTCCAGCCATCTCACAATACCAAACCCCCTTATTCGTCTGAGCCTTACTAATTAC
AGCTGTCCTACTACTCCTATCCCTCCCAGTGTTGGCCGCCGGAATTACAATACTACTAACAGATCGAAATCTAAATACTA
CTTTCTTTGACCCTGCCGGAGGAGGAGACCCAATCCTCTACCAACACCTAT
>6234B_6234|Dasyloricaria.filamentosa|COI-5P
CTACTAATTCGGGCCGAACTAAGCCAACCGGGCTCTTTATTAGGTGATGACCAAATTTATAATGTCATCGTTACCGCACA
TGCTTTCGTAATAATTTTCTTCATAGTAATACCCATCATAATTGGGGGCTTCGGAAACTGATTAATTCCTCTAATAATTG
GAGCACCAGATATGGCATTCCCACGAATAAATAACATAAGCTTCTGATTACTTCCTCCCTCATTTTTACTCTTACTAGCT
TCATCAGGCGTTGAAGCAGGGGCTGGAACAGGCTGAACTGTATACCCCCCACTTGCAGGAAACTTGGCCCATGCAGGAGC
CTCAGTTGACCTAACTATCTTTTCTCTGCACTTAGCGGGTGTGTCCTCCATCCTGGGAGCAATTAATTTTATTACCACAA
TTATTAACATAAAACCTCCAGCCATCTCACAATACCAAACCCCCTTATTCGTCTGAGCCTTACTAATTACAGCTGTSCTA
CTACTCCTATCCCTCCCAGTGTT-GGCCGCCGGAATTACAATACTACTAACAGATCGAAATCTAAATACTACTTTCTTTG
ACCCTGCCGGAGGAGGAGAC
>6119E_6119|Trachelyopterus.insignis|COI-5P
GCCTGGAGCTCTTCTAGGTGATGACCAAATTTATAATGTTATTGTTACTGCTCATGCCTTTGTAATAATTTTCTTTATAG
TAATACCAATCATAATTGGAGGGTTTGGAAACTGACTTATTCCACTAATGATCGGGGCCCCCGACATGGCATTCCCCCGA
ATAAATAACATAAGTTTTTGACTTCTGCCACCTTCCTTCCTTCTGCTATTAGCCTCTTCGGGAGTTGAAGCAGGTGTAGG
AACAGGATGGACCGTGTATCCCCCACTTGCTGGAAACCTCGCACACGCAGGGGCTTCTGTAGATCTAGCCATTTTCTCCC
TCCACTTAGCAGGTGTCTCATCAATTCTAGGAGCCATTAATTTCATCACAACAATTATTAATATAAAACCTCCAGCCATC
TCACAATACCAAACACCATTATTTGTGTGAGCAATCCTGATTACGGCAGTACTGCTACTGCTATCCCTCCCAGTTCTTGC
TGCCGGCATCACTATGCTGCTAACAGACCGAAACTTAAATACAACATTCTTTGACCCAGCCGGGGGAGGAGACCCAATTC
TATACCAACACCTCTT
>7535_2468|Astroblepus.micrescens|COI-5P
CTACTAATCCGGGCAGAATTAAGCCAACCTGGCTCTCTACTTGGCGACGATCAAATCTACAATGTTATCGTTACCGCACA
TGCTTTTGTAATAATTTTCTTTATAGTAATACCAATCATAATTGGCGGCTTTGGCAACTGGCTGGTCCCCCTTATAATTG
GAGCACCAGATATAGCATTTCCACGAATAAACAATATAAGTTTTTGACTACTGCCCCCATCATTCCTCTTACTACTTGCC
TCCTCAGGAGTTGAAGCTGGGGCCGGAACAGGGTGAACTGTATATCCCCCTCTTGCCGGGAATTTAGCTCACGCAGGAGC
CTCAGTTGATCTTACCATCTTCTCACTACATCTGGCCGGGGTATCCTCAATTCTAGGCGCAATTAACTTCATTACCACCA
TTATTAACATGAAACCACCAGCAATTTCACAATACCAAACACCTTTATTCGTGTGAGCAGTCCTAGTTACAGCTGTCCTA
CTACTTCTATCCCTACCCGTACT-AGCTGCCGGAATTACCATACTACTAACAGACCGAAACCTCAACACTACATTCTTTG
ACCCTGCAGGAGGAGGAGAT
>9007_5051|Astroblepus.grixalvii|COI-5P
CTACTAATCCGGGCAGAATTAAGCCAACCTGGCTCTCTACTTGGCGACGATCAAATCTACAATGTTATCGTTACCGCACA
TGCTTTTGTAATAATTTTCTTTATAGTAATACCAATCATAATTGGCGGCTTTGGCAACTGGCTGGTCCCCCTTATAATTG
GAGCACCAGATATAGCATTTCCACGAATAAACAATATAAGTTTTTGACTACTGCCCCCATCATTCCTCTTACTACTTGCC
TCCTCAGGAGTTGAAGCTGGGGCCGGAACAGGGTGAACTGTATATCCCCCTCTTGCCGGGAATTTAGCTCACGCAGGAGC
CTCAGTTGATCTTACCATCTTCTCACTACATCTGGCCGGGGTATCCTCAATTCTAGGCGCAATTAACTTCATTACCACCA
TTATTAACATGAAACCACCAGCAATTTCACAATACCAAACACCTTTATTCGTGTGAGCAGTCCTAGTTACAGCTGTCCTA
CTACTTCTATCCCTACCCGTACT-AGCTGCCGGAATTACCATACTACTAACAGACCGAAACCTCAACACTACATTCTTTG
ACCCTGCAGGAGGAGGAGAT
>9006_5051|Astroblepus.grixalvii|COI-5P
CTACTAATCCGGGCAGAATTAAGCCAACCTGGCTCTCTACTTGGCGACGATCAAATCTACAATGTTATCGTTACCGCACA
TGCTTTTGTAATAATTTTCTTTATAGTAATACCAATCATAATTGGCGGCTTTGGCAACTGGCTGGTCCCCCTTATAATTG
GAGCACCAGATATAGCATTTCCACGAATAAACAATATAAGTTTTTGACTACTGCCCCCATCATTCCTCTTACTACTTGCC
TCCTCAGGAGTTGAAGCTGGGGCCGGAACAGGGTGAACTGTATATCCCCCTCTTGCCGGGAATTTAGCTCACGCAGGAGC
CTCAGTTGATCTTACCATCTTCTCACTACATCTGGCCGGGGTATCCTCAATTCTAGGCGCAATTAACTTCATTACCACCA
TTATTAACATGAAACCACCAGCAATTTCACAATACCAAACACCTTTATTCGTGTGAGCAGTCCTAGTTACAGCTGTCCTA
CTACTTCTATCCCTACCCGTACT-AGCTGCCGGAATTACCATACTACTAACAGACCGAAACCTCAACACTACATTCTTTG
ACCCTGCAGGAGGAGGAGAT
>8120_3491|Astroblepus.sp|COI-5P
CTACTAATCCGGGCAGAATTAAGCCAACCTGGCTCTCTACTTGGCGACGATCAAATCTACAATGTTATCGTTACCGCACA
TGCTTTTGTAATAATTTTCTTTATAGTAATACCAATCATAATTGGCGGCTTTGGCAACTGGCTGGTCCCCCTTATAATTG
GAGCACCAGATATAGCATTTCCACGAATAAACAATATAAGTTTTTGACTACTGCCCCCATCATTCCTCTTACTACTTGCC
TCCTCAGGAGTTGAAGCTGGGGCCGGAACAGGGTGAACTGTATATCCCCCTCTTGCCGGGAATTTAGCTCACGCAGGGGC
CTCAGTTGATCTTACCATCTTCTCACTACATCTGGCCGGGGTATCCTCAATTCTAGGCGCAATTAACTTCATTACCACCA
TTATTAACATGAAACCACCAGCAATTTCACAATACCAAACACCTTTATTCGTGTGAGCAGTCCTAGTTACAGCTGTCCTA
CTACTTCTATCCCTACCCGTACT-AGCTGCCGGAATTACCATACTACTAACAGACCGAAACCTCAACACTACATTCTTTG
ACCCTGCAGGAGGAGGAGAT
>9055_5067|Astroblepus.sp|COI-5P
CTACTAATCCGGGCAGAATTAAGCCAACCTGGCTCTCTACTTGGCGACGATCAAATCTACAATGTTATCGTTACCGCACA
TGCTTTTGTAATAATTTTCTTTATAGTAATACCAATCATAATTGGCGGCTTTGGCAACTGGCTGGTCCCCCTTATAATTG
GAGCACCAGATATAGCATTTCCACGAATAAACAATATAAGTTTTTGACTACTGCCCCCATCATTCCTCTTACTACTTGCC
TCCTCAGGAGTTGAAGCTGGGGCCGGAACAGGGTGAACTGTATATCCCCCTCTTGCCGGGAATTTAGCTCACGCAGGGGC
CTCAGTTGATCTTACCATCTTCTCACTACATCTGGCCGGGGTATCCTCAATTCTAGGCGCAATTAACTTCATTACCACCA
TTATTAACATGAAACCACCAGCAATTTCACAATACCAAACACCTTTATTCGTGTGAGCAGTCCTAGTTACAGCTGTCCTA
CTACTTCTATCCCTGCCCGTACT-AGCTGCCGGAATTACCATACTACTAACAGACCGAAACCTCAACACTACATTCTTTG
ACCCTGCAGGAGGAGGAGAT
>5101B_5101|Astroblepus.grixalviii|COI-5P
TGTATTTAGTATTTGGCGCCTGAGCAGGAATAGTTGGTACAGCCCTTAGTCTACTAATCCGGGCAGAATTAAGCCAACCT
GGCTCTCTACTTGGCGACGATCAAATCTACAATGTTATCGTTACCGCACATGCTTTTGTAATAATTTTCTTTATAGTAAT
ACCAATCATAATTGGCGGCTTTGGCAACTGGCTGGTCCCCCTTATAATTGGAGCACCAGATATAGCATTTCCACGAATAA
ACAATATAAGTTTTTGACTACTGCCCCCATCATTCCTCTTACTACTTGCCTCCTCAGGAGTTGAAGCTGGGGCCGGAACA
GGGTGAACTGTATATCCCCCTCTTGCCGGGAATTTAGCTCACGCAGGAGCCTCAGTTGATCTTACCATCTTCTCACTACA
TCTGGCCGGGGTATCCTCAATTCTAGGCGCAATTAACTTCATTACCACCATTATTAACATGAAACCACCAGCAATTTCAC
AATACCAAACACCTTTATTCGTGTGAGCAGTCCTAGTTACAGCTGTCCTACTACTTCTATCCCTACCCGTACTAGCTGCC
GGAATTACCATACTACTAACAGACCGAAACCTCAACACTACATTCTTTGACCCTGCAGGAGGAGGAGATCCAATTCTCTA
CCAACAT
>5101C_5101|Astroblepus.grixalvii|COI-5P
CTACTAATCCGGGCAGAATTAAGCCAACCTGGCTCTCTACTTGGCGACGATCAAATCTACAATGTTATCGTTACCGCACA
TGCTTTTGTAATAATTTTCTTTATAGTAATACCAATCATAATTGGCGGCTTTGGCAACTGGCTGGTCCCCCTTATAATTG
GAGCACCAGATATAGCATTTCCACGAATAAACAATATAAGTTTTTGACTACTGCCCCCATCATTCCTCTTACTACTTGCC
TCCTCAGGAGTTGAAGCTGGGGCCGGAACAGGGTGAACTGTATATCCCCCTCTTGCCGGGAATTTAGCTCACGCAGGAGC
CTCAGTTGATCTTACCATCTTCTCACTACATCTGGCCGGGGTATCCTCAATTCTAGGCGCAATTAACTTCATTACCACCA
TTATTAACATGAAACCACCAGCAATTTCACAATACCAAACACCTTTATTCGTGTGAGCAGTCCTAGTTACAGCTGTCCTA
CTACTTCTATCCCTACCCGTACT-AGCTGCCGGAATTACCATACTACTAACAGACCGAAACCTCAACACTACATTCTTTG
ACCCTGCAGGAGGAGGAGAT
>7476_2228|Astroblepus.chotae|COI-5P
CTACTAATCCGGGCAGAATTAAGCCAACCTGGCTCTCTACTTGGCGACGATCAAATCTACAATGTTATCGTTACCGCACA
TGCTTTTGTAATAATTTTCTTTATAGTAATACCAATCATAATTGGCGGCTTTGGCAACTGGCTGGTCCCCCTTATAATTG
GAGCACCAGATATAGCATTTCCACGAATAAACAATATAAGTTTTTGACTACTGCCCCCATCATTCCTCTTACTACTTGCC
TCCTCAGGAGTTGAAGCTGGGGCCGGAACAGGGTGAACTGTATATCCCCCTCTTGCCGGGAATTTAGCTCACGCAGGAGC
CTCAGTTGATCTTACCATCTTCTCACTACATCTGGCCGGGGTATCCTCAATTCTAGGCGCAATTAACTTCATTACCACCA
TTATTAACATGAAACCACCAGCAATTTCACAATACCAAACACCTTTATTCGTGTGAGCAGTCCTAGTTACAGCTGTCCTA
CTACTTCTATCCCTACCCGTACT-AGCTGCCGGAATTACCATACTACTAACAGACCGAAACCTCAACACTACATTCTTTG
ACCCTGCAGGAGGAGGAGAT
>5116A_5116|Astroblepus.chapmani|COI-5P
CTACTAATCCGGGCAGAATTAAGCCAACCTGGCTCTCTACTTGGCGACGATCAAATCTACAATGTTATCGTTACCGCACA
TGCTTTTGTAATAATTTTCTTTATAGTAATACCAATCATAATTGGCGGCTTTGGCAACTGGCTGGTCCCCCTTATAATTG
GAGCACCAGATATAGCATTTCCACGAATAAACAATATAAGTTTTTGACTACTGCCCCCATCATTCCTCTTACTACTTGCC
TCCTCAGGAGTTGAAGCTGGGGCCGGAACAGGGTGAACTGTATATCCCCCTCTTGCCGGGAATTTAGCTCACGCAGGAGC
CTCAGTTGATCTTACCATCTTCTCACTACATCTGGCCGGGGTATCCTCAATTCTAGGCGCAATTAACTTCATTACCACCA
TTATTAACATGAAACCACCAGCAATTTCACAATACCAAACACCTTTATTCGTGTGAGCAGTCCTAGTTACAGCTGTCCTA
CTACTTCTATCCCTACCCGTACT-AGCTGCCGGAATTACCATACTACTAACAGACCGAAACCTCAACACTACATTCTTTG
ACCCTGCAGGAGGAGGAGAT
>5116B_5116|Astroblepus.chapmani|COI-5P
CACCCTATATTTAGTATTTGGCGCCTGAGCAGGAATAGTTGGAACAGCTCTTAGTCTACTAATTCGGGCAGAATTAAGCC
AACCCGGCTCCCTACTTGGCGACGATCAAATCTATAATGTTATCGTCACTGCCCACGCATTCGTAATAATCTTCTTCATG
GTAATACCAATCATAATTGGTGGCTTTGGTAACTGATTAGTCCCGCTTATAATCGGAGCACCAGATATGGCATTTCCACG
AATAAATAATATGAGCTTCTGATTACTCCCTCCCTCCTTTCTCTTGTTACTAGCTTCCTCCGGAGTTGAAGCCGGGGCCG
GAACAGGATGAACTGTATACCCGCCCCTTGCTGGAAATTTAGCCCACGCAGGAGCTTCAGTTGACCTCACCATCTTCTCC
CTGCACCTAGCCGGGATTTCTTCAATTCTAGGCGCAATTAACTTCATTACCACCATCATCAACATAAAACCCCCAGCAAT
TTCACAATACCAGACACCCTTATTCGTATGGGCAGTTTTAGTTACAGCTGTCCTACTACTTCTATCCCTCCCCGTGCTCG
CTGCTGGAATTACTATACTTCTCACAGACCGAAACCTTAATACCACGTTCTTTGACCCTGCAGGAGGAGGAGACCCAATT
CTCTACCAACACCTCTTTTGA
>7442_1944|Astroblepus.grixalvii|COI-5P
CTACTAATCCGGGCAGAATTAAGCCAACCTGGCTCTCTACTTGGCGACGATCAAATCTACAATGTTATCGTTACCGCACA
TGCTTTTGTAATAATTTTCTTTATAGTAATACCAATCATAATTGGCGGCTTTGGCAACTGGCTGGTCCCCCTTATAATTG
GAGCACCAGATATAGCATTTCCACGAATAAACAATATAAGTTTTTGACTACTGCCCCCATCATTCCTCTTACTACTTGCC
TCCTCAGGAGTTGAAGCTGGGGCCGGAACAGGGTGAACTGTATATCCCCCTCTTGCTGGGAATTTAGCTCACGCAGGGGC
CTCAGTTGATCTTACCATCTTCTCACTACATCTGGCCGGGGTATCCTCAATTCTAGGCGCAATTAACTTCATTACCACCA
TTATTAACATGAAACCACCAGCAATTTCACAATACCAAACACCTTTATTCGTGTGAGCAGTCCTAGTTACAGCTGTCCTA
CTACTTCTATCCCTACCCGTACT-AGCTGCCGGAATTACCATACTACTAACAGACCGAAACCTCAACACTACATTCTTTG
ACCCTGCAGGAGGAGGAGAT
>7564_2542|Astroblepus.grixalvii|COI-5P
CTACTAATCCGGGCAGAATTAAGCCAACCTGGCTCTCTACTTGGCGACGATCAAATCTACAATGTTATCGTTACCGCACA
TGCTTTTGTAATAATTTTCTTTATAGTAATACCAATCATAATTGGCGGCTTTGGCAACTGGCTGGTCCCCCTTATAATTG
GAGCACCAGATATAGCATTTCCACGAATAAACAATATAAGTTTTTGACTACTGCCCCCATCATTCCTCTTACTACTTGCC
TCCTCAGGAGTTGAAGCTGGGGCCGGAACAGGGTGAACTGTATATCCCCCTCTTGCCGGGAATTTAGCTCACGCAGGAGC
CTCAGTTGATCTTACCATCTTCTCACTACATCTGGCCGGGGTATCCTCAATTCTAGGCGCAATTAACTTCATTACCACCA
TTATTAACATGAAACCACCAGCAATTTCACAATACCAAACACCTTTATTCGTGTGAGCAGTCCTAGTTACAGCTGTCCTA
CTACTTCTATCCCTACCCGTACT-AGCTGCCGGAATTACCATACTACTAACAGACCGAAACCTCAACACTACATTCTTTG
ACCCTGCAGGAGGAGGAGAT
>7984_3476|Astroblepus.trifasciatus|COI-5P
CCAACCCGGCTCCCTACTTGGCGACGATCAAATCTACAATGTAATCGTCACCGCACATGCTTTCGTAATAATCTTCTTCA
TAGTAATACCAATCATAATTGGCGGCTTTGGTAACTGACTAGTTCCACTTATAATCGGAGCACCAGACATGGCATTCCCA
CGAATAAACAATATAAGCTTCTGACTGCTCCCTCCATCCTTTCTCTTGCTATTAGCTTCCTCCGGAGTTGAAGCCGGGGC
CGGAACAGGGTGAACAGTATACCCCCCGCTTGCTGGAAATTTAGCTCACGCAGGAGCTTCAGTAGACCTCACCATCTTTT
CTCTCCACCTGGCCGGTATCTCTTCAATTCTAGGAGCAATTAACTTCATTACCACCATCATTAACATAAAACCCCCTGCA
ATTTCACAATACCAAACACCCTTGTTCGTATGAGCAGTTTTAGTTACAGCTGTCCTACTACTTCTATCCCTCCCCGTGCT
CGCTGCGGGAATCACCATGCTACTAACAGACCGAAACCTAAATACTACATTCTTTGACCCTGCAGGAGGAGGG
>8099_3629|Astroblepus.trifasciatus|COI-5P
NNNNNNNNNNNNNNNNNNNNNNNCCAACCTGGCTCTCTACTTGGCGACGATCAAATCTACAATGTTATCGTTACCGCACA
TGCTTTTGTAATAATTTTCTTTATAGTAATACCAATCATAATTGGCGGCTTTGGCAACTGGCTGGTCCCCCTTATAATTG
GAGCACCAGATATAGCATTTCCACGAATAAACAATATAAGTTTTTGACTACTGCCCCCATCATTCCTCTTACTACTTGCC
TCCTCAGGAGTTGAAGCTGGGGCCGGAACAGGGTGAACTGTATATCCCCCTCTTGCCGGGAATTTAGCTCACGCAGGAGC
CTCAGTTGATCTTACCATCTTCTCACTACATCTGGCCGGGGTATCCTCAATTCTAGGCGCAATTAACTTCATTACCACCA
TTATTAACATGAAACCACCAGCAATTTCACAATACCAAACACCTTTATTCGTGTGAGCAGTCCTAGTTACAGCTGTCCTA
CTACTTCTATCCCTACCCGTACT-AGCTGCCGGAATTACCATACTACTAACAGACCGAAACCTCAACACTACATTCTTTG
ACCCTGCAGGAGGAGGANNN
>8085_3627|Astroblepus.longifilis|COI-5P
CTACTAATCCGGGCAGAATTAAGCCAACCTGGCTCTCTACTTGGCGACGATCAAATCTACAATGTTATCGTTACCGCACA
TGCTTTTGTAATAATTTTCTTTATAGTAATACCAATCATAATTGGCGGCTTTGGCAACTGGCTGGTCCCCCTTATAATTG
GAGCACCAGATATAGCATTTCCACGAATAAACAATATAAGTTTTTGACTACTGCCCCCATCATTCCTCTTACTACTTGCC
TCCTCAGGAGTTGAAGCTGGGGCCGGAACAGGGTGAACTGTATATCCCCCTCTTGCCGGGAATTTAGCTCACGCAGGGGC
CTCAGTTGATCTTACCATCTTCTCACTACATCTGGCCGGGGTATCCTCAATTCTAGGCGCAATTAACTTCATTACCACCA
TTATTAACATGAAACCACCAGCAATTTCACAATACCAAACACCTTTATTCGTGTGAGCAGTCCTAGTTACAGCTGTCCTA
CTACTTCTATCCCTGCCCGTACT-AGCTGCCGGAATTACCATACTACTAACAGACCGAAACCTCAACACTACATTCTTTG
ACCCTGCAGGAGGAGGAGAT
>8089_3581|Astroblepus.longifilis|COI-5P
CTACTAATCCGGGCAGAATTAAGCCAACCTGGCTCTCTACTTGGCGACGATCAAATCTACAATGTTATCGTTACCGCACA
TGCTTTTGTAATAATTTTCTTTATAGTAATACCAATCATAATTGGCGGCTTTGGCAACTGGCTGGTCCCCCTTATAATTG
GAGCACCAGATATAGCATTTCCACGAATAAACAATATAAGTTTTTGACTACTGCCCCCATCATTCCTCTTACTACTTGCC
TCCTCAGGAGTTGAAGCTGGGGCCGGAACAGGGTGAACTGTATATCCCCCTCTTGCCGGGAATTTAGCTCACGCAGGGGC
CTCAGTTGATCTTACCATCTTCTCACTACATCTGGCCGGGGTATCCTCAATTCTAGGCGCAATTAACTTCATTACCACCA
TTATTAACATGAAACCACCAGCAATTTCACAATACCAAACACCTTTATTCGTGTGAGCAGTCCTAGTTACAGCTGTCCTA
CTACTTCTATCCCTGCCCGTACT-AGCTGCCGGAATTACCATACTACTAACAGACCGAAACCTCAACACTACATTCTTTG
ACCCTGCAGGAGGAGGAGAT
>7468_2230|Astroblepus.chotae|COI-5P
CTACTAATCCGGGCAGAATTAAGCCAACCTGGCTCTCTACTTGGCGACGATCAAATCTACAATGTTATCGTTACCGCACA
TGCTTTTGTAATAATTTTCTTTATAGTAATACCAATCATAATTGGCGGCTTTGGCAACTGGCTGGTCCCCCTTATAATTG
GAGCACCAGATATAGCATTTCCACGAATAAACAATATAAGTTTTTGACTACTGCCCCCATCATTCCTCTTACTACTTGCC
TCCTCAGGAGTTGAAGCTGGGGCCGGAACAGGGTGAACTGTATATCCCCCTCTTGCCGGGAATTTAGCTCACGCAGGGGC
CTCAGTTGATCTTACCATCTTCTCACTACATCTGGCCGGGGTATCCTCAATTCTAGGCGCAATTAACTTCATTACCACCA
TTATTAACATGAAACCACCAGCAATTTCACAATACCAAACACCTTTATTCGTGTGAGCAGTCCTAGTTACAGCTGTCCTA
CTACTTCTATCCCTGCCCGTACT-AGCTGCCGGAATTACCATACTACTAACAGACCGAAACCTCAACACTACATTCTTTG
ACCCTGCAGGAGGAGGAGAT
>7462_2210|Astroblepus.micrescens|COI-5P
CTACTAATCCGGGCAGAATTAAGCCAACCTGGCTCTCTACTTGGCGACGATCAAATCTACAATGTTATCGTTACCGCACA
TGCTTTTGTAATAATTTTCTTTATAGTAATACCAATCATAATTGGCGGCTTTGGCAACTGGCTGGTCCCCCTTATAATTG
GAGCACCAGATATAGCATTTCCACGAATAAACAATATAAGTTTTTGACTACTGCCCCCATCATTCCTCTTACTACTTGCC
TCCTCAGGAGTTGAAGCTGGGGCCGGAACAGGGTGAACTGTATATCCCCCTCTTGCCGGGAATTTAGCTCACGCAGGGGC
CTCAGTTGATCTTACCATCTTCTCACTACATCTGGCCGGGGTATCCTCAATTCTAGGCGCAATTAACTTCATTACCACCA
TTATTAACATGAAACCACCAGCAATTTCACAATACCAAACACCTTTATTCGTGTGAGCAGTCCTAGTTACAGCTGTCCTA
CTACTTCTATCCCTGCCCGTACT-AGCTGCCGGAATTACCATACTACTAACAGACCGAAACCTCAACACTACATTCTTTG
ACCCTGCAGGAGGAGGAGAT
>7534_2415|Astroblepus.grixalvii|COI-5P
CTACTAATCCGGGCAGAATTAAGCCAACCTGGCTCTCTACTTGGCGACGATCAAATCTACAATGTTATCGTTACCGCACA
TGCTTTTGTAATAATTTTCTTTATAGTAATACCAATCATAATTGGCGGCTTTGGCAACTGGCTGGTCCCCCTTATAATTG
GGGCACCAGATATAGCATTTCCACGAATAAACAATATAAGTTTTTGACTACTGCCCCCATCATTCCTCTTACTACTTGCC
TCCTCAGGAGTTGAAGCTGGGGCCGGAACAGGGTGAACTGTATATCCCCCTCTTGCTGGGAATTTAGCTCACGCAGGGGC
CTCAGTTGATCTTACCATCTTCTCACTACATCTGGCCGGGGTATCCTCAATTCTAGGCGCAATTAACTTCATTACCACCA
TTATTAACATGAAACCACCAGCAATTTCACAATACCAAACACCTTTATTCGTATGAGCAGTCCTAGTTACAGCTGTCCTA
CTACTTCTATCCCTGCCCGTACT-AGCTGCCGGAATTACCATACTACTAACAGACCGAAACCTCAACACTACATTCTTTG
ACCCTGCAGGAGGAGGAGAT
>8351_3873|Astroblepus.micrescens|COI-5P
CTACTAATCCGGGCAGAATTAAGCCAACCTGGCTCTCTACTTGGCGACGATCAAATCTACAATGTTATCGTTACCGCACA
TGCTTTTGTAATAATTTTCTTTATAGTAATACCAATCATAATTGGCGGCTTTGGCAACTGGCTGGTCCCCCTTATAATTG
GAGCACCAGATATAGCATTTCCACGAATAAACAATATAAGTTTTTGACTACTACCCCCATCATTCCTCTTACTACTTGCC
TCCTCAGGAGTTGAAGCTGGGGCCGGAACAGGGTGAACTGTATATCCCCCGCTTGCTGGGAATTTAGCTCACGCAGGGGC
CTCAGTTGATCTTACCATCTTTTCACTACATCTGGCCGGAGTATCCTCAATTCTAGGCGCAATTAACTTCATTACCACCA
TTATTAACATGAAACCCCCAGCAATTTCACAATACCAAACACCTTTATTCGTATGAGCAGTCCTAGTTACAGCTGTCCTA
CTACTTCTATCCCTGCCCGTACT-AGCTGCCGGAATCACCATACTACTAACAGACCGAAACCTCAACACTACATTCTTTG
ACCCTGCAGGGGGAGGGGAT
>8565_3938|Astroblepus.grixalvii|COI-5P
CTACTAATCCGGGCAGAATTAAGCCAACCTGGCTCTCTACTTGGCGACGATCAAATCTACAATGTTATCGTTACCGCACA
TGCTTTTGTAATAATTTTCTTTATAGTAATACCAATCATAATTGGCGGCTTTGGCAACTGGCTGGTCCCCCTTATAATTG
GAGCACCAGATATAGCATTTCCACGAATAAACAATATAAGTTTTTGACTACTACCCCCATCATTCCTCTTACTACTTGCC
TCCTCAGGAGTTGAAGCTGGGGCCGGAACAGGGTGAACTGTATATCCCCCGCTTGCTGGGAATTTAGCTCACGCAGGGGC
CTCAGTTGATCTTACCATCTTTTCACTACATCTGGCCGGAGTATCCTCAATTCTAGGCGCAATTAACTTCATTACCACCA
TTATTAACATGAAACCCCCAGCAATTTCACAATACCAAACACCTTTATTCGTATGAGCAGTCCTAGTTACAGCTGTCCTA
CTACTTCTATCCCTGCCCGTACT-AGCTGCCGGAATCACCATACTACTAACAGACCGAAACCTCAACACTACATTCTTTG
ACCCTGCAGGGGGAGGGGAT
>8352_3872|Astroblepus.chapmani|COI-5P
CTACTAATCCGGGCAGAATTAAGCCAACCTGGCTCTCTACTTGGCGACGATCAAATCTACAATGTTATCGTTACCGCACA
TGCTTTTGTAATAATTTTCTTTATAGTAATACCAATCATAATTGGCGGCTTTGGCAACTGGCTGGTCCCCCTTATAATTG
GAGCACCAGATATAGCATTTCCACGAATAAACAATATAAGTTTTTGACTACTACCCCCATCATTCCTCTTACTACTTGCC
TCCTCAGGAGTTGAAGCTGGGGCCGGAACAGGGTGAACTGTATATCCCCCGCTTGCTGGGAATTTAGCTCACGCAGGGGC
CTCAGTTGATCTTACCATCTTTTCACTACATCTGGCCGGAGTATCCTCAATTCTAGGCGCAATTAACTTCATTACCACCA
TTATTAACATGAAACCCCCAGCAATTTCACAATACCAAACACCTTTATTCGTATGAGCAGTCCTAGTTACAGCTGTCCTA
CTACTTCTATCCCTGCCCGTACT-AGCTGCCGGAATCACCATACTACTAACAGACCGAAACCTCAACACTACATTCTTTG
ACCCTGCAGGGGGAGGGGAT
>5318A_5318|Astroblepus.sp|COI-5P
CTACTAATCCGGGCAGAATTAAGCCAACCTGGCTCTCTACTTGGCGACGATCAAATCTACAATGTTATCGTTACCGCACA
TGCTTTTGTAATAATTTTCTTTATAGTAATACCAATCATAATTGGCGGCTTTGGCAACTGACTGGTCCCCCTTATAATTG
GGGCACCAGATATAGCATTTCCACGAATAAACAATATAAGTTTTTGACTACTGCCCCCATCATTCCTCTTATTACTTGCC
TCCTCAGGAGTTGAAGCTGGGGCCGGAACAGGGTGAACTGTATATCCCCCACTTGCTGGTAATTTAGCTCACGCAGGGGC
CTCAGTTGATCTTACCATCTTTTCACTACATCTGGCCGGGGTATCCTCAATTCTAGGCGCAATCAACTTCATTACCACCA
TTATTAACATGAAACCACCAGCAATCTCACAATACCAAACACCTTTATTCGTATGGGCAGTCCTAGTTACAGCTGTCCTA
CTACTTCTATCCCTCCCCGTACT-AGCTGCCGGAATTACCATACTACTAACAGACCGAAACCTCAACACTACATTCTTTG
ACCCTGCAGGAGGGGGAGAT
>5318B_5318|Astroblepus.sp|COI-5P
GAGCAGGAATAGTTGGTACAGCCCTTAGTCTACTAATCCGGGCAGAATTAAGCCAACCTGGCTCTCTACTTGGCGACGAT
CAAATCTACAATGTTATCGTTACCGCACATGCTTTTGTAATAATTTTCTTTATAGTAATACCAATCATAATTGGCGGCTT
TGGCAACTGACTGGTCCCCCTTATAATTGGGGCACCAGATATAGCATTTCCACGAATAAACAATATAAGTTTTTGACTAC
TGCCCCCATCATTCCTCTTATTACTTGCCTCCTCAGGAGTTGAAGCTGGGGCCGGAACAGGGTGAACTGTATATCCCCCA
CTTGCTGGTAATTTAGCTCACGCAGGGGCCTCAGTTGATCTTACCATCTTTTCACTACATCTGGCCGGGGTATCCTCAAT
TCTAGGCGCAATCAACTTCATTACCACCATTATTAACATGAAACCACCAGCAATCTCACAATACCAAACACCTTTATTCG
TATGGGCAGTCCTAGTTACAGCTGTCCTACTACTTCTATCCCTCCCCGTACTAGCTGCCGGAATTACCATACTACTAACA
GACCGAAACCTCAACACTACATTCTTTGACCCTGCAGGAGGGGGAGATCCAATT
>5312A_5312|Astroblepus.sp|COI-5P
GAGCAGGAATAGTTGGGACAGCTCTTAGTCTACTAATTCGAGCAGAATTAAGCCAACCCGGCTCCCTACTTGGCGACGAT
CAAATCTACAATGTAATCGTCACCGCACATGCTTTCGTAATAATCTTCTTCATAGTAATACCAATCATAATTGGCGGCTT
TGGTAACTGACTAGTTCCACTTATAATCGGAGCACCAGACATGGCATTCCCACGAATAAACAATATAAGCTTCTGACTGC
TCCCTCCATCCTTTCTCTTGCTATTAGCTTCCTCCGGAGTTGAAGCCGGGGCCGGAACAGGGTGAACTGTATACCCCCCG
CTTGCTGGAAATTTAGCTCACGCAGGAGCTTCAGTAGACCTCACCATCTTTTCTCTCCACCTGGCCGGTATCTCTTCAAT
TCTAGGAGCAATTAACTTCATTACCACCATCATTAACATAAAACCCCCTGCAATTTCACAATACCAAACACCCTTGTTCG
TATGAGCAGTTTTAGTTACAGCTGTCCTACTACTTCTATCCCTCCCCGTGCTCGCTGCGGGAATCACCATGCTACTAACA
GACCGAAACCTAAATACTACATTCTTTGACCCTGCAGGAGGAGGGGACCCAATT
>8343_3870|Astroblepus.chapmani|COI-5P
CTACTAATTCGGGCAGAATTAAGCCAACCTGGCTCTCTCCTTGGCGACGATCAAATCTACAATGTTATCGTTACCGCACA
TGCTTTCGTAATAATTTTCTTTATAGTAATACCAATCATAATTGGTGGTTTTGGTAACTGACTGGTCCCACTTATAATTG
GAGCACCCGACATAGCATTTCCACGAATAAACAATATAAGTTTCTGATTACTTCCCCCATCATTTCTCTTGTTACTTGCC
TCATCAGGGGTTGAAGCGGGGGCCGGAACAGGATGAACTGTATACCCCCCACTTGCTGGGAATCTAGCTCACGCAGGAGC
CTCAGTTGATCTTACCATCTTTTCACTTCACCTAGCCGGTGTATCCTCAATTCTAGGCGCAATTAACTTCATTACCACCA
TCATTAACATAAAACCCCCAGCAATTTCACAATATCAAACACCCCTATTTGTATGGGCAGTTTTAGTTACAGCTGTCCTA
CTACTTCTATCCCTCCCTGTGCT-AGCCGCCGGAATTACTATGCTATTAACAGACCGTAACCTCAACACTACATTTTTTG
ACCCTGCGGGCGGAGGGGAT
>8344_3869|Astroblepus.sp|COI-5P
CTACTAATTCGGGCAGAATTAAGCCAACCTGGCTCTCTCCTTGGCGACGATCAAATCTACAATGTTATCGTTACCGCACA
TGCTTTCGTAATAATTTTCTTTATAGTAATACCAATCATAATTGGTGGTTTTGGTAACTGACTGGTCCCACTTATAATTG
GAGCACCCGACATAGCATTTCCACGAATAAACAATATAAGTTTCTGATTACTTCCCCCATCATTTCTCTTGTTACTTGCC
TCATCAGGGGTTGAAGCGGGGGCCGGAACAGGATGAACTGTATACCCCCCACTTGCTGGGAATCTAGCTCACGCAGGAGC
CTCAGTTGATCTTACCATCTTTTCACTTCACCTAGCCGGTGTATCCTCAATTCTAGGCGCAATTAACTTCATTACCACCA
TCATTAACATAAAACCCCCAGCAATTTCACAATATCAAACACCCCTATTTGTATGGGCAGTTTTAGTTACAGCTGTCCTA
CTACTTCTATCCCTCCCTGTGCT-AGCCGCCGGAATTACTATGCTATTAACAGACCGTAACCTCAACACTACATTTTTTG
ACCCTGCGGGCGGAGGGGAT
>8103_3589|Astroblepus.chapmani|COI-5P
CCTATATTTAGTATTTGGCGCCTGAGCAGGAATAGTTGGAACAGCTCTTAGTCTACTAATTCGGGCAGAATTAAGCCAAC
CCGGCTCCCTACTTGGCGACGATCAAATCTATAATGTTATCGTCACTGCCCACGCATTCGTAATAATCTTCTTCATGGTA
ATACCAATCATAATTGGTGGCTTTGGTAACTGATTAGTCCCGCTTATAATCGGAGCACCAGATATGGCATTTCCACGAAT
AAATAATATGAGCTTCTGATTACTCCCTCCCTCCTTTCTCTTGTTACTAGCTTCCTCCGGAGTTGAAGCCGGGGCCGGAA
CAGGATGAACTGTATACCCGCCCCTTGCTGGAAATTTAGCCCACGCAGGAGCTTCAGTTGACCTCACCATCTTCTCCCTG
CACCTAGCCGGGATTTCTTCAATTCTAGGCGCAATTAACTTCATTACCACCATCATCAACATAAAACCCCCAGCAATTTC
ACAATACCAGACACCCTTATTCGTATGGGCAGTTTTAGTTACAGCTGTCCTACTACTTCTATCCCTCCCCGTGCTCGCTG
CTGGAATTACTATACTTCTCACAGACCGAAACCTTAATACCACGTTCTTTGACCCTGCAGGAGGAGGAGACCCAATTCTC
TACCAACACCTC
>8309_3864|Astroblepus.chapmani|COI-5P
CCTATATTTAGTATTTGGTGCCTGAGCTGGAATAGTTGGCACAGCCCTTAGTCTACTAATTCGGGCAGAATTAAGCCAAC
CTGGCTCTCTCCTTGGCGACGATCAAATCTACAATGTTATCGTTACCGCACATGCTTTCGTAATAATTTTCTTTATAGTA
ATACCAATCATAATTGGTGGTTTTGGTAACTGACTGGTCCCACTTATAATTGGAGCACCCGACATAGCATTTCCACGAAT
AAACAATATAAGTTTCTGATTACTTCCCCCATCATTTCTCTTGTTACTTGCCTCATCAGGGGTTGAAGCGGGGGCCGGAA
CAGGATGAACTGTATACCCCCCACTTGCTGGGAATCTAGCTCACGCAGGAGCCTCAGTTGATCTTACCATCTTTTCACTT
CACCTAGCCGGTGTATCCTCAATTCTAGGCGCAATTAACTTCATTACCACCATCATTAACATAAAACCCCCAGCAATTTC
ACAATATCAAACACCCCTATTTGTATGGGCAGTTTTAGTTACAGCTGTCCTACTACTTCTATCCCTCCCTGTGCTAGCCG
CCGGAATTACTATGCTATTAACAGACCGTAACCTCAACACTACATTTTTTGACCCTGCGGGCGGAGGGGATCCAATCCTC
TACCAACACCTATTC
>8310_3794|Astroblepus.chapmani|COI-5P
CCTATATTTAGTATTTGGTGCCTGAGCTGGAATAGTTGGCACAGCCCTTAGTCTACTAATTCGGGCAGAATTAAGCCAAC
CTGGCTCTCTCCTTGGCGACGATCAAATCTACAATGTTATCGTTACCGCACATGCTTTCGTAATAATTTTCTTTATAGTA
ATACCAATCATAATTGGTGGTTTTGGTAACTGACTGGTCCCACTTATAATTGGAGCACCCGACATAGCATTTCCACGAAT
AAACAATATAAGTTTCTGATTACTTCCCCCATCATTTCTCTTGTTACTTGCCTCATCAGGGGTTGAAGCGGGGGCCGGAA
CAGGATGAACTGTATACCCCCCACTTGCTGGGAATCTAGCTCACGCAGGAGCCTCAGTTGATCTTACCATCTTTTCACTT
CACCTAGCCGGTGTATCCTCAATTCTAGGCGCAATTAACTTCATTACCACCATCATTAACATAAAACCCCCAGCAATTTC
ACAATATCAAACACCCCTATTTGTATGGGCAGTTTTAGTTACAGCTGTCCTACTACTTCTATCCCTCCCTGTGCTAGCCG
CCGGAATTACTATGCTATTAACAGACCGTAACCTCAACACTACATTTTTTGACCCTGCGGGCGGAGGGGATCCAATCCTC
TACCAACACCTATT
>8316_3825|Astroblepus.chapmani|COI-5P
CCTATATTTAGTATTTGGTGCCTGAGCTGGAATAGTTGGCACAGCCCTTAGTCTACTAATTCGGGCAGAATTAAGCCAAC
CTGGCTCTCTCCTTGGCGACGATCAAATCTACAATGTTATCGTTACCGCACATGCTTTCGTAATAATTTTCTTTATAGTA
ATACCAATCATAATTGGTGGTTTTGGTAACTGACTGGTCCCACTTATAATTGGAGCACCCGACATAGCATTTCCACGAAT
AAACAATATAAGTTTCTGATTACTTCCCCCATCATTTCTCTTGTTACTTGCCTCATCAGGGGTTGAAGCGGGGGCCGGAA
CAGGATGAACTGTATACCCCCCACTTGCTGGGAATCTAGCTCACGCAGGAGCCTCAGTTGATCTTACCATCTTTTCACTT
CACCTAGCCGGTGTATCCTCAATTCTAGGCGCAATTAACTTCATTACCACCATCATTAACATAAAACCCCCAGCAATTTC
ACAATATCAAACACCCCTATTTGTATGGGCAGTTTTAGTTACAGCTGTCCTACTACTTCTATCCCTCCCTGTGCTAGCCG
CCGGAATTACTATGCTATTAACAGACCGTAACCTCAACACTACATTTTTTGACCCTGCGGGCGGAGGGGATCCAATCCTC
TACCAACACCTATTC
>8318_3824|Astroblepus.chapmani|COI-5P
CTACTAATTCGGGCAGAATTAAGCCAACCTGGCTCTCTCCTTGGCGACGATCAAATCTACAATGTTATCGTTACCGCACA
TGCTTTCGTAATAATTTTCTTTATAGTAATACCAATCATAATTGGTGGTTTTGGTAACTGACTGGTCCCACTTATAATTG
GAGCACCCGACATAGCATTTCCACGAATAAACAATATAAGTTTCTGATTACTTCCCCCATCATTTCTCTTGTTACTTGCC
TCATCAGGGGTTGAAGCGGGGGCCGGAACAGGATGAACTGTATACCCCCCACTTGCTGGGAATCTAGCTCACGCAGGAGC
CTCAGTTGATCTTACCATCTTTTCACTTCACCTAGCCGGTGTATCCTCAATTCTAGGCGCAATTAACTTCATTACCACCA
TCATTAACATAAAACCCCCAGCAATTTCACAATATCAAACACCCCTATTTGTATGGGCAGTTTTAGTTACAGCTGTCCTA
CTACTTCTATCCCTCCCTGTGCT-AGCCGCCGGAATTACTATGCTATTAACAGACCGTAACCTCAACACTACATTTTTTG
ACCCTGCGGGCGGAGGGGAT
>8121_3491|Astroblepus.sp|COI-5P
CTACTAATTCGGGCAGAATTAAGCCAACCTGGCTCTCTCCTTGGCGACGATCAAATCTACAATGTTATCGTTACCGCACA
TGCTTTCGTAATAATTTTCTTTATAGTAATACCAATCATGATTGGTGGTTTTGGTAACTGACTGGTCCCACTTATAATTG
GAGCACCCGACATAGCATTTCCACGAATAAACAATATAAGTTTCTGATTACTTCCCCCATCATTTCTCTTGTTACTTGCC
TCATCAGGGGTTGAAGCAGGGGCCGGAACAGGATGAACTGTATACCCCCCACTTGCTGGGAATCTAGCCCACGCAGGGGC
CTCAGTTGATCTTACCATCTTTTCACTACACCTAGCCGGTGTATCCTCAATTCTAGGCGCAATTAACTTCATTACCACCA
TCATTAACATAAAACCCCCAGCAATTTCACAATATCAAACACCCCTATTTGTATGGGCAGTTTTAGTTACAGCTGTCCTA
CTACTCCTATCCCTCCCTGTACT-AGCCGCCGGAATTACTATGCTATTAACAGACCGTAACCTCAACACTACATTTTTTG
ACCCGGCGGGCGGAGGGGAT
>8312_3795|Astroblepus.homodon|COI-5P
CTACTAATTCGGGCAGAATTAAGCCAACCTGGCGCTCTCCTTGGCGACGATCAAATCTACAATGTTATCGTTACCGCACA
TGCTTTCGTAATAATTTTCTTTATAGTAATACCAATCATAATCGGTGGTTTTGGCAACTGACTGGTCCCCCTCATAATTG
GAGCACCAGACATAGCATTTCCACGAATAAACAATATGAGCTTCTGACTACTCCCCCCATCATTCCTCTTGTTACTTGCC
TCATCAGGGGTTGAAGCTGGGGCCGGAACAGGATGAACTGTATATCCCCCACTTGCTGGAAATTTAGCCCACGCAGGGGC
CTCAGTTGATCTTACCATCTTTTCACTTCACTTAGCCGGTGTATCCTCAATTCTAGGTGCAATTAACTTCATTACCACCA
TCATTAACATAAAACCCCCAGCAATTTCACAATATCAAACACCCCTATTTGTATGATCAGTCTTAGTTACAGCTGTCCTA
CTACTTCTATCCCTCCCCGTACT-AGCCGCCGGAATTACTATACTACTAACAGACCGCAACCTCAACACTACATTTTTCG
ACCCTGCAGGGGGAGGGGAC
>8340_3862|Astroblepus.sp|COI-5P
GAGCAGGAATAGTTGGAACAGCTCTTAGTCTACTAATTCGGGCAGAATTAAGCCAACCCGGCTCCCTACTTGGCGACGAT
CAAATCTATAATGTTATCGTCACTGCCCACGCATTCGTAATAATCTTCTTCATGGTAATACCAATCATAATTGGTGGCTT
TGGTAACTGATTAATCCCGCTTATAATCGGAGCACCAGATATGGCATTTCCACGAATAAATAATATGAGCTTCTGATTAC
TCCCTCCCTCCTTTCTCTTGTTACTAGCTTCCTCCGGAGTTGAAGCCGGGGCCGGAACAGGATGAACTGTTTATCCGCCC
CTTGCTGGAAATTTAGCCCACGCAGGGGCTTCAGTTGACCTCACCATCTTCTCCCTACACCTAGCCGGGATTTCTTCAAT
TCTAGGCGCAATTAACTTCATTACCACCATTATCAACATAAAACCCCCAGCAATTTCACAATACCAGACACCCTTATTCG
TATGAGCAGTTTTAGTTACAGCTGTCCTACTACTTCTATCCCTCCCCGTGCTCGCTGCTGGAATTACTATACTTCTCACA
GACCGAAACCTTAATACCACGTTCTTTGACCCTGCAGGAGGAGGAGACCCAATT
>8345_3869|Astroblepus.sp|COI-5P
GAGCTGGAATAGTTGGCACAGCCCTTAGTCTACTAATTCGGGCAGAATTAAGCCAACCTGGCTCTCTCCTTGGCGACGAT
CAAATCTACAATGTTATCGTTACCGCACATGCTTTCGTAATAATTTTCTTTATAGTAATACCAATCATAATTGGTGGTTT
TGGTAACTGACTGGTCCCACTTATAATTGGAGCACCCGACATAGCATTTCCACGAATAAACAATATAAGTTTCTGATTAC
TTCCCCCATCATTTCTCTTGTTACTTGCCTCATCAGGGGTTGAAGCGGGGGCCGGAACAGGATGAACTGTATACCCCCCA
CTTGCTGGGAATCTAGCTCACGCAGGAGCCTCAGTTGATCTTACCATCTTTTCACTTCACCTAGCCGGTGTATCCTCAAT
TCTAGGCGCAATTAACTTCATTACCACCATCATTAACATAAAACCCCCAGCAATTTCACAATATCAAACACCCCTATTTG
TATGGGCAGTTTTAGTTACAGCTGTCCTACTACTTCTATCCCTCCCTGTGCTAGCCGCCGGAATTACTATGCTATTAACA
GACCGTAACCTCAACACTACATTTTTTGACCCTGCGGGCGGAGGGGATCCAATC
>8346_3869|Astroblepus.sp|COI-5P
GAGCTGGAATAGTTGGCACAGCCCTTAGTCTACTAATTCGGGCAGAATTAAGCCAACCTGGCTCTCTCCTTGGCGACGAT
CAAATCTACAATGTTATCGTTACCGCACATGCTTTCGTAATAATTTTCTTTATAGTAATACCAATCATAATTGGTGGTTT
TGGTAACTGACTGGTCCCACTTATAATTGGAGCACCCGACATAGCATTTCCACGAATAAACAATATAAGTTTCTGATTAC
TTCCCCCATCATTTCTCTTGTTACTTGCCTCATCAGGGGTTGAAGCGGGGGCCGGAACAGGATGAACTGTATACCCCCCA
CTTGCTGGGAATCTAGCTCACGCAGGAGCCTCAGTTGATCTTACCATCTTTTCACTTCACCTAGCCGGTGTATCCTCAAT
TCTAGGCGCAATTAACTTCATTACCACCATCATTAACATAAAACCCCCAGCAATTTCACAATATCAAACACCCCTATTTG
TATGGGCAGTTTTAGTTACAGCTGTCCTACTACTTCTATCCCTCCCTGTGCTAGCCGCCGGAATTACTATGCTATTAACA
GACCGTAACCTCAACACTACATTTTTTGACCCTGCGGGCGGAGGGGATCCAATC
>8347_3869|Astroblepus.sp|COI-5P
GAGCTGGAATAGTTGGCACAGCCCTTAGTCTACTAATTCGGGCAGAATTAAGCCAACCTGGCTCTCTCCTTGGCGACGAT
CAAATCTACAATGTTATCGTTACCGCACATGCTTTCGTAATAATTTTCTTTATAGTAATACCAATCATAATTGGTGGTTT
TGGTAACTGACTGGTCCCACTTATAATTGGAGCACCCGACATAGCATTTCCACGAATAAACAATATAAGTTTCTGATTAC
TTCCCCCATCATTTCTCTTGTTACTTGCCTCATCAGGGGTTGAAGCGGGGGCCGGAACAGGATGAACTGTATACCCCCCA
CTTGCTGGGAATCTAGCTCACGCAGGAGCCTCAGTTGATCTTACCATCTTTTCACTTCACCTAGCCGGTGTATCCTCAAT
TCTAGGCGCAATTAACTTCATTACCACCATCATTAACATAAAACCCCCAGCAATTTCACAATATCAAACACCCCTATTTG
TATGGGCAGTTTTAGTTACAGCTGTCCTACTACTTCTATCCCTCCCTGTGCTAGCCGCCGGAATTACTATGCTATTAACA
GACCGTAACCTCAACACTACATTTTTTGACCCTGCGGGCGGAGGGGATCCAATC
>8349_3871|Astroblepus.sp|COI-5P
GAGCTGGAATAGTTGGCACAGCCCTTAGTCTACTAATTCGGGCAGAATTAAGCCAACCTGGCTCTCTCCTTGGCGACGAT
CAAATCTACAATGTTATCGTTACCGCACATGCTTTCGTAATAATTTTCTTTATAGTAATACCAATCATAATTGGTGGTTT
TGGTAACTGACTGGTCCCACTTATAATTGGAGCACCCGACATAGCATTTCCACGAATAAACAATATAAGTTTCTGATTAC
TTCCCCCATCATTTCTCTTGTTACTTGCCTCATCAGGGGTTGAAGCGGGGGCCGGAACAGGATGAACTGTATACCCCCCA
CTTGCTGGGAATCTAGCTCACGCAGGAGCCTCAGTTGATCTTACCATCTTTTCACTTCACCTAGCCGGTGTATCCTCAAT
TCTAGGCGCAATTAACTTCATTACCACCATCATTAACATAAAACCCCCAGCAATTTCACAATATCAAACACCCCTATTTG
TATGGGCAGTTTTAGTTACAGCTGTCCTACTACTTCTATCCCTCCCTGTGCTAGCCGCCGGAATTACTATGCTATTAACA
GACCGTAACCTCAACACTACATTTTTTGACCCTGCGGGCGGAGGGGATCCAATC
>9000_5049|Astroblepus.sp|COI-5P
CTACTAATTCGGGCAGAATTAAGCCAACCTGGCGCTCTCCTTGGCGACGATCAAATCTACAATGTTATCGTTACCGCACA
TGCTTTCGTAATAATTTTCTTTATAGTAATACCAATCATGATCGGCGGTTTTGGCAACTGACTGGTCCCCCTCATAATTG
GAGCACCAGACATAGCATTTCCACGAATAAACAATATGAGCTTCTGACTTCTACCCCCCTCATTCCTCTTGCTACTTGCC
TCATCAGGGGTTGAAGCTGGGGCTGGAACAGGATGAACTGTGTACCCTCCACTTGCTGGAAATTTGGCCCACGCAGGAGC
CTCAGTTGATCTTACCATCTTTTCACTCCACCTGGCCGGCGTATCCTCAATTCTAGGCGCAATTAACTTCATTACCACCA
TTATTAACATAAAACCCCCAGCAATTTCACAATATCAAACACCCCTATTTGTATGATCGGTCTTAGTTACAGCTGTCCTG
CTACTTCTATCCCTCCCCGTACT-AGCCGCCGGAATTACTATACTACTAACAGACCGTAACCTCAACACTACATTTTTCG
ACCCTGCAGGGGGAGGGGAC
>5488A_5488|Lasiancistrus.caucanus|COI-5P
CTACTAATTCGGGCAGAACTAAGCCAACCAGGCTCTCTCCTTGGTGACGATCAAATCTACAATGTTATCGTTACCGCACA
TGCTTTCGTAATAATCTTCTTTATAGTAATACCAATCATAATCGGTGGCTTTGGAAACTGACTGGTTCCACTTATGATTG
GGGCACCAGATATAGCATTCCCGCGAATAAATAATATAAGCTTCTGATTACTACCCCCATCATTCCTCTTGTTGCTTGCC
TCCTCAGGTGTCGAGGCTGGAGCCGGAACAGGATGAACTGTGTATCCCCCACTTGCTGGAAATCTAGCCCACGCCGGGGC
CTCAGTTGATCTTACCATCTTTTCACTTCACCTAGCCGGTGTGTCCTCAATTCTAGGCGCAATTAATTTCATTACTACCA
TCATTAATATAAAACCCCCAGCAATTTCCCAATATCAAACACCCTTATTTGTTTGGGCAGTTTTAGTTACAGCTGTCCTA
CTACTTCTGTCTCTCCCAGTCCT-AGCTGCCGGAATTACTATATTACTAACAGACCGTAACCTCAACACCACATTTTTCG
ACCCTGCCGGCGGAGGAGAT
>8288_3784|Hoplosternum.magdalenae|COI-5P
TATTAATTCGAGCGGAGCTTAACCAGCCGGGCTCTTTACTAGGCGACGACCAAATTTACAACGTTATTGTTACTGCGCACGCCTTCGTCATAATCTTCTTTATAGTAATACCAATTTTAATCGGGGGTTTCGGAAATTGACTAATTCCCCTAATGATCGGTGCACCCGACATGGCATTCCCACGAATAAACAACATAAGCTTCTGACTTCTACCCCCCTCATTTCTACTTCTACTAGCCTCATCAGGAGTTGAAGCCGGAGCAGGAACTGGATGAACCGTATACCCACCACTTGCAAGCAACCTTGCCCATGCCGGAGCTTCAGTTGATCTGACCATTTTCTCCCTTCACCTTGCAGGTGTCTCCTCCATCCTTGGATCTATCAACTTCATTACAACCATCATTAACATAAAACCTCCCGCAATCTCTCAATATCAAACACCCCTGTTTATCTGGGCCACCCTAATCACTACTGTTCTTCTCCTTCTGTCTCTCCCAGTCCTAGCTGCCGGAATTACTATGCTATTAACAGATCGAAACCTAAATACCGCATTCTTTGATCCGGCAGGAGGTGGTGATCCTGTTTTATATCAACACTTGTTCTGATTCTTTGCCCCCCCCAAAAAAAAA
>8289_3784|Hoplosternum.magdalenae|COI-5P
GGCACCGCCCTAAGCCTATTAATTCGAGCGGAGCTTAACCAGCTGGGCTCTTTACTAGGCGACGACCAAATTTACAACGTTATTGTTACTGCGCACGCCTTCGTCATAATCTTCTTTATAGTAATACCAATTTTAATCGGGGGTTTCGGAAATTGACTAATTCCCCTAATGATCGGTGCACCCGACATGGCATTCCCACGAATAAACAACATAAGCTTCTGACTTCTACCCCCCTCATTTCTACTTCTACTAGCCTCATCAGGAGTTGAAGCCGGAGCAGGAACTGGATGAACCGTATACCCACCACTTGCAAGCAACCTTGCCCATGCCGGAGCTTCAGTTGATCTGACCATTTTCTCCCTTCACCTTGCAGGTGTCTCCTCCATCCTTGGATCTATCAACTTCATTACAACCATCATTAACATAAAACCTCCCGCAATCTCTCAATATCAAACACCCCTGTTTATCTGGGCCACCCTAATCACTACTGTTCTTCTCCTTCTGTCTCTCCCAGTCCTAGCTGCCGGAATTACTATGCTATTAACAGATCGAAACCTAAATACCGCATTCTTTGATCCGGCAGGAGGTGGTGATCCTGTTTTATATCAACACTTGTTCTGATTTTTTGGTAC
>8290_3784|Hoplosternum.magdalenae|COI-5P
TTAATTCGAGCGGAGCTTAACCAGCCGGGCTCTTTACTAGGCGACGACCAAATTTACAACGTTATTGTTACTGCGCACGCCTTCGTCATAATCTTCTTTATAGTAATACCAATTTTAATCGGGGGTTTCGGAAATTGACTAATTCCCCTAATGATCGGTGCACCCGACATGGCATTCCCACGAATAAACAACATAAGCTTCTGACTTCTACCCCCCTCATTTCTACTTCTACTAGCCTCATCAGGAGTTGAAGCCGGAGCAGGAACTGGATGAACCGTATACCCACCACTTGCAAGCAACCTTGCCCATGCCGGAGCTTCAGTTGATCTGACCATTTTCTCCCTTCACCTTGCAGGTGTCTCCTCCATCCTTGGATCTATCAACTTCATTACAACCATCATTAACATAAAACCTCCCGCAATCTCTCAATATCAAACACCCCTGTTTATCTGGGCCACCCTAATCACTACTGTTCTTCTCCTTCTGTCTCTCCCAGTCCTAGCTGCCGGAATTACTATGCTATTAACAGATCGAAACCTAAATACCGCATTCTTTGATCCGGCAGGAGGTGGTGATCCTGTTTTATATCAACACTTGTTCTGATTCTTTGGACCCCCAAAAA
>8293_3784|Hoplosternum.magdalenae|COI-5P
ATTAATTCGAGCGGAGCTTAACCAGCCGGGCTCTTTACTAGGCGACGACCAAATTTACAACGTTATTGTTACTGCGCACGCCTTCGTCATAATCTTCTTTATAGTAATACCAATTTTAATTGGGGGTTTCGGAAATTGACTAATTCCCCTAATGATCGGTGCACCCGACATGGCATTCCCACGAATAAACAACATAAGCTTCTGACTTCTACCCCCCTCATTTCTACTTCTACTAGCCTCATCAGGAGTTGAAGCCGGAGCAGGAACTGGATGAACCGTATACCCACCACTTGCAAGCAACCTTGCCCATGCCGGAGCTTCAGTTGATCTGACCATTTTCTCCCTTCACCTTGCAGGTGTCTCCTCCATCCTTGGATCTATCAACTTCATTACAACCATCATTAACATAAAACCTCCCGCAATCTCTCAATATCAAACACCCCTGTTTATCTGGGCCACCCTAATCACTACTGTTCTTCTCCTTCTGTCTCTCCCAGTCCTAGCTGCCGGAATTACTATGCTATTAACAGATCGAAACCTAAATACCGCATTCTTTGATCCGGCAGGAGGTGGTGATCCTGTTTTATATCAACACTTGTTCTGATTCTTTGGCCCC
>8295_3784|Hoplosternum.magdalenae|COI-5P
ACCGCCCTAAGCCTATTAATTCGAGCGGAGCTTAACCCGTTAGGCTCTTTACTAGGCGACGACCAAATTTACAACGTTATTGTTACTGCGCACGCCTTCGTCATAATCTTCTTTATAGTAATACCAATTTTAATCGGGGGTTTCGGAAATTGACTAATTCCCCTAATGATCGGTGCACCCGACATGGCATTCCCACGAATAAACAACATAAGCTTCTGACTTCTACCCCCCTCATTTCTACTTCTACTAGCCTCATCAGGAGTTGAAGCCGGAGCAGGAACTGGATGAACCGTATACCCACCACTTGCAAGCAACCTTGCCCATGCCGGAGCTTCAGTTGATCTGACCATTTTCTCCCTTCACCTTGCAGGTGTCTCCTCCATCCTTGGATCTATCAACTTCATTACAACCATCATTAACATAAAACCTCCCGCAATCTCTCAATATCAAACACCCCTGTTTATCTGGGCCACCCTAATCACTACTGTTCTTCTCCTTCTGTCTCTCCCAGTCCTAGCTGCCGGAATTACTATGCTATTAACAGATCGAAACCTAAATACCGCATTCTTTGATCCGGCAGGAGGTGGTGATCCTGTTTTATATCAACACTTGTTCTGATTTTTTGGTCCCGCATTCTTTGATCCGGCAGGAGGTGGTGATCCTGTTTTATATCAACACTTGTTCTGATTCTTTGGTC
>8296_3784|Hoplosternum.magdalenae|COI-5P
CACCGCCCTAAGCCTATTAATTCGAGCGGAGCTTAACCCGTTTGGCTCTTTACTAGGCGACGACCAAATTTACAACGTTATTGTTACTGCGCACGCCTTCGTCATAATCTTCTTTATAGTAATACCAATTTTAATCGGGGGTTTCGGAAATTGACTAATTCCCCTAATGATCGGTGCACCCGACATGGCATTCCCACGAATAAACAACATAAGCTTCTGACTTCTACCCCCCTCATTTCTACTTCTACTAGCCTCATCAGGAGTTGAAGCCGGAGCAGGAACTGGATGAACCGTATACCCACCACTTGCAAGCAACCTTGCCCATGCCGGAGCTTCAGTTGATCTGACCATTTTCTCCCTTCACCTTGCAGGTGTCTCCTCCATCCTTGGATCTATCAACTTCATTACAACCATCATTAACATAAAACCTCCCGCAATCTCTCAATATCAAACACCCCTGTTTATCTGGGCCACCCTAATCACTACTGTTCTTCTCCTTCTGTCTCTCCCAGTCCTAGCTGCCGGAATTACTATGCTATTAACAGATCGAAACCTAAATA
>8297_3784|Hoplosternum.magdalenae|COI-5P
GGCACCGCCCTAAGCCTATTAATTCGAGCGGAGCTTAACCAGCCGGGCTCTTTACTAGGCGACGACCAAATTTACAACGTTATTGTTACTGCGCACGCCTTCGTCATAATCTTCTTTATAGTAATACCAATTTTAATCGGGGGTTTCGGAAATTGACTAATTCCCCTAATGATCGGTGCACCCGACATGGCATTCCCACGAATAAACAACATAAGCTTCTGACTTCTACCCCCCTCATTTCTACTTCTACTAGCCTCATCAGGAGTTGAAGCCGGAGCAGGAACTGGATGAACCGTATACCCACCACTTGCAAGCAACCTTGCCCATGCCGGAGCTTCAGTTGATCTGACCATTTTCTCCCTTCACCTTGCAGGTGTCTCCTCCATCCTTGGATCTATCAACTTCATTACAACCATCATTAACATAAAACCTCCCGCAATCTCTCAATATCAAACACCCCTGTTTATCTGGGCCACCCTAATCACTACTGTTCTTCTCCTTCTGTCTCTCCCAGTCCTAGCTGCCGGAATTACTATGCTATTAACAGATCGAAACCTAAATACCGCATTCTTTGATCCGGCAGGAGGTGGTGATCCTGTTTTATATCAACACTTGTTCTGATTCTTTGGC
>8298_3784|Hoplosternum.magdalenae|COI-5P
CCGCCCTAAGCCTATTAATTCGAGCGGAGCTTAACCAGCCGGGCTCTTTACTAGGCGACGACCAAATTTACAACGTTATTGTTACTGCGCACGCCTTCGTCATAATCTTCTTTATAGTAATACCAATTTTAATCGGGGGTTTCGGAAATTGACTAATTCCCCTAATGATCGGTGCACCCGACATGGCATTCCCACGAATAAACAACATAAGCTTCTGACTTCTACCCCCCTCATTTCTACTTCTACTAGCCTCATCAGGAGTTGAAGCCGGAGCAGGAACTGGATGAACCGTATACCCACCACTTGCAAGCAACCTTGCCCATGCCGGAGCTTCAGTTGATCTGACCATTTTCTCCCTTCACCTTGCAGGTGTCTCCTCCATCCTTGGATCTATCAACTTCATTACAACCATCATTAACATAAAACCTCCCGCAATCTCTCAATATCAAACACCCCTGTTTATCTGGGCCACCCTAATCACTACTGTTCTTCTCCTTCTGTCTCTCCCAGTCCTAGCTGCCGGAATTACTATGCTATTAACAGATCGAAACCTAAATACCGCATTCTTTGATCCGGCAGGAGGTGGTGATCCTGTTTTATATCAACACTTGTTCTGATTCTTTGGTC
>8300_3784|Hoplosternum.magdalenae|COI-5P
GGCACCGCCCTAAGCCTATTAATTCGAGCGGAGCTTAACCAGCCGGGCTCTTTACTAGGCGACGACCAAATTTACAACGTTATTGTTACTGCGCACGCCTTCGTCATAATCTTCTTTATAGTAATACCAATTTTAATCGGGGGTTTCGGAAATTGACTAATTCCCCTAATGATCGGTGCACCCGACATGGCATTCCCACGAATAAACAACATAAGCTTCTGACTTCTACCCCCCTCATTTCTACTTCTACTAGCCTCATCAGGAGTTGAAGCCGGAGCAGGAACTGGATGAACCGTATACCCACCACTTGCAAGCAACCTTGCCCATGCCGGAGCTTCAGTTGATCTGACCATTTTCTCCCTTCACCTTGCAGGTGTCTCCTCCATCCTTGGATCTATCAACTTCATTACAACCATCATTAACATAAAACCTCCCGCAATCTCTCAATATCAAACACCCCTGTTTATCTGGGCCACCCTAATCACTACTGTTCTTCTCCTTCTGTCTCTCCCAGTCCTAGCTGCCGGAATTACTATGCTATTAACAGATCGAAACCTAAATACCGCATTCTTTGATCCGGCAGGAGGTGGTGATCCTGTTTTATATCAACACTTGTTCTGATTCTTTGGTCC
>8301_3784|Hoplosternum.magdalenae|COI-5P
ACCGCCCTAAGCCTATTAATTCGAGCGGAGCTTAACCCGTCGGGCTCTTTACTAGGCGACGACCAAATTTACAACGTTATTGTTACTGCGCACGCCTTCGTCATAATCTTCTTTATAGTAATACCAATTTTAATCGGGGGTTTCGGAAATTGACTAATTCCCCTAATGATCGGTGCACCCGACATGGCATTCCCACGAATAAACAACATAAGCTTCTGACTTCTACCCCCCTCATTTCTACTTCTACTAGCCTCATCAGGAGTTGAAGCCGGAGCAGGAACTGGATGAACCGTATACCCACCACTTGCAAGCAACCTTGCCCATGCCGGAGCTTCAGTTGATCTGACCATTTTCTCCCTTCACCTTGCAGGTGTCTCCTCCATCCTTGGATCTATCAACTTCATTACAACCATCATTAACATAAAACCTCCCGCAATCTCTCAATATCAAACACCCCTGTTTATCTGGGCCACCCTAATCACTACTGTTCTTCTCCTTCTGTCTCTCCCAGTCCTAGCTGCCGGAATTACTATGCTATTAACAGATCGAAACCTAAATACCGCATTCTTTGATCCGGCAGGAGGTGGTGATCCTGTTTTATATCAACACTTGTTCTGATTTTTTGGTCA
>8302_3784|Hoplosternum.magdalenae|COI-5P
GCACCGCCCTAAGCCTATTAATTCGAGCGGAGCTTAACCAGCCGGGCTCTTTACTAGGCGACGACCAAATTTACAACGTTATTGTTACTGCGCACGCCTTCGTCATAATCTTCTTTATAGTAATACCAATTTTAATCGGGGGTTTCGGAAATTGACTAATTCCCCTAATGATCGGTGCACCCGACATGGCATTCCCACGAATAAACAACATAAGCTTCTGACTTCTACCCCCCTCATTTCTACTTCTACTAGCCTCATCAGGAGTTGAAGCCGGAGCAGGAACTGGATGAACCGTATACCCACCACTTGCAAGCAACCTTGCCCATGCCGGAGCTTCAGTTGATCTGACCATTTTCTCCCTTCACCTTGCAGGTGTCTCCTCCATCCTTGGATCTATCAACTTCATTACAACCATCATTAACATAAAACCTCCCGCAATCTCTCAATATCAAACACCCCTGTTTATCTGGGCCACCCTAATCACTACTGTTCTTCTCCTTCTGTCTCTCCCAGTCCTAGCTGCCGGAATTACTATGCTATTAACAGATCGAAACCTAAATACCGCATTCTTTGATCCGGCAGGAGGTGGTGATCCTGTTTTATATCAACACTTGTTCTGATTCTTTGGCCC
>8303_3784|Hoplosternum.magdalenae|COI-5P
CACCGCCCTAAGCCTATTAATTCGAGCGGAGCTTAACCCTTTAGGCTCTTTACTAGGCGACGACCAAATTTACAACGTTATTCTTACTGCGCACGCCTTCGTCATAATCTTCTTTATAGTAATACCAATTTTAATCGGGGGTTTCGGAAATTGACTAATTCCCCTAATGATCGGTGCACCCGACATGGCATTCCCACGAATAAACAACATAAGCTTCTGACTTCTACCCCCCTCATTTCTACTTCTACTAGCCTCATCAGGAGTTGAAGCCGGAGCAGGAACTGGATGAACCGTATACCCACCACTTGCAAGCAACCTTGCCCATGCCGGAGCTTCAGTTGATCTGACCATTTTCTCCCTTCACCTTGCAGGTGTCTCCTCCATCCTTGGATCTATCAACTTCATTACAACCATCATTAACATAAAACCTCCCGCAATCTCTCAATATCAAACACCCCTGTTTATCTGGGCCACCCTAATCACTACTGTTCTTCTCCTTCTGTCTCTCCCAGTCCTAGCTGCCGGAATTACTATGCTATTAACAGATCGAAACCTAAATACCGCATTCTTTGATCCGGCAGGAGGTGGTGATCCTGTTTTATATCAACACTTGTTCTGATTTTTTGGTCACC
>8299_3784|Hoplosternum.magdalenae|COI-5P
ACATTGGCACCCTGTATATAGTATTTGGTGCATGAGCCGGGATAGTCGGCACCGCCCTAAGCCTATTAATTCGAGCGGAGCTTAACCAGCCGGGCTCTTTACTAGGCGACGACCAAATTTACAACGTTATTGTTACTGCGCACGCCTTCGTCATAATCTTCTTTATAGTAATACCAATTTTAATCGGGGGTTTCGGAAATTGACTAATTCCCCTAATGATCGGTGCACCCGACATGGCATTCCCACGAATAAACAACATAAGCTTCTGACTTCTACCCCCCTCATTTCTACTTCTACTAGCCTCATCAGGAGTTGAAGCCGGAGCAGGAACTGGATGAACCGTATACCCACCACTTGCAAGCAACCTTGCCCATGCCGGAGCTTCAGTTGATCTGACCATTTTCTCCCTTCACCTTGCAGGTGTCTCCTCCATCCTTGGATCTATCAACTTCATTACAACCATCATTAACATAAAACCTCCCGCAATCTCTCAATATCAAACACCCCTGTTTATCTGGGCCACCCTAATCACTACTGTTCTTCTCCTTCTGTCTCTCCCAGTCCTAGCTGCCGGAATTACTATGCTATTAACAGATCGAAACCTAAATACCGCATTCTTTGATCCGGCAGGAGGTGGTGATCCTGTTTTATATCAACACTTGTTCTGATTCTTTGG
>5492A_5492|Heptapteridae|COI-5P
CTACTAATTCGGGCAGAACTAAGCCAACCAGGCTCTCTCCTTGGTGACGATCAAATCTACAATGTTATCGTTACCGCACA
TGCTTTCGTAATAATCTTCTTTATAGTAATACCAATCATAATCGGTGGCTTTGGAAACTGACTGGTTCCACTTATGATTG
GGGCACCAGATATAGCATTCCCGCGAATAAATAATATAAGCTTCTGATTACTACCCCCATCATTCCTCTTGTTGCTTGCC
TCCTCAGGTGTCGAGGCTGGAGCCGGAACAGGATGAACTGTGTATCCCCCACTTGCTGGAAATCTAGCCCACGCCGGGGC
CTCAGTTGATCTTACCATCTTTTCACTTCACCTAGCCGGTGTGTCCTCAATTCTAGGCGCAATTAATTTCATTACTACCA
TCATTAATATAAAACCCCCAGCAATTTCCCAATATCAAACACCCTTATTTGTTTGGGCAGTTTTAGTTACAGCTGTCCTA
CTACTTCTGTCTCTCCCAGTCCT-AGCTGCCGGAATTACTATATTACTAACAGACCGTAACCTCAACACCACATTTTTCG
ACCCTGCCGGCGGAGGAGAT
>5449A_5449|Hypostomus.hondae|COI-5P
TTACTTAGTATTTGGTGCCTGAGCCGGAATGGTTGGCACAGCCCTCAGCCTTTTAATTCGGGCTGAGTTAAGCCAACCCG
GCTCCCTACTAGGTGATGACCAAATTTATAATGTCATCGTTACTGCACATGCCTTCGTAATAATTTTCTTTATAGTGATG
CCAATTATAATTGGGGGCTTTGGAAACTGACTAGTTCCACTAATGATTGGAGCACCCGATATGGCCTTCCCACGAATAAA
TAATATGAGCTTCTGACTACTCCCCCCATCGTTTCTTCTCTTATTAGCTTCCTCAGGGGTTGAAGCGGGAGCAGGAACAG
GTTGAACTGTATACCCACCCCTCGCTGGAAATTTAGCCCATGCAGGAGCTTCAGTTGACCTAACCATCTTTTCACTCCAC
CTGGCTGGTGTTTCTTCAATTTTAGGAGCAATTAACTTTATTACTACTATTATTAATATAAAACCCCCAGCTATTTCTCA
ATATCAAACTCCTTTATTTGTATGAGCTGTACTTGTTACAGCTGTTCTACTCCTGCTCTCACTACCAGTTCTAGCCGCTG
GTATTACAATATTATTAACAGACCGAAATTTAAATACCACCTTCTTTGACCCTGCAGGAGGTGGAGACCCAATCCTCTAC
CAACACTTATTT
>7493_2289|Astroblepus.guentheri|COI-5P
CTACTAATTCGGGCAGAACTAAGCCAACCAGGCTCTCTCCTTGGTGACGATCAAATCTACAATGTTATCGTTACCGCACA
TGCTTTCGTAATAATCTTCTTTATAGTAATACCAATCATAATCGGTGGCTTTGGAAACTGACTGGTTCCACTTATGATTG
GGGCACCAGATATAGCATTCCCGCGAATAAATAATATAAGCTTCTGATTACTACCCCCATCATTCCTCTTGTTGCTTGCC
TCCTCAGGTGTCGAGGCTGGGGCCGGAACAGGATGAACTGTGTATCCCCCACTTGCTGGAAATCTAGCCCACGCCGGGGC
CTCAGTTGATCTTACCATCTTTTCACTTCACCTAGCCGGTGTGTCCTCAATTCTAGGCGCAATTAATTTCATTACTACCA
TCATTAATATAAAACCCCCAGCAATTTCCCAATATCAAACACCCTTATTTGTTTGGGCAGTTTTAGTTACAGCTGTCCTA
CTACTTCTGTCTCTCCCAGTCCT-AGCTGCCGGAATTACTATATTACTAACAGACCGTAACCTCAACACCACATTTTTCG
ACCCTGCCGGCGGAGGAGAT
>7457_2208|Astroblepus.unifasciatus|COI-5P
GCTCTTAGTCTACTAATTCGAGCAGAATTAAGCCAACCCGGCTCCCTACTTGGCGACGATCAAATCTACAATGTAATCGT
CACCGCACATGCTTTCGTAATAATCTTCTTCATAGTAATACCAATCATAATTGGCGGCTTTGGTAACTGACTAGTTCCAC
TTATAATCGGAGCACCAGACATGGCATTCCCACGAATAAACAATATAAGCTTCTGACTGCTCCCTCCATCCTTTCTCTTG
CTATTAGCTTCCTCCGGAGTTGAAGCCGGGGCCGGAACAGGGTGAACAGTATACCCCCCGCTTGCTGGAAATTTAGCTCA
CGCAGGAGCTTCAGTAGACCTCACCATCTTTTCTCTCCACCTGGCCGGTATCTCTTCAATTCTAGGAGCAATTAACTTCA
TTACCACCATCATTAACATAAAACCCCCTGCAATTTCACAATACCAAACACCCTTGTTCGTATGAGCAGTTTTAGTTACA
GCTGTCCTACTACTTCTATCCCTCCCCGTGCTCGCTGCGGGAATCACCATGCTACTAACAGACCGAAACCTAAATACTAC
ATTCTTTGACCCTGCAGGAGGAGGGGACCCAATTC
>7458_2208|Astroblepus.unifasciatus|COI-5P
CTACTAATTCGGGCAGAATTAAGCCAACCCGGCTCCCTACTTGGCGACGATCAAATCTATAATGTTATCGTCACTGCCCA
CGCATTCGTAATAATCTTCTTCATGGTAATACCAATCATAATTGGTGGCTTTGGTAACTGATTAGTCCCGCTTATAATCG
GAGCACCAGATATGGCATTTCCACGAATAAATAATATGAGCTTCTGATTACTCCCTCCCTCCTTTCTCTTGTTACTAGCT
TCCTCCGGAGTTGAAGCCGGGGCCGGAACAGGATGAACTGTATACCCGCCCCTTGCTGGAAATTTAGCCCACGCAGGAGC
TTCAGTTGACCTCACCATCTTCTCCCTGCACCTAGCCGGGATTTCTTCAATTCTAGGCGCAATTAACTTCATTACCACCA
TCATCAACATAAAACCCCCAGCAATTTCACAATACCAGACACCCTTATTCGTATGGGCAGTTTTAGTTACAGCTGTCCTA
CTACTTCTATCCCTCCCCGTGCT-CGCTGCTGGAATTACTATACTTCTCACAGACCGAAACCTTAATACCACGTTCTTTG
ACCCTGCAGGAGGAGGAGAC
>7520_2417|Astroblepus.santanderensis|COI-5P
CTACTAATTCGGGCAGAATTAAGCCAACCCGGCTCCCTACTTGGCGACGATCAAATCTATAATGTTATCGTCACTGCCCA
CGCATTCGTAATAATCTTCTTCATGGTAATACCAATCATAATTGGTGGCTTTGGTAACTGATTAGTCCCGCTTATAATCG
GAGCACCAGATATGGCATTTCCACGAATAAATAATATGAGCTTCTGATTACTCCCTCCCTCCTTTCTCTTGTTACTAGCT
TCCTCCGGAGTTGAAGCCGGGGCCGGAACAGGATGAACTGTATACCCGCCCCTTGCTGGAAATTTAGCCCACGCAGGAGC
TTCAGTTGACCTCACCATCTTCTCCCTGCACCTAGCCGGGATTTCTTCAATTCTAGGCGCAATTAACTTCATTACCACCA
TCATCAACATAAAACCCCCAGCAATTTCACAATACCAGACACCCTTATTCGTATGGGCAGTTTTAGTTACAGCTGTCCTA
CTACTTCTATCCCTCCCCGTGCT-CGCTGCTGGAATTACTATACTTCTCACAGACCGAAACCTTAATACCACGTTCTTTG
ACCCTGCAGGAGGAGGAGAC
>7521_2438|Astroblepus.latidens|COI-5P
CTACTAATTCGGGCAGAATTAAGCCAACCCGGCTCCCTACTTGGCGACGATCAAATCTATAATGTTATCGTCACTGCCCA
CGCATTCGTAATAATCTTCTTCATGGTAATACCAATCATAATTGGTGGCTTTGGTAACTGATTAGTCCCGCTTATAATCG
GAGCACCAGATATGGCATTTCCACGAATAAATAATATGAGCTTCTGATTACTCCCTCCCTCCTTTCTCTTGTTACTAGCT
TCCTCCGGAGTTGAAGCCGGGGCCGGAACAGGATGAACTGTATACCCGCCCCTTGCTGGAAATTTAGCCCACGCAGGAGC
TTCAGTTGACCTCACCATCTTCTCCCTGCACCTAGCCGGAGTTTCTTCAATTCTAGGCGCAATTAACTTCATTACCACCA
TCATCAACATAAAACCCCCAGCAATTTCACAATACCAGACACCCTTATTCGTATGGGCAGTTTTAGTTACAGCTGTCCTA
CTACTTCTATCCCTCCCCGTGCT-CGCTGCTGGAATTACTATACTTCTCACAGACCGAAACCTTAATACCACGTTCTTTG
ACCCTGCAGGAGGAGGAGAC
>7529_2420|Astroblepus.micrescens|COI-5P
TGTATTTAGTATTTGGCGCCTGAGCAGGAATAGTTGGTACAGCCCTTAGTCTACTAATCCGGGCAGAATTAAGCCAACCT
GGCTCTCTACTTGGCGACGATCAAATCTACAATGTTATCGTTACCGCACATGCTTTTGTAATAATTTTCTTTATAGTAAT
ACCAATCATAATTGGCGGCTTTGGCAACTGGCTGGTCCCCCTTATAATTGGAGCACCAGATATAGCATTTCCACGAATAA
ACAATATAAGTTTTTGACTACTGCCCCCATCATTCCTCTTACTACTTGCCTCCTCAGGAGTTGAAGCTGGGGCCGGAACA
GGGTGAACTGTATATCCCCCTCTTGCCGGGAATTTAGCTCACGCAGGGGCCTCAGTTGATCTTACCATCTTCTCACTACA
TCTGGCCGGGGTATCCTCAATTCTAGGCGCAATTAACTTCATTACCACCATTATTAACATGAAACCACCAGCAATTTCAC
AATACCAAACACCTTTATTCGTGTGAGCAGTCCTAGTTACAGCTGTCCTACTACTTCTATCCCTGCCCGTACTAGCTGCC
GGAATTACCATACTACTAACAGACCGAAACCTCAACACTACATTCTTTGACCCTGCAGGAGGAGGAGATCCAATTCTCTA
CCAACATCTATT
>8354_3873|Astroblepus.micrescens|COI-5P
TATTTAGTATTTGGCGCCTGAGCAGGAATAGTTGGTACAGCCCTTAGTCTACTAATCCGGGCAGAATTAAGCCAACCTGG
CTCTCTACTTGGCGACGATCAAATCTACAATGTTATCGTTACCGCACATGCTTTTGTAATAATTTTCTTTATAGTAATAC
CAATCATAATTGGCGGCTTTGGCAACTGGCTGGTCCCCCTTATAATTGGAGCACCAGATATAGCATTTCCACGAATAAAC
AATATAAGTTTTTGACTACTACCCCCATCATTCCTCTTACTACTTGCCTCCTCAGGAGTTGAAGCTGGGGCCGGAACAGG
GTGAACTGTATATCCCCCGCTTGCTGGGAATTTAGCTCACGCAGGGGCCTCAGTTGATCTTACCATCTTTTCACTACATC
TGGCCGGAGTATCCTCAATTCTAGGCGCAATTAACTTCATTACCACCATTATTAACATGAAACCCCCAGCAATTTCACAA
TACCAAACACCTTTATTCGTATGAGCAGTCCTAGTTACAGCTGTCCTACTACTTCTATCCCTGCCCGTACTAGCTGCCGG
AATCACCATACTACTAACAGACCGAAACCTCAACACTACATTCTTTGACCCTGCAGGGGGAGGGGATCCAATTCTCTACC
AACATCTATT
>7582_2553|Astroblepus.trifasciatus|COI-5P
NNNNNNNNNNNNNNNNNNNNNNNCCAACCCGGCTCCCTACTTGGCGACGATCAAATCTATAATGTTATCGTCACTGCCCA
CGCATTCGTAATAATCTTCTTCATGGTAATACCAATCATAATTGGTGGCTTTGGTAACTGATTAGTCCCGCTTATAATCG
GAGCACCAGATATGGCATTTCCACGAATAAATAATATGAGCTTCTGATTACTCCCTCCCTCCTTTCTCTTGTTACTAGCT
TCCTCCGGAGTTGAAGCCGGGGCCGGAACAGGATGAACTGTATACCCGCCCCTTGCTGGAAATTTAGCCCACGCAGGAGC
TTCAGTTGACCTCACCATCTTCTCCCTGCACCTAGCCGGGATTTCTTCAATTCTAGGCGCAATTAACTTCATTACCACCA
TCATCAACATAAAACCCCCAGCAATTTCACAATACCAGACACCCTTATTCGTATGGGCAGTTTTAGTTACAGCTGTCCTA
CTACTTCTATCCCTCCCCGTGCT-CGCTGCTGGAATTACTATACTTCTCACAGACCGAAACCTTAATACCACGTTCTTTG
ACCCTGCAGGAGGAGGANNN
>7522_2438|Astroblepus.latidens|COI-5P
GCTCTTAGTCTACTAATTCGGGCAGAATTAAGCCAACCCGGCTCCCTACTTGGCGACGATCAAATCTATAATGTTATCGT
CACTGCCCACGCATTCGTAATAATCTTCTTCATGGTAATACCAATCATAATTGGTGGCTTTGGTAACTGATTAGTCCCGC
TTATAATCGGAGCACCAGATATGGCATTTCCACGAATAAATAATATGAGCTTCTGATTACTCCCTCCCTCCTTTCTCTTG
TTACTAGCTTCCTCCGGAGTTGAAGCCGGGGCCGGAACAGGATGAACTGTATACCCGCCCCTTGCTGGAAATTTAGCCCA
CGCAGGAGCTTCAGTTGACCTCACCATCTTCTCCCTGCACCTAGCCGGAGTTTCTTCAATTCTAGGCGCAATTAACTTCA
TTACCACCATCATCAACATAAAACCCCCAGCAATTTCACAATACCAGACACCCTTATTCGTATGGGCAGTTTTAGTTACA
GCTGTCCTACTACTTCTATCCCTCCCCGTGCTCGCTGCTGGAATTACTATACTTCTCACAGACCGAAACCTTAATACCAC
GTTCTTTGACCCTGCAGGAGGAGGAGACCCAATTCTCTACCAACACCTCTTTTGATTCTTTG
>7531_2426|Astroblepus.latidens|COI-5P
CTACTAATTCGGGCAGAATTAAGCCAACCCGGCTCCCTACTTGGCGACGATCAAATCTATAATGTTATCGTCACTGCCCA
CGCATTCGTAATAATCTTCTTCATGGTAATACCAATCATAATTGGTGGCTTTGGTAACTGATTAGTCCCGCTTATAATCG
GAGCACCAGATATGGCATTTCCACGAATAAATAATATGAGCTTCTGATTACTCCCTCCCTCCTTTCTCTTGTTACTAGCT
TCCTCCGGAGTTGAAGCCGGGGCCGGAACAGGATGAACTGTATACCCGCCCCTTGCTGGAAATTTAGCCCACGCAGGAGC
TTCAGTTGACCTCACCATCTTCTCCCTGCACCTAGCCGGAATTTCTTCAATTCTAGGCGCAATTAACTTCATTACCACCA
TCATCAACATAAAACCCCCAGCAATTTCACAATACCAGACACCCTTATTCGTATGGGCAGTTTTAGTTACAGCTGTCCTA
CTACTTCTATCCCTCCCCGTGCT-CGCTGCTGGAATTACTATACTTCTCACAGACCGAAACCTTAATACCACGTTCTTTG
ACCCTGCAGGAGGAGGAGAC
>9001_5048|Astroblepus.chapmani|COI-5P
CCTATATTTAGTATTTGGCGCCTGAGCAGGAATAGTTGGAACAGCTCTTAGTCTACTAATTCGGGCAGAATTAAGCCAAC
CCGGCTCCCTACTTGGCGACGATCAAATCTATAATGTTATCGTCACTGCCCACGCATTCGTAATAATCTTCTTCATGGTA
ATACCAATCATAATTGGTGGCTTTGGTAACTGATTAGTCCCGCTTATAATCGGAGCACCAGATATGGCATTTCCACGAAT
AAATAATATGAGCTTCTGATTACTCCCTCCCTCCTTTCTCTTGTTACTAGCTTCCTCCGGAGTTGAAGCCGGGGCCGGAA
CAGGATGAACTGTATACCCGCCCCTTGCTGGAAATTTAGCCCACGCAGGAGCTTCAGTTGACCTCACCATCTTCTCCCTG
CACCTAGCCGGGATTTCTTCAATTCTAGGCGCAATTAACTTCATTACCACCATCATCAACATAAAACCCCCAGCAATTTC
ACAATACCAGACACCCTTATTCGTATGGGCAGTTTTAGTTACAGCTGTCCTACTACTTCTATCCCTCCCCGTGCTCGCTG
CTGGAATTACTATACTTCTCACAGACCGAAACCTTAATACCACGTTCTTTGACCCTGCAGGAGGAGGAGACCCAATTCTC
TACCAACACCTCTTT
>9049_5065|Astroblepus.chapmani|COI-5P
ACCCTATATTTAGTATTTGGCGCCTGAGCAGGAATAGTTGGAACAGCTCTTAGTCTACTAATTCGGGCAGAATTAAGCCA
ACCCGGCTCCCTACTTGGCGACGATCAAATCTATAATGTTATCGTCACTGCCCACGCATTCGTAATAATCTTCTTCATGG
TAATACCAATCATAATTGGTGGCTTTGGTAACTGATTAGTCCCGCTTATAATCGGAGCACCAGATATGGCATTTCCACGA
ATAAATAATATGAGCTTCTGATTACTCCCTCCCTCCTTTCTCTTGTTACTAGCTTCCTCCGGAGTTGAAGCCGGGGCCGG
AACAGGATGAACTGTATACCCGCCCCTTGCTGGAAATTTAGCCCACGCAGGAGCTTCAGTTGACCTCACCATCTTCTCCC
TGCACCTAGCCGGGATTTCTTCAATTCTAGGCGCAATTAACTTCATTACCACCATCATCAACATAAAACCCCCAGCAATT
TCACAATACCAGACACCCTTATTCGTATGGGCAGTTTTAGTTACAGCTGTCCTACTACTTCTATCCCTCCCCGTGCTCGC
TGCTGGAATTACTATACTTCTCACAGACCGAAACCTTAATACCACGTTCTTTGACCCTGCAGGAGGAGGAGACCCAATTC
TCTACCAACACCTC
>9050_5065|Astroblepus.chapmani|COI-5P
CTACTAATTCGGGCAGAATTAAGCCAACCCGGCTCCCTACTTGGCGACGATCAAATCTATAATGTTATCGTCACTGCCCA
CGCATTCGTAATAATCTTCTTCATGGTAATACCAATCATAATTGGTGGCTTTGGTAACTGATTAGTCCCGCTTATAATCG
GAGCACCAGATATGGCATTTCCACGAATAAATAATATGAGCTTCTGATTACTCCCTCCCTCCTTTCTCTTGTTACTAGCT
TCCTCCGGAGTTGAAGCCGGGGCCGGAACAGGATGAACTGTATACCCGCCCCTTGCTGGAAATTTAGCCCACGCAGGAGC
TTCAGTTGACCTCACCATCTTCTCCCTGCACCTAGCCGGAATTTCTTCAATTCTAGGCGCAATTAACTTCATTACCACCA
TCATCAACATAAAACCCCCAGCAATTTCACAATACCAGACACCCTTATTCGTATGGGCAGTTTTAGTTACAGCTGTCCTA
CTACTTCTATCCCTCCCCGTGCT-CGCTGCTGGAATTACTATACTTCTCACAGACCGAAACCTTAATACCACGTTCTTTG
ACCCTGCAGGAGGAGGAGAC
>8100_3632|Astroblepus.chapmani|COI-5P
CTACTAATTCGGGCAGAATTAAGCCAACCCGGCTCCCTACTTGGCGACGATCAAATCTATAATGTTATCGTCACTGCCCA
CGCATTCGTAATAATCTTCTTCATGGTAATACCAATCATAATTGGTGGCTTTGGTAACTGATTAGTCCCGCTTATAATCG
GAGCACCAGATATGGCATTTCCACGAATAAATAATATGAGCTTCTGATTACTCCCTCCCTCCTTTCTCTTGTTACTAGCT
TCCTCCGGAGTTGAAGCCGGGGCCGGAACAGGATGAACTGTATACCCGCCCCTTGCTGGAAATTTAGCCCACGCAGGAGC
TTCAGTTGACCTCACCATCTTCTCCCTGCACCTAGCCGGAATTTCTTCAATTCTAGGCGCAATTAACTTCATTACCACCA
TCATCAACATAAAACCCCCAGCAATTTCACAATACCAGACACCCTTATTCGTATGGGCAGTTTTAGTTACAGCTGTCCTA
CTACTTCTATCCCTCCCCGTGCT-CGCTGCTGGAATTACTATACTTCTCACAGACCGAAACCTTAATACCACGTTCTTTG
ACCCTGCAGGAGGAGGAGAC
>7530_2416|Astroblepus.unifasciatus|COI-5P
CTACTAATTCGGGCAGAATTAAGCCAACCCGGCTCCCTACTTGGCGACGATCAAATCTATAATGTTATCGTCACTGCCCA
CGCATTCGTAATAATCTTCTTCATGGTAATACCAATCATAATTGGTGGCTTTGGTAACTGATTAGTCCCGCTTATAATCG
GAGCACCAGATATGGCATTTCCACGAATAAATAATATGAGCTTCTGATTACTCCCTCCCTCCTTTCTCTTGTTACTAGCT
TCCTCCGGAGTTGAAGCCGGGGCCGGAACAGGATGAACTGTATACCCGCCCCTTGCTGGAAATTTAGCCCACGCAGGAGC
TTCAGTTGACCTCACCATCTTCTCCCTGCACCTAGCCGGGATTTCTTCAATTCTAGGCGCAATTAACTTCATTACCACCA
TCATCAACATAAAACCCCCAGCAATTTCACAATACCAGACACCCTTATTCGTATGGGCAGTTTTAGTTACAGCTGTCCTA
CTACTTCTATCCCTCCCCGTGCT-CGCTGCTGGAATTACTATACTTCTCACAGACCGAAACCTTAATACCACGTTCTTTG
ACCCTGCAGGAGGAGGAGAC
>9052_5066|Astroblepus.sp|COI-5P
CTACTAATTCGGGCAGAATTAAGCCAACCCGGCTCCCTACTTGGCGACGATCAAATCTATAATGTTATCGTCACTGCCCA
CGCATTCGTAATAATCTTCTTCATGGTAATACCAATCATAATTGGTGGCTTTGGTAACTGATTAGTCCCGCTTATAATCG
GAGCACCAGATATGGCATTTCCACGAATAAATAATATGAGCTTCTGATTACTCCCTCCCTCCTTTCTCTTGTTACTAGCT
TCCTCCGGAGTTGAAGCCGGGGCCGGAACAGGATGAACTGTATACCCGCCCCTTGCTGGAAATTTAGCCCACGCAGGAGC
TTCAGTTGACCTCACCATCTTCTCCCTGCACCTAGCCGGGATTTCTTCAATTCTAGGCGCAATTAACTTCATTACCACCA
TCATCAACATAAAACCCCCAGCAATTTCACAATACCAGACACCCTTATTCGTATGGGCAGTTTTAGTTACAGCTGTCCTA
CTACTTCTATCCCTCCCCGTGCT-CGCTGCTGGAATTACTATACTTCTCACAGACCGAAACCTTAATACCACGTTCTTTG
ACCCTGCAGGAGGAGGAGAC
>7475_2211|Astroblepus.chapmani|COI-5P
CTATATTTAGTATTTGGCGCCTGAGCAGGAATAGTTGGAACAGCTCTTAGTCTACTAATTCGGGCAGAATTAAGCCAACC
CGGCTCCCTACTTGGCGACGATCAAATCTATAATGTTATCGTCACTGCCCACGCATTCGTAATAATCTTCTTCATGGTAA
TACCAATCATAATTGGTGGCTTTGGTAACTGATTAGTCCCGCTTATAATCGGAGCACCAGATATGGCATTTCCACGAATA
AATAATATGAGCTTCTGATTACTCCCTCCCTCCTTTCTCTTGTTACTAGCTTCCTCCGGAGTTGAAGCCGGGGCCGGAAC
AGGATGAACTGTATACCCGCCCCTTGCTGGAAATTTAGCCCACGCAGGAGCTTCAGTTGACCTCACCATCTTCTCCCTGC
ACCTAGCCGGGATTTCTTCAATTCTAGGCGCAATTAACTTCATTACCACCATCATCAACATAAAACCCCCAGCAATTTCA
CAATACCAGACACCCTTATTCGTATGGGCAGTTTTAGTTACAGCTGTCCTACTACTTCTATCCCTCCCCGTGCTCGCTGC
TGGAATTACTATACTTCTCACAGACCGAAACCTTAATACCACGTTCTTTGACCCTGCAGGAGGAGGAGACCCAATTCTCT
ACCAACACCTCTTT
>7508_2421|Astroblepus.chapmani|COI-5P
CNTATATTTAGTATTTGGNGCTTGANCAGGAATAGTNGGAACAGCTCTTAGTCTACTAATTCGGGCAGAATTAAGCCAAC
CCGGCTCCCTACTTGGCGACGATCAAATCTATAATGTTATCGTCACTGCCCACGCATTCGTAATAATCTTCTTCATGGTA
ATACCAATCATAATTGGTGGCTTTGGTAACTGATTAGTCCCGCTTATAATCGGAGCACCAGATATGGCATTTCCACGAAT
AAATAATATGAGCTTCTGATTACTCCCTCCCTCCTTTCTCTTGTTACTAGCTTCCTCCGGAGTTGAAGCCGGGGCCGGAA
CAGGATGAACTGTATACCCGCCCCTTGCTGGAAATTTAGCCCACGCAGGAGCTTCAGTTGACCTCACCATCTTCTCCCTG
CACCTAGCCGGGATTTCTTCAATTCTAGGCGCAATTAACTTCATTACCACCATCATCAACATAAAACCCCCAGCAATTTC
ACAATACCAGACACCCTTATTCGTATGGGCAGTTTTAGTTACAGCTGTCCTACTACTTCTATCCCTCCCCGTGCTCGCTG
CTGGAATTACTATACTTCTCACAGACCGAAACCTTAATACCACGTTCTTTGACCCTGCAGGAGGAGGAGACCCAATTCTC
TACCAA
>7509_2421|Astroblepus.chapmani|COI-5P
CTACTAATTCGGGCAGAATTAAGCCAACCCGGCTCCCTACTTGGCGACGATCAAATCTATAATGTTATCGTCACTGCCCA
CGCATTCGTAATAATCTTCTTCATGGTAATACCAATCATAATTGGTGGCTTTGGTAACTGATTAGTCCCGCTTATAATCG
GAGCACCAGATATGGCATTTCCACGAATAAATAATATGAGCTTCTGATTACTCCCTCCCTCCTTTCTCTTGTTACTAGCT
TCCTCCGGAGTTGAAGCCGGGGCCGGAACAGGATGAACTGTATACCCGCCCCTTGCTGGAAATTTAGCCCACGCAGGAGC
TTCAGTTGACCTCACCATCTTCTCCCTGCACCTAGCCGGGATTTCTTCAATTCTAGGCGCAATTAACTTCATTACCACCA
TCATCAACATAAAACCCCCAGCAATTTCACAATACCAGACACCCTTATTCGTATGGGCAGTTTTAGTTACAGCTGTCCTA
CTACTTCTATCCCTCCCCGTGCT-CGCTGCTGGAATTACTATACTTCTCACAGACCGAAACCTTAATACCACGTTCTTTG
ACCCTGCAGGAGGAGGAGAC
>9051_5065|Astroblepus.chapmani|COI-5P
CTACTAATTCGGGCAGAATTAAGCCAACCCGGCTCCCTACTTGGCGACGATCAAATCTATAATGTTATCGTCACTGCCCA
CGCATTCGTAATAATCTTCTTCATGGTAATACCAATCATAATTGGTGGCTTTGGTAACTGATTAGTCCCGCTTATAATCG
GAGCACCAGATATGGCATTTCCACGAATAAATAATATGAGCTTCTGATTACTCCCTCCCTCCTTTCTCTTGTTACTAGCT
TCCTCCGGAGTTGAAGCCGGGGCCGGAACAGGATGAACTGTATACCCGCCCCTTGCTGGAAATTTAGCCCACGCAGGAGC
TTCAGTTGACCTCACCATCTTCTCCCTGCACCTAGCCGGGATTTCTTCAATTCTAGGCGCAATTAACTTCATTACCACCA
TCATCAACATAAAACCCCCAGCAATTTCACAATACCAGACACCCTTATTCGTATGGGCAGTTTTAGTTACAGCTGTCCTA
CTACTTCTATCCCTCCCCGTGCT-CGCTGCTGGAATTACTATACTTCTCACAGACCGAAACCTTAATACCACGTTCTTTG
ACCCTGCAGGAGGAGGAGAC
>7471_2205|Astroblepus.supramollis|COI-5P
NNNNNNNNNNNNNCAGAATTAAGCCAACCCGGCTCCCTACTTGGCGACGATCAAATCTACAATGTAATCGTCACCGCACA
TGCTTTCGTAATAATCTTCTTCATAGTAATACCAATCATAATTGGCGGCTTTGGTAACTGACTAGTTCCACTTATAATCG
GAGCACCAGACATGGCATTCCCACGAATAAACAATATAAGCTTCTGACTGCTCCCTCCATCCTTTCTCTTGCTATTAGCT
TCCTCCGGAGTTGAAGCCGGGGCCGGAACAGGGTGAACAGTATACCCCCCGCTTGCTGGAAATTTAGCTCACGCAGGAGC
TTCAGTAGACCTCACCATCTTTTCTCTCCACCTGGCCGGTATCTCTTCAATTCTAGGAGCAATTAACTTCATTACCACCA
TCATTAACATAAAACCCCCTGCAATTTCACAATACCAAACACCCTTGTTCGTATGAGCAGTTTTAGTTACAGCTGTCCTA
CTACTTCTATCCCTCCCCGTGCT-CGCTGCGGGAATCACCATGCTACTAACAGACCGAAACCTAAATACTACATTCTTTG
ACCCTGCAGGAGGAGGGGAC
>7528_2413|Astroblepus.supramollis|COI-5P
CTACTAATTCGAGCAGAATTAAGCCAACCCGGCTCCCTACTTGGCGACGATCAAATCTACAATGTAATCGTCACCGCACA
TGCTTTCGTAATAATCTTCTTCATAGTAATACCAATCATAATTGGCGGCTTTGGTAACTGACTAGTTCCACTTATAATCG
GAGCACCAGACATGGCATTCCCACGAATAAACAATATAAGCTTCTGACTGCTCCCTCCATCCTTTCTCTTGCTATTAGCT
TCCTCCGGAGTTGAAGCCGGGGCCGGAACAGGGTGAACAGTATACCCCCCGCTTGCTGGAAATTTAGCTCACGCAGGAGC
TTCAGTAGACCTCACCATCTTTTCTCTCCACCTGGCCGGTATCTCTTCAATTCTAGGAGCAATTAACTTCATTACCACCA
TCATTAACATAAAACCCCCTGCAATTTCACAATACCAAACACCCTTGTTCGTATGAGCAGTTTTAGTTACAGCTGTCCTA
CTACTTCTATCCCTCCCCGTGCT-CGCTGCGGGAATCACCATGCTACTAACAGACCGAAACCTAAATACTACATTCTTTG
ACCCTGCAGGAGGAGGGGAC
>7464_2206|Astroblepus.unifasciatus|COI-5P
CTACTAATTCGAGCAGAATTAAGCCAACCCGGCTCCCTACTTGGCGACGATCAAATCTACAATGTAATCGTCACCGCACA
TGCTTTCGTAATAATCTTCTTCATAGTAATACCAATCATAATTGGCGGCTTTGGTAACTGACTAGTTCCACTTATAATCG
GAGCACCAGACATGGCATTCCCACGAATAAACAATATAAGCTTCTGACTGCTCCCTCCATCCTTTCTCTTGCTATTAGCT
TCCTCCGGAGTTGAAGCCGGGGCCGGAACAGGGTGAACAGTATACCCCCCGCTTGCTGGAAATTTAGCTCACGCAGGAGC
TTCAGTAGACCTCACCATCTTTTCTCTCCACCTGGCCGGTATCTCTTCAATTCTAGGAGCAATTAACTTCATTACCACCA
TCATTAACATAAAACCCCCTGCAATTTCACAATACCAAACACCCTTGTTCGTATGAGCAGTTTTAGTTACAGCTGTCCTA
CTACTTCTATCCCTCCCCGTGCT-CGCTGCGGGAATCACCATGCTACTAACAGACCGAAACCTAAATACTACATTCTTTG
ACCCTGCAGGAGGAGGGGAC
>7472_2236|Astroblepus.trifasciatus|COI-5P
CTACTAATTCGAGCAGAATTAAGCCAACCCGGCTCCCTACTTGGCGACGATCAAATCTACAATGTAATCGTCACCGCACA
TGCTTTCGTAATAATCTTCTTCATAGTAATACCAATCATAATTGGCGGCTTTGGTAACTGACTAGTTCCACTTATAATCG
GAGCACCAGACATGGCATTCCCACGAATAAACAATATAAGCTTCTGACTGCTCCCTCCATCCTTTCTCTTGCTATTAGCT
TCCTCCGGAGTTGAAGCCGGGGCCGGAACAGGGTGAACAGTATACCCCCCGCTTGCTGGAAATTTAGCTCACGCAGGAGC
TTCAGTAGACCTCACCATCTTTTCTCTCCACCTGGCCGGTATCTCTTCAATTCTAGGAGCAATTAACTTCATTACCACCA
TCATTAACATAAAACCCCCTGCAATTTCACAATACCAAACACCCTTGTTCGTATGAGCAGTTTTAGTTACAGCTGTCCTA
CTACTTCTATCCCTCCCCGTGCT-CGCTGCGGGAATCACCATGCTACTAACAGACCGAAACCTAAATACTACATTCTTTG
ACCCTGCAGGAGGAGGGGAC
>7664_2968|Astroblepus.trifasciatus|COI-5P
NNNNNNNNNNNNNNNNNNNNNNNCCAACCCGGCTCCCTACTTGGCGACGATCAAATCTACAATGTAATCGTCACCGCACA
TGCTTTCGTAATAATCTTCTTCATAGTAATACCAATCATAATTGGCGGCTTTGGTAACTGACTAGTTCCACTTATAATCG
GAGCACCAGACATGGCATTCCCACGAATAAACAATATAAGCTTCTGACTGCTCCCTCCATCCTTTCTCTTGCTATTAGCT
TCCTCCGGAGTTGAAGCCGGGGCCGGAACAGGGTGAACAGTATACCCCCCGCTTGCTGGAAATTTAGCTCACGCAGGAGC
TTCAGTAGACCTCACCATCTTTTCTCTCCACCTGGCCGGTATCTCTTCAATTCTAGGAGCAATTAACTTCATTACCACCA
TCATTAACATAAAACCCCCTGCAATTTCACAATACCAAACACCCTTGTTCGTATGAGCAGTTTTAGTTACAGCTGTCCTA
CTACTTCTATCCCTCCCCGTGCT-CGCTGCGGGAATCACCATGCTACTAACAGACCGAAACCTAAATACTACATTCTTTG
ACCCTGCAGGAGGAGGGNNN
>7460_2207|Astroblepus.trifasciatus|COI-5P
CTACTAATTCGAGCAGAATTAAGCCAACCCGGCTCCCTACTTGGCGACGATCAAATCTACAATGTAATCGTCACCGCACA
TGCTTTCGTAATAATCTTCTTCATAGTAATACCAATCATAATTGGCGGCTTTGGTAACTGACTAGTTCCACTTATAATCG
GAGCACCAGACATGGCATTCCCACGAATAAACAATATAAGCTTCTGACTGCTCCCTCCATCCTTTCTCTTGCTATTAGCT
TCCTCCGGAGTTGAAGCCGGGGCCGGAACAGGGTGAACAGTATACCCCCCGCTTGCTGGAAATTTAGCTCACGCAGGAGC
TTCAGTAGACCTCACCATCTTTTCTCTCCACCTGGCCGGTATCTCTTCAATTCTAGGAGCAATTAACTTCATTACCACCA
TCATTAACATAAAACCCCCTGCAATTTCACAATACCAAACACCCTTGTTCGTATGAGCAGTTTTAGTTACAGCTGTCCTA
CTACTTCTATCCCTCCCCGTGCT-CGCTGCGGGAATCACCATGCTACTAACAGACCGAAACCTAAATACTACATTCTTTG
ACCCTGCAGGAGGAGGGGAC
>7466_2212|Astroblepus.supramollis|COI-5P
CTACTAATTCGAGCAGAATTAAGCCAACCCGGCTCCCTACTTGGCGACGATCAAATCTACAATGTAATCGTCACCGCACA
TGCTTTCGTAATAATCTTCTTCATAGTAATACCAATCATAATTGGCGGCTTTGGTAACTGACTAGTTCCACTTATAATCG
GAGCACCAGACATGGCATTCCCACGAATAAACAATATAAGCTTCTGACTGCTCCCTCCATCCTTTCTCTTGCTATTAGCT
TCCTCCGGAGTTGAAGCCGGGGCCGGAACAGGGTGAACAGTATACCCCCCGCTTGCTGGAAATTTAGCTCACGCAGGAGC
TTCAGTAGACCTCACCATCTTTTCTCTCCACCTGGCCGGTATCTCTTCAATTCTAGGAGCAATTAACTTCATTACCACCA
TCATTAACATAAAACCCCCTGCAATTTCACAATACCAAACACCCTTGTTCGTATGAGCAGTTTTAGTTACAGCTGTCCTA
CTACTTCTATCCCTCCCCGTGCT-CGCTGCGGGAATCACCATGCTACTAACAGACCGAAACCTAAATACTACATTCTTTG
ACCCTGCAGGAGGAGGGNNN
>7931_4229|Astroblepus.unifasciatus|COI-5P
CTATATTTAGTATTTGGCGCCTGAGCAGGAATAGTTGGGACAGCTCTTAGTCTACTAATTCGAGCAGAATTAAGCCAACC
CGGCTCCCTACTTGGCGACGATCAAATCTACAATGTAATCGTCACCGCACATGCTTTCGTAATAATCTTCTTCATAGTAA
TACCAATCATAATTGGCGGCTTTGGTAACTGACTAGTTCCACTTATAATCGGAGCACCAGACATGGCATTCCCACGAATA
AACAATATAAGCTTCTGACTGCTCCCTCCATCCTTTCTCTTGCTATTAGCTTCCTCCGGAGTTGAAGCCGGGGCCGGAAC
AGGGTGAACAGTATACCCCCCGCTTGCTGGAAATTTAGCTCACGCAGGAGCTTCAGTAGACCTCACCATCTTTTCTCTCC
ACCTGGCCGGTATCTCTTCAATTCTAGGAGCAATTAACTTCATTACCACCATCATTAACATAAAACCCCCTGCAATTTCA
CAATACCAAACACCCTTGTTCGTATGAGCAGTTTTAGTTACAGCTGTCCTACTACTTCTATCCCTCCCCGTGCTCGCTGC
GGGAATCACCATGCTACTAACAGACCGAAACCTAAATACTACATTCTTTGACCCTGCAGGAGGAGGGGACCCAATTC
>8082_3620|Astroblepus.unifasciatus|COI-5P
CTATATTTAGTATTTGGCGCCTGAGCAGGAATAGTTGGGACAGCTCTTAGTCTACTAATTCGAGCAGAATTAAGCCAACC
CGGCTCCCTACTTGGCGACGATCAAATCTACAATGTAATCGTCACCGCACATGCTTTCGTAATAATCTTCTTCATAGTAA
TACCAATCATAATTGGCGGCTTTGGTAACTGACTAGTTCCACTTATAATCGGAGCACCAGACATGGCATTCCCACGAATA
AACAATATAAGCTTCTGACTGCTCCCTCCATCCTTTCTCTTGCTATTAGCTTCCTCCGGAGTTGAAGCCGGGGCCGGAAC
AGGGTGAACAGTATACCCCCCGCTTGCTGGAAATTTAGCTCACGCAGGAGCTTCAGTAGACCTCACCATCTTTTCTCTCC
ACCTGGCCGGTATCTCTTCAATTCTAGGAGCAATTAACTTCATTACCACCATCATTAACATAAAACCCCCTGCAATTTCA
CAATACCAAACACCCTTGTTCGTATGAGCAGTTTTAGTTACAGCTGTCCTACTACTTCTATCCCTCCCCGTGCTCGCTGC
GGGAATCACCATGCTACTAACAGACCGAAACCTAAATACTACATTCTTTGACCCTGCAGGAGGAGGGGACCCAATTC
>9031_5059|Astroblepus.sp|COI-5P
CTACTAATTCGAGCAGAATTAAGCCAACCCGGCTCCCTACTTGGCGACGATCAAATCTACAATGTAATCGTCACCGCACA
TGCTTTCGTAATAATCTTCTTCATAGTAATACCAATCATAATTGGCGGCTTTGGTAACTGACTAGTTCCACTTATAATCG
GAGCACCAGACATGGCATTCCCACGAATAAACAATATAAGCTTCTGACTGCTCCCTCCATCCTTTCTCTTGCTATTAGCT
TCCTCCGGAGTTGAAGCCGGGGCCGGAACAGGGTGAACAGTATACCCCCCGCTTGCTGGAAATTTAGCTCACGCAGGAGC
TTCAGTAGACCTCACCATCTTTTCTCTCCACCTGGCCGGTATCTCTTCAATTCTAGGAGCAATTAACTTCATTACCACCA
TCATTAACATAAAACCCCCTGCAATTTCACAATACCAAACACCCTTGTTCGTATGAGCAGTTTTAGTTACAGCTGTCCTA
CTACTTCTATCCCTCCCCGTGCT-CGCTGCGGGAATCACCATGCTACTAACAGACCGAAACCTAAATACTNNNNNNNNNN
NNNNNNNNNNNNNNNNNNNN
>9053_5066|Astroblepus.sp|COI-5P
GAGCAGGAATAGTTGGTACAGCCCTTAGTCTACTAATCCGGGCAGAATTAAGCCAACCTGGCTCTCTACTTGGCGACGAT
CAAATCTACAATGTTATCGTTACCGCACATGCTTTTGTAATAATTTTCTTTATAGTAATACCAATCATAATTGGCGGCTT
TGGCAACTGGCTGGTCCCCCTTATAATTGGAGCACCAGATATAGCATTTCCACGAATAAACAATATAAGTTTTTGACTAC
TGCCCCCATCATTCCTCTTACTACTTGCCTCCTCAGGAGTTGAAGCTGGGGCCGGAACAGGGTGAACTGTATATCCCCCT
CTTGCCGGGAATTTAGCTCACGCAGGGGCCTCAGTTGATCTTACCATCTTCTCACTACATCTGGCCGGGGTATCCTCAAT
TCTAGGCGCAATTAACTTCATTACCACCATTATTAACATGAAACCACCAGCAATTTCACAATACCAAACACCTTTATTCG
TGTGAGCAGTCCTAGTTACAGCTGTCCTACTACTTCTATCCCTGCCCGTACTAGCTGCCGGAATTACCATACTACTAACA
GACCGAAACCTCAACACTACATTCTTTGACCCTGCAGGAGGAGGAGATCCAATT
>9054_5067|Astroblepus.sp|COI-5P
CTACTAATTCGAGCAGAATTAAGCCAACCCGGCTCCCTACTTGGCGACGATCAAATCTACAATGTAATCGTCACCGCACA
TGCTTTCGTAATAATCTTCTTCATAGTAATACCAATCATAATTGGCGGCTTTGGTAACTGACTAGTTCCACTTATAATCG
GAGCACCAGACATGGCATTCCCACGAATAAACAATATAAGCTTCTGACTGCTCCCTCCATCCTTTCTCTTGCTATTAGCT
TCCTCCGGAGTTGAAGCCGGGGCCGGAACAGGGTGAACAGTATACCCCCCGCTTGCTGGAAATTTAGCTCACGCAGGAGC
TTCAGTAGACCTCACCATCTTTTCTCTCCACCTGGCCGGTATCTCTTCAATTCTAGGAGCAATTAACTTCATTACCACCA
TCATTAACATAAAACCCCCTGCAATTTCACAATACCAAACACCCTTGTTCGTATGAGCAGTTTTAGTTACAGCTGTCCTA
CTACTTCTATCCCTCCCCGTGCTACGCTGCGGGAATCACCATGCTACTAACAGNNNNNNNNNNNNNNNNNNNNNNNNNNN
NNNNNNNNNNNNNNNNNNNN
>9029_5059|Astroblepus.sp|COI-5P
GAGCAGGAATAGTTGGGACAGCTCTTAGTCTACTAATTCGAGCAGAATTAAGCCAACCCGGCTCCCTACTTGGCGACGAT
CAAATCTACAATGTAATCGTCACCGCACATGCTTTCGTAATAATCTTCTTCATAGTAATACCAATCATAATTGGCGGCTT
TGGTAACTGACTAGTTCCACTTATAATCGGAGCACCAGACATGGCATTCCCACGAATAAACAATATAAGCTTCTGACTGC
TCCCTCCATCCTTTCTCTTGCTATTAGCTTCCTCCGGAGTTGAAGCCGGGGCCGGAACAGGGTGAACAGTATACCCCCCG
CTTGCTGGAAATTTAGCTCACGCAGGAGCTTCAGTAGACCTCACCATCTTTTCTCTCCACCTGGCCGGTATCTCTTCAAT
TCTAGGAGCAATTAACTTCATTACCACCATCATTAACATAAAACCCCCTGCAATTTCACAATACCAAACACCCTTGTTCG
TATGAGCAGTTTTAGTTACAGCTGTCCTACTACTTCTATCCCTCCCCGTGCTCGCTGCGGGAATCACCATGCTACTAACA
GACCGAAACCTAAATACTACATTCTTTGACCCTGCAGGAGGAGGGGACCCAATT
>9030_5059|Astroblepus.sp|COI-5P
CTACTAATTCGAGCAGAATTAAGCCAACCCGGCTCCCTACTTGGCGACGATCAAATCTACAATGTAATCGTCACCGCACA
TGCTTTCGTAATAATCTTCTTCATAGTAATACCAATCATAATTGGCGGCTTTGGTAACTGACTAGTTCCACTTATAATCG
GAGCACCAGACATGGCATTCCCACGAATAAACAATATAAGCTTCTGACTGCTCCCTCCATCCTTTCTCTTGCTATTAGCT
TCCTCCGGAGTTGAAGCCGGGGCCGGAACAGGGTGAACAGTATACCCCCCGCTTGCTGGAAATTTAGCTCACGCAGGAGC
TTCAGTAGACCTCACCATCTTTTCTCTCCACCTGGCCGGTATCTCTTCAATTCTAGGAGCAATTAACTTCATTACCACCA
TCATTAACATAAAACCCCCTGCAATTTCACAATACCAAACACCCTTGTTCGTATGAGCAGTTTTAGTTACAGCTGTCCTA
CTACTTCTATCCCTCCCCGTGCT-CGCTGCGGGAATCACCATGCTACTAACAGACCGAAACCTAAATACNNNNNNNNNNN
NNNNNNNNNNNNNNNNNNNN
>9004_5050|Astroblepus.sp|COI-5P
GAGCAGGAATAGTTGGGACAGCTCTTAGTCTACTAATTCGAGCAGAATTAAGCCAACCCGGCTCCCTACTTGGCGACGAT
CAAATCTACAATGTAATCGTCACCGCACATGCTTTCGTAATAATCTTCTTCATAGTAATACCAATCATAATTGGCGGCTT
TGGTAACTGACTAGTTCCACTTATAATCGGAGCACCAGACATGGCATTCCCACGAATAAACAATATAAGCTTCTGACTGC
TCCCTCCATCCTTTCTCTTGCTATTAGCTTCCTCCGGAGTTGAAGCCGGGGCCGGAACAGGGTGAACAGTATACCCCCCG
CTTGCTGGAAATTTAGCTCACGCAGGAGCTTCAGTAGACCTCACCATCTTTTCTCTCCACCTGGCCGGTATCTCTTCAAT
TCTAGGAGCAATTAACTTCATTACCACCATCATTAACATAAAACCCCCTGCAATTTCACAATACCAAACACCCTTGTTCG
TATGAGCAGTTTTAGTTACAGCTGTCCTACTACTTCTATCCCTCCCCGTGCTCGCTGCGGGAATCACCATGCTACTAACA
GACCGAAACCTAAATACTACATTCTTTGACCCTGCAGGAGGAGGGGACCCAATT
>9005_5050|Astroblepus.sp|COI-5P
GAGCAGGAATAGTTGGGACAGCTCTTAGTCTACTAATTCGAGCAGAATTAAGCCAACCCGGCTCCCTACTTGGCGACGAT
CAAATCTACAATGTAATCGTCACCGCACATGCTTTCGTAATAATCTTCTTCATAGTAATACCAATCATAATTGGCGGCTT
TGGTAACTGACTAGTTCCACTTATAATCGGAGCACCAGACATGGCATTCCCACGAATAAACAATATAAGCTTCTGACTGC
TCCCTCCATCCTTTCTCTTGCTATTAGCTTCCTCCGGAGTTGAAGCCGGGGCCGGAACAGGGTGAACAGTATACCCCCCG
CTTGCTGGAAATTTAGCTCACGCAGGAGCTTCAGTAGACCTCACCATCTTTTCTCTCCACCTGGCCGGTATCTCTTCAAT
TCTAGGAGCAATTAACTTCATTACCACCATCATTAACATAAAACCCCCTGCAATTTCACAATACCAAACACCCTTGTTCG
TATGAGCAGTTTTAGTTACAGCTGTCCTACTACTTCTATCCCTCCCCGTGCTCGCTGCGGGAATCACCATGCTACTAACA
GACCGAAACCTAAATACTACATTCTTTGACCCTGCAGGAGGAGGGGACCCAATT
>9008_5052|Astroblepus.sp|COI-5P
GAGCAGGAATAGTTGGGACAGCTCTTAGTCTACTAATTCGAGCAGAATTAAGCCAACCCGGCTCCCTACTTGGCGACGAT
CAAATCTACAATGTAATCGTCACCGCACATGCTTTCGTAATAATCTTCTTCATAGTAATACCAATCATAATTGGCGGCTT
TGGTAACTGACTAGTTCCACTTATAATCGGAGCACCAGACATGGCATTCCCACGAATAAACAATATAAGCTTCTGACTGC
TCCCTCCATCCTTTCTCTTGCTATTAGCTTCCTCCGGAGTTGAAGCCGGGGCCGGAACAGGGTGAACAGTATACCCCCCG
CTTGCTGGAAATTTAGCTCACGCAGGAGCTTCAGTAGACCTCACCATCTTTTCTCTCCACCTGGCCGGTATCTCTTCAAT
TCTAGGAGCAATTAACTTCATTACCACCATCATTAACATAAAACCCCCTGCAATTTCACAATACCAAACACCCTTGTTCG
TATGAGCAGTTTTAGTTACAGCTGTCCTACTACTTCTATCCCTCCCCGTGCTCGCTGCGGGAATCACCATGCTACTAACA
GACCGAAACCTAAATACTACATTCTTTGACCCTGCAGGAGGAGGGGACCCAATT
>9009_5052|Astroblepus.sp|COI-5P
GAGCAGGAATAGTTGGGACAGCTCTTAGTCTACTAATTCGAGCAGAATTAAGCCAACCCGGCTCCCTACTTGGCGACGAT
CAAATCTACAATGTAATCGTCACCGCACATGCTTTCGTAATAATCTTCTTCATAGTAATACCAATCATAATTGGCGGCTT
TGGTAACTGACTAGTTCCACTTATAATCGGAGCACCAGACATGGCATTCCCACGAATAAACAATATAAGCTTCTGACTGC
TCCCTCCATCCTTTCTCTTGCTATTAGCTTCCTCCGGAGTTGAAGCCGGGGCCGGAACAGGGTGAACAGTATACCCCCCG
CTTGCTGGAAATTTAGCTCACGCAGGAGCTTCAGTAGACCTCACCATCTTTTCTCTCCACCTGGCCGGTATCTCTTCAAT
TCTAGGAGCAATTAACTTCATTACCACCATCATTAACATAAAACCCCCTGCAATTTCACAATACCAAACACCCTTGTTCG
TATGAGCAGTTTTAGTTACAGCTGTCCTACTACTTCTATCCCTCCCCGTGCTCGCTGCGGGAATCACCATGCTACTAACA
GACCGAAACCTAAATACTACATTCTTTGACCCTGCAGGAGGAGGGGACCCAATT
>7930_4229|Astroblepus.unifasciatus|COI-5P
CTACTAATTCGAGCAGAATTAAGCCAACCCGGCTCCCTACTTGGCGACGATCAAATCTACAATGTAATCGTCACCGCACA
TGCTTTCGTAATAATCTTCTTCATAGTAATACCAATCATAATTGGCGGCTTTGGTAACTGACTAGTTCCACTTATAATCG
GAGCACCAGACATGGCATTCCCACGAATAAACAATATAAGCTTCTGACTGCTCCCTCCATCCTTTCTCTTGCTATTAGCT
TCCTCCGGAGTTGAAGCCGGGGCCGGAACAGGGTGAACAGTATACCCCCCGCTTGCTGGAAATTTAGCTCACGCAGGAGC
TTCAGTAGACCTCACCATCTTTTCTCTCCACCTGGCCGGTATCTCTTCAATTCTAGGAGCAATTAACTTCATTACCACCA
TCATTAACATAAAACCCCCTGCAATTTCACAATACCAAACACCCTTGTTCGTATGAGCAGTTTTAGTTACAGCTGTCCTA
CTACTTCTATCCCTCCCCGTGCT-CGCTGCGGGAATCACCATGCTACTAACAGACCGAAACCTAAATACTACATTCTTTG
ACCCTGCAGGAGGAGGGGAC
>7577_2551|Astroblepus.unifasciatus|COI-5P
GGGACAGCTCTTAGTCTACTAATTCGAGCAGAATTAAGCCAACCCGGCTCCCTACTTGGCGACGATCAAATCTACAATGT
AATCGTCACCGCACATGCTTTCGTAATAATCTTCTTCATAGTAATACCAATCATAATTGGCGGCTTTGGTAACTGACTAG
TTCCACTTATAATCGGAGCACCAGACATGGCATTCCCACGAATAAACAATATAAGCTTCTGACTGCTCCCTCCATCCTTT
CTCTTGCTATTAGCTTCCTCCGGAGTTGAAGCCGGGGCCGGAACAGGGTGAACAGTATACCCCCCGCTTGCTGGAAATTT
AGCTCACGCAGGAGCTTCAGTAGACCTCACCATCTTTTCTCTCCACCTGGCCGGTATCTCTTCAATTCTAGGAGCAATTA
ACTTCATTACCACCATCATTAACATAAAACCCCCTGCAATTTCACAATACCAAACACCCTTGTTCGTATGAGCAGTTTTA
GTTACAGCTGTCCTACTACTTCTATCCCTCCCCGTGCTCGCTGCGGGAATCACCATGCTACTAACAGACCGAAACCTAAA
TACTACATTCTTTGACCCTGCAGGAGGAGGGGACCCAATTC
>7597_2610|Astroblepus.unifasciatus|COI-5P
CTCTTAGTCTACTAATTCGGGCAGAATTAAGCCAACCCGGCTCCCTACTTGGCGACGATCAAATCTATAATGTTATCGTC
ACTGCCCACGCATTCGTAATAATCTTCTTCATGGTAATACCAATCATAATTGGTGGCTTTGGTAACTGATTAGTCCCGCT
TATAATCGGAGCACCAGATATGGCATTTCCACGAATAAATAATATGAGCTTCTGATTACTCCCTCCCTCCTTTCTCTTGT
TACTAGCTTCCTCCGGAGTTGAAGCCGGGGCCGGAACAGGATGAACTGTATACCCGCCCCTTGCTGGAAATTTAGCCCAC
GCAGGAGCTTCAGTTGACCTCACCATCTTCTCCCTGCACCTAGCCGGGATTTCTTCAATTCTAGGCGCAATTAACTTCAT
TACCACCATCATCAACATAAAACCCCCAGCAATTTCACAATACCAGACACCCTTATTCGTATGGGCAGTTTTAGTTACAG
CTGTCCTACTACTTCTATCCCTCCCCGTGCTCGCTGCTGGAATTACTATACTTCTCACAGACCGAAACCTTAATACCACG
TTCTTTGACCCTGCAGGAGGAGGAGACCCAATTCTCTACCAACACCTCTTTTGATTCTTTGG
>7600_2613|Astroblepus.unifasciatus|COI-5P
TTAGTCTACTAATTCGAGCAGAATTAAGCCAACCCGGCTCCCTACTTGGCGACGATCAAATCTACAATGTAATCGTCACC
GCACATGCTTTCGTAATAATCTTCTTCATAGTAATACCAATCATAATTGGCGGCTTTGGTAACTGACTAGTTCCACTTAT
AATCGGAGCACCAGACATGGCATTCCCACGAATAAACAATATAAGCTTCTGACTGCTCCCTCCATCCTTTCTCTTGCTAT
TAGCTTCCTCCGGAGTTGAAGCCGGGGCCGGAACAGGGTGAACAGTATACCCCCCGCTTGCTGGAAATTTAGCTCACGCA
GGAGCTTCAGTAGACCTCACCATCTTTTCTCTCCACCTGGCCGGTATCTCTTCAATTCTAGGAGCAATTAACTTCATTAC
CACCATCATTAACATAAAACCCCCTGCAATTTCACAATACCAAACACCCTTGTTCGTATGAGCAGTTTTAGTTACAGCTG
TCCTACTACTTCTATCCCTCCCCGTGCTCGCTGCGGGAATCACCATGCTACTAACAGACCGAAACCTAAATACTACATTC
TTTGACCCTGCAGGAGGAGGGGACCCAATTC
>9064_5070|Astroblepus.sp|COI-5P
CTACTAATTCGAGCAGAATTAAGCCAACCCGGCTCCCTACTTGGCGACGATCAAATCTACAATGTAATCGTCACCGCACA
TGCTTTCGTAATAATCTTCTTCATAGTAATACCAATCATAATTGGCGGCTTTGGTAACTGACTAGTTCCACTTATAATCG
GAGCACCAGACATGGCATTCCCACGAATAAACAATATAAGCTTCTGACTGCTCCCTCCATCCTTTCTCTTGCTATTAGCT
TCCTCCGGAGTTGAAGCCGGGGCCGGAACAGGGTGAACAGTATACCCCCCGCTTGCTGGAAATTTAGCTCACGCAGGAGC
TTCAGTAGACCTCACCATCTTTTCTCTCCACCTGGCCGGTATCTCTTCAATTCTAGGAGCAATTAACTTCATTACCACCA
TCATTAACATAAAACCCCCTGCAATTTCACAATACCAAACACCCTTGTTCGTATGAGCAGTTTTAGTTACAGCTGTCCTA
CTACTTCTATCCCTCCCCGTGCT-CGCTGCGGGAATCACCATGCTACTAACAGACCGAAACCTAAATACTACATTCTTTG
ACCCTGCAGGAGGAGGGGAC
>9063_5070|Astroblepus.sp|COI-5P
GAGCAGGAATAGTTGGTACAGCCCTTAGTCTACTAATCCGGGCAGAATTAAGCCAACCTGGCTCTCTACTTGGCGACGAT
CAAATCTACAATGTTATCGTTACCGCACATGCTTTTGTAATAATTTTCTTTATAGTAATACCAATCATAATTGGCGGCTT
TGGCAACTGGCTGGTCCCCCTTATAATTGGAGCACCAGATATAGCATTTCCACGAATAAACAATATAAGTTTTTGACTAC
TGCCCCCATCATTCCTCTTACTACTTGCCTCCTCAGGAGTTGAAGCTGGGGCCGGAACAGGGTGAACTGTATATCCCCCT
CTTGCCGGGAATTTAGCTCACGCAGGGGCCTCAGTTGATCTTACCATCTTCTCACTACATCTGGCCGGGGTATCCTCAAT
TCTAGGCGCAATTAACTTCATTACCACCATTATTAACATGAAACCACCAGCAATTTCACAATACCAAACACCTTTATTCG
TGTGAGCAGTCCTAGTTACAGCTGTCCTACTACTTCTATCCCTGCCCGTACTAGCTGCCGGAATTACCATACTACTAACA
GACCGAAACCTCAACACTACATTCTTTGACCCTGCAGGAGGAGGAGATCCAATT
>9033_5060|Astroblepus.sp|COI-5P
CTACTAATTCGAGCAGAATTAAGCCAACCCGGCTCCCTACTTGGCGACGATCAAATCTACAATGTAATCGTCACCGCACA
TGCTTTCGTAATAATCTTCTTCATAGTAATACCAATCATAATTGGCGGCTTTGGTAACTGACTAGTTCCACTTATAATCG
GAGCACCAGACATGGCATTCCCACGAATAAACAATATAAGCTTCTGACTGCTCCCTCCATCCTTTCTCTTGCTATTAGCT
TCCTCCGGAGTTGAAGCCGGGGCCGGAACAGGGTGAACAGTATACCCCCCGCTTGCTGGAAATTTAGCTCACGCAGGAGC
TTCAGTAGACCTCACCATCTTTTCTCTCCACCTGGCCGGTATCTCTTCAATTCTAGGAGCAATTAACTTCATTACCACCA
TCATTAACATAAAACCCCCTGCAATTTCACAATACCAAACACCCTTGTTCGTATGAGCAGTTTTAGTTACAGCTGTCCTA
CTACTTCTATCCCTCCCCGTGCT-CGCTGCGGGAATCACCATGCTACTAACAGACCGAAACCTAAATACTACATTCTTTG
ACCCTGCAGGAGGAGGGGAC
>5077_5077|Astroblepus.sp|COI-5P
GAGCAGGAATAGTTGGTACAGCCCTTAGTCTACTAATCCGGGCAGAATTAAGCCAACCTGGCTCTCTACTTGGCGACGAT
CAAATCTACAATGTTATCGTTACCGCACATGCTTTTGTAATAATTTTCTTTATAGTAATACCAATCATAATTGGCGGCTT
TGGCAACTGGCTGGTCCCCCTTATAATTGGAGCACCAGATATAGCATTTCCACGAATAAACAATATAAGTTTTTGACTAC
TGCCCCCATCATTCCTCTTACTACTTGCCTCCTCAGGAGTTGAAGCTGGGGCCGGAACAGGGTGAACTGTATATCCCCCT
CTTGCCGGGAATTTAGCTCACGCAGGAGCCTCAGTTGATCTTACCATCTTCTCACTACATCTGGCCGGGGTATCCTCAAT
TCTAGGCGCAATTAACTTCATTACCACCATTATTAACATGAAACCACCAGCAATTTCACAATACCAAACACCTTTATTCG
TGTGAGCAGTCCTAGTTACAGCTGTCCTACTACTTCTATCCCTACCCGTACTAGCTGCCGGAATTACCATACTACTAACA
GACCGAAACCTCAACACTACATTCTTTGACCCTGCAGGAGGAGGAGATCCAATT
>5118A_5118|Astroblepus.sp|COI-5P
GAGCAGGAATAGTTGGGACAGCTCTTAGTCTACTAATTCGAGCAGAATTAAGCCAACCCGGCTCCCTACTTGGCGACGAT
CAAATCTACAATGTAATCGTCACCGCACATGCTTTCGTAATAATCTTCTTCATAGTAATACCAATCATAATTGGCGGCTT
TGGTAACTGACTAGTTCCACTTATAATCGGAGCACCAGACATGGCATTCCCACGAATAAACAATATAAGCTTCTGACTGC
TCCCTCCATCCTTTCTCTTGCTATTAGCTTCCTCCGGAGTTGAAGCCGGGGCCGGAACAGGGTGAACAGTATACCCCCCG
CTTGCTGGAAATTTAGCTCACGCAGGAGCTTCAGTAGACCTCACCATCTTTTCTCTCCACCTGGCCGGTATCTCTTCAAT
TCTAGGAGCAATTAACTTCATTACCACCATCATTAACATAAAACCCCCTGCAATTTCACAATACCAAACACCCTTGTTCG
TATGAGCAGTTTTAGTTACAGCTGTCCTACTACTTCTATCCCTCCCCGTGCTCGCTGCGGGAATCACCATGCTACTAACA
GACCGAAACCTAAATACTACATTCTTTGACCCTGCAGGAGGAGGGGACCCAATT
>5118B_5118|Astroblepus.sp|COI-5P
GAGCAGGAATAGTTGGGACAGCTCTTAGTCTACTAATTCGAGCAGAATTAAGCCAACCCGGCTCCCTACTTGGCGACGAT
CAAATCTACAATGTAATCGTCACCGCACATGCTTTCGTAATAATCTTCTTCATAGTAATACCAATCATAATTGGCGGCTT
TGGTAACTGACTAGTTCCACTTATAATCGGAGCACCAGACATGGCATTCCCACGAATAAACAATATAAGCTTCTGACTGC
TCCCTCCATCCTTTCTCTTGCTATTAGCTTCCTCCGGAGTTGAAGCCGGGGCCGGAACAGGGTGAACAGTATACCCCCCG
CTTGCTGGAAATTTAGCTCACGCAGGAGCTTCAGTAGACCTCACCATCTTTTCTCTCCACCTGGCCGGTATCTCTTCAAT
TCTAGGAGCAATTAACTTCATTACCACCATCATTAACATAAAACCCCCTGCAATTTCACAATACCAAACACCCTTGTTCG
TATGAGCAGTTTTAGTTACAGCTGTCCTACTACTTCTATCCCTCCCCGTGCTCGCTGCGGGAATCACCATGCTACTAACA
GACCGAAACCTAAATACTACATTCTTTGACCCTGCA
>5118E_5118|Astroblepus.sp|COI-5P
GAGCAGGAATAGTTGGGACAGCTCTTAGTCTACTAATTCGAGCAGAATTAAGCCAACCCGGCTCCCTACTTGGCGACGAT
CAAATCTACAATGTAATCGTCACCGCACATGCTTTCGTAATAATCTTCTTCATAGTAATACCAATCATAATTGGCGGCTT
TGGTAACTGACTAGTTCCACTTATAATCGGAGCACCAGACATGGCATTCCCACGAATAAACAATATAAGCTTCTGACTGC
TCCCTCCATCCTTTCTCTTGCTATTAGCTTCCTCCGGAGTTGAAGCCGGGGCCGGAACAGGGTGAACAGTATACCCCCCG
CTTGCTGGAAATTTAGCTCACGCAGGAGCTTCAGTAGACCTCACCATCTTTTCTCTCCACCTGGCCGGTATCTCTTCAAT
TCTAGGAGCAATTAACTTCATTACCACCATCATTAACATAAAACCCCCTGCAATTTCACAATACCAAACACCCTTGTTCG
TATGAGCAGTTTTAGTTACAGCTGTCCTACTACTTCTATCCCTCCCCGTGCTCGCTGCGGGAATCACCATGCTACTAACA
GACCGAAACCTAAATACTACATTCTTTGACCCTGCAGGAGGAGGGGACCCAATT
>5132A_5132|Astroblepus.sp|COI-5P
GAGCAGGAATAGTTGGGACAGCTCTTAGTCTACTAATTCGAGCAGAATTAAGCCAACCCGGCTCCCTACTTGGCGACGAT
CAAATCTACAATGTAATCGTCACCGCACATGCTTTCGTAATAATCTTCTTCATAGTAATACCAATCATAATTGGCGGCTT
TGGTAACTGACTAGTTCCACTTATAATCGGAGCACCAGACATGGCATTCCCACGAATAAACAATATAAGCTTCTGACTGC
TCCCTCCATCCTTTCTCTTGCTATTAGCTTCCTCCGGAGTTGAAGCCGGGGCCGGAACAGGGTGAACAGTATACCCCCCG
CTTGCTGGAAATTTAGCTCACGCAGGAGCTTCAGTAGACCTCACCATCTTTTCTCTCCACCTGGCCGGTATCTCTTCAAT
TCTAGGAGCAATTAACTTCATTACCACCATCATTAACATAAAACCCCCTGCAATTTCACAATACCAAACACCCTTGTTCG
TATGAGCAGTTTTAGTTACAGCTGTCCTACTACTTCTATCCCTCCCCGTGCTCGCTGCGGGAATCACCATGCTACTAACA
GACCGAAACCTAAATACTACATTCTTTGACCCTGCAGGAGGAGGGGACCCAATT
>5132B_5132|Astroblepus.sp|COI-5P
GAGCAGGAATAGTTGGGACAGCTCTTAGTCTACTAATTCGAGCAGAATTAAGCCAACCCGGCTCCCTACTTGGCGACGAT
CAAATCTACAATGTAATCGTCACCGCACATGCTTTCGTAATAATCTTCTTCATAGTAATACCAATCATAATTGGCGGCTT
TGGTAACTGACTAGTTCCACTTATAATCGGAGCACCAGACATGGCATTCCCACGAATAAACAATATAAGCTTCTGACTGC
TCCCTCCATCCTTTCTCTTGCTATTAGCTTCCTCCGGAGTTGAAGCCGGGGCCGGAACAGGGTGAACAGTATACCCCCCG
CTTGCTGGAAATTTAGCTCACGCAGGAGCTTCAGTAGACCTCACCATCTTTTCTCTCCACCTGGCCGGTATCTCTTCAAT
TCTAGGAGCAATTAACTTCATTACCACCATCATTAACATAAAACCCCCTGCAATTTCACAATACCAAACACCCTTGTTCG
TATGAGCAGTTTTAGTTACAGCTGTCCTACTACTTCTATCCCTCCCCGTGCTCGCTGCGGGAATCACCATGCTACTAACA
GACCGAAACCTAAATACTACATTC
>5135A_5135|Astroblepus.sp|COI-5P
GAGCAGGAATAGTTGGGACAGCTCTTAGTCTACTAATTCGAGCAGAATTAAGCCAACCCGGCTCCCTACTTGGCGACGAT
CAAATCTACAATGTAATCGTCACCGCACATGCTTTCGTAATAATCTTCTTCATAGTAATACCAATCATAATTGGCGGCTT
TGGTAACTGACTAGTTCCACTTATAATCGGAGCACCAGACATGGCATTCCCACGAATAAACAATATAAGCTTCTGACTGC
TCCCTCCATCCTTTCTCTTGCTATTAGCTTCCTCCGGAGTTGAAGCCGGGGCCGGAACAGGGTGAACAGTATACCCCCCG
CTTGCTGGAAATTTAGCTCACGCAGGAGCTTCAGTAGACCTCACCATCTTTTCTCTCCACCTGGCCGGTATCTCTTCAAT
TCTAGGAGCAATTAACTTCATTACCACCATCATTAACATAAAACCCCCTGCAATTTCACAATACCAAACACCCTTGTTCG
TATGAGCAGTTTTAGTTACAGCTGTCCTACTACTTCTATCCCTCCCCGTGCTCGCTGCGGGAATCACCATGCTACTAACA
GACCGAAACCTAAATAC
>5135B_5135|Astroblepus.sp|COI-5P
GAGCAGGAATAGTTGGGACAGCTCTTAGTCTACTAATTCGAGCAGAATTAAGCCAACCCGGCTCCCTACTTGGCGACGAT
CAAATCTACAATGTAATCGTCACCGCACATGCTTTCGTAATAATCTTCTTCATAGTAATACCAATCATAATTGGCGGCTT
TGGTAACTGACTAGTTCCACTTATAATCGGAGCACCAGACATGGCATTCCCACGAATAAACAATATAAGCTTCTGACTGC
TCCCTCCATCCTTTCTCTTGCTATTAGCTTCCTCCGGAGTTGAAGCCGGGGCCGGAACAGGGTGAACAGTATACCCCCCG
CTTGCTGGAAATTTAGCTCACGCAGGAGCTTCAGTAGACCTCACCATCTTTTCTCTCCACCTGGCCGGTATCTCTTCAAT
TCTAGGAGCAATTAACTTCATTACCACCATCATTAACATAAAACCCCCTGCAATTTCACAATACCAAACACCCTTGTTCG
TATGAGCAGTTTTAGTTACAGCTGTCCTACTACTTCTATCCCTCCCCGTGCTCGCTGCGGGAATCACCATGCTACTAACA
GACCGAAACCTAAATACTACATTCTTTGACCCTGCAGGAGGAGGGGACCCAATT
>5135C_5135|Astroblepus.sp|COI-5P
CTCTTAATTCGAGCCGAACTAAGTCAACCTGGCACCCTCCTGGGTGACGACCAAATCTACAATGTGATCGTCACAGCTCA
TGCCTTTGTAATAATTTTTTTTATAGTCATACCAATCATAATTGGCGGCTTTGGTAACTGATTGATCCCACTAATAATCG
GCGCTCCCGACATAGCCTTCCCCCGAATAAATAACATAAGCTTTTGACTCCTTCCCCCCTCATTTCTTCTTCTTCTAGCA
TCCTCCGGGGTTGAAGCAGGAGCTGGAACTGGGTGAACTGTTTATCCCCCTCTTGCAGGTAATTTGGCACATGCTGGGCC
CTCCGTGGACTTGACTATTTTTTCACTCCACTTGGCTGGTATTTCCTCCATTTTAGGGGCAATCAACTTTATCACCACAA
TAATTAACATAAAACCCCCCGCAGCATCTCAATACCAGACACCCCTGTTTGTCTGAGCCGTTCTAATTACAGCCGTACTC
CTACTTCTTTCCCTCCCCGTCCT-TGCCGCAGGTATTACCATGCTTCTAACAGATCGAAATCTTAACACCACCTTCTTTG
ACCCCGCAGGTGGGGGAGAC
>9056_5068|Astroblepus.chapmani|COI-5P
CTATATTTAGTATTTGGCGCCTGAGCAGGAATAGTTGGAACAGCTCTTAGTCTACTAATTCGGGCAGAATTAAGCCAACC
CGGCTCCCTACTTGGCGACGATCAAATCTATAATGTTATCGTCACTGCCCACGCATTCGTAATAATCTTCTTCATGGTAA
TACCAATCATAATTGGTGGCTTTGGTAACTGATTAGTCCCGCTTATAATCGGAGCACCAGATATGGCATTTCCACGAATA
AATAATATGAGCTTCTGATTACTCCCTCCCTCCTTTCTCTTGTTACTAGCTTCCTCCGGAGTTGAAGCCGGGGCCGGAAC
AGGATGAACTGTATACCCGCCCCTTGCTGGAAATTTAGCCCACGCAGGAGCTTCAGTTGACCTCACCATCTTCTCCCTGC
ACCTAGCCGGGATTTCTTCAATTCTAGGCGCAATTAACTTCATTACCACCATCATCAACATAAAACCCCCAGCAATTTCA
CAATACCAGACACCCTTATTCGTATGGGCAGTTTTAGTTACAGCTGTCCTACTACTTCTATCCCTCCCCGTGCTCGCTGC
TGGAATTACTATACTTCTCACAGACCGAAACCTTAATACCACGTTCTTTGACCCTGCAGGAGGAGGAGACCCAATTCTCT
ACCAACACCTCTT
>9057_5068|Astroblepus.chapmani|COI-5P
CTATATTTAGTATTTGGCGCCTGAGCAGGAATAGTTGGAACAGCTCTTAGTCTACTAATTCGGGCAGAATTAAGCCAACC
CGGCTCCCTACTTGGCGACGATCAAATCTATAATGTTATCGTCACTGCCCACGCATTCGTAATAATCTTCTTCATGGTAA
TACCAATCATAATTGGTGGCTTTGGTAACTGATTAGTCCCGCTTATAATCGGAGCACCAGATATGGCATTTCCACGAATA
AATAATATGAGCTTCTGATTACTCCCTCCCTCCTTTCTCTTGTTACTAGCTTCCTCCGGAGTTGAAGCCGGGGCCGGAAC
AGGATGAACTGTATACCCGCCCCTTGCTGGAAATTTAGCCCACGCAGGAGCTTCAGTTGACCTCACCATCTTCTCCCTGC
ACCTAGCCGGGATTTCTTCAATTCTAGGCGCAATTAACTTCATTACCACCATCATCAACATAAAACCCCCAGCAATTTCA
CAATACCAGACACCCTTATTCGTATGGGCAGTTTTAGTTACAGCTGTCCTACTACTTCTATCCCTCCCCGTGCTCGCTGC
TGGAATTACTATACTTCTCACAGACCGAAACCTTAATACCACGTTCTTTGACCCTGCAGGAGGAGGAGACCCAATTCTCT
ACCAA
>7959_3456|Astroblepus.trifasciatus|COI-5P
NNNNNNNNNNNNNNNNNNNNNNNNNNNNNNNNNNNCCTCCTGGGTGACGACCAAATCTACAATGTGATCGTCACAGCTCA
TGCCTTTGTAATAATTTTTTTTATAGTCATACCAATCATAATTGGCGGCTTTGGTAACTGATTGATCCCACTAATAATCG
GCGCTCCCGACATAGCCTTCCCCCGAATAAATAACATAAGCTTTTGACTCCTTCCCCCCTCATTTCTTCTTCTTCTAGCA
TCCTCCGGGGTTGAAGCAGGAGCTGGAACTGGGTGAACTGTTTATCCCCCTCTTGCAGGTAATTTGGCACATGCTGGGCC
CTCCGTGGACTTGACTATTTTTTCACTCCACTTGGCTGGTATTTCCTCCATTTTAGGGGCAATCAACTTTATCACCACAA
TAATTAACATAAAACCCCCCGCAGCATCTCAATACCAGACACCCCTGTTTGTCTGAGCCGTTCTAATTACAGCCGTACTC
CTACTTCTTTCCCTCCCCGTCCT-TGCCGCAGGTATTACCATGCTTCTAACAGATCGAAATCTTAACACCACCTTCTTTG
ACCCCGCAGGTGGGGGANNN
>7525_2441|Astroblepus.trifasciatus|COI-5P
CTCTTAGTCTACTAATTCGAGCAGAATTAAGCCAACCCGGCTCCCTACTTGGCGACGATCAAATCTACAATGTAATCGTC
ACCGCACATGCTTTCGTAATAATCTTCTTCATAGTAATACCAATCATAATTGGCGGCTTTGGTAACTGACTAGTTCCACT
TATAATCGGAGCACCAGACATGGCATTCCCACGAATAAACAATATAAGCTTCTGACTGCTCCCTCCATCCTTTCTCTTGC
TATTAGCTTCCTCCGGAGTTGAAGCCGGGGCCGGAACAGGGTGAACAGTATACCCCCCGCTTGCTGGAAATTTAGCTCAC
GCAGGAGCTTCAGTAGACCTCACCATCTTTTCTCTCCACCTGGCCGGTATCTCTTCAATTCTAGGAGCAATTAACTTCAT
TACCACCATCATTAACATAAAACCCCCTGCAATTTCACAATACCAAACACCCTTGTTCGTATGAGCAGTTTTAGTTACAG
CTGTCCTACTACTTCTATCCCTCCCCGTGCTCGCTGCGGGAATCACCATGCTACTAACAGACCGAAACCTAAATACTACA
TTCTTTGACCCTGCAGGAGGAGGGGACCCAATTCTCTACCAACATCTTTTT
>7581_2553|Astroblepus.trifasciatus|COI-5P
NNNNNNNNNNNNNNNNNNNNNNNNNNNNNNNNNNNTCTCCTTGGAGACGACCAGATTTATAACGTAATCGTAACTGCACA
CGCCTTTGTAATAATTTTCTTTATAGTCATACCCATCATGATTGGGGGCTTCGGCAACTGATTGATCCCACTCATGATTG
GCGCCCCCGACATGGCCTTTCCACGAATAAACAACATGAGCTTTTGACTGCTCCCCCCCTCATTTCTCCTCCTCCTCGCC
TCCTCTGGAGTTGAAGCTGGTGCTGGAACAGGATGAACCGTTTACCCCCCACTAGCAGGCAATTTAGCACATGCTGGCCC
TTCAGTTGACCTAACCATCTTTTCCCTCCACTTAGCTGGGGTCTCATCTATTCTTGGAGCAATTAACTTCATCACCACAA
TTATTAACATAAAACCCCCAGCTATTTCCCAGTACCAAACACCCTTATTTATTTGAGCACTCTTAATTACCGCCGTCCTA
CTCCTACTGTCCCTTCCAGTCCT-TGCCGCCGGCATTACTATGCTTTTAACGGACCGAAACCTAAACACAACCTTTTTTG
ACCCGGCAGGAGGCGGAGNN
>7510_2421|Astroblepus.chapmani|COI-5P
NNNNNNNNNNNNNNNNNNNNNNNNNNNNCCGGCTCTCTCCTCGGAGACGACCAGATTTATAATGTAATTGTTACAGCACA
TGCTTTTGTAATAATTTTCTTTATAGTAATGCCAATTATGATTGGAGGCTTTGGAAACTGACTAGTACCACTCATGATTG
GTGCCCCAGATATGGCCTTCCCTCGAATGAACAACATGAGTTTCTGACTCCTCCCTCCCTCATTCCTCCTCCTCCTCGCC
TCATCTGGAGTCGAAGCAGGTGCCGGCACAGGGTGAACTGTTTACCCCCCGCTCGCAGGCAATCTTGCCCATGCTGGGCC
TTCTGTCGACTTAACCATCTTCTCTCTCCACTTGGCCGGGGTGTCATCTATTCTAGGCGCAATTAATTTCATTACAACAA
TCATTAACATGAAACCCCCCGCCATCTCTCAATATCAAACACCCCTATTTGTATGGTCCGTTCTAATTACCGCAGTATTA
CTTCTTCTATCCCTACCCGTTCT-TGCCGCCGGCATCACAATACTTCTCACAGACCGAAACCTAAACACAACCTTCTTTG
ATCCTGCCGGAGGAGGAGAC
>7960_3456|Astroblepus.trifasciatus|COI-5P
NNNNNNNNNNNNNNNNNNNNNNNCCAGCCAGGCTCACTCCTTGGAGACGACCAAATTTATAATGTCATTGTAACCGCACA
TGCCTTTGTAATAATTTTCTTTATAGTTATACCAATCATGATTGGAGGCTTTGGAAACTGACTTATCCCACTAATGCTTG
GAGCCCCAGACATGGCCTTCCCACGTATAAACAATATGAGCTTCTGACTACTGCCCCCCTCATTTCTTCTTCTATTAGCC
TCTTCAGGAGTTGAAGCAGGGGCTGGGACAGGATGAACTGTTTATCCCCCACTTGCCGGTAATTTAGCACACGCTGGGCC
TTCCGTAGATCTAACCATCTTTTCTCTTCATTTAGCCGGTGTGTCCTCAATTCTAGGTGCAATTAATTTTATTACCACAA
TTATTAATATAAAACCCCCAGCTATTTCTCTATATCAGATTCCTTTATTCGTATGAGCCCTTCTAATTACCGCTGTTCTT
CTTTTATTATCCCTTCCCGTGCT-TGCCGCTGGTATTACAATACTTTTAACTGACCGAAACCTAAATACCACCTTTTTTG
ACCCTGCAGGAGGAGGGGAC
>9036_5060|Astroblepus.sp|COI-5P
CTTCTAATTCGAGCAGAGCTTAGCCAGCCTGGGTCCCTTCTAGGTGACGATCAAATCTATAATGTAATCGTCACTGCGCA
TGCCTTTATTATAATCTTCTTTATGGTGATACCCATCATGATTGGGGGCTTCGGGAACTGATTAATTCCCTTAATAATCG
GGGCGCCTGATATAGCATTCCCTCGAATGAATAATATAAGCTTCTGACTTCTCCCACCTTCCTTCCTGCTCCTTCTGGCA
TCTTCGGGGGTAGAGGCGGGGGCCGGAACAGGGTGAACTGTTTATCCACCTCTTGCTGGAAATCTTGCTCACGCAGGCGC
ATCCGTTGACCTTACCATCTTCTCCCTCCATTTGGCAGGGGTCTCTTCAATTCTTGGTGCAATTAATTTTATTACCACTA
TTATTAATATAAAACCCCCAGCCATCTCACAATACCAGACCCCCCTGTTCGTCTGGGCAGTCTTAATTACAGCTGTACTT
CTACTTCTGTCTCTTCCTGTCCT-GGCCGCCGGAATTACTATATTGCTTACAGATCGAAACCTAAATACAACCTTCTTTG
ACCCGGCAGGGGGCGGAGAC
>5131B_5131|Astroblepus.chapmani|COI-5P
CTCCTTATCCGAGCAGAATTAAGTCAACCTGGCTCCCTACTAGGCGACGATCAAATTTATAATGTTATCGTAACTGCACA
TGCATTTGTGATAATCTTCTTTATAGTAATACCAGTAATAATCGGTGGCTTCGGAAACTGACTTGTTCCTCTGATGATCG
GTGCCCCCGATATGGCCTTTCCCCGNATGAANAACATAAGTTTCTGACTTTTACCCCCATCTTTCCTTCTCCTACTAGCC
TCATCNGGGGTTGAAGCCGGAGCAGGGACAGGTTGAACTGTTTATCCACCGCTCGCCGGAAACCTAGCACATGCAGGGGC
TTCCGTAGACCTAACTATTTTTTCACTCCACCTGGCCGGGGTATCTTCCATTTTAGGGGCGATCAACTTTATTACCACTA
TTATTAACATAAAACCACCAGCTATTTCACAATATCAAACKCCCCTATTTGTGTGAGCTGTTCTAATTACAGCTGTCCTT
CTTCTCCTATCACTCCCTGTGCT-AGCAGCCGGAATTACAATACTSCTAACAGACCGAAATCTTAANACCTCATTCTTTG
ATCCTGCAGGAGGGGGAGAC
>8197_3654|Pimelodus.grosskopffi|COI-5P
CCTCTACTTAGTATTTGGTGCCTGAGCCGGAATAGTTGGCACAGCCCTTAGCCTTCTAATTCGGGCAGAGCTGGCCCAAC
CCGGCGCCCTCCTAGGCGATGACCAAATTTATAACGTCATCGTAACTGCTCATGCCTTCGTAATAATTTTCTTCATAGTA
ATGCCAATCATGATCGGGGGATTCGGAAACTGATTAATCCCACTAATGATTGGAGCACCAGATATGGCATTCCCACGAAT
AAATAACATAAGCTTCTGACTTCTACCCCCATCGTTCCTCCTCCTCCTTGCCTCGTCAGGTGTAGAAGCTGGAGCAGGGA
CAGGATGAACTGTATACCCCCCTCTCGCCGGAAACCTTGCACACGCAGGCGCTTCTGTAGACCTAACCATTTTCTCCCTA
CACCTAGCAGGGGTTTCATCTATCTTAGGAGCTATTAACTTTATTACAACAATTATCAATATGAAACCCCCAGCCATCTC
ACAATACCAAACACCATTGTTTGTATGGTCAGTCTTAATTACAGCAGTACTACTTCTATTATCACTACCAGTACTGGCCG
CAGGCATTACAATGTTATTAACGGACCGAAACTTAAACACAACATTCTTTGACCCAGCAGGAGGAGGAGACCCAATCCTT
TACCAACATTTATTC
>8267_3769|Trachelyopterus.insignis|COI-5P
CCTGTATTTAATTTTCGGTGCCTGGGCAGGAATAGTTGGAACTGCCCTCAGCCTATTAATTCGAGCAGAATTGGCCCAGC
CTGGAGCTCTTCTAGGTGATGACCAAATTTATAATGTTATTGTTACTGCTCATGCCTTTGTAATAATTTTCTTTATAGTA
ATACCAATCATAATTGGAGGGTTTGGAAACTGACTTATTCCACTAATGATCGGGGCCCCCGACATGGCATTCCCCCGAAT
AAATAACATAAGTTTTTGACTTCTGCCACCTTCCTTCCTTCTGCTATTAGCCTCTTCGGGAGTTGAAGCAGGTGTAGGAA
CAGGATGGACCGTGTATCCCCCACTTGCTGGAAACCTCGCACACGCAGGGGCTTCTGTAGATCTAGCCATTTTCTCCCTC
CACTTAGCAGGTGTCTCATCAATTCTAGGAGCCATTAATTTCATCACAACAATTATTAATATAAAACCTCCAGCCATCTC
ACAATACCAAACACCATTATTTGTGTGAGCAATCCTGATTACGGCAGTACTGCTACTGCTATCCCTCCCAGTTCTTGCTG
CCGGCATCACTATGCTGCTAACAGACCGAAACTTAAATACAACATTCTTTGACCCAGCCGGGGGAGGAGACCCAATTCTA
TACCAACACCTCTTC
>6119B_6119|Trachelyopterus.insignis|COI-5P
CTCATGCCTTTGTAATAATTTTCTTTATAGTAATACCAATCATAATTGGAGGGTTTGGAAACTGACTTATTCCACTAATG
ATCGGGGCCCCCGACATGGCATTCCCCCGAATAAATAACATAAGTTTTTGACTTCTGCCACCTTCCTTCCTTCTGCTATT
AGCCTCTTCGGGAGTTGAAGCAGGTGTAGGAACAGGATGGACCGTGTATCCCCCACTTGCTGGAAACCTCGCACACGCAG
GGGCTTCTGTAGATCTAGCCATTTTCTCCCTCCACTTAGCAGGTGTCTCATCAATTCTAGGAGCCATTAATTTCATCACA
ACAATTATTAATATAAAACCTCCAGCCATCTCACAATACCAAACACCATTATTTGTGTGAGCAATCCTGATTACGGCAGT
ACTGCTACTGCTATCCCTCCCAGTTCTTGCTGCCGGCATCACTATGCTGCTAACAGACCGAAACTTAAATACAACATTCT
TTGACCCAGCCGGGGGAGGAGACCAATTCTATACCAACACCTCT
>6119D_6119|Trachelyopterus.insignis|COI-5P
AGCCTATTAGTTCCAGCAGAATTGGCCCAGCCTGGAGCTCTTCTAGGTGATGACCAAATTTATAATGTTATTGTTACTGC
TCATGCCTTTGTAATAATTTTCTTTATAGTAATACCAATCATAATTGGAGGGTTTGGAAACTGACTTATTCCACTAATGA
TCGGGGCCCCCGACATAGCATTCCCCCGAATAAATAACATAAGTTTTTGACTTCTGCCGCCTTCCTTCCTTCTGCTATTA
GCCTCTTCGGGAGTTGAAGCAGGTGTAGGAACAGGATGGACCGTGTATCCCCCACTTGCTGGAAACCTCGCACACGCAGG
GGCTTCTGTAGATCTAGCCATTTTCTCCCTCCACTTAGCAGGTGTCTCATCAATTCTAGGAGCCATTAATTTCATCACAA
CAATTATTAATATAAAACCTCCAGCCATCTCACAATACCAAACACCATTATTTGTGTGAGCAATCCTGATTACGGCAGTA
CTGCTACTGCTATCCCTCCCAGTTCTTGCTGCCGGCATCACTATGCTGCTAACAGACCGAAACTTAAATACAACATTCTT
TGACCCAGCCGGGGGAGGAGACCCAATTCTATACCAACACCTCTT
>5302_5302|Pimelodella.macrocephala|COI-5P
CTGCTAATTCGGGCGGAGCTAGCCCAGCCGGGGGCTCTCTTGGGTGATGACCAAATTTATAATGTTATCGTCACTGCCCA
TGCCTTCGTAATAATTTTCTTTATAGTAATGCCTATTATGATTGGGGGATTTGGAAACTGGCTTGTGCCACTAATAATCG
GTGCCCCAGACATGGCCTTCCCCCGAATAAACAACATAAGCTTCTGGCTCCTCCCCCCATCCTTCTTACTGCTGCTTGCC
TCCTCTGGTGTAGAAGCAGGTGTTGGAACAGGCTGAACTGTCTATCCCCCCCTTGCCGGAAATCTGGCACACGCCGGGGC
CTCCGTAGATCTTGCCATCTTCTCCCTTCACCTTGCAGGTGTGTCCTCTATTTTAGGAGCAATCAATTTTATTACAACGA
TTGTTAACATGAAGCCACCAGCCATCTCACAATATCAGACACCCTTGTTTGTGTGAGCTATTCTAATTACAGCTGTACTT
CTTCTTCTATCTCTGCCCGTCCT-GGCTGCTGGAATTACAATGCTCCTAACAGACCGAAACCTAAACACCACCTTCTTTG
ACCCCGCAGGTGGTGGGGAT
>5802_5802|Pimelodella.macrocephala|COI-5P
CTGCTAATTCGGGCGGAGCTAGCCCAGCCGGGGGCTCTCTTGGGTGATGACCAAATTTATAATGTTATCGTCACTGCCCA
TGCCTTCGTAATAATTTTCTTTATAGTAATGCCTATTATGATTGGGGGATTTGGAAACTGGCTTGTGCCACTAATAATCG
GTGCCCCAGACATGGCCTTCCCCCGAATAAACAACATAAGCTTCTGGCTCCTCCCCCCATCCTTCTTACTGCTGCTTGCC
TCCTCTGGTGTAGAAGCAGGTGTTGGAACAGGCTGAACTGTCTATCCCCCCCTTGCCGGAAATCTGGCACACGCCGGGGC
CTCCGTAGATCTTGCCATCTTCTCCCTTCACCTTGCAGGTGTGTCCTCTATTTTAGGAGCAATCAATTTTATTACAACGA
TTGTTAACATGAAGCCACCAGCCATCTCACAATATCAGACACCCTTGTTTGTGTGAGCTATTCTAATTACAGCTGTACTT
CTTCTTCTATCTCTGCCCGTCCT-GGCTGCTGGAATTACAATGCTCCTAACAGACCGAAACCTAAACACCACCTTCTTTG
ACCCCGCAGGTGGTGGGGAT
>5628C_5628|Rhamdia.guatemalensis|COI-5P
GCTCTCCTGGGCGACGACCAGATTTACAATGTTATTGTTACTGCTCATGCCTTCGTAATAATTTTCTTTATAGTAATACC
CATTATGATCGGAGGGTTTGGAAACTGACTTGTACCATTAATGATTGGTGCCCCAGACATAGCCTTCCCCCGAATGAATA
ACATAAGCTTTTGACTCCTTCCCCCATCATTTCTTCTTCTGCTTGCCTCATCTGGCGTAGAAGCAGGGGTTGGAACAGGC
TGAACTGTCTATCCGCCCCTTGCCGGAAATCTGGCACACGCTGGAGCTTCCGTTGACCTTGCTATCTTCTCCCTTCACCT
TGCAGGTGTGTCCTCCATTCTAGGGGCAATTAATTTTATTACAACCATTATTAACATGAAACCGCCAGCCATTTCGCAAT
ACCAAACACCGCTGTTTGTATGAGCTATTCTAATTACCGCAGTACTTCTTCTGCTCTCCCTCCCAGTTCTAGCCGCCGGA
ATTACAATACTTCTGACGGACCGAAACTTAAATACCACCTTCTTTGACCCAGCAGGCGGAGGTGATCCTATTCTCTATCA
ACATCTATT
>5628B_5628|Rhamdia.guatemalensis|COI-5P
CTCTAAGCCTACTAATTCGGGCAGAGCTAGCCCAACCTGGAGCTCTCCTGGGCGACGACCAGATTTACAATGTTATTGTT
ACTGCTCATGCCTTCGTAATAATTTTCTTTATAGTAATACCCATTATGATCGGAGGGTTTGGAAACTGACTTGTACCATT
AATGATTGGTGCCCCAGACATAGCCTTCCCCCGAATGAATAACATAAGCTTTTGACTCCTTCCCCCATCATTTCTTCTTC
TGCTTGCCTCATCTGGCGTAGAAGCAGGGGTTGGAACAGGCTGAACTGTCTATCCGCCCCTTGCCGGAAATCTGGCACAC
GCTGGAGCTTCCGTTGACCTTGCTATCTTCTCCCTTCACCTTGCAGGTGTGTCCTCCATTCTAGGGGCAATTAATTTTAT
TACAACCATTATTAACATGAAACCGCCAGCCATTTCGCAATACCAAACACCGCTGTTTGTATGAGCTATTCTAATTACCG
CAGTACTTCTTCTGCTCTCCCTCCCAGTTCTAGCCGCCGGAATTACAATACTTCTGACGGACCGAAACTTAAATACCACC
TTCTTTGACCCAGCAGGCGGAGGTGATCCTATTCTCTATCAACATCTATT
>5628A_5628|Rhamdia.guatemalensis|COI-5P
AGCCCAACCGGGGAGCTCTCCTGGGCGACGACCAGATTTACAATGTTATTGTTACTGCTCATGCCTTCGTAATAATTTTC
TTTATAGTAATACCCATTATGATCGGAGGGTTTGGAAACTGACTTGTACCATTAATGATTGGTGCCCCAGACATAGCCTT
CCCCCGAATGAATAACATAAGCTTTTGACTCCTTCCCCCATCATTTCTTCTTCTGCTTGCCTCATCTGGCGTAGAAGCAG
GGGTTGGAACAGGCTGAACTGTCTATCCGCCCCTTGCCGGAAATCTGGCACACGCTGGAGCTTCCGTTGACCTTGCTATC
TTCTCCCTTCACCTTGCAGGTGTGTCCTCCATTCTAGGGGCAATTAATTTTATTACAACCATTATTAACATGAAACCGCC
AGCCATTTCGCAATACCAAACACCGCTGTTTGTATGAGCTATTCTAATTACCGCAGTACTTCTTCTGCTCTCCCTCCCAG
TTCTAGCCGCCGGAATTACAATACTTCTGACGGACCGAAACTTAAATACCACCTTCTTTGACCCAGCAGGCGGAGGTGAT
CCTATTCTCTATCAACATCTATT
>5658_5658|Pimelodus.grosskopfii|COI-5P
CTGGCCCAACCCGGCGCCCTCCTGGGTGATGACCAAATCTATAACGTCATCGTCACTGCTCATGCCTTCGTAATAATTTT
CTTCATAGTAATACCAATCATGATCGGGGGATTTGGAAACTGATTAGTCCCACTAATAATTGGAGCACCCGATATGGCAT
TCCCACGAATAAATAACATAAGCTTCTGACTACTACCACCATCATTCCTCCTCCTACTTGCTTCATCAGGGGTAGAAGCT
GGAGCAGGAACAGGATGAACTGTATACCCCCCTCTCGCCGGAAACCTTGCACATGCAGGCGCTTCTGTGGATCTAACTAT
TTTTTCCCTCCACCTAGCAGGAGTTTCATCCATTTTAGGAGCTATTAACTTCATTACAACAATTATTAATATGAAACCCC
CAGCCATCTCACAATACCAAACACCATTATTTGTATGGTCAGTCCTAATCACAGCAGTTCTACTTCTATTATCACTACCA
GTACTGGCCGCAGGCATTACAATGTTGTTAACGGACCGAAACTTAAACACAACATTCTTTGACCCAGCAGGAGGAGGAGA
CCCAATTCTTTACCAACATTTATTC
>5660_5660|Rhamdia.guatemalensis|COI-5P
CTANTAATTCGGGCAGAGCTAGCCCAACCTGGAGCTCTCCTGGGCGACGACCAGATTTACAATGTTATTGTTACTGCTCA
TGCCTTCGTAATAATTTTCTTTATAGTAATACCCATTATGATCGGAGGGTTTGGAAACTGACTTGTACCATTAATGATTG
GTGCCCCAGACATAGCCTTCCCCCGAATGAATAACATAAGCTTTTGACTCCTTCCCCCATCATTTCTTCTTCTGCTTGCC
TCATCTGGCGTAGAAGCAGGGGTTGGAACAGGCTGAACTGTCTATCCGCCCCTTGCCGGAAATCTGGCACACGCTGGAGC
TTCCGTTGACCTTGCTATCTTCTCCCTTCACCTTGCAGGTGTGTCCTCCATTCTAGGGGCAATTAATTTTATTACAACCA
TTATTAACATGAAACCGCCAGCCATTTCGCAATACCAAACACCGCTGTTTGTATGAGCTATTCTAATTACCGCAGTACTT
CTTCTGCTCTCCCTCCCAGTTCT-AGCCGCCGGAATTACAATACTTCTGACGGACCGAAACTTAAATACCACCTTCTTTG
ACCCAGCAGGCGGAGGTGAT
>5319A_5319|Rhamdia.guatemalensis|COI-5P
CTACTAATTCGGGCAGAGCTAGCCCAACCTGGAGCTCTCCTGGGCGACGACCAGATTTACAATGTTATTGTTACTGCTCA
TGCCTTCGTAATAATTTTCTTTATAGTAATACCCATTATGATCGGAGGGTTTGGAAACTGACTTGTACCATTAATGATTG
GTGCCCCAGACATAGCCTTCCCCCGAATGAATAACATAAGCTTTTGACTCCTTCCCCCATCATTTCTTCTTCTGCTTGCC
TCATCTGGCGTAGAAGCAGGGGTTGGAACAGGCTGAACTGTCTATCCGCCCCTTGCCGGAAATCTGGCACACGCTGGAGC
TTCCGTTGACCTTGCTATCTTCTCCCTTCACCTTGCAGGTGTGTCCTCCATTCTAGGGGCAATTAATTTTATTACAACCA
TTATTAACATGAAACCGCCAGCCATTTCGCAATACCAAACACCGCTGTTTGTATGAGCTATTCTAATTACCGCAGTACTT
CTTCTGCTCTCCCTCCCAGTTCT-AGCCGCCGGAATTACAATACTTCTGACGGACCGAAACTTAAATACCACCTTCTTTG
ACCCAGCAGGCGGAGGTGAT
>6473_6473|Pimelodella.chagresi|COI-5P
NNNNNNNNNNNNNNNNNNNNNNNNNNNNNNNNNNNNNNNNNNNNNNNNNNNNNNNNNNNNNNNNNNNNNNNNNNNNCTCA
TGCCTTCGTAATAATTTTCTTTATAGTAATACCCATTATGATCGGAGGGTTTGGAAACTGACTTGTGCCCCTAATAATCG
GCGCACCAGATATGGCGTTCCCCCGAATAAATAACATAAGCTTTTGATTACTTCCCCCATCATTCTTACTATTACTTGCC
TCCTCTGGAGTCGAAGCAGGAGTTGGAACCGGCTGAACTGTCTACCCACCCCTTGCTGGGAATCTAGCACACGCTGGAGC
TTCTGTAGATCTTGCTATTTTCTCTCTTCACCTTGCAGGTGTATCTTCTATTCTGGGGGCAATCAATTTTATTACAACCA
TTATTAATATGAAACCACCAGCTATCTCACAATACCAAACACCGCTGTTTGTATGGGCCATCCTAATTACAGCAGTACTT
CTTCTTCTATCCTTACCAGTCCT-AGCCGCTGGAATTACAATATTACTAACAGACCGAAACCTAAATACTACATTCTTTG
ACCCAGCAGGAGGGGGAGAT
>9048_5064|Pimelodella.chagresi|COI-5P
CTGCTAATTCGGGCAGAGCTAGCCCAACCCGGGGCTCTTCTGGGCGACGACCAGATTTATAATGTTATCGTTACTGCTCA
TGCCTTCGTAATAATTTTCTTTATAGTAATACCCATTATGATCGGAGGGTTTGGAAACTGACTTGTGCCCCTAATAATCG
GCGCACCAGATATGGCGTTCCCCCGAATAAATAACATAAGCTTTTGATTACTTCCCCCATCATTCTTACTATTACTTGCC
TCCTCTGGAGTCGAAGCAGGAGTTGGAACCGGCTGAACTGTCTACCCACCCCTTGCTGGGAATCTAGCACACGCTGGAGC
TTCTGTAGATCTTGCTATTTTCTCTCTTCACCTTGCAGGTGTATCTTCTATTCTGGGGGCAATCAATTTTATTACAACCA
TTATTAATATGAAACCACCAGCTATCTCACAATACCAAACACCGCTGTTTGTATGGGCCATCCTAATTACAGCAGTACTT
CTTCTTCTATCCTTACCAGTCCT-AGCCGCTGGAATTACAATACTACTAACAGACCGAAACCTAAATACTACATTCTTTG
ACCCAGCAGGAGGGGGAGAT
>5616B_5616|Cetopsorhamdia.nasus|COI-5P
CTCATGCCTTTGTAATAATTTTCTTTATAGTAATACCAATCATGATTGGAGGCTTTGGAAACTGACTTATTCCCTTAATA
ATTGGAGCCCCCGATATGGCATTCCCTCGGATAAATAACATAAGCTTCTGGCTCCTCCCTCCCTCATTTTTACTCCTCTT
AGCCTCGTCTGGTGTAGAGGCCGGAGTGGGCACAGGGTGAACTGTTTATCCCCCTCTTGCCGGAAACCTGGCACACGCCG
GAGCCTCTGTAGACCTAGCCATTTTCTCACTACACCTTGCAGGTGTCTCCTCTATTCTAGGGGCTATTAACTTTATTACA
ACAATTATTAATATAAAACCACCCGCCATTTCTCAGTACCAAACACCATTATTTGTTTGAGCCACTTTAATTACGGCAGT
ACTCCTCCTTCTTTCCCTTCCAGTCCTGGCCGCCGGGATTACAATACTGCTCACCGACCGAAATTTAAACACCACCTTCT
TTGACCCAGCAGGAGGAGGAGACCCCATCCTATACCAACACTTA
>5433A_5433|Cetopsorhamdia.boquillae|COI-5P
TTACTAATTCGAGCAGAGCTAGCCCAACCCGGCGCCCTCCTGGGGGACGACCAGATTTATAATGTTATTGTTACCGCTCA
TGCCTTTGTAATAATTTTCTTTATAGTAATACCAATTATGATTGGAGGCTTTGGAAACTGACTTATCCCCCTAATAATTG
GAGCCCCCGATATAGCATTCCCTCGGATAAATAATATAAGCTTCTGGCTCCTCCCTCCCTCATTCCTACTCCTCCTAGCC
TCGTCTGGGGTAGAAGCTGGGGTCGGCACAGGATGAACTGTCTACCCCCCTCTTGCCGGAAACCTGGCACACGCCGGGGC
CTCTGTAGACCTGGCCATTTTCTCTCTGCACCTTGCAGGGGTTTCCTCTATTCTGGGGGCCATTAACTTTATTACAACGA
TTATCAACATGAAACCGCCCGCTATCTCTCAGTACCAAACACCGCTATTTGTTTGAGCCACTCTAATTACGGCAGTACTC
CTCCTTCTTTCCCTCCCAGTCCT-AGCTGCCGGAATTACAATACTACTTACCGATCGAAATTTAAACACCACCTTCTTTG
ACCCAGCAGGAGGGGGAGAC
>5433C_5433|Cetopsorhamdia.boquillae|COI-5P
TTACTAATTCGAGCAGAGCTAGCCCAACCCGGCGCCCTCCTGGGGGACGACCAGATTTATAATGTTATTGTTACCGCTCA
TGCCTTTGTAATAATTTTCTTTATAGTAATACCAATTATGATTGGAGGCTTTGGAAACTGACTTATCCCCCTAATAATTG
GAGCCCCCGATATAGCATTCCCTCGGATAAATAATATAAGCTTCTGGCTCCTCCCTCCCTCATTCCTACTCCTCCTAGCC
TCGTCTGGGGTAGAAGCTGGGGTCGGCACAGGATGAACTGTCTACCCCCCTCTTGCCGGAAACCTGGCACACGCCGGGGC
CTCTGTAGACCTGGCCATTTTCTCTCTGCACCTTGCAGGGGTTTCCTCTATTCTGGGGGCCATTAACTTTATTACAACGA
TTATCAACATGAAACCGCCCGCTATCTCTCAGTACCAAACACCGCTATTTGTTTGAGCCACTCTAATTACGGCAGTACTC
CTCCTTCTTTCCCTCCCAGTCCT-AGCTGCCGGAATTACAATACTACTTACCGATCGAAATTTAAACACCACCTTCTTTG
ACCCAGCAGGAGGGGGAGAC
>8501_3922|Cetopsorhamdia.boquillae|COI-5P
TTACTAATTCGAGCAGAGCTAGCCCAACCCGGCGCCCTCCTGGGGGACGACCAGATTTATAATGTTATTGTTACCGCTCA
TGCCTTTGTAATAATTTTCTTTATAGTAATACCAATTATGATTGGAGGCTTTGGAAACTGACTCATCCCCCTAATAATTG
GAGCCCCCGATATAGCATTCCCTCGGATAAATAATATAAGCTTCTGGCTCCTCCCTCCCTCATTCCTACTCCTCCTAGCC
TCGTCTGGGGTAGAAGCTGGGGTCGGCACAGGATGAACTGTCTACCCCCCTCTTGCCGGAAACCTGGCACACGCCGGGGC
CTCTGTAGACCTGGCCATTTTCTCTCTGCACCTTGCAGGGGTTTCCTCTATTCTGGGGGCCATTAACTTTATTACAACGA
TTATCAACATGAAACCGCCCGCTATCTCTCAGTACCAAACACCGCTATTTGTTTGAGCCACTCTAATTACGGCAGTACTC
CTCCTTCTTTCCCTCCCAGTCCT-AGCTGCCGGAATTACAATACTACTTACCGATCGAAATTTAAACACCACCTTCTTTG
ACCCAGCAGGAGGGGGAGAC
>5633A_5633|Cetopsorhamdia.nasus|COI-5P
NNNNNNNNNNNNNNNNNNNNNNNNNNNNNNNNNNNNNNNNNNNNNNNNNNNNNNNNNNNNNNNNNNNNNNNNNNNNCTCA
TGCCTTTGTAATAATTTTCTTTATAGTAATACCAATCATGATTGGAGGCTTTGGAAACTGACTTATTCCCTTAATAATTG
GAGCCCCCGATATGGCATTCCCTCGGATAAATAACATAAGCTTCTGGCTCCTCCCTCCCTCATTTTTACTCCTCTTAGCC
TCGTCTGGTGTAGAGGCCGGAGTGGGCACAGGGTGAACTGTTTATCCCCCTCTTGCCGGAAACCTGGCACACGCCGGAGC
CTCTGTAGACCTAGCCATTTTCTCACTACACCTTGCAGGTGTCTCCTCTATTCTAGGGGCTATTAACTTTATTACAACAA
TTATTAATATAAAACCACCCGCCATTTCTCAGTACCAAACACCATTATTTGTTTGAGCCACTTTAATTACGGCAGTACTC
CTCCTTCTTTCCCTTCCAGTCCTGGCCGCCGGGATTACAATACTGCTCACCGACCGAAATTTAAACACCACCTTCTTTGA
CCCAGCAGGAGGAGGAGACCCCATCCTATACCAACACTTA
>5633B_5633|Cetopsorhamdia.nasus|COI-5P
NNNNNNNNNNNNNNNNNNNNNNNNNNNNNNNNNNNNNNNNNNNNNNNNNNNNNNNNNNNNNNNNNNNNNNNNNNNNCTCA
TGCCTTTGTAATAATTTTCTTTATAGTAATACCAATCATGATTGGAGGCTTTGGAAACTGACTTATTCCCTTAATAATTG
GAGCCCCCGATATGGCATTCCCTCGGATAAATAACATAAGCTTCTGGCTCCTCCCTCCCTCATTTTTACTCCTCTTAGCC
TCGTCTGGTGTAGAGGCCGGAGTGGGCACAGGGTGAACTGTTTATCCCCCTCTTGCCGGAAACCTGGCACACGCCGGAGC
CTCTGTAGACCTAGCCATTTTCTCACTACACCTTGCAGGTGTCTCCTCTATTCTAGGGGCTATTAACTTTATTACAACAA
TTATTAATATAAAACCACCCGCCATTTCTCAGTACCAAACACCATTATTTGTTTGAGCCACTTTAATTACGGCAGTACTC
CTCCTTCTTTCCCTTCCAGTCCT-GGCCGCCGGGATTACAATACTGCTCACCGACCGAAATTTAAACACCACCTTCTTTG
ACCCAGCAGGAGGAGGAGAC
>8068_3613|Chaetostoma.leucomelas|COI-5P
TTTTTTTTTTTTACACCCCCCCCAAGACATTGGGACCCTTTACTTAGTATTTGGTGCCTGGGCCGGAATGGTTGGCACAG
CTCTCAGTCTTTTAATTCGGGCTGAGCTGAGCCAACCCGGCTCTCTATTAGGCGATGACCAAATTTATAACGTCATCGTT
ACCGCACATGCCTTCGTAATAATTTTCTTTATGGTAATGCCAATTATAATTGGGGGCTTTGGAAACTGGCTAGTGCCACT
AATAATTGGGGCCCCAGATATGGCCTTCCCACGAATGAACAACATAAGCTTCTGATTGCTCCCCCCATCATTCCTTCTCT
TGTTGGCCTCCTCAGGAGTTGAAGCAGGGGCAGGAACAGGTTGAACTGTATACCCCCCACTCGCCGGAAACTTGGCCCAC
GCAGGGGCCTCGGTTGATCTGACCATTTTTTCACTTCACCTGGCCGGTGTTTCCTCAATTCTTGGAGCAATCAATTTTAT
TACCACAATTATTAACATAAAACCCCCAGCTATCTCACAATACCAAACTCCTTTATTTGTATGGGCTGTGCTTATTACCG
CCGTCCTACTCCTGCTTTCACTACCCGTTCTAGCTGCTGGCATTACAATACTGCTAACAGACCGAAACTTAAACACTACC
TTCTTTGACCCTGCAGGGGGCGGAGACCCGATCCTCTATCAAC
>7439_1940|Chaetostoma.leucomelas|COI-5P
CTTTACTTAGTATTTGGTGCCTGAGCCGGAATGGTTGGCACAGCTCTCAGTCTTTTAATTCGGGCTGAGCTGAGCCAACC
CGGCTCTCTATTAGGCGATGACCAAATTTATAACGTCATCGTTACCGCACATGCCTTCGTAATAATTTTCTTTATGGTAA
TGCCAATTATAATTGGGGGCTTTGGAAACTGGCTAGTGCCACTAATAATTGGGGCCCCAGATATGGCCTTCCCCCGAATG
AACAACATAAGCTTCTGATTGCTCCCTCCATCATTCCTTCTCTTGTTGGCCTCCTCAGGAGTTGAAGCAGGGGCAGGAAC
AGGTTGAACTGTATACCCCCCACTCGCCGGAAACTTGGCCCACGCAGGGGCCTCGGTTGATCTGACCATTTTTTCACTTC
ACCTGGCCGGTGTTTCCTCAATTCTTGGAGCAATCAATTTTATTACCACGATTATTAACATAAAACCCCCAGCTATCTCA
CAATACCAAACTCCTTTATTTGTGTGGGCTGTGCTTATTACCGCCGTCCTACTCCTGCTTTCACTACCCGTTCTAGCTGC
TGGCATTACAATACTACTAACAGACCGAAACTTAAACACTACCTTCTTTGACCCTGCAGGGGGCGGAGACCCGATCCTCT
ATCAACACCTATT
>7440_1940|Chaetostoma.leucomelas|COI-5P
CCTTTACTTAGTATTTGGTGCCTGGGCCGGAATGGTTGGCACAGCTCTCAGTCTTTTAATTCGGGCTGAGCTGAGCCAAC
CCGGCTCTCTATTAGGCGATGACCAAATTTATAACGTCATCGTTACCGCACATGCCTTCGTAATAATTTTCTTTATGGTA
ATGCCAATTATAATTGGGGGCTTTGGAAACTGGCTAGTGCCACTAATAATTGGGGCCCCAGATATGGCCTTCCCACGAAT
GAACAACATAAGCTTCTGATTGCTCCCCCCATCATTCCTTCTCTTGTTGGCCTCCTCAGGAGTTGAAGCAGGGGCAGGAA
CAGGTTGAACTGTATACCCCCCACTCGCCGGAAACTTGGCCCACGCAGGGGCCTCGGTTGATCTGACCATTTTTTCACTT
CACCTGGCCGGTGTTTCCTCAATTCTTGGAGCAATCAATTTTATTACCACAATTATTAACATAAAACCCCCAGCTATCTC
ACAATACCAAACTCCTTTATTTGTGTGGGCTGTGCTTATTACCGCCGTCCTACTCCTGCTTTCACTACCCGTTCTAGCTG
CTGGCATTACAATACTGCTAACAGACCGAAACTTAAACACTACCTTCTTTGACCCTGCAGGGGGCGGAGACCCGATCCTC
TATCAACAC
>7482_2278|Chaetostoma.leucomelas|COI-5P
TTTACTTAGTATTTGGTGCCTGAGCCGGAATGGTTGGCACAGCTCTCAGTCTCTTAATTCGGGCTGAGCTGAGCCAACCC
GGCTCTCTATTAGGCGATGATCAAATTTATAACGTCATCGTTACCGCACATGCCTTCGTAATAATTTTCTTTATGGTAAT
ACCAATTATAATCGGAGGCTTTGGAAACTGGCTAGTACCACTAATAATTGGGGCCCCCGACATGGCCTTCCCCCGAATGA
ACAACATAAGCTTCTGACTGCTCCCCCCATCATTCCTTCTTTTGTTAGCCTCCTCAGGAGTTGAAGCAGGGGCAGGAACA
GGTTGAACTGTATACCCCCCACTCGCCGGAAACTTGGCTCACGCAGGGGCCTCAGTCGATCTGACCATTTTTTCACTTCA
CCTGGCTGGTGTCTCCTCAATTCTTGGAGCAATCAATTTTATTACCACGATTATTAACATAAAACCCCCAGCTATCTCAC
AATACCAAACTCCTTTATTTATCTGGGCTGTGCTTATTACCGCCGTCCTACTCCTGCTTTCACTACCCGTTCTAGCTGCT
GGCATTACAATACTACTAACAGACCGAAACTTAAACACTACCTTCTTTGACCCTGCAGGGGGTGGAGACCCGATCCTCTA
TCAGCACCTATTC
>7441_1940|Chaetostoma.leucomelas|COI-5P
TTACTTAGTATTTGGTGCCTGGGCCGGAATGGTTGGCACAGCTCTCAGTCTTTTAATTCGGGCTGAGCTGAGCCAACCCG
GCTCTCTATTAGGCGATGACCAAATTTATAACGTCATCGTTACCGCACATGCCTTCGTAATAATTTTCTTTATGGTAATG
CCAATTATAATTGGGGGCTTTGGAAACTGGCTAGTGCCACTAATAATTGGGGCCCCAGATATGGCCTTCCCACGAATGAA
CAACATAAGCTTCTGATTGCTCCCCCCATCATTCCTTCTCTTGTTGGCCTCCTCAGGAGTTGAAGCAGGGGCAGGAACAG
GTTGAACTGTATACCCCCCACTCGCCGGAAACTTGGCCCACGCAGGGGCCTCGGTTGATCTGACCATTTTTTCACTTCAC
CTGGCCGGTGTTTCCTCAATTCTTGGAGCAATCAATTTTATTACCACAATTATTAACATAAAACCCCCAGCTATCTCACA
ATACCAAACTCCTTTATTTGTGTGGGCTGTGCTTATTACCGCCGTCCTACTCCTGCTTTCACTACCCGTTCTAGCTGCTG
GCATTACAATACTGCTAACAGACCGAAACTTAAACACTACCTTCTTTGACCCTGCAGGGGGCGGAGACCCGATCCTCTAT
CA
>7491_2287|Chaetostoma.leucomelas|COI-5P
CTTTACTTAGTATTTGGTGCCTGAGCCGGAATGGTTGGCACAGCTCTCAGTCTCTTAATTCGGGCTGAGCTGAGCCAACC
CGGCTCTCTATTAGGCGATGATCAAATTTATAACGTCATCGTTACCGCACATGCCTTCGTAATAATTTTCTTTATGGTAA
TACCAATTATAATCGGAGGCTTTGGAAACTGGCTAGTACCACTAATAATTGGGGCCCCCGACATGGCCTTCCCCCGAATG
AACAACATAAGCTTCTGACTGCTCCCCCCATCATTCCTTCTTTTGTTAGCCTCCTCAGGAGTTGAAGCAGGGGCAGGAAC
AGGTTGAACTGTATACCCCCCACTCGCCGGAAACTTGGCTCACGCAGGGGCCTCAGTCGATCTGACCATTTTTTCACTTC
ACCTGGCTGGTGTCTCCTCAATTCTTGGAGCAATCAATTTTATTACCACGATTATTAACATAAAACCCCCAGCTATCTCA
CAATACCAAACTCCTTTATTTATCTGGGCTGTGCTTATTACCGCCGTCCTACTCCTGCTTTCACTACCCGTTCTAGCTGC
TGGCATTACAATACTACTAACAGACCGAAACTTAAACACTACCTTCTTTGACCCTGCAGGGGGTGGAGACCCGATCCTCT
ATCAGCACCTATT
>7562_2541|Chaetostoma.leucomelas|COI-5P
GCTCTCAGTCTTTTAATTCGGGCTGAGCTGAGCCAACCCGGCTCTCTATTAGGCGATGACCAAATTTATAACGTCATCGT
TACCGCACATGCCTTCGTAATAATTTTCTTTATGGTAATGCCAATTATAATTGGGGGCTTTGGAAACTGGCTAGTGCCAC
TAATAATTGGGGCCCCAGATATGGCCTTCCCACGAATGAACAACATAAGCTTCTGATTGCTCCCCCCATCATTCCTTCTC
TTGTTGGCCTCCTCAGGAGTTGAAGCAGGGGCAGGAACAGGTTGAACTGTATACCCCCCACTCGCCGGAAACTTGGCCCA
CGCAGGGGCCTCGGTTGATCTGACCATTTTTTCACTTCACCTGGCCGGTGTTTCCTCAATTCTTGGAGCAATCAATTTTA
TTACCACAATTATTAACATAAAACCCCCAGCTATCTCACAATACCAAACTCCTTTATTTGTGTGGGCTGTGCTTATTACC
GCCGTCCTACTCCTGCTTTCACTACCCGTTCTAGCTGCTGGCATTACAATACTGCTAACAGACCGAAACTTAAACACTAC
CTTCTTTGACCCTGCAGGGGGCGGAGACCCGATCCTCTATCAACACCTATT
>7566_2543|Chaetostoma.leucomelas|COI-5P
CCTTTACTTAGTATTTGGTGCCTGGGCCGGAATGGTTGGCACAGCTCTCAGTCTTTTAATTCGGGCTGAGCTGAGCCAAC
CCGGCTCTCTATTAGGCGATGACCAAATTTATAACGTCATCGTTACCGCACATGCCTTCGTAATAATTTTCTTTATGGTA
ATGCCAATTATAATTGGGGGCTTTGGAAACTGGCTAGTGCCACTAATAATTGGGGCCCCAGATATGGCCTTCCCACGAAT
GAACAACATAAGCTTCTGATTGCTCCCCCCATCATTCCTTCTCTTGTTGGCCTCCTCAGGAGTTGAAGCAGGGGCAGGAA
CAGGTTGAACTGTATACCCCCCACTCGCCGGAAACTTGGCCCACGCAGGGGCCTCGGTTGATCTGACCATTTTTTCACTT
CACCTGGCCGGTGTTTCCTCAATTCTTGGAGCAATCAATTTTATTACCACAATTATTAACATAAAACCCCCAGCTATCTC
ACAATACCAAACTCCTTTATTTGTGTGGGCTGTGCTTATTACCGCCGTCCTACTCCTGCTTTCACTACCCGTTCTAGCTG
CTGGCATTACAATACTGCTAACAGACCGAAACTTAAACACTACCTTCTTTGACCCTGCAGGGGGCGGAGACCCGATCCTC
TATCAACA
>7567_2544|Chaetostoma.leucomelas|COI-5P
CTTTACTTAGTATTTGGTGCCTGGGCCGGAATGGTTGGCACAGCTCTCAGTCTTTTAATTCGGGCTGAGCTGAGCCAACC
CGGCTCTCTATTAGGCGATGACCAAATTTATAACGTCATCGTTACCGCACATGCCTTCGTAATAATTTTCTTTATGGTAA
TGCCAATTATAATTGGGGGCTTTGGAAACTGGCTAGTGCCACTAATAATTGGGGCCCCAGATATGGCCTTCCCACGAATG
AACAACATAAGCTTCTGATTGCTCCCCCCATCATTCCTTCTCTTGTTGGCCTCCTCAGGAGTTGAAGCAGGGGCAGGAAC
AGGTTGAACTGTATACCCCCCACTCGCCGGAAACTTGGCCCACGCAGGGGCCTCGGTTGATCTGACCATTTTTTCACTTC
ACCTGGCCGGTGTTTCCTCAATTCTTGGAGCAATCAATTTTATTACCACAATTATTAACATAAAACCCCCAGCTATCTCA
CAATACCAAACTCCTTTATTTGTGTGGGCTGTGCTTATTACCGCCGTCCTACTCCTGCTTTCACTACCCGTTCTAGCTGC
TGGCATTACAATACTGCTAACAGACCGAAACTTAAACACTACCTTCTTTGACCCTGCAGGGGGCGGAGACCCGATCCTCT
ATCAACACCTATT
>7570_2546|Chaetostoma.leucomelas|COI-5P
CCTTTACTTAGTATTTGGTGCCTGGGCCGGAATGGTTGGCACAGCTCTCAGTCTTTTAATTCGGGCTGAGCTGAGCCAAC
CCGGCTCTCTATTAGGCGATGACCAAATTTATAACGTCATCGTTACCGCACATGCCTTCGTAATAATTTTCTTTATGGTA
ATGCCAATTATAATTGGGGGCTTTGGAAACTGGCTAGTGCCACTAATAATTGGGGCCCCAGATATGGCCTTCCCACGAAT
GAACAACATAAGCTTCTGATTGCTCCCCCCATCATTCCTTCTCTTGTTGGCCTCCTCAGGAGTTGAAGCAGGGGCAGGAA
CAGGTTGAACTGTATACCCCCCACTCGCCGGAAACTTGGCCCACGCAGGGGCCTCGGTTGATCTGACCATTTTTTCACTT
CACCTGGCCGGTGTTTCCTCAATTCTTGGAGCAATCAATTTTATTACCACAATTATTAACATAAAACCCCCAGCTATCTC
ACAATACCAAACTCCTTTATTTGTGTGGGCTGTGCTTATTACCGCCGTCCTACTCCTGCTTTCACTACCCGTTCTAGCTG
CTGGCATTACAATACTGCTAACAGACCGAAACTTAAACACTACCTTCTTTGACCCTGCAGGGGGCGGAGACCCGATCCTC
TATCAACACCTATT
>5632_5632|Pseudopimelodus|COI-5P
NNNNNNNNNNNNNNNNNNNNNNNNNNNNNNNNNNNNNNNNNNNNNNNNNNNNNNNNNNNNNNNNNNNNNNNNNNNNCTCA
CGCTTTCGTAATAATTTTCTTTATAGTAATACCCATTATGATTGGGGGCTTTGGTAACTGGCTTATCCCACTAATAATCG
GCGCACCAGATATGGCATTCCCACGAATAAACAATATAAGTTTCTGATTACTTCCACCCTCCTTTCTACTTCTACTTGCC
TCATCTGGAGTAGAAGCGGGAGTAGGAACAGGATGAACTGTTTACCCACCCCTCGCCGGAAACCTAGCACATGCTGGAGC
TTCTGTAGATTTAGCTATTTTCTCTCTCCACCTCGCCGGAGTATCCTCTATTCTGGGGGCCATTAACTTTATTACAACTA
TTATTAATATAAAACCCCCAGCTATCTCGCAATATCAAACACCCTTATTTGTGTGGGCCACCCTAATTACAGCAGTATTA
TTACTACTATCACTCCCTGTCCT-AGCTGCTGGTATTACAATACTACTGACAGATCGAAATTTAAATACTACATTCTTCG
ACCCTGCAGGAGGAGGAGAC
>8268_3769|Trachelyopterus.insignis|COI-5P
CTTCTAATTCGAGCAGAGCTAGCCCAACCCGGCGCCCTTTTAGGCGACGATCAAATTTATAATGTCATCGTCACTGCTCA
CGCTTTCGTAATAATCTTCTTTATAGTAATACCCATTATGATTGGGGGCTTTGGGAACTGACTTATCCCACTAATAATTG
GTGCACCAGACATGGCATTCCCACGAATAAACAATATGAGTTTCTGATTACTCCCGCCCTCCTTTCTACTACTGCTTTCC
TCATCTGGGGTAGAAGCTGGGGTAGGAACAGGATGAACTGTTTATCCCCCCCTCGCCGGAAACCTAGCACATGCAGGAGC
TTCCGTAGATCTAGCTATTTTTTCCCTCCACCTTGCCGGGGTGTCATCCATTCTGGGAGCCATTAACTTTATTACAACTA
TTATTAACATAAAACCCCCAGCCATCTCACAATATCAAACGCCCCTATTTGTATGAGCCACCCTAATTACAGCAGTACTA
TTATTACTATCACTCCCTGTCCT-AGCTGCTGGTATTACAATATTACTAACGGACCGAAATTTAAATACTACATTCTTCG
ACCCCGCAGGAGGAGGAGAC
>8269_3769|Trachelyopterus.insignis|COI-5P
GCCCTTAGCCTTCTAATTCGAGCAGAGCTAGCCCCACTTGGCGCCCTTTTAGGCGACGATCAAATTTATAATGTCATCGTCACTGCTCACGCTTTCGTAATAATCTTCTTTATAGTAATACCCATTATGATTGGGGGCTTTGGGAACTGACTTATCCCACTAATAATTGGTGCACCAGACATGGCATTCCCACGAATAAACAATATGAGTTTCTGATTACTCCCGCCCTCCTTTCTACTACTGCTTTCCTCATCTGGGGTAGAAGCTGGGGTAGGAACAGGATGAACTGTTTATCCCCCCCTCGCCGGAAACCTAGCACATGCAGGAGCTTCCGTAGATCTAGCTATTTTTTCCCTCCACCTTGCCGGGGTGTCATCCATTCTGGGAGCCATTAACTTTATTACAACTATTATTAACATAAAACCCCCAGCCATCTCACAATATCAAACGCCCCTATTTGTATGAGCCACCCTAATTACAGCAGTACTATTATTACTATCACTCCCTGTCCTAGCTGCTGGTATTACAATATTACTAACGGACCGAAATTTAAATACTACATTCTTCGACCCCGCAGGAGGAGGAGACCCAATTCTTTACCAACACCTATTCTGATTCTTTGGTCAC
>6147C_6147|Ageneiosus.pardalis|COI-5P
NNNNNNNNNNNNNNNNNNNNNNNNNNNNNNNNNNNNNNNNNNNNNNNNNNNNNNNNNNNNNNNNNNNNNNNNNNNNCTCA
TGCCTTCGTTATAATTTTCTTTATAGTAATACCGATCATGATTGGGGGCTTTGGAAACTGACTTATCCCACTAATGATTG
GAGCGCCTGACATAGCATTTCCTCGAATAAACAATATAAGTTTCTGACTCCTACCCCCTTCCTTCCTACTATTACTGGCC
TCCTCCGGAGTAGAGGCCGGAGTTGGGACGGGGTGAACCGTGTATCCCCCTCTTGCCGGAAACCTTGCTCATGCAGGAGC
CTCTGTAGATTTAGCCATCTTCTCCCTGCATCTAGCAGGAGTATCATCTATTTTGGGGGCCATCAATTTTATTACAACAA
TCATCAACATGAAACCTCCAGCCATCTCGCAGTACCAAACGCCCTTGTTTGTGTGAGCAATTCTAATTACAGCAGTATTA
TTATTACTCTCCCTCCCAGTTCT-TGCTGCCGGAATTACAATATTACTAACAGACCGAAATCTAAACACAACATTCTTTG
ACCCCGCCGGAGGTGGGGAC
>8270_3770|Ageneiosus.pardalis|COI-5P
CTATTAATTCGAGCAGAATTAGCCCAACCAGGGGCCCTCTTGGGCGATGACCAAATTTATAATGTCATTGTTACTGCTCA
TGCCTTCGTTATAATTTTCTTTATAGTAATACCGATCATGATTGGGGGCTTTGGAAACTGACTTATCCCACTAATGATTG
GAGCGCCTGACATAGCATTTCCTCGAATAAACAATATAAGTTTCTGACTCCTACCCCCTTCCTTCCTACTATTACTGGCC
TCCTCCGGAGTAGAGGCCGGAGTTGGGACGGGGTGAACCGTGTATCCCCCTCTTGCCGGAAACCTTGCTCATGCAGGAGC
CTCTGTAGATTTAGCCATCTTCTCCCTGCATCTAGCAGGAGTATCATCTATTTTGGGGGCCATCAATTTTATTACAACAA
TCATCAACATGAAACCTCCAGCCATCTCGCAGTACCAAACGCCCTTGTTTGTGTGAGCAATTCTAATTACAGCAGTATTA
TTATTACTCTCCCTCCCAGTTCT-TGCTGCCGGAATTACAATATTACTAACAGACCGAAATCTAAACACAACATTCTTTG
ACCCCGCCGGAGGTGGGGAC
>6138_6138|Trachelyopterus.insignis|COI-5P
NNNNNNNNNNNNNNNNNNNNNNNNNNNNNNNNNNNNNNNNNNNNNNNNNNNNNNNNNNNNNNNNNNNNNNNNNNNNCTCA
TGCCTTTGTAATAATTTTCTTTATAGTAATACCAATCATAATTGGAGGGTTTGGAAACTGACTTATTCCACTAATGATCG
GGGCCCCCGACATGGCATTCCCCCGAATAAATAACATAAGTTTTTGACTTCTGCCACCTTCCTTCCTTCTGCTATTAGCC
TCTTCGGGAGTTGAAGCAGGTGTAGGAACAGGATGGACCGTGTATCCCCCACTTGCTGGAAACCTCGCACACGCAGGGGC
TTCTGTAGATCTAGCCATTTTCTCCCTCCACTTAGCAGGTGTCTCATCAATTCTAGGAGCCATTAATTTCATCACAACAA
TTATTAATATAAAACCTCCAGCCATCTCACAATACCAAACACCATTATTTGTGTGAGCAATCCTGATTACGGCAGTACTG
CTACTGCTATCCCTCCCAGTTCT-TGCTGCCGGCATCACTATGCTGCTAACAGACCGAAACTTAAATACAACATTCTTTG
ACCCAGCCGGGGGAGGAGAC
>8287_3667|Trachelyopterus.insignis|COI-5P
CTATTAATTCGAGCAGAATTGGCCCCGTCTGGAGCTCTTCTAGGTGATGACCAAATTTATAATGTTATTGTTACTGCTCA
TGCCTTTGTAATAATTTTCTTTATAGTAATACCAATCATAATTGGAGGGTTTGGAAACTGACTTATTCCACTAATGATCG
GGGCCCCCGACATAGCATTCCCCCGAATAAATAACATAAGTTTTTGACTTCTGCCGCCTTCCTTCCTTCTGCTATTAGCC
TCTTCGGGAGTTGAAGCAGGTGTAGGAACAGGATGGACCGTGTATCCCCCACTTGCTGGAAACCTCGCACACGCAGGGGC
TTCTGTAGATCTAGCCATTTTCTCCCTCCACTTAGCAGGTGTCTCATCAATTCTAGGAGCCATTAATTTCATCACAACAA
TTATTAATATAAAACCTCCAGCCATCTCACAATACCAAACACCATTATTTGTGTGAGCAATCCTGATTACGGCAGTACTG
CTACTGCTATCCCTCCCAGTTCT-TGCTGCCGGCATCACTATGCTGCTAACAGACCGAAACTTAAATACAACATTCTTTG
ACCCAGCCGGGGGAGGAGAC
>8286_3667|Trachelyopterus.insignis|COI-5P
CTGCCCTCAGCCTATTAATTCGAGCAGAATTGGCCCAGCCTGGAGCTCTTCTAGGTGATGACCAAATTTATAATGTTATTGTTACTGCTCATGCCTTTGTAATAATTTTCTTTATAGTAATACCAATCATAATTGGAGGGTTTGGAAACTGACTTATTCCACTAATGATCGGGGCCCCCGACATGGCATTCCCCCGAATAAATAACATAAGTTTTTGACTTCTGCCACCTTCCTTCCTTCTGCTATTAGCCTCTTCGGGAGTTGAAGCAGGTGTAGGAACAGGATGGACCGTGTATCCCCCACTTGCTGGAAACCTCGCACACGCAGGGGCTTCTGTAGATCTAGCCATTTTCTCCCTCCACTTAGCAGGTGTCTCATCAATTCTAGGAGCCATTAATTTCATCACAACAATTATTAATATAAAACCTCCAGCCATCTCACAATACCAAACACCATTATTTGTGTGAGCAATCCTGATTACGGCAGTACTGCTACTGCTATCCCTCCCAGTTCTTGCTGCCGGCATCACTATGCTGCTAACAGACCGAAACTTAAATACAACATTCTTTGACCCAGCCGGGGGAGGAGACCCAATTCTATACCAACACCTCTTCTGATTCTTTGGCCC
>8266_3667|Trachelyopterus.insignis|COI-5P
CTATTAATTCGAGCAGAATTGGCCCAGCCTGGAGCTCTTCTAGGTGATGACCAAATTTATAATGTTATTGTTACTGCTCA
TGCCTTTGTAATAATTTTCTTTATAGTAATACCAATCATAATTGGAGGGTTTGGAAACTGACTTATTCCACTAATGATCG
GGGCCCCCGACATGGCATTCCCCCGAATAAATAACATAAGTTTTTGACTTCTGCCACCTTCCTTCCTTCTGCTATTAGCC
TCTTCGGGAGTTGAAGCAGGTGTAGGAACAGGATGGACCGTGTATCCCCCACTTGCTGGAAACCTCGCACACGCAGGGGC
TTCTGTAGATCTAGCCATTTTCTCCCTCCACTTAGCAGGTGTCTCATCAATTCTAGGAGCCATTAATTTCATCACAACAA
TTATTAATATAAAACCTCCAGCCATCTCACAATACCAAACACCATTATTTGTGTGAGCAATCCTGATTACGGCAGTACTG
CTACTGCTATCCCTCCCAGTTCT-TGCTGCCGGCATCACTATGCTGCTAACAGACCGAAACTTAAATACAACATTCTTTG
ACCCAGCCGGGGGAGGAGAC
>6535C_6535|Trachelyopterus.insignis|COI-5P
CTATTAATTCGAGCAGAATTGGCCCAGCCTGGAGCTCTTCTAGGTGATGACCAANTTTATAATGTTATTGTTACTGCTCA
TGCCTTTGTAATAATTTTCTTTATAGTAATACCAATCATAATTGGAGGGTTTGGAAACTGACTTATTCCACTAATGATCG
GGGCCCCCGNCATGGCATTCCCCCGAATAAATAACATAAGTTTTTGACTTCTGCCACCTTCCTTCCTTCTGCTATTAGCC
TCTTCGGGAGTTGAAGCAGGTGTAGGAACAGGATGGACCGTGTATCCCCCACTTGCTGGAAACCTCGCACACGCAGGGGC
TTCTGTAGATCTAGCMATTTTCTCCCTCCACTTAGCAGGTGTCTCATCAATTCTAGGAGCCATTAATTTCATCACAACAA
TTATTAATATAAAACCTCCAGCCATCTCACAATACCAAACACCATTATTTGTGTGAGCAATCCTGATTACGGCAGTACTG
CTACTGCTATCCCTCCCAGTTCT-TGCTGCCGGCATCACTATGCTGCTAACRGACCGAAACTTAAATACAACATTCTTTG
ACCCAGCCGGGGGAGGAGAC
>6511_6511|Pseudoplatystoma.magdaleniatum|COI-5P
NNNNNNNNNNNNNNNNNNNNNNNNNNNNNNNNNNNNNNNNNNNNNNNNNNNNNNNNNNNNNNNNNNNNNNNNNNNNCTCA
TGCCTTTGTAATAATTTTCTTTATAGTAATACCCATTATGATCGGGGGATTTGGAAACTGGTTAGTCCCACTAATGATTG
GGGCACCAGATATGGCATTCCCACGAATAAATAACATAAGCTTCTGACTACTCCCCCCATCCTTCTTACTCCTACTTGCC
TCATCTGGAGTAGAGGCAGGAGCAGGTACAGGCTGAACCGTGTACCCCCCTCTTGCAGGGAATCTGGCACACGCCGGAGC
TTCTGTAGATTTAACTATTTTCTCCCTGCATCTGGCTGGGGTATCATCCATTCTAGGGGCCATTAACTTTATTACAACCA
TCATTAACATGAAACCCCCGTCTATTTCACAATATCAAACACCACTATTTGTATGGTCAGTCCTAATTACAGCCGTACTT
CTTCTACTATCTCTCCCCGTCCT-AGCCGCAGGTATTACAATGTTACTAACAGACCGAAACTTAAATACTACATTCTTTG
ACCCAGCAGGGGGAGGAGAC
>7456_2023|Pseudoplatystoma.magdaleniatum|COI-5P
CTGTTAATTCGGGCAGAGCTGGCCCAACCCGGCGCCCTCCTAGGCGATGACCAAATTTACAATGTCATTGTAACTGCTCA
TGCCTTTGTAATAATTTTCTTTATAGTAATACCCATTATGATCGGGGGATTTGGAAACTGGTTAGTCCCACTAATGATTG
GGGCACCAGATATGGCATTCCCACGAATAAATAACATAAGCTTCTGACTACTCCCCCCATCCTTCTTACTCCTACTTGCC
TCATCTGGAGTAGAGGCAGGAGCAGGTACAGGCTGAACCGTGTACCCCCCTCTTGCAGGGAATCTGGCACACGCCGGAGC
TTCTGTAGATTTAACTATTTTCTCCCTGCATCTGGCTGGGGTATCATCCATTCTAGGGGCCATTAACTTTATTACAACCA
TCATTAACATGAAACCCCCGTCTATTTCACAATATCAAACACCACTATTTGTATGGTCAGTCCTAATTACAGCCGTACTT
CTTCTACTATCTCTCCCCGTCCT-AGCCGCAGGTATTACAATGTTACTAACAGACCGAAACTTAAATACTACATTCTTTG
ACCCAGCAGGGGGAGGAGAC
>8213_3666|Sorubim.cuspicaudus|COI-5P
CTACTAATTCGGGCAGAGCTGGCCCAACCCGGTGCTCTCCTAGGCGACGACCAAATTTACAATGTCATTGTAACTGCTCA
TGCCTTCGTAATAATTTTCTTTATAGTAATACCAATCATAATTGGAGGATTCGGAAACTGATTAGTCCCACTAATAATTG
GGGCACCAGACATGGCATTCCCACGAATAAATAACATAAGTTTCTGACTACTGCCCCCATCCTTCCTACTTCTGCTCGCC
TCCTCTGGAGTAGAAGCAGGGGCAGGAACAGGATGAACTGTGTACCCCCCTCTTGCCGGAAACCTAGCACATGCAGGAGC
TTCCGTGGACTTAACTATTTTTTCCCTTCATTTAGCAGGGGTGTCATCAATCCTTGGGGCCATTAACTTTATTACAACCA
TTATTAATATAAAACCCCCATCTATCTCACAATATCAGACACCATTATTTGTATGGTCCGTTCTAATTACAGCAGTACTT
CTTCTACTATCTCTCCCAGTCTT-AGCCGCAGGCATTACAATGTTATTAACAGACCGAAACTTGAATACTACATTCTTTG
ACCCGGCAGGAGGGGGAGAT
>8261_3660|Sorubim.cuspicaudus|COI-5P
CCAAATTTACAATGTCATTGTAACTGCTCATGCCTTCGTAATAATTTTCTTTATAGTAATACCAATCATAATTGGAGGATTCGGAAACTGATTAGTCCCACTAATAATTGGGGCACCAGACATGGCATTCCCACGAATAAATAACATAAGTTTCTGACTACTGCCCCCATCCTTCCTACTTCTGCTCGCCTCCTCTGGAGTAGAAGCAGGGGCAGGAACAGGATGAACTGTGTACCCCCCTCTTGCCGGAAACCTAGCACATGCAGGAGCTTCCGTGGACTTAACTATTTTTTCCCTTCATTTAGCAGGGGTGTCATCAATCCTTGGGGCCATTAACTTTATTACAACCATTATTAATATAAAACCCCCATCTATCTCACAATATCAGACACCATTATTTGTATGGTCCGTTCTAATTACAGCAGTACTTCTTCTACTATCTCTCCCAGTCTTAGCCGCAGGCATTACAATGTTATTAACAGACCGAAACTTGAATACTACATTCTTTGACCCGGCAGGAGGGGGAGATCCAATTCTTTATCAACACTTATTCTGATTCTTTGG
>8262_3660|Sorubim.cuspicaudus|COI-5P
AGGCGACGACCAAATTTACAATGTCATTGTAACTGCTCATGCCTTCGTAATAATTTTCTTTATAGTAATACCAATCATAATTGGAGGATTCGGAAACTGATTAGTCCCACTAATAATTGGGGCACCAGACATGGCATTCCCACGAATAAATAACATAAGTTTCTGACTACTGCCCCCATCCTTCCTACTTCTGCTCGCCTCCTCTGGAGTAGAAGCAGGGGCAGGAACAGGATGAACTGTGTACCCCCCTCTTGCCGGAAACCTAGCACATGCAGGAGCTTCCGTGGACTTAACTATTTTTTCCCTTCATTTAGCAGGGGTGTCATCAATCCTTGGGGCCATTAACTTTATTACAACCATTATTAATATAAAACCCCCATCTATCTCACAATATCAGACACCATTATTTGTATGGTCCGTTCTAATTACAGCAGTACTTCTTCTACTATCTCTCCCAGTCTTAGCCGCAGGCATTACAATGTTATTAACAGACCGAAACTTGAATACTACATTCTTTGACCCGGCAGGAGGGGGAGATCCAATTCTTTATCAACACTTATTCTGATTCTTTGGCCA
>8260_3660|Sorubim.cuspicaudus|COI-5P
CTACTAATTCGGGCAGAGCTGGCCCAACCCGGTGCTCTCCTAGGCGACGACCAAATTTACAATGTCATTGTAACTGCTCA
TGCCTTCGTAATAATTTTCTTTATAGTAATACCAATCATAATTGGAGGATTCGGAAACTGATTAGTCCCACTAATAATTG
GGGCACCAGACATGGCATTCCCACGAATAAATAACATAAGTTTCTGACTACTGCCCCCATCCTTCCTACTTCTGCTCGCC
TCCTCTGGAGTAGAAGCAGGGGCAGGAACAGGATGAACTGTGTACCCCCCTCTTGCCGGAAACCTAGCACATGCAGGAGC
TTCCGTGGACTTAACTATTTTTTCCCTTCATTTAGCAGGGGTGTCATCAATCCTTGGGGCCATTAACTTTATTACAACCA
TTATTAATATAAAACCCCCATCTATCTCACAATATCAGACACCATTATTTGTATGGTCCGTTCTAATTACAGCAGTACTT
CTTCTACTATCTCTCCCAGTCTT-AGCCGCAGGCATTACAATGTTATTAACAGACCGAAACTTGAATACTACATTCTTTG
ACCCGGCAGGAGGGGGAGAT
>8257_3660|Sorubim.cuspicaudus|COI-5P
CCTAGGCGACGACCAAATTTACAATGTCATTGTAACTGCTCATGCCTTCGTAATAATTTTCTTTATAGTAATACCAATCATAATTGGAGGATTCGGAAACTGATTAGTCCCACTAATAATTGGGGCACCAGACATGGCATTCCCACGAATAAATAACATAAGTTTCTGACTACTGCCCCCATCCTTCCTACTTCTGCTCGCCTCCTCTGGAGTAGAAGCAGGGGCAGGAACAGGATGAACTGTGTACCCCCCTCTTGCCGGAAACCTAGCACATGCAGGAGCTTCCGTGGACTTAACTATTTTTTCCCTTCATTTAGCAGGGGTGTCATCAATCCTTGGGGCCATTAACTTTATTACAACCATTATTAATATAAAACCCCCATCTATCTCACAATATCAGACACCATTATTTGTATGGTCCGTTCTAATTACAGCAGTACTTCTTCTACTATCTCTCCCAGTCTTAGCCGCAGGCATTACAATGTTATTAACAGACCGAAACTTGAATACTACATTCTTTGACCCGGCAGGAGGGGGAGATCCAATTCTTTATCAACACTTATTCTGATTCTTTGG
>8258_3660|Sorubim.cuspicaudus|COI-5P
CTCTACCTAGTATTCGGTGCCTGAGCCGGAATAGTCGGCACAGCCCTTAGCCTACTAATTCGGGCAGAGCTGGCCCAACC
CGGTGCTCTCCTAGGCGACGACCAAATTTACAATGTCATTGTAACTGCTCATGCCTTCGTAATAATTTTCTTTATAGTAA
TACCAATCATAATTGGAGGATTCGGAAACTGATTAGTCCCACTAATAATTGGGGCACCAGACATGGCATTCCCACGAATA
AATAACATAAGTTTCTGACTACTGCCCCCATCCTTCCTACTTCTGCTCGCCTCCTCTGGAGTAGAAGCAGGGGCAGGAAC
AGGATGAACTGTGTACCCCCCTCTTGCCGGAAACCTAGCACATGCAGGAGCTTCCGTGGACTTAACTATTTTTTCCCTTC
ATTTAGCAGGGGTGTCATCAATCCTTGGGGCCATTAACTTTATTACAACCATTATTAATATAAAACCCCCATCTATCTCA
CAATATCAGACACCATTATTTGTATGGTCCGTTCTAATTACAGCAGTACTTCTTCTACTATCTCTCCCAGTCTTAGCCGC
AGGCATTACAATGTTATTAACAGACCGAAACTTGAATACTACATTCTTTGACCCGGCAGGAGGGGGAGATCCAATTCTTT
ATCAACACTTATTC
>8259_3660|Sorubim.cuspicaudus|COI-5P
CTACTAATTCGGGCAGAGCTGGCCCAACCCGGTGCTCTCCTAGGCGACGACCAAATTTACAATGTCATTGTAACTGCTCA
TGCCTTCGTAATAATTTTCTTTATAGTAATACCAATCATAATTGGAGGATTCGGAAACTGATTAGTCCCACTAATAATTG
GGGCACCAGACATGGCATTCCCACGAATAAATAACATAAGTTTCTGACTACTGCCCCCATCCTTCCTACTTCTGCTCGCC
TCCTCTGGAGTAGAAGCAGGGGCAGGAACAGGATGAACTGTGTACCCCCCTCTTGCCGGAAACCTAGCACATGCAGGAGC
TTCCGTGGACTTAACTATTTTTTCCCTTCATTTAGCAGGGGTGTCATCAATCCTTGGGGCCATTAACTTTATTACAACCA
TTATTAATATAAAACCCCCATCTATCTCACAATATCAGACACCATTATTTGTATGGTCCGTTCTAATTACAGCAGTACTT
CTTCTACTATCTCTCCCAGTCTT-AGCCGCAGGCATTACAATGTTATTAACAGACCGAAACTTGAATACTACATTCTTTG
ACCCGGCAGGAGGGGGAGAT
>8242_3663|Pimelodus.grosskopfii|COI-5P
NNNNNNNNNNNNNNNNNNNNNNNNNNNNNNNNNNNCCTCCTAGGCGATGACCAAATTTATAACGTCATCGTAACTGCTCA
TGCCTTCGTAATAATTTTCTTCATAGTAATGCCAATCATGATCGGGGGATTCGGAAACTGATTAATCCCACTAATGATTG
GAGCACCAGATATGGCATTCCCACGAATAAATAACATAAGCTTCTGACTTCTACCCCCATCGTTCCTCCTCCTCCTTGCC
TCGTCAGGTGTAGAAGCTGGAGCAGGGACAGGATGAACTGTATACCCCCCTCTCGCCGGAAACCTTGCACACGCAGGCGC
TTCTGTAGACCTAACCATTTTCTCCCTACACCTAGCAGGGGTTTCATCTATCTTAGGAGCTATTAACTTTATTACAACAA
TTATCAATATGAAACCCCCAGCCATCTCACAATACCAAACACCATTGTTTGTATGGTCAGTCTTAATTACAGCAGTGCTA
CTTCTATTATCACTACCAGTACT-GGCCGCAGGCATTACAATGTTATTAACGGACCGAAACTTAAACACAACATTCTTTG
ACCCAGCAGGAGGAGGAGAC
>8243_3663|Pimelodus.grosskopfii|COI-5P
CCTCCTAGGCGATGACCAAATTTATAACGTCATCGTAACTGCTCATGCCTTCGTAATAATTTTCTTCATAGTAATGCCAATCATGATCGGGGGATTCGGAAACTGATTAATCCCACTAATGATTGGAGCACCAGATATGGCATTCCCACGAATAAATAACATAAGCTTCTGACTTCTACCCCCATCGTTCCTCCTCCTCCTTGCCTCGTCAGGTGTAGAAGCTGGAGCAGGGACAGGATGAACTGTATACCCCCCTCTCGCCGGAAACCTTGCACACGCAGGCGCTTCTGTAGACCTAACCATTTTCTCCCTACACCTAGCAGGGGTTTCATCTATCTTAGGAGCTATTAACTTTATTACAACAATTATCAATATGAAACCCCCAGCCATCTCACAATACCAAACACCATTGTTTGTATGGTCAGTCTTAATTACAGCAGTACTACTTCTATTATCACTACCAGTACTGGCCGCAGGCATTACAATGTTATTAACGGACCGAAACTTAAACACAACATTCTTTGACCCAGCAGGAGGAGGAGACCCAATCCTTTACCAAC
>8247_3663|Pimelodus.grosskopfii|COI-5P
NNNNNNNTTCGGGCAGAGCTGGCCCAACCCGGCGCCCTCCTAGGCGATGACCAAATTTATAACGTCATCGTAACTGCTCA
TGCCTTCGTAATAATTTTCTTCATAGTAATGCCAATCATGATCGGGGGATTCGGAAACTGATTAATCCCACTAATGATTG
GAGCACCAGATATGGCATTCCCACGAATAAATAACATAAGCTTCTGACTTCTACCCCCATCGTTCCTCCTCCTCCTTGCC
TCGTCAGGTGTAGAAGCTGGAGCAGGGACAGGATGAACTGTATACCCCCCTCTCGCCGGAAACCTTGCACACGCAGGCGC
TTCTGTAGACCTAACCGTTTTCTCCCTACACCTAGCAGGGGTTTCATCTATCTTAGGAGCTATTAACTTTATTACAACAA
TTATCAATATGAAACCCCCAGCCATCTCACAATACCAAACACCATTGTTTGTATGGTCAGTCTTAATTACAGCAGTACTA
CTTCTATTATCACTACCAGTACT-GGCCGCAGGCATTACGATGTTATTAACGGACCGAAACTTAAACACAACATTCTTTG
ACCCAGCAGGAGGAGGAGAC
>8248_3663|Pimelodus.grosskopfii|COI-5P
TCATCGTAACTGCTCATGCCTTCGTAATAATTTTCTTCATAGTAATGCCAATCATGATCGGGGGATTCGGAAACTGATTAATCCCACTAATGATTGGAGCACCAGATATGGCATTCCCACGAATAAATAACATAAGCTTCTGACTTCTACCCCCATCGTTCCTCCTCCTCCTTGCCTCGTCAGGTGTAGAAGCTGGAGCAGGGACAGGATGAACTGTATACCCCCCTCTCGCCGGAAACCTTGCACACGCAGGCGCTTCTGTAGACCTAACCATTTTCTCCCTACACCTAGCAGGGGTTTCATCTATCTTAGGAGCTATTAACTTTATTACAACAATTATCAATATGAAACCCCCAGCCATCTCACAATACCAAACACCATTGTTTGTATGGTCAGTCTTAATTACAGCAGTACTACTTCTATTATCACTACCAGTACTGGCCGCAGGCATTACAATGTTATTAACGGACCGAAACTTAAACACAACATTCTTTGACCCAGCAGGAGGAGGAGACCCAATCCTTTACCAACATTTATTCTGATTCTTTGGC
>8249_3663|Pimelodus.grosskopfii|COI-5P
ATGACCAAATTTATAACGTCATCGTAACTGCTCATGCCTTCGTAATAATTTTCTTCATAGTAATGCCAATCATGATTGGGGGATTCGGAAACTGATTAATCCCACTAATGATTGGAGCACCAGATATGGCATTCCCACGAATAAATAACATAAGCTTCTGACTTCTACCCCCATCGTTCCTCCTCCTCCTTGCCTCGTCAGGTGTAGAAGCTGGAGCAGGGACAGGATGAACTGTATACCCCCCTCTCGCCGGAAACCTTGCACACGCAGGCGCTTCTGTAGACCTAACCATTTTCTCCCTACACCTAGCAGGGGTTTCATCTATCTTAGGAGCTATTAATTTTATTACAACAATTATCAATATGAAACCCCCAGCCATCTCACAATACCAAACACCATTGTTTGTATGGTCAGTCTTAATTACAGCAGTACTACTTCTATTATCACTACCAGTACTGGCCGCAGGCATTACAATGTTATTAACGGACCGAAACTTAAACACAACATTCTTTGACCCAGCAGGAGGAGGAGACCCAATCCTTTACCAACATTTATTCTGATTCTTTGG
>8250_3663|Pimelodus.grosskopfii|COI-5P
CCCTCCTAGGCGATGACCAAATTTATAACGTCATCGTAACTGCTCATGCCTTCGTAATAATTTTCTTCATAGTAATGCCAATCATGATCGGGGGATTCGGAAACTGATTAATCCCACTAATGATTGGAGCACCAGATATGGCATTCCCACGAATAAATAACATAAGCTTCTGACTTCTACCCCCATCGTTCCTCCTCCTCCTTGCCTCGTCAGGTGTAGAAGCTGGAGCAGGGACAGGATGAACTGTATACCCCCCTCTCGCCGGAAACCTTGCACACGCAGGCGCTTCTGTAGACCTAACCATTTTCTCCCTACACCTAGCAGGGGTTTCATCTATCTTAGGAGCTATTAACTTTATTACAACAATTATCAATATGAAACCCCCAGCCATCTCACAATACCAAACACCATTGTTTGTATGGTCAGTCTTAATTACAGCAGTACTACTTCTATTATCACTACCAGTACTGGCCGCAGGCATTACAATGTTATTAACGGACCGAAACTTAAACACAACATTCTTTGACCCAGCAGGAGGAGGAGACCCAATCCTTTACCAACATTTATTCTGATTCTTTGG
>8251_3663|Pimelodus.grosskopfii|COI-5P
AGCTGGCCCAACCCGGCGCCCTCCTAGGCGATGACCAAATTTATAACGTCATCGTAACTGCTCATGCCTTCGTAATAATTTTCTTCATAGTAATGCCAATCATGATCGGGGGATTCGGAAACTGATTAATCCCACTAATGATTGGAGCACCAGATATGGCATTCCCACGAATAAATAACATAAGCTTCTGACTTCTACCCCCATCGTTCCTCCTCCTCCTTGCCTCGTCAGGTGTAGAAGCTGGAGCAGGGACAGGATGAACTGTATACCCCCCTCTCGCCGGAAACCTTGCACACGCAGGCGCTTCTGTAGACCTAACCATTTTCTCCCTACACCTAGCAGGGGTTTCATCTATCTTAGGAGCTATTAACTTTATTACAACAATTATCAATATGAAACCCCCAGCCATCTCACAATACCAAACACCATTGTTTGTATGGTCAGTCTTAATTACAGCAGTACTACTTCTATTATCACTACCAGTACTGGCCGCAGGCATTACAATGTTATTAACGGACCGAAACTTAAACACAACATTCTTTGACCCAGCAGGAGGAGGAGACCCAATCCTTTACCAACATTTATTCTGATTCTTTGG
>8245_3663|Pimelodus.grosskopfii|COI-5P
NNNNNNNNNNNNNNNNNNNNNNNNNNNNNNNNNNCCCTCCTAGGCGATGACCAAATTTATAACGTCATCGTAACTGCTCA
TGCCTTCGTAATAATTTTCTTCATAGTAATGCCAATCATGATCGGGGGATTCGGAAACTGATTAATCCCACTAATGATTG
GAGCACCAGATATGGCATTCCCACGAATAAATAACATAAGCTTCTGACTTCTACCCCCATCGTTCCTCCTCCTCCTTGCC
TCGTCAGGTGTAGAAGCTGGAGCGGGGACAGGATGAACTGTATACCCCCCTCTCGCCGGAAACCTTGCACACGCAGGCGC
TTCTGTAGACCTAACCATTTTCTCCCTACACCTAGCAGGGGTTTCATCTATCTTAGGAGCTATTAACTTTATTACAACAA
TTATCAATATGAAACCCCCAGCCATCTCACAATACCAAACACCATTGTTTGTATGGTCAGTCTTAATTACAGCAGTACTA
CTTCTATTATCACTACCAGTACT-GGCCGCAGGCATTACAATGTTATTAACGGACCGAAACTTAAACACAACATTCTTTG
ACCCAGCAGGAGGAGGAGAC
>8246_3663|Pimelodus.grosskopfii|COI-5P
TAACGTCATCGTAACTGCTCATGCCTTCGTAATAATTTTCTTCATAGTAATGCCAATCATGATCGGGGGATTCGGAAACTGATTAATCCCACTAATGATTGGAGCACCAGATATGGCATTCCCACGAATAAATAACATAAGCTTCTGACTTCTACCCCCATCGTTCCTCCTCCTCCTTGCCTCGTCAGGTGTAGAAGCTGGAGCGGGGACAGGATGAACTGTATACCCCCCTCTCGCCGGAAACCTTGCACACGCAGGCGCTTCTGTAGACCTAACCATTTTCTCCCTACACCTAGCAGGGGTTTCATCTATCTTAGGAGCTATTAACTTTATTACAACAATTATCAATATGAAACCCCCAGCCATCTCACAATACCAAACACCATTGTTTGTATGGTCAGTCTTAATTACAGCAGTACTACTTCTATTATCACTACCAGTACTGGCCGCAGGCATTACAATGTTATTAACGGACCGAAACTTAAACACAACATTCTTTGACCCAGCAGGAGGAGGAGACCCAATCCTTTACCAACATTTATTCTGATTCTTTGGCCAC
>7453_3786|Pimelodus.grosskopfii|COI-5P
CTTCTAATTCGGGCAGAGCTGGCCCAACCCGGCGCCCTCCTAGGCGATGACCAAATTTATAACGTCATCGTAACTGCTCA
TGCCTTCGTAATAATTTTCTTCATAGTAATGCCAATCATGATCGGGGGATTCGGAAACTGATTAATCCCACTAATGATTG
GAGCACCAGATATGGCATTCCCACGAATAAATAACATAAGCTTCTGACTTCTACCCCCATCGTTCCTCCTCCTCCTTGCC
TCGTCAGGTGTAGAAGCTGGAGCAGGGACAGGATGAACTGTATACCCCCCTCTCGCCGGAAACCTTGCACACGCAGGCGC
TTCTGTAGACCTAACCATTTTCTCCCTACACCTAGCAGGGGTTTCATCTATCTTAGGAGCTATTAACTTTATTACAACAA
TTATCAATATGAAACCCCCAGCCATCTCACAATACCAAACACCATTGTTTGTATGGTCAGTCTTAATTACAGCAGTACTA
CTTCTATTATCACTACCAGTACT-GGCCGCAGGCATTACAATGTTATTAACGGACCGAAACTTAAACACAACATTCTTTG
ACCCAGCAGGAGGAGGAGAC
>6528A_6528|Pimelodus.grosskopfii|COI-5P
CTCATGCCTTCGTAATAATTTTCTTCATAGTAATGCCAATCATGATCGGGGGATTCGGAAACTGATTAATCCCACTAATG
ATTGGAGCACCAGATATGGCATTCCCACGAATAAATAACATAAGCTTCTGACTTCTACCCCCATCGTTCCTCCTCCTCCT
TGCCTCGTCAGGTGTAGAAGCTGGAGCAGGGACAGGATGAACTGTATACCCCCCTCTCGCCGGAAACCTTGCACACGCAG
GCGCTTCTGTAGACCTAACCATTTTCTCCCTACACCTAGCAGGGGTTTCATCTATCTTAGGAGCTATTAACTTTATTACA
ACAATTATCAATATGAAACCCCCAGCCATCTCACAATACCAAACACCATTGTTTGTATGGTCAGTCTTAATTACAGCAGT
ACTACTTCTATTATCACTACCAGTACTGGCCGCAGGCATTACAATGTTATTAACGGACCGAAACTTAAACACAACATTCT
TTGACCCAGCAGGAGGAGGAGACCCAATCCTTTACCAACATTTATT
>5603B_5603|Chaetostoma.thomsoni|COI-5P
CACATGCTTTCGTAATAATTTTCTTTATAGTAATACCAATTATGATCGGGGGTTTCGGAAATTGACTAGTACCTCTGATA
ATTGGAGCTCCAGATATAGCCTTCCCCCGAATGAATAACATAAGCTTCTGATTACTTCCCCCATCATTCCTTCTCTTGTT
AGCCTCTTCAGGAGTTGAAGCAGGGGCAGGAACAGGTTGAACTGTATACCCCCCACTCGCCGGAAACCTAGCCCATGCAG
GGGCCTCAGTTGACCTGACCATCTTTTCTCTTCACTTAGCGGGTGTCTCCTCAATTCTTGGGGCAATTAACTTTATTACT
ACTATTATCAACATAAAACCCCCAGCTATCTCACAATACCAGACCCCTTTATTTGTATGAGCTGTGCTAATCACCGCCGT
CTTACTCCTGCTCTCTCTACCTGTCCTAGCTGCTGGCATTACAATATTGCTAACAGACCGAAACTTAAACACCACCTTCT
TTGACCCTGCAGGAGGCGGAGACCCAATCCTCTACCAACACTTAT
>5651B_5651|Pimelodus.grosskopfii|COI-5P
CTCATGCCTTCGTAATAATTTTCTTCATAGTAATGCCAATCATGATCGGGGGATTCGGAAACTGATTAATCCCACTAATG
ATTGGAGCACCAGATATGGCATTCCCACGAATAAATAACATAAGCTTCTGACTTCTACCCCCATCGTTCCTCCTCCTCCT
TGCCTCATCAGGTGTAGAAGCTGGAGCAGGGACAGGATGAACTGTATACCCCCCTCTCGCCGGAAACCTTGCACACGCAG
GCGCTTCTGTAGACCTGACCATTTTCTCCCTACACCTAGCAGGGGTTTCATCTATCTTAGGAGCTATTAACTTTATTACA
ACAATTATCAATATGAAACCCCCAGCCATCTCACAATACCAAACACCATTGTTTGTATGGTCAGTCTTAATTACAGCAGT
ACTACTTCTACTATCACTACCAGTACTGGCCGCAGGCATTACAATGTTATTAACGGACCGAAACTTAAACACAACATTCT
TTGACCCAGCAGGAGGAGGAGACCCAATCCTTTACCAACATTTATT
>5651A_5651|Pimelodus.grosskopfii|COI-5P
CTCATGCCTTCGTAATAATTTTCTTCATAGTAATGCCAATCATGATTGGGGGATTCGGAAACTGATTAATCCCACTAATG
ATTGGAGCACCAGATATGGCATTCCCACGAATAAATAACATAAGCTTCTGACTTCTACCCCCATCGTTCCTCCTCCTCCT
TGCCTCATCAGGTGTAGAAGCTGGAGCAGGGACAGGATGAACTGTATACCCCCCTCTCGCCGGAAACCTTGCACACGCAG
GCGCTTCTGTAGACCTGACCATTTTCTCCCTACACCTAGCAGGGGTTTCATCTATCTTAGGAGCTATTAACTTTATTACA
ACAATTATCAATATGAAACCCCCAGCCATCTCACAATACCAAACACCATTGTTTGTATGGTCAGTCTTAATTACAGCAGT
ACTACTTCTACTATCACTACCAGTACTGGCCGCAGGCATTACAATGTTATTAACGGACCGAAACTTAAACACAACATTCT
TTGACCCAGCAGGAGGAGGAGACCCAATCCTTTACCAACATTTATT
>6100D_6100|Pterygoplichthys.undecimalis|COI-5P
CACATGCCTTCGTAATAATTTTCTTTATAGTAATACCAATTATAATTGGAGGCTTCGGAAATTGACTAGTCCCACTAATG
ATTGGAGCACCCGACATAGCCTTCCCACGAATAAATAATATGAGCTTCTGACTACTCCCCCCATCATTCCTTCTCCTATT
AGCCTCCTCAGGAGTTGAAGCAGGGGCAGGAACAGGTTGAACTGTATATCCACCCCTCGCTGGAAACCTAGCCCATGCAG
GAGCTTCAGTTGATCTAACCATCTTTTCACTTCACCTAGCTGGTGTTTCTTCAATTTTAGGAGCAATTAACTTTATTACT
ACTATTATTAATATGAAACCCCCAGCCATTTCTCAATACCAAACTCCTTTATTCGTGTGGGCTGTACTTATTACAGCTGT
ATTACTCCTGCTTTCACTACCCGTTCTAGCTGCTGGTATTACAATATTACTAACAGACCGAAATTTAAATACTACCTTCT
TTGATCCTGCAGGAGGTGGAGACCCAATTCTATACCAACACTT
>6100E_6100|Pterygoplichthys.undecimalis|COI-5P
CACATGCCTTCGTAATAATTTTCTTTATAGTAATACCAATTATAATTGGAGGCTTCGGAAATTGACTAGTCCCACTAATG
ATTGGAGCACCCGACATAGCCTTCCCACGAATAAATAATATGAGCTTCTGACTACTCCCCCCATCATTCCTTCTCCTATT
AGCCTCCTCAGGAGTTGAAGCAGGGGCAGGAACAGGTTGAACTGTATATCCACCCCTCGCTGGAAACCTAGCCCATGCAG
GAGCTTCAGTTGATCTAACCATCTTTTCACTTCACCTAGCTGGTGTTTCTTCAATTTTAGGAGCAATTAACTTTATTACT
ACTATTATTAATATGAAACCCCCAGCCATTTCTCAATACCAAACTCCTTTATTCGTGTGGGCTGTACTTATTACAGCTGT
ATTACTCCTGCTTTCACTACCCGTTCTAGCTGCTGGTATTACAATATTACTAACAGACCGAAATTTAAATACTACCTTCT
TTGATCCTGCAGGAGGTGGAGACCCAATTCTATACCAACACTT
>5822_5822|Sturisomatichthys.leightoni|COI-5P
CTCATGCCTTCGTAATAATTTTCTTTATAGTAATACCCATCATGATTGGAGGCTTTGGAAACTGACTTATTCCACTAATG
ATTGGAGCCCCCGACATGGCATTCCCCCGAATAAATAACATAAGTTTCTGACTTCTACCCCCTTCCTTCCTTCTGCTACT
GGCCTCTTCGGGAGTTGAAGCAGGAGTTGGAACAGGATGAACCGTGTATCCCCCTCTTGCTGGAAACCTCGCCCACGCAG
GAGCTTCTGTAGATCTAACCATTTTCTCCCTGCACTTAGCAGGTGTCTCATCCATTCTGGGAGCCATTAATTTCATCACA
ACAATTATTAATATAAAACCTCCAGCCATCTCACAATACCAAACACCATTATTTGTGTGAGCCATACTGATTACAGCTGT
ACTGCTACTGCTATCCCTCCCAGTTCTTGCTGCCGGAATTACTATACTACTAACAGACCGAAATCTAAATACTACATTCT
TTGACCCAGCCGGGGGAGGAGACCAATTCCTCTACCAACACCTATT
>6157D_6157|Hypostomus.hondae|COI-5P
CACATGCCTTCGTAATAATTTTCTTTATAGTGATGCCAATTATAATTGGGGGCTTTGGAAACTGACTAGTTCCACTAATG
ATTGGAGCACCCGATATGGCCTTCCCACGAATAAATAATATGAGCTTCTGACTACTCCCCCCATCGTTTCTTCTCTTATT
AGCTTCCTCAGGGGTTGAAGCGGGAGCAGGAACAGGTTGAACTGTATACCCACCCCTCGCTGGAAATTTAGCCCATGCAG
GAGCTTCAGTTGACCTAACCATCTTTTCACTCCACCTGGCTGGTGTTTCTTCAATTTTAGGAGCAATTAACTTTATTACT
ACTATTATTAATATAAAACCCCCAGCTATTTCTCAATATCAAACTCCTTTATTTGTATGAGCTGTACTTGTTACAGCTGT
TCTACTCCTGCTCTCACTACCAGTTCTAGCCGCTGGTATTACAATATTATTAACAGACCGAAATTTAAATACCACCTTCT
TTGACCCTGCAGGAGGTGGAGACCCAATCCTCTACCAACACTT
>6483B_6483|Pimelodus.grosskopfii|COI-5P
CTCATGCCTTCGTAATAATTTTCTTCATAGTAATGCCAATCATGATTGGGGGATTCGGAAACTGATTAATCCCACTAATG
ATTGGAGCACCAGATATGGCATTCCCACGAATAAATAACATAAGCTTCTGACTTCTACCCCCATCGTTCCTCCTCCTCCT
TGCCTCATCAGGTGTAGAAGCTGGAGCAGGGACAGGATGAACTGTATACCCCCCTCTCGCCGGAAACCTTGCACACGCAG
GCGCTTCTGTAGACCTGACCATTTTCTCCCTACACCTAGCAGGGGTTTCATCTATCTTAGGAGCTATTAACTTTATTACA
ACAATTATCAATATGAAACCCCCAGCCATCTCACAATACCAAACACCATTGTTTGTATGGTCAGTCTTAATTACAGCAGT
ACTACTTCTACTATCACTACCAGTACTGGCCGCAGGCATTACAATGTTATTAACGGACCGAAACTTAAACACAACATTCT
TTGACCCAGCAGGAGGAGGAGACCCAATCCTTTACCAACATTTATT
>6614_6614|Sorubim.cuspicaudus|COI-5P
CTCATGCCTTCGTAATAATTTTCTTTATAGTAATACCAATCATAATTGGAGGATTCGGAAACTGATTAGTCCCACTAATA
ATTGGGGCACCAGACATGGCATTCCCACGAATAAATAACATAAGTTTCTGACTACTGCCCCCATCCTTCCTACTTCTGCT
CGCCTCCTCTGGAGTAGAAGCAGGGGCAGGAACAGGATGAACTGTGTACCCCCCTCTTGCCGGAAACCTAGCACATGCAG
GAGCTTCCGTGGACTTAACTATTTTTTCCCTTCATTTAGCAGGGGTGTCATCAATCCTTGGGGCCATTAACTTTATTACA
ACCATTATTAATATAAAACCCCCATCTATCTCACAATATCAGACACCATTATTTGTATGGTCCGTTCTAATTACAGCAGT
ACTTCTTCTACTATCTCTCCCAGTCTTAGCCGCAGGCATTACAATGTTATTAACAGACCGAAACTTGAATACTACATTCT
TTGACCCGGCAGGAGGGGGAGATCCAATCCTTTATCAACACTTAT
>6483C_6483|Pimelodus.grosskopfii|COI-5P
CTCATGCCTTCGTAATAATTTTCTTCATAGTAATACCAATCATGATTGGGGGATTCGGAAACTGATTAATCCCACTAATG
ATTGGAGCACCAGATATGGCATTCCCACGAATAAATAACATAAGCTTCTGACTTCTACCCCCATCGTTCCTCCTCCTCCT
TGCCTCATCAGGTGTAGAAGCTGGAGCAGGGACAGGATGAACTGTATACCCCCCTCTCGCCGGAAACCTTGCACACGCAG
GCGCTTCTGTAGACCTAACCATTTTCTCCCTACACCTAGCAGGGGTTTCATCTATCTTAGGAGCTATTAACTTTATTACA
ACAATTATCAATATGAAACCCCCAGCCATCTCACAATACCAAACACCATTGTTTGTATGGTCAGTCTTAATTACAGCAGT
ACTACTTCTACTATCACTACCAGTACTGGCCGCAGGCATTACAATGTTATTAACGGACCGAAACTTAAACACAACATTCT
TTGACCCAGCAGGAGGAGGAGACCCAATCCTTTACCAACATTTATT
>7448_2022|Pimelodus.yuma|COI-5P
CTTCTAATTCGGGCAGAGCTGGCCCAACCCGGCGCCCTCCTAGGCGATGACCAAATTTATAACGTCATCGTAACTGCTCA
TGCCTTCGTAATAATTTTCTTCATAGTAATGCCAATCATGATCGGGGGATTCGGAAACTGATTAATCCCACTAATGATTG
GAGCACCAGATATGGCATTCCCACGAATAAATAACATAAGCTTCTGACTTCTACCCCCATCGTTCCTCCTCCTCCTTGCC
TCGTCAGGTGTAGAAGCTGGAGCAGGGACAGGATGAACTGTATACCCCCCTCTCGCCGGAAACCTTGCACACGCAGGCGC
TTCTGTAGACCTAACCATTTTCTCCCTACACCTAGCAGGGGTTTCATCTATCTTAGGAGCTATTAACTTTATTACAACAA
TTATCAATATGAAACCCCCAGCCATCTCACAATACCAAACACCATTGTTTGTATGGTCAGTCTTAATTACAGCAGTACTA
CTTCTATTATCACTACCAGTACT-GGCCGCAGGCATTACAATGTTATTAACGGACCGAAACTTAAACACAACATTCTTTG
ACCCAGCAGGAGGAGGAGAC
>7773_4022|Pimelodus.grosskopffi|COI-5P
CCTCTACTTAGTATTTGGTGCCTGAGCCGGAATAGTTGGCACAGCCCTTAGCCTTCTAATTCGGGCAGAGCTGGCCCAAC
CCGGCGCCCTCCTAGGCGATGACCAAATTTATAACGTCATCGTAACTGCTCATGCCTTCGTAATAATTTTCTTCATAGTA
ATGCCAATCATGATCGGGGGATTCGGAAACTGATTAATCCCACTAATGATTGGAGCACCAGATATGGCATTCCCACGAAT
AAATAACATAAGCTTCTGACTTCTACCCCCATCGTTCCTCCTCCTCCTTGCCTCGTCAGGTGTAGAAGCTGGAGCAGGGA
CAGGATGAACTGTATACCCCCCTCTCGCCGGAAACCTTGCACACGCAGGCGCTTCTGTAGACCTAACCATTTTCTCCCTA
CACCTAGCAGGGGTTTCATCTATCTTAGGAGCTATTAACTTTATTACAACAATTATCAATATGAAACCCCCAGCCATCTC
ACAATACCAAACACCATTGTTTGTATGGTCAGTCTTAATTACAGCAGTACTACTTCTATTATCACTACCAGTACTGGCCG
CAGGCATTACAATGTTATTAACGGACCGAAACTTAAACACAACATTCTTTGACCCAGCAGGAGGAGGAGACCCAATCCTT
TACCAACATTTATTC
>7774_4022|Pimelodus.grosskopfii|COI-5P
CTTCTAATTCGGGCAGAGCTGGCCCAACCCGGCGCCCTCCTAGGCGATGACCAAATTTATAACGTCATCGTAACTGCTCA
TGCCTTCGTAATAATTTTCTTCATAGTAATGCCAATCATGATCGGGGGATTCGGAAACTGATTAATCCCACTAATGATTG
GAGCACCAGATATGGCATTCCCACGAATAAATAACATAAGCTTCTGACTTCTACCCCCATCGTTCCTCCTCCTCCTTGCC
TCGTCAGGTGTAGAAGCTGGAGCGGGGACAGGATGAACTGTATACCCCCCTCTCGCCGGAAACCTTGCACACGCAGGCGC
TTCTGTAGACCTAACCATTTTCTCCCTACACCTAGCAGGGGTTTCATCTATCTTAGGAGCTATTAACTTTATTACAACAA
TTATCAATATGAAACCCCCAGCCATCTCACAATACCAAACACCATTGTTTGTATGGTCAGTCTTAATTACAGCAGTACTA
CTTCTATTATCACTACCAGTACT-GGCCGCAGGCATTACAATGTTATTAACGGACCGAAACTTAAACACAACATTCTTTG
ACCCAGCAGGAGGAGGAGAC
>7770_4022|Pimelodus.grosskopfii|COI-5P
CTTCTAATTCGGGCAGAGCTGGCCCAACCCGGCGCCCTCCTAGGCGATGACCAAATTTATAACGTCATCGTAACTGCTCA
TGCCTTCGTAATAATTTTCTTCATAGTAATGCCAATCATGATCGGGGGATTCGGAAACTGATTAATCCCACTAATGATTG
GAGCACCAGATATGGCATTCCCACGAATAAATAACATAAGCTTCTGACTTCTACCCCCATCGTTCCTCCTCCTCCTTGCC
TCGTCAGGTGTAGAAGCTGGAGCAGGGACAGGATGAACTGTATACCCCCCTCTCGCCGGAAACCTTGCACACGCAGGCGC
TTCTGTAGACCTAACCATTTTCTCCCTACACCTAGCAGGGGTTTCATCTATCTTAGGAGCTATTAACTTTATTACAACAA
TTATCAATATGAAACCCCCAGCCATCTCACAATACCAAACACCATTGTTTGTATGGTCAGTCTTAATTACAGCAGTACTA
CTTCTATTATCACTACCAGTACT-GGCCGCAGGCATTACAATGTTATTAACGGACCGAAACTTAAACACAACATTCTTTG
ACCCAGCAGGAGGAGGAGAC
>7449_2022|Pimelodus.yuma|COI-5P
TCTAATTCGGGCAGAGCTGGCCCAACCTGGCGCCCTCCTAGGTGATGACCAAATTTACAACGTTATCGTTACTGCTCATG
CCTTCGTAATAATTTTCTTCATGGTAATACCAATCATGATTGGGGGATTTGGAAATTGATTAGTCCCACTAATAATTGGA
GCACCAGACATGGCATTCCCACGAATAAATAATATAAGTTTCTGACTTCTCCCACCATCATTCCTTCTCCTGCTTGCCTC
CTCAGGAGTTGAAGCCGGAGCAGGAACAGGATGAACTGTATACCCCCCTCTCGCCGGAAACCTTGCACATGCAGGGGCTT
CTGTAGACCTAACTATTTTCTCCCTTCATCTAGCAGGGGTATCATCCATTCTAGGAGCCATTAACTTCATCACAACAATT
ATTAACATGAAGCCCCCAGCAATTTCACAATACCAAACACCACTATTTGTATGATCAGTCCTAATTACAGCAGTCCTACT
TTTACTATCACTCCCCGTACTGGCCGCAGGCATTACAATGTTATTAACAGACCGAAACCTAAACACAACCTTCTTTGACC
CGGCAGGAGGAGGAGACCCAATCCTTTATCAACACCTATTC
>7451_2022|Pimelodus.yuma|COI-5P
CTTCTAATTCGGGCAGAGCTGGCCCAACCTGGCGCCCTCCTAGGTGATGACCAAATTTACAACGTTATCGTTACTGCTCA
TGCCTTCGTAATAATTTTCTTCATGGTAATACCAATCATGATTGGGGGATTTGGAAATTGATTAGTCCCACTAATAATTG
GAGCACCAGACATGGCATTCCCACGAATAAATAATATAAGTTTCTGACTTCTCCCACCATCATTCCTTCTCCTGCTTGCC
TCCTCAGGAGTTGAAGCCGGAGCAGGAACAGGATGAACTGTATACCCCCCTCTCGCCGGAAACCTTGCACATGCAGGGGC
TTCTGTAGACCTAACTATTTTCTCCCTTCATCTAGCAGGGGTATCATCCATTCTAGGAGCCATTAACTTCATCACAACAA
TTATTAACATGAAACCCCCAGCAATTTCACAATACCAAACACCACTATTTGTATGATCAGTCCTAATTACAGCAGTCCTA
CTTTTACTATCACTCCCCGTACT-GGCTGCAGGCATTACAATGTTATTAACAGACCGAAACCTAAACACAACCTTCTTTG
ACCCGGCAGGAGGAGGAGAC
>7764_4021|Pimelodus.yuma|COI-5P
CTTCTAATTCGGGCAGAGCTGGCCCAACCTGGCGCCCTCCTAGGTGATGACCAAATTTACAACGTTATCGTTACTGCTCA
TGCCTTCGTAATAATTTTCTTCATGGTAATACCAATCATGATTGGGGGGTTTGGAAATTGATTAGTCCCACTAATAATTG
GAGCACCAGACATGGCATTCCCACGAATAAATAATATAAGTTTCTGACTTCTCCCACCATCATTCCTTCTCCTGCTTGCC
TCCTCAGGAGTTGAAGCCGGAGCAGGAACAGGATGAACTGTATACCCCCCTCTCGCCGGAAACCTTGCACATGCAGGGGC
TTCTGTAGACCTAACTATTTTCTCCCTTCATCTAGCAGGGGTATCATCCATTCTAGGAGCCATTAACTTCATCACAACAA
TTATTAACATGAAGCCCCCAGCAATTTCACAATACCAAACACCACTATTTGTATGATCAGTCCTAATTACAGCAGTCCTA
CTTTTACTATCACTCCCCGTACT-GGCCGCAGGCATTACAATGTTATTAACAGACCGAAACCTAAACACAACCTTCTTTG
ACCCGGCAGGAGGAGGAGAC
>7762_4021|Pimelodus.yuma|COI-5P
CTTCTAATTCGGGCAGAGCTGGCCCAACCTGGCGCCCTCCTAGGTGATGACCAAATTTACAACGTTATCGTTACTGCTCA
TGCCTTCGTAATAATTTTCTTCATGGTAATACCAATCATGATTGGGGGATTTGGAAATTGATTAGTCCCACTAATAATTG
GAGCACCAGACATGGCATTCCCACGAATAAATAATATAAGTTTCTGACTTCTCCCACCATCATTCCTTCTCCTGCTTGCC
TCCTCAGGAGTTGAAGCCGGAGCAGGAACAGGATGAACTGTATACCCCCCTCTCGCCGGAAACCTTGCACATGCAGGGGC
TTCTGTAGACCTAACTATTTTCTCCCTTCATCTAGCAGGGGTATCATCCATTCTAGGAGCCATTAACTTCATCACAACAA
TTATTAACATGAAACCCCCAGCAATTTCACAATACCAAACACCACTATTTGTATGATCAGTCCTAATTACAGCAGTCCTA
CTTTTACTATCACTCCCCGTACT-GGCTGCAGGCATTACAATGTTATTAACAGACCGAAACCTAAACACAACCTTCTTTG
ACCCGGCAGGAGGAGGAGAC
>8235_3662|Pimelodus.yuma|COI-5P
TAGGTGATGACCAAATTTACAACGTTATCGTTACTGCTCATGCCTTCGTAATAATTTTCTTCATGGTAATACCAATCATGATTGGGGGATTTGGAAATTGATTAGTCCCACTAATAATTGGAGCACCAGACATGGCATTCCCACGAATAAATAATATAAGTTTCTGACTTCTCCCACCATCATTCCTTCTCCTGCTTGCCTCCTCAGGAGTTGAAGCCGGAGCAGGAACAGGATGAACTGTATACCCCCCTCTCGCCGGAAACCTTGCACATGCAGGGGCTTCTGTAGACCTAACTATTTTCTCCCTTCATCTAGCAGGGGTATCATCCATTCTAGGAGCCATTAACTTCATCACAACAATTATTAACATGAAGCCCCCAGCAATTTCACAATACCAAACACCACTATTTGTATGATCAGTCCTAATTACAGCAGTCCTACTTTTACTATCACTCCCCGTACTGGCCGCAGGCATTACAATGTTATTAACAGACCGAAACCTAAACACAACCTTCTTTGACCCGGCAGGAGGAGGAGACCCAATCCTTTATCAACACCTATTCTGATTCTTTGG
>8236_3662|Pimelodus.yuma|COI-5P
AGCTGGCCCAACCTGGCGCCCTCCTAGGTGATGACCAAATTTACAACGTTATCGTTACTGCTCATGCCTTCGTAATAATTTTCTTCATGGTAATACCAATCATGATTGGGGGATTTGGAAATTGATTAGTCCCACTAATAATTGGAGCACCAGACATGGCATTCCCACGAATAAATAATATAAGTTTCTGACTTCTCCCACCATCATTCCTTCTCCTGCTTGCCTCCTCAGGAGTTGAAGCCGGAGCAGGAACAGGATGAACTGTATACCCCCCTCTCGCCGGAAACCTTGCACATGCAGGGGCTTCTGTAGACCTAACTATTTTCTCCCTTCATCTAGCAGGGGTATCATCCATTCTAGGAGCCATTAACTTCATCACAACAATTATTAACATGAAGCCCCCAGCAATTTCACAATACCAAACACCACTATTTGTATGATCAGTCCTAATTACAGCAGTCCTACTTTTACTATCACTCCCCGTACTGGCCGCAGGCATTACAATGTTATTAACAGACCGAAACCTAAACACAACCTTCTTTGACCCGGCAGGAGGAGGAGACCCAATCCTTTATCAACACCTATTCTGATTCTTTGGC
>8237_3662|Pimelodus.yuma|COI-5P
CTGGCCCAACCTGGCGCCCTCCTAGGTGATGACCAAATTTACAACGTTATCGTTACTGCTCATGCCTTCGTAATAATTTTCTTCATGGTAATACCAATCATGATTGGGGGATTTGGAAATTGATTAGTCCCACTAATAATTGGAGCACCAGACATGGCATTCCCACGAATAAATAATATAAGTTTCTGACTTCTCCCACCATCATTCCTTCTCCTGCTTGCCTCCTCAGGAGTTGAAGCCGGAGCAGGAACAGGATGAACTGTATACCCCCCTCTCGCCGGAAACCTTGCACATGCAGGGGCTTCTGTAGACCTAACTATTTTCTCCCTTCATCTAGCAGGGGTATCATCCATTCTAGGGGCCATTAACTTCATCACAACAATTATTAACATGAAACCCCCAGCAATTTCACAATACCAAACACCACTATTTGTATGATCAGTCCTAATTACAGCAGTCCTACTTTTACTATCACTCCCCGTACTGGCTGCAGGCATTACAATGTTATTAACAGACCGAAACCTAAACACAACCTTCTTTGACCCGGCAGGAGGAGGAGACCCAATCCTTTATCAACACCTATTCTGATTCTTTGG
>8238_3662|Pimelodus.yuma|COI-5P
CCTCCTAGGTGATGACCAAATTTACAACGTTATCGTTACTGCTCATGCCTTCGTAATAATTTTCTTCATGGTAATACCAATCATGATTGGGGGATTTGGAAATTGATTAGTCCCACTAATAATTGGAGCACCAGACATGGCATTCCCACGAATAAATAATATAAGTTTCTGACTTCTCCCACCATCATTCCTTCTCCTGCTTGCCTCCTCAGGAGTTGAAGCCGGAGCAGGAACAGGATGAACTGTATACCCCCCTCTCGCCGGAAACCTTGCACATGCAGGGGCTTCTGTAGACCTAACTATTTTCTCCCTTCATCTAGCAGGGGTATCATCCATTCTAGGAGCCATTAACTTCATCACAACAATTATTAACATGAAGCCCCCAGCAATTTCACAATACCAAACACCACTATTTGTATGATCAGTCCTAATTACAGCAGTCCTACTTTTACTATCACTCCCCGTACTGGCCGCAGGCATTACAATGTTATTAACAGACCGAAACCTAAACACAACCTTCTTTGACCCGGCAGGAGGAGGAGACCCAATCCTTTATCAACACCTATTCTGATTCTTTGGCCACCC
>8239_3662|Pimelodus.yuma|COI-5P
AACCAACCACAAAGACATTGGCACCCTCTACTTAGTATTTGGTGCCTGAGCCGGAATAGTTGGCACAGCCCTTAGCCTTCTAATTCGGGCAGAGCTGGCCCAACCTGGCGCCCTCCTAGGTGATGACCAAATTTACAACGTTATCGTTACTGCTCATGCCTTCGTAATAATTTTCTTCATGGTAATACCAATCATGATTGGGGGATTTGGAAATTGATTAGTCCCACTAATAATTGGAGCACCAGACATGGCATTCCCACGAATAAATAATATAAGTTTCTGACTTCTCCCACCATCATTCCTTCTCCTGCTTGCCTCCTCAGGAGTTGAAGCCGGAGCAGGAACAGGATGAACTGTATACCCCCCTCTCGCCGGAAACCTTGCACATGCAGGGGCTTCTGTAGACCTAACTATTTTCTCCCTTCATCTAGCAGGGGTATCATCCATTCTAGGAGCCATTAACTTCATCACAACAATTATTAACATGAAACCCCCAGCAATTTCACAATACCAAACACCACTATTTGTATGATCAGTCCTAATTACAGCAGTCCTACTTTTACTATCACTCCCCGTACTGGCTGCAGGCATT
>6408_6408|Pimelodus.yuma|COI-5P
CTCATGCCTTCGTAATAATTTTCTTCATGGTAATACCAATCATGATTGGGGGATTTGGAAATTGATTAGTCCCACTAATA
ATTGGAGCACCAGACATGGCATTCCCACGAATAAATAATATAAGTTTCTGACTTCTCCCACCATCATTCCTTCTCCTGCT
TGCCTCCTCAGGAGTTGAAGCCGGAGCAGGAACAGGATGAACTGTATACCCCCCTCTCGCCGGAAACCTTGCACATGCAG
GGGCTTCTGTAGACCTAACTATTTTCTCCCTTCATCTAGCAGGGGTATCATCCATTCTAGGAGCCATTAACTTCATCACA
ACAATTATTAACATGAAGCCCCCAGCAATTTCACAATACCAAACACCACTATTTGTATGATCAGTCCTAATTACAGCAGT
CCTACTTTTACTATCACTCCCCGTACTGGCCGCAGGCATTACAATGTTATTAACAGACCGAAACCTAAACACAACCTTCT
TTGACCCGGCAGGAGGAGGAGACCCAATCCTTTATCAACACC
>6305C_6305|Chaetostoma.thomsoni|COI-5P
CACATGCTTTCGTAATAATTTTCTTTATAGTAATACCAATTATGATCGGGGGTTTCGGAAATTGACTAGTACCTCTGATA
ATTGGAGCTCCAGATATAGCCTTCCCCCGAATGAATAACATAAGCTTCTGATTACTTCCCCCATCATTCCTTCTCTTGTT
AGCCTCTTCAGGAGTTGAAGCAGGGGCAGGAACAGGTTGAACTGTATACCCCCCACTCGCCGGAAACCTAGCCCATGCAG
GGGCCTCAGTTGACCTGACCATCTTTTCTCTTCACTTAGCGGGTGTCTCCTCAATTCTTGGGGCAATTAACTTTATTACT
ACTATTATCAACATAAAACCCCCAGCTATCTCACAATACCAGACCCCTTTATTTGTATGAGCTGTGCTAATCACCGCCGT
CTTACTCCTGCTCTCTCTACCTGTCCTAGCTGCTGGCATTACAATATTGCTAACAGACCGAAACTTAAACACCACCTTCT
TTGACCCTGCAGGAGGCGGAGACCCAATCCTCTACCAACACTTAT
>6117B_6117|Pimelodus.yuma|COI-5P
CTCATGCCTTCGTAATAATTTTCTTCATGGTAATACCAATCATGATTGGGGGATTTGGAAATTGATTAGTCCCACTAATA
ATTGGAGCACCAGACATGGCATTCCCACGAATAAATAATATAAGTTTCTGACTTCTCCCACCATCATTCCTTCTCCTGCT
TGCCTCCTCAGGAGTTGAAGCCGGAGCAGGAACAGGATGAACTGTATACCCCCCTCTCGCCGGAAACCTTGCACATGCAG
GGGCTTCTGTAGACCTAACTATTTTCTCCCTTCATCTAGCAGGGGTATCATCCATTCTAGGAGCCATTAACTTCATCACA
ACAATTATTAACATGAAACCCCCAGCAATTTCACAATACCAAACACCACTATTTGTATGATCAGTCCTAATTACAGCAGT
CCTACTTTTACTATCACTCCCCGTACTGGCTGCAGGCATTACAATGTTATTAACAGACCGAAACCTAAACACAACCTTCT
TTGACCCAGCAGGAGGAGGAGACCCAATCCTTTATCAACACC
>7760_4021|Pimelodus.yuma|COI-5P
CTTCTAATTCGGGCAGAGCTGGCCCAACCTGGCGCCCTCCTAGGTGATGACCAAATTTACAACGTTATCGTTACTGCTCA
TGCCTTCGTAATAATTTTCTTCATGGTAATACCAATCATGATTGGGGGATTTGGAAATTGATTAGTCCCACTAATAATTG
GAGCACCAGACATGGCATTCCCACGAATAAATAATATAAGTTTCTGACTTCTCCCACCATCATTCCTTCTCCTGCTTGCC
TCCTCAGGAGTTGAAGCCGGAGCAGGAACAGGATGAACTGTATACCCCCCTCTCGCCGGAAACCTTGCACATGCAGGGGC
TTCTGTAGACCTAACTATTTTCTCCCTTCATCTAGCAGGGGTATCATCCATTCTAGGAGCCATTAACTTCATCACAACAA
TTATTAACATGAAGCCCCCAGCAATTTCACAATACCAAACACCACTATTTGTATGATCAGTCCTAATTACAGCAGTCCTA
CTTTTACTATCACTCCCCGTACT-GGCCGCAGGCATTACAATGTTATTAACAGACCGAAACCTAAACACAACCTTCTTTG
ACCCGGCAGGAGGAGGAGAC
>7765_4021|Pimelodus.yuma|COI-5P
CCTCTACTTAGTATTTGGTGCCTGAGCCGGAATAGTTGGCACAGCCCTTAGCCTTCTAATTCGGGCAGAGCTGGCCCAAC
CTGGCGCCCTCCTAGGTGATGACCAAATTTACAACGTTATCGTTACTGCTCATGCCTTCGTAATAATTTTCTTCATGGTA
ATACCAATCATGATTGGGGGATTTGGAAATTGATTAGTCCCACTAATAATTGGAGCACCAGACATGGCATTCCCACGAAT
AAATAATATAAGTTTCTGACTTCTCCCACCATCATTCCTTCTCCTGCTTGCCTCCTCAGGAGTTGAAGCCGGAGCAGGAA
CAGGATGAACTGTATACCCCCCTCTCGCCGGAAACCTTGCACATGCAGGGGCTTCTGTAGACCTAACTATTTTCTCCCTT
CATCTAGCAGGGGTATCATCCATTCTAGGAGCCATTAACTTCATCACAACAATTATTAACATGAAGCCCCCAGCAATTTC
ACAATACCAAACACCACTATTTGTATGATCAGTCCTAATTACAGCAGTCCTACTTTTACTATCACTCCCCGTACTGGCCG
CAGGCATTACAATGTTATTAACAGACCGAAACCTAAACACAACCTTCTTTGACCCGGCAGGAGGAGGAGACCCAATCCTT
TATCAACACCTATTC
>8196_3500|Pimelodus.yuma|COI-5P
CTTCTAATTCGGGCAGAGCTGGCCCAACCTGGCGCCCTCCTAGGTGATGACCAAATTTACAACGTTATCGTTACTGCTCA
TGCCTTCGTAATAATTTTCTTCATGGTAATACCAATCATGATTGGGGGATTTGGAAATTGATTAGTCCCACTAATAATTG
GAGCACCAGACATGGCATTCCCACGAATAAATAATATAAGTTTCTGACTTCTCCCACCATCATTCCTTCTCCTGCTTGCC
TCCTCAGGAGTTGAAGCCGGAGCAGGAACAGGATGAACTGTATACCCCCCTCTCGCCGGAAACCTTGCACATGCAGGGGC
TTCTGTAGACCTAACTATTTTCTCCCTTCATCTAGCAGGGGTATCATCCATTCTAGGAGCCATTAACTTCATCACAACAA
TTATTAACATAAAACCCCCAGCAATTTCACAATACCAAACACCACTATTTGTATGATCAGTCCTAATTACAGCAGTCCTA
CTTTTACTATCACTCCCCGTACT-GGCTGCAGGCATTACAATGTTATTAACAGACCGAAACCTAAACACAACCTTCTTTG
ACCCGGCAGGAGGAGGAGAC
>6618_6618|Eigenmannia.humboldtii|COI-5P
CCACGCCTTCGTAATAATCTTCTTCATGGTTATACCAATTATGATCGGAGGATTTGGGAACTGACTTATTCCCCTAATGA
TCGGAGCCCCCGACATAGCCTTCCCACGAATAAATAACATAAGCTTCTGACTACTCCCTCCTTCATTCCTGCTTCTTCTT
GCCTCCTCCGGGGTAGAGGCTGGAGCCGGTACAGGTTGAACCGTGTACCCCCCTCTTGCTGGGAACCTAGCTCACGCAGG
AGCCTCCGTAGACCTTACTATTTTTTCACTACACCTTGCCGGTGTTTCATCTATTCTAGGGTCAATCAACTTTATTACAA
CCATCATCAACATGAAACCGCCCGCCATTTCACAGTACCAAACCCCACTATTTATTTGAGCCACGCTAGTAACTACAGTT
CTCCTTCTACTATCTCTGCCTGTACTAGCCGCTGGTATTACCATGCTACTTACAGACCGGAACCTTAACACAACCTTCTT
TGACCCTGCAGGAGGTGGAGACCCAATTCTCTATCAACACCT
>6546D_6546|Eigenmannia.humboldtii|COI-5P
CCACGCCTTCGTAATAATCTTCTTCATGGTTATACCAATTATGATCGGAGGATTTGGGAACTGACTTATTCCCCTAATGA
TCGGAGCCCCCGACATAGCCTTCCCACGAATAAATAACATAAGCTTCTGACTACTCCCTCCTTCATTCCTGCTTCTTCTT
GCCTCCTCCGGGGTAGAGGCTGGAGCCGGTACAGGTTGAACCGTGTACCCCCCTCTTGCTGGGAACCTAGCTCACGCAGG
AGCCTCCGTAGACCTTACTATTTTTTCACTACACCTTGCCGGTGTTTCATCTATTCTAGGGTCAATCAACTTTATTACAA
CCATCATCAACATGAAACCGCCCGCCATTTCACAGTACCAAACCCCACTATTTATTTGAGCCACGCTAGTAACTACAGTT
CTCCTTCTACTATCTCTGCCTGTACTAGCCGCTGGTATTACCATGCTACTTACAGACCGGAACCTTAACACAACCTTCTT
TGACCCTGCAGGAGGTGGAGACCCAATTCTCTATCAACACCT
>6546A_6546|Eigenmannia.humboldtii|COI-5P
CCACGCCTTCGTAATAATCTTCTTCATGGTTATACCAATTATGATCGGAGGATTTGGGAACTGACTTATTCCCCTAATGA
TTGGAGCCCCCGACATAGCCTTCCCACGAATAAATAACATAAGCTTCTGACTACTCCCTCCTTCATTCCTGCTTCTTCTT
GCCTCCTCCGGGGTAGAGGCTGGAGCCGGTACAGGTTGAACCGTGTACCCCCCTCTTGCTGGGAACCTAGCTCACGCAGG
GGCCTCCGTAGACCTTACTATTTTTTCACTACACCTTGCCGGTGTTTCATCTATTCTAGGGTCAATCAACTTTATTACAA
CCATCATCAACATGAAACCGCCCGCCATTTCACAGTACCAAACCCCACTATTTATTTGAGCCACGCTAGTAACTACAGTT
CTCCTTCTACTATCTCTGCCTGTACTAGCCGCTGGTATCACCATGCTACTTACAGACCGGAACCTTAACACAACCTTCTT
TGACCCTGCAGGAGGTGGGGACCCAATTCTCTATCAACACCT
>6540_6540|Eigenmannia.humboldtii|COI-5P
CCACGCCTTCGTAATAATCTTCTTCATGGTTATACCAATTATGATCGGAGGATTTGGGAACTGACTAATTCCCCTAATGA
TCGGAGCCCCCGACATAGCCTTCCCACGAATAAATAACATAAGCTTCTGACTACTCCCTCCTTCATTCCTGCTTCTTCTT
GCCTCCTCCGGGGTAGAGGCTGGAGCCGGTACAGGTTGAACCGTGTACCCCCCTCTTGCTGGGAACCTAGCTCACGCAGG
GGCCTCCGTAGACCTTACTATTTTTTCACTACACCTTGCCGGTGTTTCATCTATTCTAGGGTCAATCAACTTTATTACAA
CCATCATCAACATGAAACCGCCCGCCATTTCACAGTACCAAACCCCACTATTTATTTGAGCCACGCTAGTAACTACAGTT
CTCCTTCTACTATCTCTGCCTGTACTAGCCGCTGGTATCACCATGCTACTTACAGACCGGAACCTTAACACAACCTTCTT
TGACCCTGCAGGAGGTGGGGACCCAATTCTCTATCAACACCT
>6546B_6546|Eigenmannia.humboldtii|COI-5P
CCACGCCTTCGTAATAATCTTCTTCATGGTTATACCAATTATGATCGGAGGATTTGGGAACTGACTTATTCCCCTAATGA
TCGGAGCCCCCGACATAGCCTTCCCACGAATAAATAACATAAGCTTCTGACTACTCCCTCNTTCATTCCTGCTTCTTCTT
GCCTCCTCCGGGGTAGAGGCTGGAGCCGGTACAGGTTGAACCGTGTACCCCCCTCTTGCTGGGAACCTAGCTCACGCAGG
AGCCTCCGTAGACCTTACTATTTTTTCACTACACCTTGCCGGTGTTTCATCTATTCTAGGGTCAATCAACTTTATTACAA
CCATCATCAACATGAAACCGCCCGCCATTTCACAGTACCAAACCCCACTATTTATTTGAGCCACGCTAGTAACTACAGTT
CTCCTTCTACTATCTCTGCCTGTACTAGCCGCTGGTATTACCATGCTACTTACAGACCGGNNNNNNNNNNNNNNNNNNNN
NNNNNNNNNNNNNNNNNNNNNNNNNNNNNNNNNNNNNNNNNN
>6194A_6194|Eigenmannia.humboldtii|COI-5P
CCACGCCTTCGTAATAATCTTCTTCATGGTTATACCAATTATGATCGGAGGATTTGGGAACTGACTTATTCCCCTAATGA
TCGGAGCCCCCGACATAGCCTTCCCACGAATAAATAACATAAGCTTCTGACTACTCCCTCCTTCATTCCTGCTTCTTCTT
GCCTCCTCCGGGGTAGAGGCTGGAGCCGGTACAGGTTGAACCGTGTACCCCCCTCTTGCTGGGAACCTAGCTCACGCAGG
AGCCTCCGTAGACCTTACTATTTTTTCACTACACCTTGCCGGTGTTTCATCTATTCTAGGGTCAATCAACTTTATTACAA
CCATCATCAACATGAAACCGCCCGCCATTTCACAGTACCAAACCCCACTATTTATTTGAGCCACGCTAGTAACTACAGTT
CTCCTTCTACTATCTCTGCCTGTACTAGCCGCTGGTATTACCATGCTACTTACAGACCGGAACCTTAACACAACCTTCTT
TGACCCTGCAGGAGGTGGAGACCCAATTCTCTATCAACACCT
>5541B_5541|Eigenmannia.humboldtii|COI-5P 
NNNNNNNNNNNNNNNNNNNNNNNNNNNNNNNNNNNNNNNNNNNNNNNNNNNNNNNNNNNNNNNNNNNNNTCCCCTAATGA
TTGGGGCCCCCGACATAGCCTTCCCACGAATAAACAACATAAGCTTCTGACTCCTCCCTCCTTCATTCCTGCTTCTTCTT
GCCTCCTCCGGAGTAGAAGCTGGGGCCGGGACAGGTTGAACCGTGTACCCCCCTCTTGCTGGAAATCTAGCCCACGCAGG
GGCCTCCGTAGACCTTACTATTTTTTCACTACACCTTGCTGGTGTCTCATCTATTTTAGGATCAATCAACTTTATTACAA
CCATCATCAACATGAAACCACCAGCCATTTCACAATACCAAACCCCCCTATTTATTTGAGCCACACTAGTAACCACAGTC
CTCCTTCTACTGTCCCTGCCTGTACTAGCCGCTGGCATTACCATGCTACTTACAGACCGAAACCTTAACACAACCTTCTT
TGACCCTGCAGGGGGTGGGGACCCAATCCTCTACCAACACCT
>6232_6232|Sternopygus.aequilabiatus|COI-5P 
CCACGCCTTTGTAATAATCTTCTTTATGGTTATACCAATCATAATTGGAGGCTTTGGAAATTGACTCATCCCCCTAATAA
TTGGAGCCCCAGATATAGCATTTCCACGAATAAATAACATAAGCTTTTGACTTCTCCCCCCCTCCTTTCTTCTTCTCCTA
GCCTCCTCTGGTGTTGAAGCTGGAGTAGGAACTGGTTGAACCGTCTACCCCCCTTTAGCTGGCAATCTCGCCCACGCCGG
AGCCTCAGTAGACTTAGCTATTTTCTCACTTCACCTTGCAGGAGTGTCTTCCATCCTAGGGTCAATCAACTTCATCACAA
CAATTATTAACATAAAACCCCCAGCCATCTCTCAATACCAAACACCCTTATTTATTTGAGCCCTACTCGTAACAACTGTC
CTTCTCCTCCTCTCTTTACCAGTTCTAGCTGCTGGAATTACCATACTACTTACAGACCGAAACCTCAACACAACATTCTT
TGACCCAGCAGGAGGGGGTGACCCAATCCTTTACCAACACTT
>8865_4835|Sternopygus.aequilabiatus|COI-5P
CCACGCCTTTGTAATAATCTTCTTTATGGTTATACCAATCATAATTGGAGGCTTTGGAAATTGACTCATCCCCCTAATAA
TTGGAGCCCCAGATATAGCATTTCCACGAATAAATAACATAAGCTTTTGACTTCTCCCCCCCTCCTTTCTTCTTCTCCTA
GCCTCCTCTGGTGTTGAAGCTGGAGTAGGAACTGGTTGAACCGTCTACCCCCCTTTAGCTGGCAATCTCGCCCACGCCGG
AGCCTCAGTAGACTTAGCTATTTTCTCACTTCACCTTGCAGGAGTGTCTTCCATCCTAGGGTCAATCAACTTCATCACAA
CAATTATTAACATAAAACCCCCAGCCATCTCTCAATACCAAACACCCTTATTTATTTGAGCCCTACTCGTAACAACTGTC
CTTCTCCTCCTCTCTTTACCAGTTCTAGCTGCTGGAATTACCATACTACTTACAGACCGAAACCTCAACACAACATTCTT
TGACCCAGCAGGAGGGGGTGACCCAATCCTTTACCAACACTT
>5549A_5549|Sternopygus.aequilabiatus|COI-5P 
CCACGCCTTTGTAATAATCTTCTTTATGGTTATACCAATCATAATTGGAGGCTTTGGAAATTGACTCATCCCCCTAATAA
TTGGAGCCCCAGATATAGCATTTCCACGAATAAATAACATAAGCTTTTGACTTCTCCCCCCCTCCTTTCTTCTTCTCCTA
GCCTCCTCTGGTGTTGAAGCTGGAGTAGGAACTGGTTGAACCGTCTACCCCCCTTTAGCTGGCAATCTCGCCCACGCCGG
AGCCTCAGTAGACTTAGCTATTTTCTCACTTCACCTTGCAGGAGTGTCTTCCATCCTAGGGTCAATCAACTTCATCACAA
CAATTATTAACATAAAACCCCCAGCCATCTCTCAATACCAAACACCCTTATTTATTTGAGCCCTACTCGTAACAACTGTC
CTTCTCCTCCTCTCTTTACCAGTTCTAGCTGCTGGAATTACCATACTACTTACAGACCGAAACCTCAACACAACATTCTT
TGACCCAGCAGGAGGGGGTGACCCAATCCTTTACCAACACNN
>7994_3478|Apteronotus.eschmeyeri|COI-5P 
CCATGCCTTCGTAATAATTTTCTTTATAGTTATGCCAATCATAATTGGAGGTTTTGGCAATTGACTCATCCCACTAATGA
TTGCCGCACCAGATATGGCATTCCCACGAATAAACAACATAAGCTTTTGACTACTTCCCCCATCATTCTTTCTACTTCTT
GCCTCCGCTGGCTTAGAAGCCGGAGTCGGGACAGGCTGAACCCTATACCCCCCCCTCGCTGGCAACGCAGCACACGCCGG
AGCTTCTGTAGACCTGACTATCTTCTCCCTTCACTTGGCCGGTGTCTCCTCTATCCTAGGCTCTATTAATTTTATTACCA
CAATTATTAATATAAAACCCCCAACAATATCTCAGTATCAACTTCCACTATTCATCTGATCCTTACTAGTAACCACCGTC
CTTCTACTACTCTCCCTTCCTGTCCTGGCTGCTGGCATTACTATACTTCTCACAGACCGAAACTTAAATACAGCATTCTT
CGACCCCACCGGAGGCGGGGACCCAATTTTATACCAACACCT
>7995_3478|Apteronotus.eschmeyeri|COI-5P 
CCATGCCTTCGTAATAATTTTCTTTATAGTTATGCCAATCATAATTGGAGGTTTTGGCAATTGACTCATCCCACTAATGA
TTGCCGCACCAGATATGGCATTCCCACGAATAAACAACATAAGCTTTTGACTACTTCCCCCATCATTCTTTCTACTTCTT
GCCTCCGCTGGCTTAGAAGCCGGAGTCGGGACAGGCTGAACCCTATACCCCCCCCTCGCTGGCAACGCAGCACACGCCGG
AGCTTCTGTAGACCTGACTATCTTCTCCCTTCACTTGGCCGGTGTCTCCTCTATCCTAGGCTCTATTAATTTTATTACCA
CAATTATTAATATAAAACCCCCAACAATATCTCAGTATCAACTTCCACTATTCATCTGATCCTTACTAGTAACCACCGTC
CTTCTACTACTCTCCCTTCCTGTCCTGGCTGCTGGCATTACTATACTTCTCACAGACCGAAACTTAAATACAGCATTCTT
CGACCCCACCGGAGGCGGGGACCCAATTTTATACCAACACCT
>7553_2537|Apteronotus.eschmeyeri|COI-5P 
CCATGCCTTCGTAATAATTTTCTTTATAGTTATGCCAATCATAATTGGAGGTTTTGGCAATTGACTCATCCCACTAATGA
TTGCCGCACCAGATATGGCATTCCCACGAATAAACAACATAAGCTTTTGACTACTTCCCCCATCATTCTTTCTACTTCTT
GCCTCCGCTGGCTTAGAAGCCGGAGTCGGGACAGGCTGAACCCTATACCCCCCCCTCGCTGGCAACGCAGCACACGCCGG
AGCTTCTGTAGACCTGACTATCTTCTCCCTTCACTTGGCCGGTGTCTCCTCTATCCTAGGCTCTATTAATTTTATTACCA
CAATTATTAATATAAAACCCCCAACAATATCTCAGTATCAACTTCCACTATTCATCTGATCCTTACTAGTAACCACCGTC
CTTCTACTACTCTCCCTTCCTGTCCTGGCTGCTGGCATTACTATACTTCTCACAGACCGAAACTTAAATACAGCATTCTT
CGACCCCACCGGAGGCGGGGACCCAATTTTATACCAACACCT
>8532_3778|Oncorhynchus.mykiss|COI-5P 
CCATGCCTTCGTTATGATTTTCTTTATAGTCATGCCAATTATAATCGGGGGCTTTGGAAACTGATTAATTCCCCTAATAA
TCGGAGCCCCTGATATGGCATTCCCTCGAATGAATAACATAAGCTTCTGACTCCTTCCTCCATCCTTTCTCCTCCTCCTG
TCTTCATCAGGAGTTGAAGCCGGCGCGGGTACTGGATGAACAGTATACCCCCCTCTAGCCGGCAACCTCGCCCACGCAGG
AGCCTCTGTTGATTTAACTATCTTCTCCCTTCATTTAGCTGGAATCTCCTCAATTTTAGGAGCCATTAATTTTATTACGA
CCATTATTAACATAAAACCTCCAGCCATCTCTCAGTACCAAACCCCCCTTTTCGTTTGAGCCGTGCTAGTTACTGCTGTC
CTTCTATTACTTTCCCTCCCCGTCCTGGCAGCAGGCATTACTATGTTACTTACAGACCGAAATCTAAACACCACTTTCTT
TGACCCGGCAGGCGGGGGAGATCCAATTTTNNNNNNNNNNNN
>8898_4874|Oncorhynchus.mykiss|COI-5P 
CCATGCCTTCGTTATGATTTTCTTTATAGTCATGCCAATTATAATCGGGGGCTTTGGAAACTGATTAATTCCCCTAATAA
TCGGAGCCCCTGATATGGCATTCCCTCGAATAAATAACATAAGCTTCTGACTCCTTCCTCCATCCTTTCTCCTCCTCCTG
TCTTCATCAGGAGTTGAAGCCGGCGCGGGTACTGGATGAACAGTATACCCCCCTCTAGCCGGCAACCTCGCCCACGCAGG
AGCCTCTGTTGATTTAACTATCTTCTCCCTTCATTTAGCTGGAATCTCCTCAATTTTAGGAGCCATTAATTTTATTACGA
CCATTATTAACATAAAACCTCCAGCCATCTCTCAGTACCAAACCCCCCTTTTCGTTTGAGCCGTGCTAGTTACTGCTGTC
CTTCTATTACTTTCCCTCCCCGTCCTGGCAGCAGGCATTACTATGTTACTTACAGACCGAAATCTAAACACCACTTTCTT
TGACCCGGCAGGCGGGGGAGATCCAATTTTATACCAACACCT
>8896_4874|Oncorhynchus.mykiss|COI-5P
CCATGCCTTCGTTATGATTTTCTTTATAGTCATGCCAATTATAATCGGGGGCTTTGGAAACTGATTAATTCCCCTAATAA
TCGGAGCCCCTGATATGGCATTCCCTCGAATAAATAACATAAGCTTCTGACTCCTTCCTCCATCCTTTCTCCTCCTCCTG
TCTTCATCAGGAGTTGAAGCCGGCGCGGGTACTGGATGAACAGTATACCCCCCTCTAGCCGGCAACCTCGCCCACGCAGG
AGCCTCTGTTGATTTAACTATCTTCTCCCTTCATTTAGCTGGAATCTCCTCAATTTTAGGAGCCATTAATTTTATTACGA
CCATTATTAACATAAAACCTCCAGCCATCTCTCAGTACCAAACCCCCCTTTTCGTTTGAGCCGTGCTAGTTACTGCTGTC
CTTCTATTACTTTCCCTCCCCGTCCTGGCAGCAGGCATTACTATGTTACTTACAGACCGAAATCTAAACACCNNNNNNNN
NNNNNNNNNNNNNNNNNNNNNNNNNNNNNNNNNNNNNNNNNN
>8897_4874|Oncorhynchus.mykiss|COI-5P 
CCATGCCTTCGTTATGATTTTCTTTATAGTCATGCCAATTATAATCGGGGGCTTTGGAAACTGATTAATTCCCCTAATAA
TCGGAGCCCCTGATATGGCATTCCCTCGAATAAATAACATAAGCTTCTGACTCCTTCCTCCATCCTTTCTCCTCCTCCTG
TCTTCATCAGGAGTTGAAGCCGGCGCGGGTACTGGATGAACAGTATACCCCCCTCTAGCCGGCAACCTCGCCCACGCAGG
AGCCTCTGTTGATTTAACTATCTTCTCCCTTCATTTAGCTGGGATCTCCTCAATTTTAGGAGCCATTAATTTTATTACGA
CCATTATTAACATAAAACCTCCAGCCATCTCTCAGTACCAAACCCCCCTTTTCGTTTGAGCCGTGCTAGTTACTGCTGTC
CTTCTATTACTTTCCCTCCCCGTCCTGGCAGCAGGCATTACTATGTTACTTACAGACCGAAATCTAAACACCACTTTCTT
TGACCCGGCAGGCGGGGGAGATCCAATTTTATACCAACACCT
>6128B_6128|Astyanax.magdalenae|COI-5P
ACACGCCTTCGTAATAATTTTCTTCATAGTAATACCCATTATGATTGGAGGCTTTGGAAACTGACTAATTCCTCTAATAA
TTGGAGCTCCCGACATAGCATTTCCACGAATAAACAATATGAGCTTCTGATTACTTCCCCCCTCATTTCTACTTCTACTA
GCCTCATCAGGAGTTGAAGCAGGGGCTGGAACGGGTTGAACTGTATACCCGCCCCTTGCTGGGAATCTGGCCCACGCAGG
GGCTTCAGTCGACCTAACTATCTTTTCCCTGCATTTAGCAGGTGTTTCATCCATCCTAGGGGCAATTAATTTCATCACCA
CAATTATTAATATAAAACCTCCAGCCATCTCACAATATCAAACCCCTTTATTCGTCTGAGCCCTATTAATCACAGCTGTT
TTACTTCTACTTTCTCTTCCAGTATTAGCTGCTGGAATTACGATACTACTAACAGACCGAAATCTGAATACCACATTCTT
CGACCCAGCGGGAGGAGGGGACCCCATCCTTTACCAACACCT
>8606_4300|Gilbertolus.atratoensis|COI-5P
TTTTTGGTGCCTGAGCCGGAATAGTTGGCACAGCCCTTAGCCTCCTAATCCGGGCTGAACTCAGTCAACCAGGAGCCCTC
TTAGGGGATGACCAAATCTACAACGTTATTGTAACCGCACATGCTTTTGTAATAATCTTCTTTATAGTAATGCCGGTTAT
AATTGGAGGATTCGGAAACTGGCTTCTGCCTCTTATACTAGGGGCACCAGACATGGCTTTTCCTCGAATAAATAATATAA
GCTTTTGACTTCTCCCTCCCTCTTTTCTTCTTCTCCTAGCCTCTTCAGGGGTTGAAGCTGGGGCAGGGACCGGATGAACC
GTTTATCCCCCCCTTGCCGGCAACCTTGCCCACGCAGGGGCTTCTGTAGACCTGACCATTTTTTCACTTCACCTTGCCGG
AGTTTCCTCCATTTTAGGTGCTATTAATTTTATCACAACAATTATTAATATAAAACCTCCAGCCATCTCTCAATATCAAA
CCCCTTTGTTTGTGTGAGCCGTTCTAATTACAGCTGTTCTACTACTCCTTTCACTACCAGTATTAGCCGCAGGCATTACC
ATGCTTTTAACCGACCGAAACCTAAACACAACCTTCTTTGACCCAGCCGGGGGAGGGGACCCAATTCTCTACCAACA
>8621_4308|Gilbertolus.atratoensis|COI-5P
TTTTTGGTGCCTGAGCCGGAATAGTTGGCACAGCCCTTAGCCTCCTAATCCGGGCTGAACTCAGTCAACCAGGAGCCCTC
TTAGGGGATGACCAAATCTACAACGTTATTGTAACCGCACATGCTTTTGTAATAATCTTCTTTATAGTAATGCCGGTTAT
AATTGGAGGATTCGGAAACTGGCTTCTGCCTCTTATACTAGGGGCACCAGACATGGCTTTTCCTCGAATAAATAATATAA
GCTTTTGACTTCTCCCTCCCTCTTTTCTTCTTCTCCTAGCCTCTTCAGGGGTTGAAGCTGGGGCAGGGACCGGATGAACC
GTTTATCCCCCCCTTGCCGGCAACCTTGCCCACGCAGGGGCTTCTGTAGACCTGACCATTTTTTCACTTCACCTTGCCGG
AGTTTCCTCCATTTTAGGTGCTATTAATTTTATCACAACAATTATTAATATAAAACCTCCAGCCATCTCTCAATATCAAA
CCCCTTTGTTTGTGTGAGCCGTTCTAATTACAGCTGTTCTACTACTCCTTTCACTACCAGTATTAGCCGCAGGCATTACC
ATGCTTTTAACCGACCGAAACCTAAACACAACCTTCTTTGACCCAGCCGGGGGAGGGGACCCAATTCTCTACCAACA
>8627_4313|Gilbertolus.atratoensis|COI-5P
TTTTTGGTGCCTGAGCCGGAATAGTTGGCACAGCCCTTAGCCTCCTAATCCGGGCTGAACTCAGTCAACCAGGAGCCCTC
TTAGGGGATGACCAAATCTACAACGTTATTGTAACCGCACATGCTTTTGTAATAATCTTCTTTATAGTAATGCCGGTTAT
AATTGGAGGATTCGGAAACTGGCTTCTGCCTCTTATACTAGGGGCACCAGACATGGCTTTTCCTCGAATAAATAATATAA
GCTTTTGACTTCTCCCTCCCTCTTTTCTTCTTCTCCTAGCCTCTTCAGGGGTTGAAGCTGGGGCAGGGACCGGATGAACC
GTTTATCCCCCCCTTGCCGGCAACCTTGCCCACGCAGGGGCTTCTGTAGACCTGACCATTTTTTCACTTCACCTTGCCGG
AGTTTCCTCCATTTTAGGTGCTATTAATTTTATCACAACAATTATTAATATAAAACCTCCAGCCATCTCTCAATATCAAA
CCCCTTTGTTTGTGTGAGCCGTTCTAATTACAGCTGTTCTACTACTCCTTTCACTACCAGTATTAGCCGCAGGCATTACC
ATGCTTTTAACCGACCGAAACCTAAACACAACCTTCTTTGACCCAGCCGGGGGAGGGGACCCAATTCTCTACCAACA
>8631_4316|Gilbertolus.atratoensis|COI-5P
TTTTTGGTGCCTGAGCCGGAATAGTTGGCACAGCCCTTAGCCTCCTAATCCGGGCTGAACTCAGTCAACCAGGAGCCCTC
TTAGGGGATGACCAAATCTACAACGTTATTGTAACCGCACATGCTTTTGTAATAATCTTCTTTATAGTAATGCCGGTTAT
AATTGGAGGATTCGGAAACTGGCTTCTGCCTCTTATACTAGGGGCACCAGACATGGCTTTTCCTCGAATAAATAATATAA
GCTTTTGACTTCTCCCTCCCTCTTTTCTTCTTCTCCTAGCCTCTTCAGGGGTTGAAGCTGGGGCAGGGACCGGATGAACC
GTTTATCCCCCCCTTGCCGGCAACCTTGCCCACGCAGGGGCTTCTGTAGACCTGACCATTTTTTCACTTCACCTTGCCGG
AGTTTCCTCCATTTTAGGTGCTATTAATTTTATCACAACAATTATTAATATAAAACCTCCAGCCATCTCTCAATATCAAA
CCCCTTTGTTTGTGTGAGCCGTTCTAATTACAGCTGTTCTACTACTCCTTTCACTACCAGTATTAGCCGCAGGCATTACC
ATGCTTTTAACCGACCGAAACCTAAACACAACCTTCTTTGACCCAGCCGGGGGAGGGGACCCAATTCTCTACCAACA
>8632_4316|Gilbertolus.atratoensis|COI-5P
TTTTTGGTGCCTGAGCCGGAATAGTTGGCACAGCCCTTAGCCTCCTAATCCGGGCTGAACTCAGTCAACCAGGAGCCCTC
TTAGGGGATGACCAAATCTACAACGTTATTGTAACCGCACATGCTTTTGTAATAATCTTCTTTATAGTAATGCCGGTTAT
AATTGGAGGATTCGGAAACTGGCTTCTGCCTCTTATACTAGGGGCACCAGACATGGCTTTTCCTCGAATAAATAATATAA
GCTTTTGACTTCTCCCTCCCTCTTTTCTTCTTCTCCTAGCCTCTTCAGGGGTTGAAGCTGGGGCAGGGACCGGATGAACC
GTTTATCCCCCCCTTGCCGGCAACCTTGCCCACGCAGGGGCTTCTGTAGACCTGACCATTTTTTCACTTCACCTTGCCGG
AGTTTCCTCCATTTTAGGTGCTATTAATTTTATCACAACAATTATTAATATAAAACCTCCAGCCATCTCTCAATATCAAA
CCCCTTTGTTTGTGTGAGCCGTTCTAATTACAGCTGTTCTACTACTCCTTTCACTACCAGTATTAGCCGCAGGCATTACC
ATGCTTTTAACCGACCGAAACCTAAACACAACCTTCTTTGACCCAGCCGGGGGAGGGGACCCAATTCTCTACCAACA
>8697_4430|Gilbertolus.atratoensis|COI-5P
TTTTTGGTGCCTGAGCCGGAATAGTTGGCACAGCCCTTAGCCTCCTAATCCGGGCTGAACTCAGTCAACCAGGAGCCCTC
TTAGGGGATGACCAAATCTACAACGTTATTGTAACCGCACATGCTTTTGTAATAATCTTCTTTATAGTAATGCCGGTTAT
AATTGGAGGATTCGGAAACTGGCTTCTGCCTCTTATACTAGGGGCACCAGACATGGCTTTTCCTCGAATAAATAATATAA
GCTTTTGACTTCTCCCTCCCTCTTTTCTTCTTCTCCTAGCCTCTTCAGGGGTTGAAGCTGGGGCAGGGACCGGATGAACC
GTTTATCCCCCCCTTGCCGGCAACCTTGCCCACGCAGGGGCTTCTGTAGACCTGACCATTTTTTCACTTCACCTTGCCGG
AGTTTCCTCCATTTTAGGTGCTATTAATTTTATCACAACAATTATTAATATAAAACCTCCAGCCATCTCTCAATATCAAA
CCCCTTTGTTTGTGTGAGCCGTTCTAATTACAGCTGTTCTACTACTCCTTTCACTACCAGTATTAGCCGCAGGCATTACC
ATGCTTTTAACCGACCGAAACCTAAACACAACCTTCTTTGACCCAGCCGGGGGAGGGGACCCAATTCTCTACCAACA
>8706_4427|Gilbertolus.atratoensis|COI-5P
TTTACATCGTTTTTGGTGCCTGAGCCGGAATAGTTGGCACAGCCCTTAGCCTCCTAATCCGGGCTGAACTCAGTCAACCA
GGAGCCCTCTTAGGGGATGACCAAATCTACAACGTTATTGTAACCGCACATGCTTTTGTAATAATCTTCTTTATAGTAAT
GCCGGTTATAATTGGAGGATTCGGAAACTGGCTTCTGCCTCTTATACTAGGGGCACCAGACATGGCTTTTCCTCGAATAA
ATAATATAAGCTTTTGACTTCTCCCTCCCTCTTTTCTTCTTCTCCTAGCCTCTTCAGGGGTTGAAGCTGGGGCAGGGACC
GGATGAACCGTTTATCCCCCCCTTGCCGGCAACCTTGCCCACGCAGGGGCTTCTGTAGACCTGACCATTTTTTCACTTCA
CCTTGCCGGAGTTTCCTCCATTTTAGGTGCTATTAATTTTATCACAACAATTATTAATATAAAACCTCCAGCCATCTCTC
AATATCAAACCCCTTTGTTTGTGTGAGCCGTTCTAATTACAGCTGTTCTACTACTCCTTTCACTACCAGTATTAGCCGCA
GGCATTACCATGCTTTTAACCGACCGAAACCTAAACACAACCTTCTTTGACCCAGCCGGGGGAGGGGACCCAATTCTCTA
CCAACACTTATT
>8740_4521|Gilbertolus.atratoensis|COI-5P
TTTTTGGTGCCTGAGCCGGAATAGTTGGCACAGCCCTTAGCCTCCTAATCCGGGCTGAACTCAGTCAACCAGGAGCCCTC
TTAGGGGATGACCAAATCTACAACGTTATTGTAACCGCACATGCTTTTGTAATAATCTTCTTTATAGTAATGCCGGTTAT
AATTGGAGGATTCGGAAACTGGCTTCTGCCTCTTATACTAGGGGCACCAGACATGGCTTTTCCTCGAATAAATAATATAA
GCTTTTGACTTCTCCCTCCCTCTTTTCTTCTTCTCCTAGCCTCTTCAGGGGTTGAAGCTGGGGCAGGGACCGGATGAACC
GTTTATCCCCCCCTTGCCGGCAACCTTGCCCACGCAGGGGCTTCTGTAGACCTGACCATTTTTTCACTTCACCTTGCCGG
AGTTTCCTCCATTTTAGGTGCTATTAATTTTATCACAACAATTATTAATATAAAACCTCCAGCCATCTCTCAATATCAAA
CCCCTTTGTTTGTGTGAGCCGTTCTAATTACAGCTGTTCTACTACTCCTTTCACTACCAGTATTAGCCGCAGGCATTACC
ATGCTTTTAACCGACCGAAACCTAAACACAACCTTCTTTGACCCAGCCGGGGGAGGGGACCCAATTCTCTACCAACA
>8807_4642|Gilbertolus.atratoensis|COI-5P
TTTACATCGTTTTTGGTGCCTGAGCCGGAATAGTTGGCACAGCCCTTAGCCTCCTAATCCGGGCTGAACTCAGTCAACCA
GGAGCCCTCTTAGGGGATGACCAAATCTACAACGTTATTGTAACCGCACATGCTTTTGTAATAATCTTCTTTATAGTAAT
GCCGGTTATAATTGGAGGATTCGGAAACTGGCTTCTGCCTCTTATACTAGGGGCACCAGACATGGCTTTTCCTCGAATAA
ATAATATAAGCTTTTGACTTCTCCCTCCCTCTTTTCTTCTTCTCCTAGCCTCTTCAGGGGTTGAAGCTGGGGCAGGGACC
GGATGAACCGTTTATCCCCCCCTTGCCGGCAACCTTGCCCACGCAGGGGCTTCTGTAGACCTGACCATTTTTTCACTTCA
CCTTGCCGGAGTTTCCTCCATTTTAGGTGCTATTAATTTTATCACAACAATTATTAATATAAAACCTCCAGCCATCTCTC
AATATCAAACCCCTTTGTTTGTGTGAGCCGTTCTAATTACAGCTGTTCTACTACTCCTTTCACTACCAGTATTAGCCGCA
GGCATTACCATGCTTTTAACCGACCGAAACCTAAACACAACCTTCTTTGACCCAGCCGGGGGAGGGGACCCAATTCTCTA
CCAACACTTATT
>8628_4314|Leporinus.striatus|COI-5P
CCTCTACCTAGTATTTGGTGCCTGAGCCGGAATAGTCGGCACAGCCCTTAGTCTTCTAATTCGAGCAGAGCTAAGTCAAC
CCGGATCCCTCTTGGGCGACGACCAAATTTATAATGTCATTGTTACCGCACATGCTTTTGTAATAATCTTCTTTATAGTT
ATACCAATTATAATTGGGGGCTTCGGAAACTGACTAGTACCACTAATGATCGGTGCACCCGACATAGCATTCCCACGAAT
AAATAACATAAGCTTCTGATTACTACCCCCCTCCTTTTTACTTCTACTAGCCTCTTCCGGCGTAGAAGCCGGGGCTGGAA
CAGGTTGAACTGTCTACCCACCCCTTGCTGGAAATTTAGCACATGCAGGCGCTTCCGTTGATTTAACTATTTTTTCCCTT
CATCTCGCTGGTGTGTCCTCAATTTTAGGGGCCATCAATTTTATTACGACTATTATTAATATAAAACCCCCAGCTATTTC
ACAATATCAAACCCCCCTGTTTGTCTGAGCTGTTTTAATTACGGCAGTACTTCTTCTTCTCTCATTACCCGTTCTGGCTG
CCGGAATTACTATACTTCTCACAGACCGAAATCTTAATACCACATTCTTTGACCCTGCCGGAGGAGGCGATCCAATTCTC
TATCAACATCTATTC
>8733_4517|Leporinus.striatus|COI-5P
CCTCTACCTAGTATTTGGTGCCTGAGCCGGAATAGTCGGCACAGCCCTTAGTCTTCTAATTCGAGCAGAGCTAAGTCAAC
CCGGATCCCTCTTGGGCGACGACCAAATTTATAATGTCATTGTTACCGCACATGCTTTTGTAATAATCTTCTTTATAGTT
ATACCAATTATAATTGGGGGCTTCGGAAACTGACTAGTACCACTAATGATCGGTGCACCCGACATAGCATTCCCACGAAT
AAATAACATAAGCTTCTGATTACTACCCCCCTCCTTTTTACTTCTACTAGCCTCTTCCGGCGTAGAAGCCGGGGCTGGAA
CAGGTTGAACTGTCTACCCACCCCTTGCTGGAAATTTGGCACATGCAGGCGCTTCCGTTGATTTAACTATTTTTTCCCTT
CATCTCGCTGGTGTGTCCTCAATTTTAGGGGCCATCAATTTTATTACGACTATTATTAATATAAAACCCCCAGCTATTTC
ACAATATCAAACCCCCCTGTTTGTCTGAGCTGTTTTAATTACGGCAGTACTTCTTCTTCTCTCATTACCCGTTCTGGCTG
CCGGAATTACTATACTTCTCACAGACCGAAATCTTAATACCACATTCTTTGACCCTGCCGGAGGAGGCGATCCAATTCTC
TATCAACATCTATTC
>8798_4621|Leporinus.striatus|COI-5P
CCTCTACCTAGTATTTGGTGCCTGAGCCGGAATAGTCGGCACAGCCCTTAGTCTTCTAATTCGAGCAGAGCTAAGTCAAC
CCGGATCCCTCTTGGGCGACGACCAAATTTATAATGTCATTGTTACCGCACATGCTTTTGTAATAATCTTCTTTATAGTT
ATACCAATTATAATTGGGGGCTTCGGAAACTGACTAGTACCACTAATGATCGGTGCACCCGACATAGCATTCCCACGAAT
AAATAACATAAGCTTCTGATTACTACCCCCCTCCTTTTTACTTCTACTAGCCTCTTCCGGCGTAGAAGCCGGGGCTGGAA
CAGGTTGAACTGTCTACCCACCCCTTGCTGGAAATTTAGCACATGCAGGCGCTTCCGTTGATTTAACTATTTTTTCCCTT
CATCTCGCTGGTGTGTCCTCAATTTTAGGGGCCATCAATTTTATTACGACTATTATTAATATAAAACCCCCAGCTATTTC
ACAATATCAAACCCCCCTGTTTGTCTGAGCTGTTTTAATTACGGCAGTACTTCTTCTTCTCTCATTACCCGTTCTGGCTG
CCGGAATTACTATACTTCTCACAGACCGAAATCTTAATACCACATTCTTTGACCCTGCCGGAGGAGGCGATCCAATTCTC
TATCAACATCTATTC
>8805_4640|Leporinus.striatus|COI-5P
CCTCTACCTAGTATTTGGTGCCTGAGCCGGAATAGTCGGCACAGCCCTTAGTCTTCTAATTCGAGCAGAGCTAAGTCAAC
CCGGATCCCTCTTGGGCGACGACCAAATTTATAATGTCATTGTTACCGCACATGCTTTTGTAATAATCTTCTTTATAGTT
ATACCAATTATAATTGGGGGCTTCGGAAACTGACTAGTACCACTAATGATCGGTGCACCCGACATAGCATTCCCACGAAT
AAATAACATAAGCTTCTGATTACTACCCCCCTCCTTTTTACTTCTACTAGCCTCTTCCGGCGTAGAAGCCGGGGCTGGAA
CAGGTTGAACTGTCTACCCACCCCTTGCTGGAAATTTAGCACATGCAGGCGCTTCCGTTGATTTAACTATTTTTTCCCTT
CATCTCGCTGGTGTGTCCTCAATTTTAGGGGCCATCAATTTTATTACGACTATTATTAATATAAAACCCCCAGCTATTTC
ACAATATCAAACCCCCCTGTTTGTCTGAGCTGTTTTAATTACGGCAGTACTTCTTCTTCTCTCATTACCCGTTCTGGCTG
CCGGAATTACTATACTTCTCACAGACCGAAATCTTAATACCACATTCTTTGACCCTGCCGGAGGAGGCGATCCAATTCTC
TATCAACATCTATTC
>8747_4526|Megaleporinus.muyscorum|COI-5P
CCTTTATTTAGTATTTGGTGCATGAGCCGGAATAGTTGGTACAGCCCTTAGTCTTCTAATTCGAGCGGAACTTAGTCAAC
CCGGGTCTCTCCTGGGCGATGACCAGATTTATAATGTTATTGTTACCGCACATGCATTTGTAATAATTTTCTTTATAGTT
ATACCAATTATGATTGGGGGCTTTGGAAACTGGTTAGTACCACTAATAATCGGCGCACCCGACATAGCATTTCCACGAAT
AAATAACATAAGCTTCTGACTGCTGCCCCCTTCTTTTCTTCTTCTACTAGCCTCTTCCGGAGTAGAGGCCGGAGCCGGAA
CAGGTTGAACTGTTTACCCCCCACTTGCTGGAAACTTAGCACACGCAGGGGCTTCCGTCGACTTAACCATTTTTTCACTC
CATCTCGCCGGCGTTTCCTCAATTCTTGGGGCTATCAACTTTATTACAACTATTATTAATATAAAACCACCAGCCATCTC
ACAATATCAAACCCCCCTATTTGTCTGGGCCGTCCTAATCACAGCGGTTCTTCTTCTTCTTTCCCTTCCAGTTCTGGCTG
CCGGGATTACAATGCTCCTAACAGACCGAAACCTTAATACCACATTCTTTGACCCTGCAGGAGGGGGGGACCCTATTTTA
TATCAACACTTATTC
>8611_4303|Astyanax.atratoensis|COI-5P
CCTCTACTTAGTATTTGGTGCCTGAGCTGGAATAGTTGGCACAGCCCTTAGCCTCCTTATCCGAGCAGAACTAAGTCAAC
CTGGCTCCTTACTAGGCGACGATCAAATTTATAATGTTATCGTAACTGCACATGCATTTGTGATAATCTTCTTTATAGTA
ATACCAGTAATAATTGGTGGCTTCGGAAACTGACTTGTTCCTCTAATGATCGGTGCCCCCGATATGGCCTTTCCCCGGAT
AAATAATATGAGTTTCTGACTCTTGCCCCCATCCTTCCTTCTCCTACTAGCCTCATCTGGGGTCGAAGCTGGAGCAGGGA
CAGGTTGGACTGTTTATCCACCACTCGCCGGGAATCTCGCACATGCAGGGGCTTCTGTAGACCTAACTATCTTCTCACTC
CACCTTGCCGGGGTGTCTTCCATTTTAGGGGCAATCAACTTTATTACCACTATTATTAATATAAAACCACCAGCCATTTC
GCAATATCAAACGCCCTTATTTGTATGAGCTGTTCTAATTACAGCTGTCCTTCTTCTTCTATCATTACCCGTACTAGCAG
CCGCAATTACGATACTCCTAACAGACCGAAATCTCAATACCTCATTCTTTGATCCTGCGGGAGGGGGGGACCCAATCCTT
TATCAACAT
>8612_4303|Astyanax.atratoensis|COI-5P
CCTCTACCTAGTGTTCGGTGCCTGAGCCGGAATAGTCGGCACAGCCCTTAGTCTTCTAATTCGAGCAGAACTCAGCCAAC
CCGGATCCCTGTTAGGCGATGACCAGATTTATAATGTTATTGTTACTGCACACGCATTCGTAATAATTTTCTTCATGGTT
ATACCAGTAATAATTGGAGGTTTTGGAAATTGACTCGTACCCCTAATGATCGGGGCCCCAGACATGGCCTTTCCACGAAT
AAATAATATGAGTTTTTGACTTCTACCCCCATCCTTCCTCCTACTCTTGGCCTCTTCAGGTGTTGAAGCCGGAGCAGGAA
CAGGCTGAACTGTATATCCCCCGCTCGCAGGAAACTTAGCTCACGCAGGGGCCTCCGTAGATTTAACCATCTTCTCCCTA
CATCTTGCAGGAGTTTCTTCAATTCTAGGAGCAATCAACTTTATTACAACAATTATTAACATAAAACCCCCAGCCATCTC
CCAATATCAAACACCCTTATTTGTCTGAGCCGTGTTAATTACAGCCGTCCTCCTACTCCTCTCCCTACCAGTACTAGCAG
CCGGAATCACCATGCTTCTAACGGACCGAAATCTTAACACCACCTTCTTTGACCCCGCAGGAGGAGGAGACCCAATCCTC
TACCAACAC
>8638_4319|Roeboides.dayi|COI-5P
CCTTTATCTAGTATTCGGTGCCTGAGCCGGAATAGTTGGCACAGCCCTCAGCCTTCTGATCCGGGCGGAATTAAGCCAGC
CCGGGGCACTACTGGGCGATGACCAAATTTATAATGTTATTGTAACTGCACATGCATTTGTAATAATCTTCTTTATAGTA
ATACCCGTAATGATTGGGGGCTTTGGAAACTGACTTGTACCACTCATGATTGGTGCCCCAGACATAGCTTTTCCTCGAAT
AAATAATATGAGCTTCTGACTCCTACCCCCATCCTTCCTCCTACTCTTAGCCTCGTCTGGCGTAGAGGCGGGGGCAGGGA
CCGGATGAACTGTATATCCGCCCCTTGCAGGCAATCTTGCACACGCAGGAGCTTCAGTAGATTTAACCATCTTTTCTCTT
CATTTGGCCGGAGTTTCCTCTATCCTAGGGGCTATTAACTTTATCACAACTATTATTAACATAAAACCCCCAGCCATCAC
ACAGTATCAAACCCCTCTATTCGTCTGAGCTGTCCTAGTGACAGCTGTCCTCCTTCTCTTATCCTTGCCAGTCCTAGCAG
CAGGAATTACAATACTACTAACAGACCGTAACCTAAATACTACATTCTTCGACCCAGCAGGAGGGGGAGATCCCATCCTC
TACCAACAC
>8639_4319|Roeboides.dayi|COI-5P
CCTTTATCTAGTATTCGGTGCCTGAGCCGGAATAGTTGGCACAGCCCTCAGCCTTCTAATCCGGGCGGAATTAAGCCAGC
CCGGGGCACTACTGGGCGATGACCAAATTTATAATGTTATTGTAACTGCACATGCATTTGTAATAATCTTCTTTATAGTA
ATACCCGTAATGATTGGGGGCTTTGGAAACTGACTTGTACCACTCATGATTGGTGCCCCAGACATAGCTTTTCCTCGAAT
AAATAATATGAGCTTCTGACTCCTACCCCCATCCTTCCTCCTACTCTTAGCCTCGTCTGGCGTAGAGGCGGGGGCAGGGA
CCGGATGAACTGTATATCCGCCCCTTGCAGGCAATCTTGCACACGCAGGAGCTTCAGTAGATTTAACCATCTTTTCTCTT
CATTTGGCCGGAGTTTCCTCTATCCTAGGGGCTATTAACTTTATCACAACTATTATTAACATAAAACCCCCAGCCATCAC
GCAGTATCAAACCCCTCTATTCGTCTGAGCTGTCCTAGTGACAGCTGTCCTCCTTCTCTTATCCTTGCCAGTCCTGGCAG
CAGGAATTACAATACTACTAACAGACCGTAACCTAAATACTACATTCTTCGACCCAGCAGGAGGGGGAGATCCCATCCTC
TACCAACAC
>8642_4332|Roeboides.dayi|COI-5P
CCTTTATCTAGTATTCGGTGCCTGAGCCGGAATAGTTGGCACAGCCCTCAGCCTTCTGATCCGGGCGGAATTAAGCCAGC
CCGGGGCACTACTGGGCGATGACCAAATTTATAATGTTATTGTAACTGCACATGCATTTGTAATAATCTTCTTTATAGTA
ATACCCGTAATGATTGGGGGCTTTGGAAACTGACTTGTACCACTCATGATTGGTGCCCCAGACATAGCTTTTCCTCGAAT
AAATAATATGAGCTTCTGACTCCTACCCCCATCCTTCCTCCTACTCTTAGCCTCGTCTGGCGTAGAGGCGGGGGCAGGGA
CCGGATGAACTGTATATCCGCCCCTTGCAGGCAATCTTGCACACGCAGGAGCTTCAGTAGATTTAACCATCTTTTCTCTT
CATTTGGCCGGAGTTTCCTCTATCCTAGGGGCTATTAACTTTATCACAACTATTATTAACATAAAACCCCCAGCCATCAC
ACAGTATCAAACCCCTCTATTCGTCTGAGCTGTCCTAGTGACAGCTGTCCTCCTTCTCTTATCCTTGCCAGTCCTAGCAG
CAGGAATTACAATACTACTAACAGACCGTAACCTAAATACTACATTCTTCGACCCAGCAGGAGGGGGAGATCCCATCCTC
TACCAACACCTATTC
>8647_4495|Roeboides.dayi|COI-5P
CCTTTATCTAGTATTCGGTGCCTGAGCCGGAATAGTTGGCACAGCCCTCAGCCTTCTAATCCGGGCGGAATTAAGCCAGC
CCGGGGCACTACTGGGCGATGACCAAATTTATAATGTTATTGTAACTGCACATGCATTTGTAATAATCTTCTTTATAGTA
ATACCCGTAATGATTGGGGGCTTTGGAAACTGACTTGTACCACTCATGATTGGTGCCCCAGACATAGCTTTTCCTCGAAT
AAATAATATGAGCTTCTGACTCCTACCCCCATCCTTCCTCCTACTCTTAGCCTCGTCTGGCGTAGAGGCGGGGGCAGGGA
CCGGATGAACTGTATATCCGCCCCTTGCAGGCAATCTTGCACACGCAGGAGCTTCAGTAGATTTAACCATCTTTTCTCTT
CATTTGGCCGGGGTTTCCTCTATCCTAGGGGCTATTAACTTTATCACAACTATTATTAACATAAAACCCCCAGCCATCAC
GCAGTATCAAACCCCTCTATTCGTCTGAGCTGTCCTAGTGACAGCTGTCCTCCTTCTCTTATCCTTGCCAGTCCTGGCAG
CAGGAATTACAATACTACTAACAGACCGTAACCTAAATACTACATTCTTCGACCCAGCAGGAGGGGGAGATCCCATCCTC
TACCAACAC
>8695_4431|Roeboides.dayi|COI-5P
CCTTTATCTAGTATTCGGTGCCTGAGCCGGAATAGTTGGCACAGCCCTCAGCCTTCTGATCCGGGCGGAATTAAGCCAGC
CCGGGGCACTACTGGGCGATGACCAAATTTATAATGTTATTGTAACTGCACATGCATTTGTAATAATCTTCTTTATAGTA
ATACCCGTAATGATTGGGGGCTTTGGAAACTGACTTGTACCACTCATGATTGGTGCCCCAGACATAGCTTTTCCTCGAAT
AAATAATATGAGCTTCTGACTCCTACCCCCATCCTTCCTCCTACTCTTAGCCTCGTCTGGCGTAGAGGCGGGGGCAGGGA
CCGGATGAACTGTATATCCGCCCCTTGCAGGCAATCTTGCACACGCAGGAGCTTCAGTAGATTTAACCATCTTTTCTCTT
CATTTGGCCGGAGTTTCCTCTATCCTAGGGGCTATTAACTTTATCACAACTATTATTAACATAAAACCCCCAGCCATCAC
ACAGTATCAAACCCCTCTATTCGTCTGAGCTGTCCTAGTGACAGCTGTCCTCCTTCTCTTATCCTTGCCAGTCCTGGCAG
CAGGAATTACAATACTACTAACAGACCGTAACCTAAATACTACATTCTTCGACCCAGCAGGAGGGGGAGATCCCATCCTC
TACCAACACCTATTC
>8702_4433|Roeboides.dayi|COI-5P
CCTTTATCTAGTATTCGGTGCCTGAGCCGGAATAGTTGGCACAGCCCTCAGCCTTCTGATCCGGGCGGAATTAAGCCAGC
CCGGGGCACTACTGGGCGATGACCAAATTTATAATGTTATTGTAACTGCACATGCATTTGTAATAATCTTCTTTATAGTA
ATACCCGTAATGATTGGGGGCTTTGGAAACTGACTTGTACCACTCATGATTGGTGCCCCAGACATAGCTTTTCCTCGAAT
AAATAATATGAGCTTCTGACTCCTACCCCCATCCTTCCTCCTACTCTTAGCCTCGTCTGGCGTAGAGGCGGGGGCAGGGA
CCGGATGAACTGTATATCCGCCCCTTGCAGGCAATCTTGCACACGCAGGAGCTTCAGTAGATTTAACCATCTTTTCTCTT
CATTTGGCCGGAGTTTCCTCTATCCTAGGGGCTATTAACTTTATCACAACTATTATTAACATAAAACCCCCAGCCATCAC
ACAGTATCAAACCCCTCTATTCGTCTGAGCTGTCCTAGTGACAGCTGTCCTCCTTCTCTTATCCTTGCCAGTCCTGGCAG
CAGGAATTACAATACTACTAACAGACCGTAACCTAAATACTACATTCTTCGACCCGGCAGGAGGGGGAGATCCCATCCTC
TACCAACACCTATTC
>8751_4530|Roeboides.dayi|COI-5P
CCTTTATCTAGTATTCGGTGCCTGAGCCGGAATAGTTGGCACAGCCCTCAGCCTTCTGATCCGGGCGGAATTAAGCCAGC
CCGGGGCACTACTGGGCGATGACCAAATTTATAATGTTATTGTAACTGCACATGCATTTGTAATAATCTTCTTTATAGTA
ATACCCGTAATGATTGGGGGCTTTGGAAACTGACTTGTACCACTCATGATTGGTGCCCCAGACATAGCTTTTCCTCGAAT
AAATAATATGAGCTTCTGACTCCTACCCCCATCCTTCCTCCTACTCTTAGCCTCGTCTGGCGTAGAGGCGGGGGCAGGGA
CCGGATGAACTGTATATCCGCCCCTTGCAGGCAATCTTGCACATGCAGGAGCTTCAGTAGATTTAACCATCTTTTCTCTT
CATTTGGCCGGAGTTTCCTCTATCCTAGGGGCTATTAACTTTATCACAACTATTATTAACATAAAACCCCCAGCCATCAC
GCAGTATCAAACCCCTCTATTCGTCTGAGCTGTCCTAGTGACAGCTGTCCTCCTTCTCTTATCCTTGCCAGTCCTGGCAG
CAGGAATTACAATACTACTAACAGACCGTAACCTAAATACTACATTCTTCGACCCAGCAGGAGGGGGAGATCCCATCCTC
TACCAACAC
>8759_4538|Roeboides.dayi|COI-5P
CCTTTATCTAGTATTCGGTGCCTGAGCCGGAATAGTTGGCACAGCCCTCAGCCTTCTGATCCGGGCGGAATTAAGCCAGC
CCGGGGCACTACTGGGCGATGACCAAATTTATAATGTTATTGTAACTGCACATGCATTTGTAATAATCTTCTTTATAGTA
ATACCCGTAATGATTGGGGGCTTTGGAAACTGACTTGTACCACTCATGATTGGTGCCCCAGACATAGCTTTTCCTCGAAT
AAATAATATGAGCTTCTGACTCCTACCCCCATCCTTCCTCCTACTCTTAGCCTCGTCTGGCGTAGAGGCGGGGGCAGGGA
CCGGATGAACTGTATATCCGCCCCTTGCAGGCAATCTTGCACACGCAGGAGCTTCAGTAGATTTAACCATCTTTTCTCTT
CATTTGGCCGGAGTTTCCTCTATCCTAGGGGCTATTAACTTTATCACAACTATTATTAACATAAAACCCCCAGCCATCAC
ACAGTATCAAACCCCTCTATTCGTCTGAGCTGTCCTAGTGACAGCTGTCCTCCTTCTCTTATCCTTGCCAGTCCTGGCAG
CAGGAATTACAATACTACTAACAGACCGTAACCTAAATACTACATTCTTCGACCCAGCAGGAGGGGGAGATCCCATCCTC
TACCAACAC
>8767_4535|Roeboides.dayi|COI-5P
CCTTTATCTAGTATTCGGTGCCTGAGCCGGAATAGTTGGCACAGCCCTCAGCCTTCTGATCCGGGCGGAATTAAGCCAGC
CCGGGGCACTACTGGGCGATGACCAAATTTATAATGTTATTGTAACTGCACATGCATTTGTAATAATCTTCTTTATAGTA
ATACCCGTAATGATTGGGGGCTTTGGAAACTGACTTGTACCACTCATGATTGGTGCCCCAGACATAGCTTTTCCTCGAAT
AAATAATATGAGCTTCTGACTCCTACCCCCATCCTTCCTCCTACTCTTAGCCTCGTCTGGCGTAGAGGCGGGGGCAGGGA
CCGGATGAACTGTATATCCGCCCCTTGCAGGCAATCTTGCACACGCAGGAGCTTCAGTAGATTTAACCATCTTTTCTCTT
CATTTGGCCGGAGTTTCCTCTATCCTAGGGGCTATTAACTTTATCACAACTATTATTAACATAAAACCCCCAGCCATCAC
ACAGTATCAAACCCCTCTATTCGTCTGAGCTGTCCTAGTGACAGCTGTCCTCCTTCTCTTATCCTTGCCAGTCCTGGCAG
CAGGAATTACAATACTACTAACAGACCGTAACCTAAATACTACATTCTTCGACCCAGCAGGAGGGGGAGATCCCATCCTC
TACCAACAC
>8672_4503|Geophagus.pellegrini|COI-5P
TCTATTTAGTATTTGGTGCTTGAGCTGGAATAGTAGGCACTGCGTTAAGCCTGCTAATCCGAGCAGAACTCAGCCAGCCC
GGCTCTCTCCTTGGAGATGACCAAATTTATAATGTAATTGTTACCGCTCACGCCTTTGTAATAATTTTCTTTATGGTAAT
GCCAATCATAATTGGAGGCTTTGGTAACTGACTCGTACCACTAATGATTGGTGCTCCTGACATAGCCTTTCCCCGAATAA
ACAACATGAGCTTTTGACTCCTCCCCCCCTCATTTCTACTCCTCCTGGCCTCCTCGGGAGTTGAAGCCGGGGTGGGAACA
GGATGAACAGTATACCCCCCACTAGCAGGCAACCTAGCACATGCCGGCCCGTCTGTTGACCTGGCTATTTTCTCACTTCA
CTTGGCCGGAGTCTCCTCAATCCTAGGGGCAATCAATTTTATTACTACTATTTTTAACATAAAACCTCCAGCAATCTCCC
AATATCAAACACCCTTATTTGTATGGGCAGTTCTCATTACTGCCGTCCTTCTCCTTCTATCTCTGCCGGTTCTTGCTGCA
GGCATTACCATGCTCTTGACCGATCGAAACCTAAACACAACCTTTTTTGACCCTGCAGGAGGAGGAGACCCCATCCTTTA
TCAACATTTGTT
>8716_4455|Geophagus.pellegrini|COI-5P
TATTTAGTATTTGGTGCTTGAGCTGGAATAGTAGGCACTGCGTTAAGCCTGCTAATCCGAGCAGAACTCAGCCAGCCCGG
CTCTCTCCTTGGAGATGACCAAATTTATAATGTAATTGTTACCGCTCACGCCTTTGTAATAATTTTCTTTATGGTAATGC
CAATCATAATTGGAGGCTTTGGTAACTGACTCGTACCACTAATGATTGGTGCTCCTGACATAGCCTTTCCCCGAATAAAC
AACATGAGCTTTTGACTCCTCCCCCCCTCATTTCTACTCCTCCTGGCCTCCTCGGGAGTTGAAGCCGGGGTGGGAACAGG
ATGAACAGTATACCCCCCACTAGCAGGCAACCTAGCACATGCCGGCCCGTCTGTTGACCTGGCTATTTTCTCACTTCACT
TGGCCGGAGTCTCCTCAATCCTAGGGGCAATCAATTTTATTACTACTATTTTTAACATAAAACCTCCAGCAATCTCCCAA
TATCAAACACCCTTATTTGTATGGGCAGTTCTCATTACTGCCGTCCTTCTCCTTCTATCTCTGCCGGTTCTTGCTGCAGG
CATTACCATGCTCTTGACCGATCGAAACCTAAACACAACCTTTTTTGACCCTGCAGGAGGAGGAGACCCCATCCTTTATC
AACATTTGTTTT
>8717_4456|Mesoheros.atratomaculatus|COI-5P
ACATTGGCACCCTTTACCTAGTTTTTGGTGCCTGAGCCGGAATGGTAGGAACCGCATTAAGCCTATTAATCCGAGCAGAACTTAGCCAGCCAGGCTCTCTCCTTGGAGACGACCAGATCTATAATGTAATCGTAACTGCACACGCCTTTGTAATAATTTTCTTTATAGTCATGCCTATTATAATTGGGGGCTTCGGAAACTGACTGATTCCGCTTATGATCGGCGCCCCAGACATAGCCTTCCCACGAATAAACAACATGAGCTTTTGGCTTCTGCCTCCCTCATTCCTCCTCCTCCTCACCTCATCAGGAGTTGAAGCTGGCGCCGGAACAGGGTGAACCGTCTACCCCCCACTAGCAAGTAACCTGGCACACGCTGGCCCCTCAGTCGACTTGACCATCTTTTCCCTTCACTTAGCGGGGGTCTCCTCTATTCTTGGGGCAATTAATTTTATTACCACAATTATCAATATGAAGCCCCCAGCAATCTCCCAGTATCAAACACCCCTATTTATCTGAGCACTTTTAATTACCGCCGTCCTACTTTTGCTATCCCTACCAGTCCTTGCCGCTGGCATTACTATACTTTTAACCGACCGAAACCTAAACACAACCTTTTTCGACCCGGCCGGAGGAGGAGACCCCATTCTCTACCAACATCTGTTCTGATTCTTT
>8670_4489|Caquetaia.krausii|COI-5P
GACATTGGCACCCTCTACCTAATTTTTGGTGCCTGGGCCGGAATAGTAGGCACCGCCCTGAGCCTACTAATCCGAGCAGAACTCAGCCAACCAGGCTCTCTCCTTGGAGATGATCAGATCTATAATGTAATCGTAACTGCGCACGCCTTTGTAATAATTTTCTTTATAGTCATGCCCATCATAATCGGGGGCTTTGGCAACTGACTAATCCCACTCATGATCGGCGCCCCTGACATGGCCTTCCCTCGAATAAACAATATGAGCTTTTGACTGCTGCCCCCTTCATTCCTCCTCCTCCTCGCCTCCTCAGGGGTTGAAGCCGGCGCTGGGACAGGCTGAACCGTCTACCCCCCACTAGCAGGTAACCTGGCACATGCCGGCCCCTCAGTCGACCTTACTATCTTTTCCCTCCACCTGGCCGGGGTCTCCTCCATCCTTGGAGCAATCAACTTTATCACCACAATCGTCAACATAAAACCCCCAGCCATCTCCCAATATCAAACACCCCTGTTCATTTGAGCGCTCTTAATTACCGCCGTCCTACTCCTTCTATCCCTCCCAGTTCTTGCCGCCGGCATTACCATGCTTCTAACCGACCGAAACCTAAACACGACCTTTTTTGACCCGGCGGGGGGCGGGGATCCCATTCTTTATCAACACTTGTTCTGATTCT
>8656_4489|Caquetaia.krausii|COI-5P
GACATTGGCACCCTCTACCTAATTTTTGGTGCCTGGGCCGGAATAGTAGGCACCGCCCTGAGCCTACTAATCCGAGCAGAACTCAGCCAACCAGGCTCTCTCCTTGGAGATGATCAGATCTATAATGTAATCGTAACTGCGCACGCCTTTGTAATAATTTTCTTTATAGTCATGCCCATCATAATCGGGGGCTTTGGCAACTGACTAATCCCACTCATGATCGGCGCCCCTGACATGGCCTTCCCTCGAATAAACAATATGAGCTTTTGACTGCTGCCCCCTTCATTCCTCCTCCTCCTCGCCTCCTCAGGGGTTGAAGCCGGCGCTGGGACAGGCTGAACCGTCTACCCCCCACTAGCAGGTAACCTGGCACATGCCGGCCCCTCAGTCGACCTTACTATCTTTTCCCTCCACCTGGCCGGGGTCTCCTCCATCCTTGGAGCAATCAACTTTATCACCACAATCGTCAACATAAAACCCCCAGCCATCTCCCAATATCAAACACCCCTGTTCATTTGAGCGCTCTTAATTACCGCCGTCCTACTCCTTCTATCCCTCCCAGTTCTTGCCGCCGGCATTACCATGCTTCTAACCGACCGAAACCTAAACACGACCTTTTTTGACCCGGCGGGGGGCGGGGATCCCATTCTTTATCAACACTTGTTCTGATTCT
>8619_4307|Andinoacara.latifrons|COI-5P
TTTATCTAGTATTTGGTGCCTGAGCCGGAATAGTGGGGACTGCACTAAGCCTACTAATTCGAGCAGAACTAAGCCAGCCA
GGCTCACTCCTTGGAGACGACCAAATTTATAATGTCATTGTAACCGCACATGCCTTTGTAATAATTTTCTTTATAGTCAT
GCCCATCATAATTGGAGGCTTTGGAAACTGACTTATCCCACTAATGCTTGGAGCCCCAGACATGGCCTTCCCACGTATAA
ATAATATGAGCTTCTGACTACTGCCCCCTTCATTCCTTCTTCTATTGGCCTCTTCAGGAGTTGAAGCAGGGGCAGGGACA
GGATGAACTGTTTATCCCCCGCTTGCCGGTAATCTAGCACACGCTGGGCCTTCTGTAGATCTAACCATCTTTTCTCTACA
TTTAGCCGGTGTTTCCTCAATTCTAGGTGCAATTAATTTTATTACCACAATTATTAATATAAAACCCCCAGCTATTTCTC
TGTATCAAATCCCTTTATTCGTATGAGCCCTTCTAATTACCGCTGTTCTTCTTTTATTGTCCCTTCCCGTGCTTGCCGCT
GGTATCACAATACTCTTAACTGACCGAAACCTAAATACCACCTTTTTTGACCCTGCAGGGGGAGGAGACCCTATTCTTTA
TCAACACTTATTC
>8661_4491|Steindachnerina.atratoensis|COI-5P
TCTTTACCTAATTTTCGGCACATGGGCGGGCATAGCCGGCACAGCACTTAGCCTTCTAATCCGCGCAGAACTAGGACAGC
CCGGAACTCTCTTAGGAGACGACCAAATTTACAATGTAATCGTCACAGCCCATGCTTTCGTCATAATCTTCTTTATAGTT
ATACCCATCATGATCGGTGGCTTCGGAAACTGACTAGTCCCGCTTATAATCGGTGCCCCAGACATAGCATTCCCCCGCAT
AAATAACATAAGCTTCTGACTCCTCCCTCCCTCCTTCCTTCTCCTACTAGCCTCATCTACCGTAGAAGCTGGGGCCGGCA
CAGGATGGACAGTTTACCCCCCTTTAGCCGGCAACCTAGCCCACGCTGGCGCATCAGTAGACCTAGCCATCTTTTCATTA
CACTTAGCAGGTGTTTCCTCCATTCTAGGAGCCATCAACTTTATCACTACCATCATCAACATAAAACCCCCCGCACTGTC
ACAATACCAAACACCCCTATTCGTATGATCCGTCCTCATTACTGCCATCCTACTACTCCTCTCCTTACCCGTCCTAGCAG
CTGGGATTACCATACTACTTACCGACCGCAACCTTAACACCACATTCTTCGACCCAGCTGGAGGAGGAGACCCAATCCTA
TACCAACAC
>8662_4491|Steindachnerina.atratoensis|COI-5P
CCTCTACTTAGTATTTGGTGCCTGAGCCGGTATAGTTGGTACAGCCCTCAGCCTCCTAATTCGAGCAGAGCTTAGCCAAC
CCGGAGCCCTACTAGGTGACGATCAGATTTATAATGTTATCGTTACTGCACATGCCTTCGTTATAATTTTCTTTATAGTA
ATGCCAATTATAATTGGAGGCTTTGGAAACTGATTAATTCCCCTAATGATTGGGGCCCCCGATATAGCATTTCCTCGAAT
AAATAATATGAGTTTTTGACTATTACCCCCCTCATTTCTTCTTCTCCTATCTTCTTCTGGGGTTGAAGCTGGAGTAGGTA
CTGGCTGAACCGTATATCCACCTCTCGCTGGCAACCTCGCCCACGCAGGTGCTTCCGTTGATCTAGCTATTTTCTCTCTT
CATCTCGCTGGGGTCTCCTCAATTCTTGGAGCAATTAACTTTATCACAACCATTATTAACATGAAACCCCCAGCTATCTC
CCAATACCAAACCCCTTTATTCGTATGGGCCATTCTAATTACAGCTGTCCTCCTCCTTCTCTCCCTTCCCGTCCTGGCTG
CCGGAATTACCATGCTATTAACCGACCGAAATATTAATACCACATTCTTCGATCCTGCTGGTGGAGGAGACCCAATTTTA
TATCAACATCTATTT
>8663_4491|Steindachnerina.atratoensis|COI-5P
CCTCTACTTAGTATTTGGTGCCTGAGCCGGTATAGTTGGTACAGCCCTCAGCCTCCTAATTCGAGCAGAGCTTAGCCAAC
CCGGAGCCCTACTAGGTGACGATCAGATTTATAATGTTATCGTTACTGCACATGCCTTCGTTATAATTTTCTTTATAGTA
ATGCCAATTATAATCGGAGGCTTTGGAAACTGATTAATTCCCCTAATGATTGGGGCCCCCGATATAGCATTTCCTCGAAT
AAATAATATGAGTTTTTGACTATTACCCCCCTCATTTCTTCTTCTCCTATCTTCTTCTGGGGTTGAAGCTGGAGTAGGTA
CTGGCTGAACCGTATATCCACCTCTCGCTGGCAACCTCGCCCACGCAGGTGCTTCCGTTGATCTAGCTATTTTCTCTCTC
CATCTCGCTGGGGTCTCCTCAATTCTTGGAGCAATTAACTTTATCACAACCATTATTAACATGAAACCCCCAGCTATCTC
CCAATACCAAACCCCTTTATTCGTATGGGCCATTCTAATTACAGCTGTCCTCCTCCTTCTCTCCCTTCCCGTCCTGGCTG
CCGGAATTACCATGCTACTAACCGACCGAAATATTAATACCACATTCTTCGATCCTGCTGGTGGAGGAGACCCAATTTTA
TATCAACATCTA
>8666_4491|Steindachnerina.atratoensis|COI-5P
CCTCTACTTAGTATTTGGTGCCTGAGCCGGTATAGTTGGTACAGCCCTCAGCCTCCTAATTCGAGCAGAGCTTAGCCAAC
CCGGAGCCCTACTAGGTGACGATCAGATTTATAATGTTATCGTTACTGCACATGCCTTCGTTATAATTTTCTTTATAGTA
ATGCCAATTATAATCGGAGGCTTTGGAAACTGATTAATTCCCCTAATGATTGGGGCCCCCGATATAGCATTTCCTCGAAT
AAATAATATGAGTTTTTGACTATTACCCCCCTCATTTCTTCTTCTCCTATCTTCTTCTGGGGTTGAAGCTGGAGTAGGTA
CTGGCTGAACCGTATATCCACCTCTCGCTGGCAACCTCGCCCACGCAGGTGCTTCCGTTGATCTAGCTATTTTCTCTCTC
CATCTCGCTGGGGTCTCCTCAATTCTTGGAGCAATTAACTTTATCACAACCATTATTAACATGAAACCCCCAGCTATCTC
CCAATACCAAACCCCTTTATTCGTATGGGCCATTCTAATTACAGCTGTCCTCCTCCTTCTCTCCCTTCCCGTCCTGGCTG
CCGGAATTACCATGCTATTAACCGACCGAAATATTAATACCACATTCTTCGATCCTGCTGGTGGAGGAGACCCAATTTTA
TATCAACATCTATTT
>8667_4491|Steindachnerina.atratoensis|COI-5P
CCTCTACTTAGTATTTGGTGCCTGAGCCGGTATAGTTGGTACAGCCCTCAGCCTCCTAATTCGAGCAGAGCTTAGCCAAC
CCGGAGCCCTACTAGGTGACGATCAGATTTATAATGTTATCGTTACTGCACATGCCTTCGTTATAATTTTCTTTATAGTA
ATGCCAATTATAATCGGAGGCTTTGGAAACTGATTAATTCCCCTAATGATTGGGGCCCCCGATATAGCATTTCCTCGAAT
AAATAATATGAGTTTTTGACTATTACCCCCCTCATTTCTTCTTCTCCTATCTTCTTCTGGGGTTGAAGCTGGAGTAGGTA
CTGGCTGAACCGTATATCCACCTCTCGCTGGCAACCTCGCCCACGCAGGTGCTTCCGTTGATCTAGCTATTTTCTCTCTC
CATCTCGCTGGGGTCTCCTCAATTCTTGGAGCAATTAACTTTATCACAACCATTATTAACATGAAACCCCCAGCTATCTC
CCAATACCAAACCCCTTTATTCGTATGGGCCATTCTAATTACAGCTGTCCTCCTCCTTCTCTCCCTTCCCGTCCTGGCTG
CCGGAATTACCATGCTATTAACCGACCGAAATATTAATACCACATTCTTCGATCCTGCTGGTGGAGGAGACCCAATTTTA
TATCAACATCTATTT
>8609_4304|Cyphocharax.magdalenae|COI-5P
TGAGCCGGTATAGTTGGTACAGCCCTCAGCCTCCTAATTCGAGCAGAGCTTAGCCAACCCGGAGCCCTACTAGGTGACGA
TCAGATTTATAATGTTATCGTTACTGCACACGCCTTTGTAATAATTTTCTTTATAGTAATACCAATTATGATTGGAGGCT
TCGGAAACTGACTAGTACCTCTGATGATTGGAGCCCCTGACATAGCATTTCCTCGAATAAATAACATGAGTTTCTGACTT
CTACCCCCCTCATTCCTTCTTCTGCTATCCTCTTCTGGTGTTGAAGCCGGAGTAGGTACTGGCTGAACCGTATATCCACC
TCTTGCAGGCAACCTCGCCCACGCAGGTGCTTCCGTAGATTTAGCCATCTTTTCTCTTCATCTGGCAGGGGTATCCTCAA
TTCTTGGAGCAATTAATTTTATTACAACCATTATCAATATAAAACCCCCAGCAATTTCCCAATATCAAACCCCCTTATTT
GTTTGGGCCATTCTAATTACAGCTGTCCTTCTTCTTCTCTCCCTCCCAGTACTAGCTGCTGGTATTACCATGTTATTAAC
AGACCGAAACATCAACACAACCTTCTTTGACCCTGCCGGCGGAGGAGACCCGATCTTATATCAGCACCTAT
>8749_4527|Hoplias.malabaricus|COI-5P
GACATTGGCACCCTGTATCTAGTATTTGGTGCCTGAGCCGGAATAGTTGGTACAGCTCTCAGCCTTCTAATCCGAGCAGAGCTAAGCCAACCCGGGGCATTACTTGGCGATGACCAGATTTATAATGTTATCGTTACTGCACATGCCTTCGTGATAATTTTCTTCATAGTAATGCCCATTATGATCGGGGGATTCGGGAACTGACTTGTTCCCCTCATGATTGGAGCACCCGACATAGCCTTCCCGCGAATAAATAACATAAGTTTCTGACTTCTTCCTCCCTCATTACTTCTCCTGCTAGCCTCCTCCGGCGTAGAAGCAGGAGTTGGGACAGGTTGAACTGTCTACCCCCCTCTTGCCGGAAACCTTGCACACGCAGGGGCCTCCGTCGACCTGGCAATCTTTTCTCTCCATCTTGCAGGAGTCTCCTCAATTTTAGGAGCTATTAATTTTATCACAACAATTATTAACATAAAACCCCCTGCCATTTCACAATACCAAACCCCTCTATTTGTTTGAGCTATTTTAATTACGGCCGTCCTTCTTCTCCTCTCCCTCCCTGTTCTTGCTGCTGGAATCACAATACTTTTAACGGACCGAAACCTTAACACCACCTTCTTTGACCCTGCGGGGGGAGGAGACCCCATTCTTTATCAACATCTATTTTGATTCTTT
>8675_4499|Eigenmannia.virescens|COI-5P
TCTATATAGTATTTGGTGCCTGAGCCGGAATAGTCGGCACAGCCCTTAGCCTCCTAATTCGAGCAGAGCTAAGCCAGCCT
GGAGCTCTTCTAGGTGACGACCAAATTTATAACGTAATCGTCACTGCCCACGCCTTCGTAATAATCTTCTTCATGGTTAT
ACCAATTATGATTGGAGGATTTGGGAACTGACTTATCCCCCTAATGATTGGAGCCCCCGACATAGCCTTCCCACGAATAA
ATAACATAAGCTTCTGACTTCTCCCTCCTTCATTCCTGCTTCTTCTTGCCTCCTCCGGAGTAGAGGCTGGAGCCGGCACA
GGTTGAACCGTGTACCCCCCTCTTGCTGGGAACCTAGCTCACGCAGGGGCCTCCGTAGACCTTACTATTTTTTCACTACA
CCTTGCCGGTGTTTCATCTATTTTAGGATCAATTAACTTTATTACAACTATTATCAACATAAAACCACCAGCCATCTCAC
AATACCAAACCCCGCTGTTTATTTGAGCCACGCTAGTAACCACAGTTCTGCTTCTACTGTCTCTGCCTGTACTAGCCGCT
GGTATTACCATGCTACTTACAGACCGAAACCTTAACACAACCTTCTTTGACCCTGCAGGAGGTGGGGACCCAATTCTCTA
CCAACACCTA
>8736_4519|Eigenmannia.virescens|COI-5P
TCTATATAGTATTTGGTGCCTGAGCCGGAATAGTCGGCACAGCCCTTAGCCTCCTAATTCGAGCAGAGCTAAGCCAGCCT
GGAGCTCTTCTAGGTGACGACCAAATTTATAACGTAATCGTCACTGCCCACGCCTTCGTAATAATCTTCTTCATGGTTAT
ACCAATTATGATTGGAGGATTTGGGAACTGACTTATCCCCCTAATGATTGGAGCCCCCGACATAGCCTTCCCACGAATAA
ATAACATAAGCTTCTGACTTCTCCCTCCTTCATTCCTGCTTCTTCTTGCCTCCTCCGGAGTAGAGGCTGGAGCCGGCACA
GGTTGAACCGTGTACCCCCCTCTTGCTGGGAACCTAGCTCACGCAGGGGCCTCCGTAGACCTTACTATTTTTTCACTACA
CCTTGCCGGTGTTTCATCTATTTTAGGATCAATTAACTTTATTACAACTATTATCAACATAAAACCACCAGCCATCTCAC
AATACCAAACCCCGCTGTTTATTTGAGCCACGCTAGTAACCACAGTTCTGCTTCTACTGTCTCTGCCTGTACTAGCCGCT
GGTATTACCATGCTACTTACAGACCGAAACCTTAACACAACCTTCTTTGACCCTGCAGGAGGTGGGGACCCAATTCTCTA
CCAACACCTA
>8737_4519|Eigenmannia.virescens|COI-5P
TCTATATAGTATTTGGTGCCTGAGCCGGAATAGTCGGCACAGCCCTTAGCCTCCTAATTCGAGCAGAGCTAAGCCAGCCT
GGAGCTCTTCTAGGTGACGACCAAATTTATAACGTAATCGTCACTGCCCACGCCTTCGTAATAATCTTCTTCATGGTTAT
ACCAATTATGATTGGAGGATTTGGGAACTGACTTATCCCCCTAATGATTGGAGCCCCCGACATAGCCTTCCCACGAATAA
ATAACATAAGCTTCTGACTTCTCCCTCCTTCATTCCTGCTTCTTCTTGCCTCCTCCGGAGTAGAGGCTGGAGCCGGCACA
GGCTGAACCGTGTACCCCCCTCTTGCTGGGAACCTAGCTCACGCAGGGGCCTCCGTAGACCTTACTATTTTTTCACTACA
CCTTGCCGGTGTTTCATCTATTTTAGGATCAATTAACTTTATTACAACTATTATCAACATAAAACCACCAGCCATCTCAC
AATACCAAACCCCGCTGTTTATTTGAGCCACGCTAGTAACCACAGTTCTGCTTCTACTGTCTCTGCCTGTACTAGCCGCT
GGTATTACCATGCTACTTACAGACCGAAACCTTAACACAACCTTCTTTGACCCTGCAGGAGGTGGGGACCCAATTCTCTA
CCAACACCTA
>8738_4519|Eigenmannia.virescens|COI-5P
TCTATATAGTATTTGGTGCCTGAGCCGGAATAGTCGGCACAGCCCTTAGCCTCCTAATTCGAGCAGAGCTAAGCCAGCCT
GGAGCTCTTCTAGGTGACGACCAAATTTATAACGTAATCGTCACTGCCCACGCCTTCGTAATAATCTTCTTCATGGTTAT
ACCAATTATGATTGGAGGATTTGGGAACTGACTTATCCCCCTAATGATTGGAGCCCCCGACATAGCCTTCCCACGAATAA
ATAACATAAGCTTCTGACTTCTCCCTCCTTCATTCCTGCTTCTTCTTGCCTCCTCCGGAGTAGAGGCTGGAGCCGGCACA
GGTTGAACCGTGTACCCCCCTCTTGCTGGGAACCTAGCTCACGCAGGGGCCTCCGTAGACCTTACTATTTTTTCACTACA
CCTTGCCGGTGTTTCATCTATTTTAGGATCAATTAACTTTATTACAACTATTATCAACATAAAACCACCAGCCATCTCAC
AATACCAAACCCCGCTGTTTATTTGAGCCACGCTAGTAACCACAGTTCTGCTTCTACTGTCTCTGCCTGTACTAGCCGCT
GGTATTACCATGCTACTTACAGACCGAAACCTTAACACAACCTTCTTTGACCCTGCAGGAGGTGGGGACCCAATTCTCTA
CCAACACCTA
>8778_4563|Eigenmannia.virescens|COI-5P
TCTATATAGTATTTGGTGCCTGAGCCGGAATAGTCGGCACAGCCCTTAGCCTCCTAATTCGAGCAGAGCTAAGCCAGCCT
GGAGCTCTTCTAGGTGACGACCAAATTTATAACGTAATCGTCACTGCCCACGCCTTCGTAATAATCTTCTTCATGGTTAT
ACCAATTATGATTGGAGGATTTGGGAACTGACTTATCCCCCTAATGATTGGAGCCCCCGACATAGCCTTCCCACGAATAA
ATAACATAAGCTTCTGACTTCTCCCTCCTTCATTCCTGCTTCTTCTTGCCTCCTCCGGAGTAGAGGCTGGAGCCGGCACA
GGTTGAACCGTGTACCCCCCTCTTGCTGGGAACCTAGCTCACGCAGGGGCCTCCGTAGACCTTACTATTTTTTCACTACA
CCTTGCCGGTGTTTCATCTATTTTAGGATCAATTAACTTTATTACAACTATTATCAACATAAAACCACCAGCCATCTCAC
AATACCAAACCCCGCTGTTTATTTGAGCCACGCTAGTAACCACAGTTCTGCTTCTACTGTCTCTGCCTGTACTAGCCGCT
GGTATTACCATGCTACTTACAGACCGAAACCTTAACACAACCTTCTTTGACCCTGCAGGAGGTGGGGACCCAATTCTCTA
CCAACACCTATTC
>8652_4497|Sternopygus.aequilabiatus|COI-5P
CCTCTATATAGTATTTGGTGCCTGAGCCGGAATAATTGGCACAGCTCTCAGCCTCCTAATTCGAGCAGAACTCAGCCAAC
CCGGGGCTCTTATGGGCGACGATCAAATTTACAATGTAATTGTAACTGCCCACGCCTTTGTAATAATCTTCTTTATGGTT
ATACCAATCATAATTGGAGGCTTTGGAAATTGACTCATCCCCCTAATAATTGGAGCCCCAGATATAGCATTTCCACGAAT
AAATAACATAAGCTTTTGACTCCTCCCCCCCTCCTTTCTTCTTCTCCTAGCCTCCTCTGGTGTTGAAGCTGGGGTAGGAA
CTGGTTGAACCGTCTACCCCCCTTTAGCTGGCAATCTCGCCCACGCCGGAGCCTCAGTAGACTTAGCTATTTTCTCACTT
CACCTTGCAGGCGTGTCTTCCATCCTAGGGTCAATCAACTTCATCACAACAATTATTAACATAAAACCCCCAGCCATCTC
TCAATACCAAACACCCTTATTTATTTGAGCCCTACTCGTAACAACTGTCCTTCTCCTCCTCTCTTTACCAGTTCTAGCTG
CTGGAATTACCATACTACTTACAGACCGAAACCTCAACACAACATTCTTTGACCCAGCAGGAGGGGGTGACCCAATCCTT
TACCAACACTTATTT
>8735_4518|Sternopygus.aequilabiatus|COI-5P
CCTCTATATAGTATTTGGTGCCTGAGCCGGAATAATTGGCACAGCTCTCAGCCTCCTAATTCGAGCAGAACTCAGCCAAC
CCGGGGCTCTTATGGGCGACGATCAAATTTACAATGTAATTGTAACTGCCCACGCCTTTGTAATAATCTTCTTTATGGTT
ATACCAATCATAATTGGAGGCTTTGGAAATTGACTCATCCCCCTAATAATTGGAGCCCCAGATATAGCATTTCCACGAAT
AAATAACATAAGCTTTTGACTCCTCCCCCCCTCCTTTCTTCTTCTCCTAGCCTCCTCTGGTGTTGAAGCTGGGGTAGGAA
CTGGTTGAACCGTCTACCCCCCTTTAGCTGGCAATCTCGCCCACGCCGGAGCCTCAGTAGACTTAGCTATTTTCTCACTT
CACCTTGCAGGCGTGTCTTCCATCCTAGGGTCAATCAACTTCATCACAACAATTATTAACATAAAACCCCCAGCCATCTC
TCAATACCAAACACCCTTATTTATTTGAGCCCTACTCGTAACAACTGTCCTTCTCCTCCTCTCTTTACCAGTTCTAGCTG
CTGGAATTACCATACTACTTACAGACCGAAACCTCAACACAACATTCTTTGACCCAGCAGGAGGGGGTGACCCAATCCTT
TACCAACACTTATTT
>8783_4565|Sternopygus.aequilabiatus|COI-5P
CCTCTATATAGTATTTGGTGCCTGAGCCGGAATAATTGGCACAGCTCTCAGCCTCCTAATTCGAGCAGAACTCAGCCAAC
CCGGGGCTCTTATGGGCGACGATCAAATTTACAATGTAATTGTAACTGCCCACGCCTTTGTAATAATCTTCTTTATGGTT
ATACCAATCATAATTGGAGGCTTTGGAAATTGACTCATCCCCCTAATAATTGGAGCCCCAGATATAGCATTTCCACGAAT
AAATAACATAAGCTTTTGACTTCTCCCCCCCTCCTTTCTTCTTCTCCTAGCCTCCTCTGGTGTTGAAGCTGGGGTAGGAA
CTGGTTGAACCGTCTACCCCCCTTTAGCTGGCAATCTCGCCCACGCCGGAGCCTCAGTAGACTTAGCTATTTTCTCACTT
CACCTTGCAGGAGTGTCTTCCATCCTAGGGTCAATCAACTTCATCACAACAATTATTAACATAAAACCCCCAGCCATCTC
TCAATACCAAACACCCTTATTTATTTGAGCCCTACTCGTAACAACTGTCCTTCTCCTCCTCTCTTTACCAGTTCTAGCTG
CTGGAATTACCATACTACTTACAGACCGAAACCTCAACACAACATTCTTTGACCCAGCAGGAGGGGGTGACCCAATCCTT
TACCAACACTTATTT
>8809_4644|Sternopygus.aequilabiatus|COI-5P
CCTCTATATAGTATTTGGTGCCTGAGCCGGAATAATTGGCACAGCTCTCAGCCTCCTAATTCGAGCAGAACTCAGCCAAC
CCGGGGCTCTTATGGGCGACGATCAAATTTACAATGTAATTGTAACTGCCCACGCCTTTGTAATAATCTTCTTTATGGTT
ATACCAATCATAATTGGAGGCTTTGGAAATTGACTCATCCCCCTAATAATTGGAGCCCCAGATATAGCATTTCCACGAAT
AAATAACATAAGCTTTTGACTTCTCCCCCCCTCCTTTCTTCTTCTCCTAGCCTCCTCTGGTGTTGAAGCTGGGGTAGGAA
CTGGTTGAACCGTCTACCCCCCTTTAGCTGGCAATCTCGCCCACGCCGGAGCCTCAGTAGACTTAGCTATTTTCTCACTT
CACCTTGCAGGAGTGTCTTCCATCCTAGGGTCAATCAACTTCATCACAACAATTATTAACATAAAACCCCCAGCCATCTC
TCAATACCAAACACCCTTATTTATTTGAGCCCTACTCGTAACAACTGTCCTTCTCCTCCTCTCTTTACCAGTTCTAGCTG
CTGGAATTACCATACTACTTACAGACCGAAACCTCAACACAACATTCTTTGACCCAGCAGGAGGGGGTGACCCAATCCTT
TACCAACACTTATTT
>6412A_6412|Hoplias.malabaricus|COI-5P 
ACATGCCTTCGTGATAATTTTCTTCATAGTAATGCCCATTATGATCGGGGGGTTCGGGAACTGACTTGTTCCCCTCATGA
TCGGAGCACCCGACATAGCCTTCCCACGAATAAATAACATAAGTTTCTGACTTCTTCCCCCCTCATTACTTCTCCTGCTA
GCCTCCTCCGGCGTAGAAGCAGGAGTTGGGACAGGTTGAACTGTCTACCCCCCTCTTGCCGGAAACCTTGCACACGCAGG
GGCCTCCGTCGACCTGGCAATCTTTTCTCTCCATCTTGCAGGAGTCTCCTCAATTTTAGGAGCTATTAATTTTATTACAA
CAATTATTAACATAAAACCCCCTGCCATTTCACAATACCAAACCCCTCTATTTGTTTGAGCCATTTTAATTACGGCCGTC
CTTCTTCTCCTCTCCCTCCCCGTTCTTGCTGCTGGAATTACAATACTTTTAACGGACCGAAACCTTAACACCACCTTCTT
TGACCCTGCAGGGGGAGGAGACCCCATTCTTTATCAACATCT
>6051A_6051|Hoplias.malabaricus|COI-5P
ACATGCCTTCGTGATAATTTTCTTCATAGTAATGCCCATTATGATCGGGGGGTTCGGGAACTGACTTGTTCCCCTCATGA
TCGGAGCACCCGACATAGCCTTCCCACGAATAAATAACATAAGTTTCTGACTTCTTCCCCCCTCATTACTTCTCCTGCTA
GCCTCCTCCGGCGTAGAAGCAGGAGTTGGGACAGGTTGAACTGTCTACCCCCCTCTTGCCGGAAACCTTGCACACGCAGG
GGCCTCCGTCGACCTGGCAATCTTTTCTCTCCATCTTGCAGGAGTCTCCTCAATTTTAGGAGCTATTAATTTTATTACAA
CAATTATTAACATAAAACCCCCTGCCATTTCACAATACCAAACCCCTCTATTTGTTTGAGCCATTTTAATTACGGCCGTC
CTTCTTCTCCTCTCCCTCCCCGTTCTTGCTGCTGGAATTACAATACTTTTAACGGACCGAAACCTTAACACCACCTTCTT
TGACCCTGCAGGGGGAGGAGACCCCATTCTTTATCAACATCT
>6510A_6510|Hoplias.malabaricus|COI-5P
ACATGCCTTCGTGATAATTTTCTTCATAGTAATGCCCATTATGATCGGGGGGTTCGGGAACTGACTTGTTCCCCTCATGA
TCGGAGCACCCGACATAGCCTTCCCACGAATAAATAACATAAGTTTCTGACTTCTTCCCCCCTCATTACTTCTCCTGCTA
GCCTCCTCCGGCGTAGAAGCAGGAGTTGGGACAGGTTGAACTGTCTACCCCCCTCTTGCCGGAAACCTTGCACACGCAGG
GGCCTCCGTCGACCTGGCAATCTTTTCTCTCCATCTTGCAGGAGTCTCCTCAATTTTAGGAGCTATTAATTTTATTACAA
CAATTATTAACATAAAACCCCCTGCCATTTCACAATACCAAACCCCTCTATTTGTTTGAGCCATTTTAATTACGGCCGTC
CTTCTTCTCCTCTCCCTCCCCGTTCTTGCTGCTGGAATTACAATACTTTTAACGGACCGAAACCTTAACACCACCTTCTT
TGACCCTGCAGGGGGAGGAGACCCCATTCTTTATCAACATCT
>6562A_6562|Hoplias.malabaricus|COI-5P
ACATGCCTTCGTGATAATTTTCTTCATAGTAATGCCCATTATGATCGGGGGGTTCGGGAACTGACTTGTTCCCCTCATGA
TCGGAGCACCCGACATAGCCTTCCCACGAATAAATAACATAAGTTTCTGACTTCTTCCCCCCTCATTACTTCTCCTGCTA
GCCTCCTCCGGCGTAGAAGCAGGAGTTGGGACAGGTTGAACTGTCTACCCCCCTCTTGCCGGAAACCTTGCACACGCAGG
GGCCTCCGTCGACCTGGCAATCTTTTCTCTCCATCTTGCAGGAGTCTCCTCAATTTTAGGAGCTATTAATTTTATTACAA
CAATTATTAACATAAAACCCCCTGCCATTTCACAATACCAAACCCCTCTATTTGTTTGAGCCATTTTAATTACGGCCGTC
CTTCTTCTCCTCTCCCTCCCCGTTCTTGCTGCTGGAATTACAATACTTTTAACGGACCGAAACCTTAACACCACCTTCTT
TGACCCTGCAGGGGGAGGAGACCCCATTCTTTATCAACATCT
>6412B_6412|Hoplias.malabaricus|COI-5P
ACATGCCTTCGTGATAATTTTCTTCATAGTAATGCCCATTATGATCGGGGGGTTCGGGAACTGACTTGTTCCCCTCATGA
TCGGAGCACCCGACATAGCCTTCCCACGAATAAATAACATAAGTTTCTGACTTCTTCCCCCCTCATTACTTCTCCTGCTA
GCCTCCTCCGGCGTAGAAGCAGGAGTTGGGACAGGTTGAACTGTCTACCCCCCTCTTGCCGGAAACCTTGCACACGCAGG
GGCCTCCGTCGACCTGGCAATCTTTTCTCTCCATCTTGCAGGAGTCTCCTCAATTTTAGGAGCTATTAATTTTATTACAA
CAATTATTAACATAAAACCCCCTGCCATTTCACAATACCAAACCCCTCTATTTGTTTGAGCCATTTTAATTACGGCCGTC
CTTCTTCTCCTCTCCCTCCCCGTTCTTGCTGCTGGAATTACAATACTTTTAACGGACCGAAACCTTAACACCACCTTCTT
TGACCCTGCAGGGGGAGGAGACCCCATTCTTTATCAACATCT
>5915_5915|Hoplias.malabaricus|COI-5P
ACATGCCTTCGTGATAATTTTCTTCATAGTAATACCCATTATGATCGGGGGGTTCGGGAACTGACTTGTTCCCCTCATGA
TCGGAGCACCCGACATAGCCTTCCCACGAATAAATAACATAAGTTTCTGACTTCTTCCCCCCTCATTACTTCTCCTGCTA
GCCTCCTCCGGCGTAGAAGCAGGAGTTGGAACAGGTTGAACTGTCTACCCCCCTCTTGCCGGAAACCTTGCACACGCAGG
GGCCTCCGTCGACCTGGCAATCTTTTCTCTTCATCTTGCAGGGGTCTCCTCAATTTTAGGAGCTATTAATTTTATCACAA
CAATTATTAACATAAAACCCCCTGCCATTTCACAATACCAAACCCCTCTATTTGTTTGAGCCATTTTAATTACGGCCGTC
CTTCTTCTCCTCTCCCTCCCCGTTCTTGCTGCTGGAATTACAATACTTTTAACGGACCGAAACCTTAACACCACCTTCTT
TGACCCTGCAGGGGGAGGAGACCCCATTCTTTATCAACATCT
>8233_3661|Cyphocharax.magdaleae|COI-5P
ACACGCCTTTGTAATAATTTTCTTTATAGTAATACCAATTATGATTGGAGGCTTCGGAAACTGACTGGTACCTCTAATGA
TTGGAGCCCCTGACATAGCATTCCCTCGAATAAATAACATGAGTTTCTGACTTCTACCCCCCTCATTCCTTCTTCTGCTA
TCCTCTTCTGGTGTCGAAGCCGGGGTGGGTACTGGCTGAACCGTATATCCACCTCTTGCAGGCAACCTCGCCCACGCAGG
TGCTTCCGTAGATTTAGCCATCTTTTCTCTTCATCTGGCAGGGGTATCCTCAATTCTTGGAGCAATTAATTTTATTACAA
CCATTATCAATATAAAACCCCCCGCAATTTCACAGTATCAAACCCCCTTATTTGTTTGGGCCATTCTAATTACAGCTGTC
CTTCTTCTCCTCTCTCTCCCAGTACTAGCTGCTGGTATTACCATGTTATTAACAGACCGAAACATCAACACAACCTTCTT
TGACCCTGCCGGCGGAGGAGACCCGATCTTATATCAACACCT
>8836_4813|Cyphocharax.magdaleae|COI-5P
ACACGCCTTTGTAATAATTTTCTTTATAGTAATACCAATTATGATTGGAGGCTTCGGAAACTGACTGGTACCTCTAATGA
TTGGAGCCCCTGACATAGCATTCCCTCGAATAAATAACATGAGTTTCTGACTTCTACCCCCCTCATTCCTTCTTCTGCTA
TCCTCTTCTGGTGTCGAAGCCGGGGTGGGTACTGGCTGAACCGTATATCCACCTCTTGCAGGCAACCTCGCCCACGCAGG
TGCTTCCGTAGATTTAGCCATCTTTTCTCTTCATCTGGCAGGGGTATCCTCAATTCTTGGAGCAATTAATTTTATTACAA
CCATTATCAATATAAAACCCCCCGCAATTTCACAGTATCAAACCCCCTTATTTGTTTGGGCCATTCTAATTACAGCTGTC
CTTCTTCTCCTCTCTCTCCCAGTACTAGCTGCTGGTATTACCATATTATTAACAGACCGAAACATCAACACAACCTTCTT
TGACCCTGCCGGCGGAGGAGACCCGATCTTATATCAACACCT
>6565D_6565|Cyphocharax.magdalenae|COI-5P
ACACGCCTTTGTAATAATTTTCTTTATAGTAATACCAATTATGATTGGAGGCTTCGGAAACTGACTGGTACCTCTAATGA
TTGGAGCCCCTGACATAGCATTCCCTCGAATAAATAACATGAGTTTCTGACTTCTACCCCCCTCATTCCTTCTTCTGCTA
TCCTCTTCTGGTGTCGAAGCCGGGGTGGGTACTGGCTGAACCGTATATCCACCTCTTGCAGGCAACCTCGCCCACGCAGG
TGCTTCCGTAGATTTAGCCATTTTTTCTCTTCATCTGGCAGGGGTATCCTCAATTCTTGGAGCAATTAATTTTATTACAA
CCATTATCAATATAAAACCCCCCGCAATTTCACAGTATCAAACCCCCTTATTTGTTTGGGCCATTCTAATTACAGCTGTC
CTTCTTCTCCTCTCTCTCCCAGTACTAGCTGCTGGTATTACCATGTTATTAACAGACCGAAACATCAACACAACCTTCTT
TGACCCTGCCGGCGGAGGAGACCCGATCTTATATCAACACCT
>6565A_6565|Cyphocharax.magdalenae|COI-5P
ACACGCCTTTGTAATAATTTTCTTTATAGTAATACCAATTATGATTGGAGGCTTCGGAAACTGACTGGTACCTCTAATGA
TTGGAGCCCCTGACATAGCATTCCCTCGAATAAATAACATGAGTTTCTGACTTCTACCCCCCTCATTCCTTCTTCTGCTA
TCCTCTTCTGGTGTCGAAGCCGGGGTGGGTACTGGCTGAACCGTATATCCACCTCTTGCAGGCAACCTCGCCCACGCAGG
TGCTTCCGTAGATTTAGCCATTTTTTCTCTTCATCTGGCAGGGGTATCCTCAATTCTTGGAGCAATTAATTTTATTACAA
CCATTATCAATATAAAACCCCCCGCAATTTCACAGTATCAAACCCCCTTATTTGTTTGGGCCATTCTAATTACAGCTGTC
CTTCTTCTCCTCTCTCTCCCAGTACTAGCTGCTGGTATTACCATGTTATTAACAGACCGAAACATCAACACAACCTTCTT
TGACCCTGCCGGCGGAGGAGACCCGATCTTATATCAACACCT
>6546C_6546|Eigenmannia.humboldtii|COI-5P
ACACGCCTTTGTAATAATTTTCTTTATAGTAATACCAATTATGATTGGAGGCTTCGGAAACTGACTGGTACCTCTAATGA
TTGGAGCCCCTGACATAGCATTCCCTCGAATAAATAACATGAGTTTCTGACTTCTACCCCCCTCATTCCTTCTTCTGCTA
TCCTCTTCTGGTGTCGAAGCCGGGGTGGGTACTGGCTGAACCGTATATCCACCTCTTGCAGGCAACCTCGCCCACGCAGG
TGCTTCCGTAGATTTAGCCATTTTTTCTCTTCATCTGGCAGGGGTATCCTCAATTCTTGGAGCAATTAATTTTATTACAA
CCATTATCAATATAAAACCCCCCGCAATTTCACAGTATCAAACCCCCTTATTTGTTTGGGCCATTCTAATTACAGCTGTC
CTTCTTCTCCTCTCTCTCCCAGTACTAGCTGCTGGTATTACCATGTTATTAACAGACCGAAACATCAACACAACCTTCTT
TGACCCTGCCGGCGGAGGAGACCCGATCTTATATCAACACCT
>6120A_6120|Cyphocharax.magdalenae|COI-5P
ACACGCCTTTGTAATAATTTTCTTTATAGTAATACCAATTATGATTGGAGGCTTCGGAAACTGACTGGTACCTCTAATGA
TTGGAGCCCCTGACATAGCATTCCCTCGAATAAATAACATGAGTTTCTGACTTCTACCCCCCTCATTCCTTCTTCTGCTA
TCCTCTTCTGGTGTCGAAGCCGGGGTGGGTACTGGCTGAACCGTATATCCACCTCTTGCAGGCAACCTCGCCCACGCAGG
TGCTTCCGTAGATTTAGCCATTTTTTCTCTTCATCTGGCAGGGGTATCCTCAATTCTTGGAGCAATTAATTTTATTACAA
CCATTATCAATATAAAACCCCCCGCAATTTCACAGTATCAAACCCCCTTATTTGTTTGGGCCATTCTAATTACAGCTGTC
CTTCTTCTCCTCTCTCTCCCAGTACTAGCTGCTGGTATTACCATGTTATTAACAGACCGAAACATCAACACAACCTTCTT
TGACCCTGCCGGCGGAGGAGACCCGATCTTATATCAACACCT
>6539A_6539|Cyphocharax.magdalenae|COI-5P
ACACGCCTTTGTAATAATTTTCTTTATAGTAATACCAATTATGATTGGAGGCTTCGGAAACTGACTGGTACCTCTAATGA
TTGGAGCCCCTGACATAGCATTCCCTCGAATAAATAACATGAGTTTCTGACTTCTACCCCCCTCATTCCTTCTTCTGCTA
TCCTCTTCTGGTGTCGAAGCCGGGGTGGGTACTGGCTGAACCGTATATCCACCTCTTGCAGGCAACCTCGCCCACGCAGG
TGCTTCCGTAGATTTAGCCATTTTTTCTCTTCATCTGGCAGGGGTATCCTCAATTCTTGGAGCAATTAATTTTATTACAA
CCATTATCAATATAAAACCCCCCGCAATTTCACAGTATCAAACCCCCTTATTTGTTTGGGCCATTCTAATTACAGCTGTC
CTTCTTCTCCTCTCTCTCCCAGTACTAGCTGCTGGTATTACCATGTTATTAACAGACCGAAACATCAACACAACCTTCTT
TGACCCTGCCGGCGGAGGAGACCCGATCTTATATCAACACCT
>6120C_6120|Cyphocharax.magdalenae|COI-5P
ACACGCCTTTGTAATAATTTTCTTTATAGTAATACCAATTATGATTGGAGGCTTCGGAAACTGACTGGTACCTCTAATGA
TTGGAGCCCCTGACATAGCATTCCCTCGAATAAATAACATGAGTTTCTGACTTCTACCCCCCTCATTCCTTCTTCTGCTA
TCCTCTTCTGGTGTCGAAGCCGGGGTGGGTACTGGCTGAACCGTATATCCACCTCTTGCAGGCAACCTCGCCCACGCAGG
TGCTTCCGTAGATTTAGCCATTTTTTCTCTTCATCTGGCAGGGGTATCCTCAATTCTTGGAGCAATTAATTTTATTACAA
CCATTATCAATATAAAACCCCCCGCAATTTCACAGTATCAAACCCCCTTATTTGTTTGGGCCATTCTAATTACAGCTGTC
CTTCTTCTCCTCTCTCTCCCAGTACTAGCTGCTGGTATTACCATGTTATTAACAGACCGAAACATCAACACAACCTTCTT
TGACCCTGCCGGCGGAGGAGACCCGATCTTATATCAACACCT
>6410_6410|Cyphocharax.magdalenae|COI-5P
ACACGCCTTTGTAATAATTTTCTTTATAGTAATACCAATTATGATTGGAGGCTTCGGAAACTGACTGGTACCTCTAATGA
TTGGAGCCCCTGACATAGCATTCCCTCGAATAAATAACATGAGTTTCTGACTTCTACCCCCCTCATTCCTTCTTCTGCTA
TCCTCTTCTGGTGTCGAAGCCGGGGTGGGTACTGGCTGAACCGTATATCCACCTCTTGCAGGCAACCTCGCCCACGCAGG
TGCTTCCGTAGATTTAGCCATTTTTTCTCTTCATCTGGCAGGGGTATCCTCAATTCTTGGAGCAATTAATTTTATTACAA
CCATTATCAATATAAAACCCCCCGCAATTTCACAGTATCAAACCCCCTTATTTGTTTGGGCCATTCTAATTACAGCTGTC
CTTCTTCTCCTCTCTCTCCCAGTACTAGCTGCTGGTATTACCATGTTATTAACAGACCGAAACATCAACACAACCTTCTT
TGACCCTGCCGGCGGAGGAGACCCGATCTTATATCAACACCT
>6120B_6120|Cyphocharax.magdalenae|COI-5P
ACACGCCTTTGTAATAATTTTCTTTATAGTAATACCAATTATGATTGGAGGCTTCGGAAACTGACTGGTACCTCTAATGA
TTGGAGCCCCTGACATAGCATTCCCTCGAATAAATAACATGAGTTTCTGACTTCTACCCCCCTCATTCCTTCTTCTGCTA
TCCTCTTCTGGTGTCGAAGCCGGGGTGGGTACTGGCTGAACCGTATATCCACCTCTTGCAGGCAACCTCGCCCACGCAGG
TGCTTCCGTAGATTTAGCCATTTTTTCTCTTCATCTGGCAGGGGTATCCTCAATTCTTGGAGCAATTAATTTTATTACAA
CCATTATCAATATAAAACCCCCCGCAATTTCACAGTATCAAACCCCCTTATTTGTTTGGGCCATTCTAATTACAGCTGTC
CTTCTTCTCCTCTCTCTCCCAGTACTAGCTGCTGGTATTACCATGTTATTAACAGACCGAAACATCAACACAACCTTCTT
TGACCCTGCCGGCGGAGGAGACCCGATCTTATATCAACACCT
>6565B_6565|Cyphocharax.magdalenae|COI-5P
ACACGCCTTTGTAATAATTTTCTTTATAGTAATACCAATTATGATTGGAGGCTTCGGAAACTGACTGGTACCTCTAATGA
TTGGAGCCCCTGACATAGCATTCCCTCGAATAAATAACATGAGTTTCTGACTTCTACCCCCCTCATTCCTTCTCCTGCTA
TCCTCTTCTGGTGTTGAAGCCGGGGTGGGTACTGGCTGAACCGTATATCCACCTCTTGCAGGCAACCTCGCCCACGCAGG
TGCTTCCGTAGATTTAGCCATCTTTTCTCTTCATCTGGCAGGGGTATCCTCAATTCTTGGGGCAATTAATTTTATTACAA
CTATTATCAATATAAAACCCCCCGCAATTTCACAGTATCAAACCCCCTTATTTGTTTGGGCCATTCTAATTACAGCTGTC
CTTCTTCTCCTCTCTCTCCCAGTACTAGCTGCTGGTATTACCATGTTATTAACAGACCGAAACATCAACACAACCTTCTT
TGACCCTGCCGGCGGAGGAGACCCGATCTTATATCAACACCT
>7781_4026|Cyphocharax.magdalenae|COI-5P
ACACGCCTTTGTAATAATTTTCTTTATAGTAATACCAATTATGATTGGAGGCTTCGGAAACTGACTGGTACCTCTAATGA
TTGGAGCCCCTGACATAGCATTCCCTCGAATAAATAACATGAGTTTCTGACTTCTACCCCCCTCATTCCTTCTTCTGCTA
TCCTCTTCTGGTGTCGAAGCCGGGGTGGGTACTGGCTGAACCGTATATCCACCTCTTGCAGGCAACCTCGCCCACGCAGG
TGCTTCCGTAGATTTAGCCATCTTTTCTCTTCATCTGGCAGGGGTATCCTCAATTCTTGGAGCAATTAATTTTATTACAA
CCATTATCAATATAAAACCCCCCGCAATTTCACAGTATCAAACCCCCTTATTTGTTTGGGCCATTCTAATTACAGCTGTC
CTTCTTCTCCTCTCTCTCCCAGTACTAGCTGCTGGTATTACCATATTATTAACAGACCGAAACATCAACACAACCTTCTT
TGACCCTGCCGGCGGAGGAGACCCGATCTTATATCAACACCT
>8234_3661|Cyphocharax.magdaleae|COI-5P
ACACGCCTTTGTAATAATTTTCTTTATAGTAATACCAATTATGATTGGAGGCTTCGGAAACTGACTGGTACCTCTAATGA
TTGGAGCCCCTGACATAGCATTCCCTCGAATAAATAACATGAGTTTCTGACTTCTACCCCCCTCATTCCTTCTTCTGCTA
TCCTCTTCTGGTGTCGAAGCCGGGGTGGGTACTGGCTGAACCGTATATCCACCTCTTGCAGGCAACCTCGCCCACGCAGG
TGCTTCCGTAGATTTAGCCATCTTTTCTCTTCATCTGGCAGGGGTATCCTCAATTCTTGGAGCAATTAATTTTATTACAA
CCATTATCAATATAAAACCCCCCGCAATTTCACAGTATCAAACCCCCTTATTTGTTTGGGCCATTCTAATTACAGCTGTC
CTTCTTCTCCTCTCTCTCCCAGTACTAGCTGCTGGTATTACCATATTATTAACAGANNNNNNNNNNNNNNNNNNNNNNNN
NNNNNNNNNNNNNNNNNNNNNNNNNNNNNNNNNNNNNNNNNN
>8232_3661|Cyphocharax.magdalenae|COI-5P
ACACGCCTTTGTAATAATTTTCTTTATAGTAATACCAATTATGATTGGAGGCTTCGGAAACTGACTGGTACCTCTAATGA
TTGGAGCCCCTGACATAGCATTCCCTCGAATAAATAACATGAGTTTCTGACTTCTACCCCCCTCATTCCTTCTTCTGCTA
TCCTCTTCTGGTGTCGAAGCCGGGGTGGGTACTGGCTGAACCGTATATCCACCTCTTGCAGGCAACCTCGCCCACGCAGG
TGCTTCCGTAGATTTAGCCATCTTTTCTCTTCATCTGGCAGGGGTATCCTCAATTCTTGGAGCAATTAATTTTATTACAA
CCATTATCAATATAAAACCCCCCGCAATTTCACAGTATCAAACCCCCTTATTTGTTTGGGCCATTCTAATTACAGCTGTC
CTTCTTCTCCTCTCTCTCCCAGTACTAGCTGCTGGTATTACCATATTATTAACAGACCGAAACATCAACACAACCTTCTT
TGACCCTGCCGGCGGAGGAGACCCGATCTTATATCAACACCT
>8231_3661|Cyphocharax.magdalenae|COI-5P
ACACGCCTTTGTAATAATTTTCTTTATAGTAATACCAATTATGATTGGAGGCTTCGGAAACTGACTGGTACCTCTAATGA
TTGGAGCCCCTGACATAGCATTCCCTCGAATAAATAACATGAGTTTCTGACTTCTACCCCCCTCATTCCTTCTTCTGCTA
TCCTCTTCTGGTGTCGAAGCCGGGGTGGGTACTGGCTGAACCGTATATCCACCTCTTGCAGGCAACCTCGCCCACGCAGG
TGCTTCCGTAGATTTAGCCATCTTTTCTCTTCATCTGGCAGGGGTATCCTCAATTCTTGGAGCAATTAATTTTATTACAA
CCATTATCAATATAAAACCCCCCGCAATTTCACAGTATCAAACCCCCTTATTTGTTTGGGCCATTCTAATTACAGCTGTC
CTTCTTCTCCTCTCTCTCCCAGTACTAGCTGCTGGTATTACCATATTATTAACAGACCGAAACATCAACACAACCTTCTT
TGACCCTGCCGGCGGAGGAGACCCGATCTTATATCAACACCT
>8837_4813|Cyphocharax.magdalenae|COI-5P
ACACGCCTTTGTAATAATTTTCTTTATAGTAATACCAATTATGATTGGAGGCTTCGGAAACTGACTGGTACCTCTAATGA
TTGGAGCCCCTGACATAGCATTCCCTCGAATAAATAACATGAGTTTCTGACTTCTACCCCCCTCATTCCTTCTTCTGCTA
TCCTCTTCTGGTGTCGAAGCCGGGGTGGGTACTGGCTGAACCGTATATCCACCTCTTGCAGGCAACCTCGCCCACGCAGG
TGCTTCCGTAGATTTAGCCATCTTTTCTCTTCATCTGGCAGGGGTATCCTCAATTCTTGGAGCAATTAATTTTATTACAA
CCATTATCAATATAAAACCCCCCGCAATTTCACAGTATCAAACCCCCTTATTTGTTTGGGCCATTCTAATTACAGCTGTC
CTTCTTCTCCTCTCTCTCCCAGTACTAGCTGCTGGTATTACCATATTATTAACAGACCGAAACATCAACACAACCTTCTT
TGACCCTGCCGGCGGAGGAGACCCGATCTTATATCAACACCT
>7455_2012|Curimata.mivartii|COI-5P
ACACGCCTTTGTAATAATTTTCTTTATAGTAATACCAATTATGATTGGAGGTTTCGGGAACTGACTTGTCCCCCTAATAA
TCGGAGCCCCCGATATAGCATTTCCCCGAATAAACAATATGAGCTTCTGACTCCTACCCCCCTCCTTTCTTCTCCTACTT
TCTTCATCAGGGGTTGAAGCTGGAGTAGGCACTGGTTGAACCGTATATCCTCCTCTTGCCGGCAACCTTGCTCACGCAGG
AGCCTCTGTAGATCTAGCCATCTTTTCTCTTCACCTGGCAGGGGTATCCTCTATTCTTGGCGCAATTAATTTTATTACAA
CCATTATTAATATAAAACCCCCCGCAATTTCACAGTATCAAACCCCTCTATTTGTATGAGCTATTCTAATTACGGCCGTC
CTTCTCCTTCTTTCACTACCAGTCCTAGCTGCCGGAATTACCATACTATTAACAGACCGAAATATTAACACTACATTCTT
TGACCCTGCAGGGGGAGGTGACCCAATCCTCTATCAACNNNN
>7779_4024|Curimata.mivartii|COI-5P
ACACGCCTTTGTAATAATTTTCTTTATAGTAATACCAATTATGATTGGAGGTTTCGGGAACTGACTTGTCCCCCTAATAA
TCGGAGCCCCCGATATAGCATTTCCCCGAATAAACAATATGAGCTTCTGACTCCTACCCCCCTCCTTTCTTCTCCTACTT
TCTTCATCAGGGGTTGAAGCTGGAGTAGGCACTGGTTGAACCGTATATCCTCCTCTTGCCGGCAACCTTGCTCACGCAGG
AGCCTCTGTAGATCTAGCCATCTTTTCTCTTCACCTGGCAGGGGTATCCTCTATTCTTGGCGCAATTAATTTTATTACAA
CCATTATTAATATAAAACCCCCCGCAATTTCACAGTATCAAACCCCTCTATTTGTATGAGCTATTCTAATTACGGCCGTC
CTTCTCCTTCTTTCACTACCAGTCCTAGCTGCCGGAATTACCATACTATTAACAGACCGAAATATTAACACTACATTCTT
TGACCCTGCAGGGGGAGGTGACCCAATCCTCTATCAACACCT
>8130_3494|Curimata.mivartii|COI-5P
ACACGCCTTTGTAATAATTTTCTTTATAGTAATACCAATTATGATTGGAGGTTTCGGGAACTGACTTGTCCCCCTAATAA
TCGGAGCCCCCGATATAGCATTTCCCCGAATAAACAATATGAGCTTCTGACTCCTACCCCCCTCCTTTCTTCTCCTACTT
TCTTCATCAGGGGTTGAAGCTGGAGTAGGCACTGGTTGAACCGTATATCCTCCTCTTGCCGGCAACCTTGCTCACGCAGG
AGCCTCTGTAGATCTAGCCATCTTTTCTCTTCACCTGGCAGGGGTATCCTCTATTCTTGGCGCAATTAATTTTATTACAA
CCATTATTAATATAAAACCCCCCGCAATTTCACAGTATCAAACCCCTCTATTTGTATGAGCTATTCTAATTACGGCCGTC
CTTCTCCTTCTTTCACTACCAGTCCTAGCTGCCGGAATTACCATACTATTAACAGACCGAAATATTAACACTACATTCTT
TGACCCTGCAGGGGGAGGTGACCCAATCCTCTATCAACACCT
>8177_3495|Curimata.mivartii|COI-5P
ACACGCCTTTGTAATAATTTTCTTTATAGTAATACCAATTATGATTGGAGGTTTCGGGAACTGACTTGTCCCCCTAATAA
TCGGAGCCCCCGATATAGCATTTCCCCGAATAAACAATATGAGCTTCTGACTCCTACCCCCCTCCTTTCTTCTCCTACTT
TCTTCATCAGGGGTTGAAGCTGGAGTAGGCACTGGTTGAACCGTATATCCTCCTCTTGCCGGCAACCTTGCTCACGCAGG
AGCCTCTGTAGATCTAGCCATCTTTTCTCTTCACCTGGCAGGGGTATCCTCTATTCTTGGCGCAATTAATTTTATTACAA
CCATTATTAATATAAAACCCCCCGCAATTTCACAGTATCAAACCCCTCTATTTGTATGAGCTATTCTAATTACGGCCGTC
CTTCTCCTTCTTTCACTACCAGTCCTAGCTGCCGGAATTACCATACTATTAACAGACCGAAATATTAACACTACATTCTT
TGACCCTGCAGGGGGAGGTGACCCAATCCTCTATCAACACCT
>8191_3495|Curimata.mivartii|COI-5P
ACACGCCTTTGTAATAATTTTCTTTATAGTAATACCAATTATGATTGGAGGTTTCGGGAACTGACTTGTCCCCCTAATAA
TCGGAGCCCCCGATATAGCATTTCCCCGAATAAACAATATGAGCTTCTGACTCCTACCCCCCTCCTTTCTTCTCCTACTT
TCTTCATCAGGGGTTGAAGCTGGAGTAGGCACTGGTTGAACCGTATATCCTCCTCTTGCCGGCAACCTTGCTCACGCAGG
AGCCTCTGTAGATCTAGCCATCTTTTCTCTTCACCTGGCAGGGGTATCCTCTATTCTTGGCGCAATTAATTTTATTACAA
CCATTATTAATATAAAACCCCCCGCAATTTCACAGTATCAAACCCCTCTATTTGTATGAGCTATTCTAATTACGGCCGTC
CTTCTCCTTCTTTCACTACCAGTCCTAGCTGCCGGAATTACCATACTATTAACAGACCGAAATATTAACACTACATTCTT
TGACCCTGCAGGGGGAGGTGACCCAATCCTCTATCAACACCT
>8129_3494|Curimata.mivartii|COI-5P
ACACGCCTTTGTAATAATTTTCTTTATAGTAATACCAATTATGATTGGAGGTTTCGGGAACTGACTTGTCCCCCTAATAA
TCGGAGCCCCCGATATAGCATTTCCCCGAATAAACAATATGAGCTTCTGACTCCTACCCCCCTCCTTTCTTCTCCTACTT
TCTTCATCAGGGGTTGAAGCTGGAGTAGGCACTGGTTGAACCGTATATCCTCCTCTTGCCGGCAACCTTGCTCACGCAGG
AGCCTCTGTAGATCTAGCCATCTTTTCTCTTCACCTGGCAGGGGTATCCTCTATTCTTGGCGCAATTAATTTTATTACAA
CCATTATTAATATAAAACCCCCCGCAATTTCACAATATCAAACCCCTCTATTTGTATGAGCTATTCTAATTACGGCCGTC
CTTCTCCTTCTTTCACTACCAGTCCTAGCTGCCGGAATTACCATACTATTAACAGACCGAAATATTAACACTACATTCTT
TGACCCTGCAGGGGGAGGTGACCCAATCCTCTATCAACACCT
>8134_3494|Curimata.mivartii|COI-5P
ACACGCCTTTGTAATAATTTTCTTTATAGTAATACCAATTATGATTGGAGGTTTCGGGAACTGACTTGTCCCCCTAATAA
TCGGAGCCCCCGATATAGCATTTCCCCGAATAAACAATATGAGCTTCTGACTCCTACCCCCCTCCTTTCTTCTCCTACTT
TCTTCATCAGGGGTTGAAGCTGGAGTAGGCACTGGTTGAACCGTATATCCTCCTCTTGCCGGCAACCTTGCTCACGCAGG
AGCCTCTGTAGATCTAGCCATCTTTTCTCTTCACCTGGCAGGGGTATCCTCTATTCTTGGCGCAATTAATTTTATTACAA
CCATTATTAATATAAAACCCCCCGCAATTTCACAGTATCAAACCCCTCTATTTGTATGAGCTATTCTAATTACGGCCGTC
CTTCTCCTTCTTTCACTACCAGTCCTAGCTGCCGGAATTACCATACTATTAACAGACCGAAATATTAACACTACATTCTT
TGACCCTGCAGGGGGAGGTGACCCAATCCTCTATCAACACCT
>8190_3495|Curimata.mivartii|COI-5P
ACACGCCTTTGTAATAATTTTCTTTATAGTAATACCAATTATGATTGGAGGTTTCGGGAACTGACTTGTCCCCCTAATAA
TCGGAGCCCCCGATATAGCATTTCCCCGAATAAACAATATGAGCTTCTGACTCCTACCCCCCTCCTTTCTTCTCCTACTT
TCTTCATCAGGGGTTGAAGCTGGAGTAGGCACTGGTTGAACCGTATATCCTCCTCTTGCCGGCAACCTTGCTCACGCAGG
AGCCTCTGTAGATCTAGCCATCTTTTCTCTTCACCTGGCAGGGGTATCCTCTATTCTTGGCGCAATTAATTTTATTACAA
CCATTATTAATATAAAACCCCCCGCAATTTCACAGTATCAAACCCCTCTATTTGTATGAGCTATTCTAATTACGGCCGTC
CTTCTCCTTCTTTCACTACCAGTCCTAGCTGCCGGAATTACCATACTATTAACAGACCGAAATATTAACACTACATTCTT
TGACCCTGCAGGGGGAGGTGACCCAATCCTCTATCAACACCT
>8186_3495|Curimata.mivartii|COI-5P
ACACGCCTTTGTAATAATTTTCTTTATAGTAATACCAATTATGATTGGAGGTTTCGGGAACTGACTTGTCCCCCTAATAA
TCGGAGCCCCCGATATAGCATTTCCCCGAATAAACAATATGAGCTTCTGACTCCTACCCCCCTCCTTTCTTCTCCTACTT
TCTTCATCAGGGGTTGAAGCTGGAGTAGGCACTGGTTGAACCGTATATCCTCCTCTTGCCGGCAACCTTGCTCACGCAGG
AGCCTCTGTAGATCTAGCCATCTTTTCTCTTCACCTGGCAGGGGTATCCTCTATTCTTGGCGCAATTAATTTTATTACAA
CCATTATTAATATAAAACCCCCCGCAATTTCACAGTATCAAACCCCTCTATTTGTATGAGCTATTCTAATTACGGCCGTC
CTTCTCCTTCTTTCACTACCAGTCCTAGCTGCCGGAATTACCATACTATTAACAGACCGAAACATTAACACTACATTCTT
TGACCCTGCAGGGGGAGGTGACCCAATCCTCTATCAACACCT
>8144_3494|Curimata.mivartii|COI-5P
ACACGCCTTTGTAATAATTTTCTTTATAGTAATACCAATTATGATTGGAGGTTTCGGGAACTGACTTGTCCCCCTAATAA
TCGGAGCCCCCGATATAGCATTTCCCCGAATAAACAATATGAGCTTCTGACTCCTACCCCCCTCCTTTCTTCTCCTACTT
TCTTCATCAGGGGTTGAAGCTGGAGTAGGCACTGGTTGAACCGTATATCCTCCTCTTGCCGGCAACCTTGCTCACGCAGG
AGCCTCTGTAGATCTAGCCATCTTTTCTCTTCACCTGGCAGGGGTATCCTCTATTCTTGGCGCAATTAATTTTATTACAA
CCATTATTAATATAAAACCCCCCGCAATTTCACAGTATCAAACCCCTCTATTTGTATGAGCTATTCTAATTACGGCCGTC
CTTCTCCTTCTTTCACTACCAGTCCTAGCTGCCGGAATTACCATACTATTAACAGACCGAAATATTAACACTACATTCTT
TGACCCTGCAGGGGGAGGTGACCCAATCCTCTATCAACACCT
>8882_4854|Curimata.mivartii|COI-5P
ACACGCCTTTGTAATAATTTTCTTTATAGTAATACCAATTATGATTGGAGGTTTCGGGAACTGACTTGTCCCCCTAATAA
TCGGAGCCCCCGATATAGCATTTCCCCGAATAAACAATATGAGCTTCTGACTCCTACCCCCCTCCTTTCTTCTCCTACTT
TCTTCATCAGGGGTTGAGGCTGGAGTAGGCACTGGTTGAACCGTATATCCTCCTCTTGCCGGCAACCTTGCTCACGCAGG
AGCCTCTGTAGATCTAGCCATCTTTTCTCTTCACCTGGCAGGGGTATCCTCTATTCTTGGCGCAATTAATTTTATTACAA
CCATTATTAATATAAAACCCCCCGCAATTTCACAGTATCAAACCCCTCTATTTGTATGAGCTATTCTAATTACGGCCGTC
CTTCTCCTTCTTTCACTACCAGTCCTAGCTGCCGGAATTACCATACTATTAACAGACCGAAATATTAACACTACATTCTT
TGACCCTGCAGGGGGAGGTGACCCAATCCTCTATCAACACCT
>8137_3494|Curimata.mivartii|COI-5P
ACACGCCTTTGTAATAATTTTCTTTATAGTAATACCAATTATGATTGGAGGTTTCGGGAACTGACTTGTCCCCCTAATAA
TCGGAGCCCCCGATATAGCATTTCCCCGAATAAACAATATGAGCTTCTGACTCCTACCCCCCTCCTTTCTTCTCCTACTT
TCTTCATCAGGGGTTGAAGCTGGAGTAGGCACTGGTTGAACCGTATATCCTCCTCTTGCCGGCAACCTTGCTCACGCAGG
AGCCTCTGTAGATCTAGCCATCTTTTCTCTTCACCTGGCAGGGGTATCCTCTATTCTTGGCGCAATTAATTTTATTACAA
CCATTATTAATATAAAACCCCCCGCAATTTCACAGTATCAAACCCCTCTATTTGTATGAGCTATTCTAATTACGGCCGTC
CTTCTCCTTCTTTCACTACCAGTCCTAGCTGCCGGAATTACCATACTATTAACAGACCGAAATATTAACACTACATTCTT
TGACCCTGCAGGGGGAGGTGACCCAATCCTCTATCAACACCT
>8132_3494|Curimata.mivartii|COI-5P
ACACGCCTTTGTAATAATTTTCTTTATAGTAATACCAATTATGATTGGAGGTTTCGGGAACTGACTTATCCCCCTAATAA
TCGGAGCCCCCGATATAGCATTTCCCCGAATAAACAATATGAGCTTCTGACTCCTACCCCCCTCCTTTCTTCTCCTACTT
TCTTCATCAGGGGTTGAAGCTGGAGTAGGCACTGGTTGAACCGTATATCCTCCTCTTGCCGGCAACCTTGCTCACGCAGG
AGCCTCTGTAGATCTAGCCATCTTTTCTCTTCACCTGGCAGGGGTATCCTCTATTCTTGGCGCAATTAATTTTATTACAA
CCATTATTAATATAAAACCCCCCGCAATTTCACAGTATCAAACCCCTCTATTTGTATGAGCTATTCTAATTACGGCCGTC
CTTCTCCTTCTTTCACTACCAGTCCTAGCTGCCGGAATTACCATACTATTAACAGACCGAAATATTAACACTACATTCTT
TGACCCTGCAGGGGGAGGTGACCCAATCCTCTATCAACACCT
>8143_3494|Curimata.mivartii|COI-5P
ACACGCCTTTGTAATAATTTTCTTTATAGTAATACCAATTATGATTGGAGGTTTCGGGAACTGACTTGTCCCCCTAATAA
TCGGAGCCCCCGATATAGCATTTCCCCGAATAAACAATATGAGCTTCTGACTCCTACCCCCCTCCTTTCTTCTCCTACTT
TCTTCATCAGGGGTTGAAGCTGGAGTAGGCACTGGTTGAACCGTATATCCTCCTCTTGCCGGCAACCTTGCTCACGCAGG
AGCCTCTGTAGATCTAGCCATCTTTTCTCTTCACCTGGCAGGGGTATCCTCTATTCTTGGCGCAATTAATTTTATTACAA
CCATTATTAATATAAAACCCCCCGCAATTTCACAGTATCAAACCCCTCTATTTGTATGAGCTATTCTAATTACGGCCGTC
CTTCTCCTTCTTTCACTACCAGTCCTAGCTGCCGGAATTACCATACTATTAACAGACCGAAATATTAACACTACATTCTT
TGACCCTGCAGGGGGAGGTGACCCAATCCTCTATCAACACCT
>8148_3494|Curimata.mivartii|COI-5P
ACACGCCTTTGTAATAATTTTCTTTATAGTAATACCAATTATGATTGGAGGTTTCGGGAACTGACTTGTCCCCCTAATAA
TCGGAGCCCCCGATATAGCATTTCCCCGAATAAACAATATGAGCTTCTGACTCCTACCCCCCTCCTTTCTTCTCCTACTT
TCTTCATCAGGGGTTGAAGCTGGAGTAGGCACTGGTTGAACCGTATATCCTCCTCTTGCCGGCAACCTTGCTCACGCAGG
AGCCTCTGTAGATCTAGCCATCTTTTCTCTTCACCTGGCAGGGGTATCCTCTATTCTTGGCGCAATTAATTTTATTACAA
CCATTATTAATATAAAACCCCCCGCAATTTCACAGTATCAAACCCCTCTATTTGTATGAGCTATTCTAATTACGGCCGTC
CTTCTCCTTCTTTCACTACCAGTCCTAGCTGCCGGAATTACCATACTATTAACAGACCGAAATATTAACACTACATTCTT
TGACCCTGCAGGGGGAGGTGACCCAATCCTCTATCAACACCT
>5953_5953|Gilbertolus.alatus|COI-5P
ACATGCTTTCGTGATAATCTTCTTTATAGTAATACCAGTTATAATTGGAGGGTTTGGAAACTGACTCCTACCTCTTATAC
TAGGGGCGCCAGACATGGCTTTCCCCCGAATAAATAATATAAGCTTTTGGCTTCTTCCACCCTCTTTTCTTCTCCTCTTA
GCCTCTTCAGGGGTTGAAGCCGGAGCGGGGACCGGATGAACCGTTTATCCCCCTCTTGCTGGTAACCTTGCCCATGCAGG
GGCTTCTGTAGACCTAACCATTTTTTCACTTCACCTTGCCGGAGTCTCCTCCATTTTAGGTGCTATTAACTTTATCACAA
CAATTATTAATATAAAACCTCCAGCCATCTCTCAGTATCAAACCCCCTTATTTGTATGGGCTGTTTTAATTACAGCTGTT
CTATTACTCCTTTCACTCCCAGTATTAGCTGCAGGAATTACCATGCTTTTAACCGACCGAAACCTAAACACAACCTTCTT
TGACCCAGCCGGGGGAGGGGATCCAATCCTCTATCAACACTT
>5942H_5942|Gilbertolus.alatus|COI-5P
ACATGCTTTCGTGATAATCTTCTTTATAGTAATACCAGTTATAATTGGAGGGTTTGGAAACTGACTCCTACCTCTTATAC
TAGGGGCGCCAGACATGGCTTTCCCCCGAATAAATAATATAAGCTTTTGGCTTCTTCCACCCTCTTTTCTTCTCCTCTTA
GCCTCTTCAGGGGTTGAAGCCGGAGCGGGGACCGGATGAACCGTTTATCCCCCTCTTGCTGGTAACCTTGCCCATGCAGG
GGCTTCTGTAGACCTAACCATTTTTTCACTTCACCTTGCCGGAGTCTCCTCCATTTTAGGTGCTATTAACTTTATCACAA
CAATTATTAATATAAAACCTCCAGCCATCTCTCAGTATCAAACCCCCTTATTTGTATGGGCTGTTTTAATTACAGCTGTT
CTATTACTCCTTTCACTCCCAGTATTAGCTGCAGGAATTACCATGCTTTTAACCGACCGAAACCTAAACACAACCTTCTT
TGACCCAGCCGGGGGAGGGGATCCAATCCTCTATCAACACTT
>5942F_5942|Gilbertolus.alatus|COI-5P
ACATGCTTTCGTGATAATCTTCTTTATAGTAATACCAGTTATAATTGGAGGGTTTGGAAACTGACTCCTACCTCTTATAC
TAGGGGCGCCAGACATGGCTTTCCCCCGAATAAATAATATAAGCTTTTGGCTTCTTCCACCCTCTTTTCTTCTCCTCTTA
GCCTCTTCAGGGGTTGAAGCCGGAGCGGGGACCGGATGAACCGTTTATCCCCCTCTTGCTGGTAACCTTGCCCATGCAGG
GGCTTCTGTAGACCTAACCATTTTTTCACTTCACCTTGCCGGAGTCTCCTCCATTTTAGGTGCTATTAACTTTATCACAA
CAATTATTAATATAAAACCTCCAGCCATCTCTCAGTATCAAACCCCCTTATTTGTATGGGCTGTTTTAATTACAGCTGTT
CTATTACTCCTTTCACTCCCAGTATTAGCTGCAGGAATTACCATGCTTTTAACCGACCGAAACCTAAACACAACCTTCTT
TGACCCAGCCGGGGGAGGGGATCCAATCCTCTATCAACACTT
>5923B_5923|Gilbertolus.alatus|COI-5P
ACATGCTTTCGTGATAATCTTCTTTATAGTAATACCAGTTATAATTGGAGGGTTTGGAAACTGACTCCTACCTCTTATAC
TAGGGGCGCCAGACATGGCTTTCCCCCGAATAAATAATATAAGCTTTTGGCTTCTTCCACCCTCTTTTCTTCTCCTCTTA
GCCTCTTCAGGGGTTGAAGCCGGAGCGGGGACCGGATGAACCGTTTATCCCCCTCTTGCTGGTAACCTTGCCCATGCAGG
GGCTTCTGTAGACCTAACCATTTTTTCACTTCACCTTGCCGGAGTCTCCTCCATTTTAGGTGCTATTAACTTTATCACAA
CAATTATTAATATAAAACCTCCAGCCATCTCTCAGTATCAAACCCCCTTATTTGTATGGGCTGTTTTAATTACAGCTGTT
CTATTACTCCTTTCACTCCCAGTATTAGCTGCAGGAATTACCATGCTTTTAACCGACCGAAACCTAAACACAACCTTCTT
TGACCCA-CCAGGGGAGGGGATCCAATCCTCTATCAACACTT
>5303A_5303|Ichthyoelephas.longirostris|COI-5P
ACATGCCTTCGTAATAATCTTCTTTATAGTAATACCAATCATGATTGGAGGATTCGGAAATTGACTAGTGCCCCTAATGC
TGGGGGCTCCTGATATGGCATTCCCCCGAATGAATAACATGAGCTTCTGACTCCTTCCCCCTTCATTCCTCCTCCTACTA
GCTTCATCCGGGATCGAAGCCGGGGCAGGTACAGGCTGGACTGTTTATCCTCCTCTTGCCGGGAACCTAGCTCACGCAGG
GGCCTCTGTTGATCTAACTATCTTCTCACTTCATCTTGCCGGGGTGTCTTCCATTCTAGGGGCAATTAACTTTATTACAA
CCATTATCAACATGAAACCTCCTGCCATCTCACAGTACCAAACCCCTTTATTTGTGTGATCTGTTCTAATTACAGCTGTA
CTCCTACTTCTCTCTCTACCAGTACTAGCCGCTGGGATTACGATGCTCTTAACTGACCGAAATCTTAACACTACCTTCTT
TGACCCCGCTGGAGGAGGAGACCCGATCCTTTATCAACACTT
>8151_3652|Triportheus.magdalenae|COI-5P
ACATGCATTCGTAATAATTTTCTTTATAGTAATACCAGTTATAATCGGAGGATTTGGAAACTGACTAGTACCTCTAATGA
TTGGAGCACCCGATATGGCCTTTCCTCGGATAAATAACATAAGTTTCTGACTCCTACCCCCATCATTCCTTCTTCTACTA
GCATCCTCAGGGGTTGAAGCAGGAGCAGGAACCGGTTGAACCGTATACCCGCCCCTTGCAGGAAACCTTGCCCACGCAGG
AGCTTCCGTAGACCTAACCATTTTCTCACTCCATCTTGCAGGAGTTTCCTCAATTCTAGGTGCAATTAACTTTATTACAA
CTATTATTAATATAAAACCACCAGCAATTTCACAATACCAAACACCCCTATTTGTTTGAGCCGTACTAATTACGGCTGTT
CTTTTACTACTCTCACTGCCAGTTTTAGCAGCTGGAATTACAATGCTATTAACAGACCGAAACCTAAACACTACTTTTTT
TGACCCTGCAGGAGGAGGAGACCCAATTTTATACCAACACCT
>8194_3652|Triportheus.magdalenae|COI-5P
ACATGCATTCGTAATAATTTTCTTTATAGTAATACCAGTTATAATCGGAGGATTTGGAAACTGACTAGTACCTCTAATGA
TTGGAGCACCCGATATGGCCTTTCCTCGGATAAATAACATAAGTTTCTGACTCCTACCCCCATCATTCCTTCTTCTACTA
GCATCCTCAGGGGTTGAAGCAGGAGCAGGAACCGGTTGAACCGTATACCCGCCCCTTGCAGGAAACCTTGCCCACGCAGG
AGCTTCCGTAGACCTAACCATTTTCTCACTCCATCTTGNNNNNNNNNNNNNNNNNNNNNNNNNNNNNNNNNNNNNNNNNN
NNNNNNNNNNNNNNNNNNNNNNNNNNNNNNNNNNNNNNNNNNNNNNNNNNNNNNNNNNNNNNNNNNNNNNNNNNNNNNNN
NNNNNNNNNNNNNNNNNNNNNNNNNNNNNNNNNNNNNNNNNNNNNNNNNNNNNNNNNNNNNNNNNNNNNNNNNNNNNNNN
NNNNNNNNNNNNNNNNNNNNNNNNNNNNNNNNNNNNNNNNNN
>8155_3652|Triportheus.magdalenae|COI-5P
ACATGCATTCGTAATAATTTTCTTTATAGTAATACCAGTTATAATCGGAGGATTTGGAAACTGACTAGTACCTCTAATGA
TTGGAGCACCCGATATGGCCTTTCCTCGGATAAATAACATAAGTTTCTGACTCCTACCCCCATCATTCCTTCTTCTACTA
GCATCCTCAGGGGTTGAAGCAGGAGCAGGAACCGGTTGAACCGTATACCCGCCCCTTGCAGGAAACCTTGCCCACGCAGG
AGCTTCCGTAGACCTAACCATTTTCTCACTCCATCTTGCAGGANNNNNNNNNNNNNNNNNNNNNNNNNNNNNNNNNNNNN
NNNNNNNNNNNNNNNNNNNNNNNNNNNNNNNNNNNNNNNNNNNNNNNNNNNNNNNNNNNNNNNNNNNNNNNNNNNNNNNN
NNNNNNNNNNNNNNNNNNNNNNNNNNNNNNNNNNNNNNNNNNNNNNNNNNNNNNNNNNNNNNNNNNNNNNNNNNNNNNNN
NNNNNNNNNNNNNNNNNNNNNNNNNNNNNNNNNNNNNNNNNN
>8157_3652|Triportheus.magdalenae|COI-5P
ACATGCATTCGTAATAATTTTCTTTATAGTAATACCAGTTATAATCGGAGGATTTGGAAACTGACTAGTACCTCTAATGA
TTGGAGCACCCGATATGGCCTTTCCTCGGATAAATAACATAAGTTTCTGACTCCTACCCCCATCATTCCTTCTTCTACTA
GCATCCTCAGGGGTTGAAGCAGGAGCAGGAACCGGTTGAACCGTATACCCGCCCCTTGCAGGAAACCTTGCCCACGCAGG
AGCTTCCGTAGACCTAACCATTTTCTCACTCCATCTTGCAGGAGTTTCCTCAATTCTAGGTGCAATTAACTTTATTACAA
CTATTATTAATATAAAACCACCAGCAATTTCACAATACCAAACACCCCTATTTGTTTGAGCCGTACTAATTACGGCTGTT
CTTTTACTACTCTCACTGCCAGTTTTAGCAGCTGGAATTACAATGCTATTAACAGACCGAAACCTAAACACTACTTTTTT
TGACCCTGCAGGAGGAGGAGACCCAATTTTATACCAACACCT
>8150_3652|Triportheus.magdalenae|COI-5P
ACATGCATTCGTAATAATTTTCTTTATAGTAATACCAGTTATAATCGGAGGATTTGGAAACTGACTAGTACCTCTAATGA
TTGGAGCACCCGATATGGCCTTTCCTCGGATAAATAACATAAGTTTCTGACTCCTACCCCCATCATTCCTTCTTCTACTA
GCATCCTCAGGGGTTGAAGCAGGAGCAGGAACCGGTTGAACCGTATACCCGCCCCTTGCAGGAAACCTTGCCCACGCAGG
AGCTTCCGTAGACCTAACCATTTTCTCACTCCATCTTGCAGGAGTTTCCTCAATTCTAGGTGCAATTAACTTTATTACAA
CTATTATTAATATAAAACCACCAGCAATTTCACAATACCAAACACCCCTATTTGTTTGAGCCGTACTAATTACGGCTGTT
CTTTTATTACTCTCACTGCCAGTTTTAGCAGCTGGAATTACAATGCTATTAACAGACCGAAACCTAAACACTACTTTTTT
TGACCCTGCAGGAGGAGGAGACCCAATTTTATACCAACACCT
>8169_3652|Triportheus.magdalenae|COI-5P
ACATGCATTCGTAATAATTTTCTTTATAGTAATACCAGTTATAATCGGAGGATTTGGAAACTGACTAGTACCTCTAATGA
TTGGAGCACCCGATATGGCCTTTCCTCGGATAAATAACATAAGTTTCTGACTCCTACCCCCATCATTCCTTCTTCTACTA
GCATCCTCAGGGGTTGAAGCAGGAGCAGGAACCGGTTGAACCGTATACCCGCCCCTTGCAGGAAACCTTGCCCACGCAGG
AGCTTCCGTAGACCTAACCATTTTCTCACTCCATCTTGCAGGAGTTTCCTCAATTCTAGGTGCAATTAACTTTATTACAA
CTATTATTAATATAAAACCACCAGCAATTTCACAATACCAAACACCCCTATTTGTTTGAGCCGTACTAATTACGGCTGTT
CTTTTACTACTCTCACTGCCAGTTTTAGCAGCTGGAATTACAATGCTATTAACAGACCGAAACCTAAACACTACTTTTTT
TGACCCTGCAGGAGGAGGAGACCCAATTTTATACCAACACCT
>8154_3652|Triportheus.magdalenae|COI-5P
ACATGCATTCGTAATAATTTTCTTTATAGTAATACCAGTTATAATCGGAGGATTTGGAAACTGACTAGTACCTCTAATGA
TTGGAGCACCCGATATGGCCTTTCCTCGGATAAATAACATAAGTTTCTGACTCCTACCCCCATCATTCCTTCTTCTACTA
GCATCCTCAGGGGTTGAAGCAGGAGCAGGAACCGGTTGAACCGTATACCCGCCCCTTGCAGGAAACCTTGCCCACGCAGG
AGCTTCCGTAGACCTAACCATTTTCTCACTCCATCTTGCAGGAGTTTCCTCAATTCTAGGTGCAATTAACTTTATTACAA
CTATTATTAATATAAAACCACCAGCAATTTCACAATACCAAACACCCCTATTTGTTTGAGCCGTACTAATTACGGCTGTT
CTTTTACTACTCTCACTGCCAGTTTTAGCAGCTGGAATTACAATGCTATTAACAGACCGAAACCTAAACACTACTTTTTT
TGACCCTGCAGGAGGAGGAGACCCAATTTTATAC-AACACCT
>8158_3652|Triportheus.magdalenae|COI-5P
ACATGCATTCGTAATAATTTTCTTTATAGTAATACCAGTTATAATCGGAGGATTTGGAAACTGACTAGTACCTCTAATGA
TTGGAGCACCCGATATGGCCTTTCCTCGGATAAATAACATAAGTTTCTGACTCCTACCCCCATCATTCCTTCTTCTACTA
GCATCCTCAGGGGTTGAAGCAGGAGCAGGAACCGGTTGAACCGTATACCCGCCCCTTGCAGGAAACCTTGCCCACGCAGG
AGCTTCCGTAGACCTAACCATTTTCTCACTCCATCTTGCAGGAGTTTCCTCAATTCTAGGTGCAATTAACTTTATTACAA
CTATTATTAATATAAAACCACCAGCAATTTCACAATACCAAACACCCCTATTTGTTTGAGCCGTACTAATTACGGCTGTT
CTTTTACTACTCTCACTGCCAGTTTTAGCAGCTGGAATTACAATGCTATTAACAGACCGAAACCTAAACACTACTTTTTT
TGACCCTGCAGGAGGAGGAGACCCAATTTTATACCAACACCT
>8187_3652|Triportheus.magdalenae|COI-5P
ACATGCATTCGTAATAATTTTCTTTATAGTAATACCAGTTATAATCGGAGGATTTGGAAACTGACTAGTACCTCTAATGA
TTGGAGCACCCGATATGGCCTTTCCTCGGATAAATAACATAAGTTTCTGACTCCTACCCCCATCATTCCTTCTTCTACTA
GCATCCTCAGGGGTTGAAGCAGGAGCAGGAACCGGTTGAACCGTATACCCGCCCCTTGCAGGAAACCTTGCCCACGCAGG
AGCTTCCGTAGACCTAACCATTTTCTCACTCCATCTTGCAGGAGTTTCCTCAATTCTAGGTGCAATTAACTTTATTACAA
CTATTATTAATATAAAACCACCAGCAATTTCACAATACCAAACACCCCTATTTGTTTGAGCCGTACTAATTACGGCTGTT
CTTTTACTACTCTCACTGCCAGTTTTAGCAGCTGGAATTACAATGCTATTAACAGACCGAAACCTAAACACTACTTTTTT
TGACCCTGCAGGAGGAGGAGACCCAATTTTATACCAACACCT
>8153_3652|Triportheus.magdalenae|COI-5P
ACATGCATTCGTAATAATTTTCTTTATAGTAATACCAGTTATAATCGGAGGATTTGGAAACTGACTAGTACCTCTAATGA
TTGGAGCACCCGATATGGCCTTTCCTCGGATAAATAACATAAGTTTCTGACTCCTACCCCCATCATTCCTTCTTCTACTA
GCATCCTCAGGGGTTGAAGCAGGAGCAGGAACCGGTTGAACCGTATACCCGCCCCTTGCAGGAAACCTTGCCCACGCAGG
AGCTTCCGTAGACCTAACCATTTTCTCACTCCATCTTGCAGGAGTTTCCTCAATTCTAGGTGCAATTAACTTTATTACAA
CTATTATTAATATAAAACCACCAGCAATTTCACAATACCAAACACCCCTATTTGTTTGAGCCGTACTAATTACGGCTGTT
CTTTTACTACTCTCACTGCCAGTTTTAGCAGCTGGAATTACAATGCTATTAACAGACCGAAACCTAAACACTACTTTTTT
TGACCCTGCAGGAGGAGGAGACCCAATTTTATACCAACACCT
>6081_6081|Plagioscion.magdalenae|COI-5P
ACATGCTTTCGTTATGATTTTCTTTATAGTAATACCCGTCATGATCGGAGGTTTCGGAAACTGACTCGTGCCTTTAATAA
TCGGGGCCCCTGATATAGCATTCCCACGAATAAACAACATAAGCTTCTGACTTCTCCCACCCTCCTTCCTTCTTCTCCTT
ACATCCTCTGGGGTCGAGGCAGGAGCCGGAACTGGGTGAACAGTCTACCCCCCGCTCGCCGGAAACCTTGCACACGCAGG
CGCTTCAGTCGACCTAGCCATCTTCTCCCTCCACCTCGCAGGTGTCTCATCAATTCTGGGGGCCATCAACTTCATTACAA
CAATTATTAATATAAAACCCCCTGCTATTTCCCAATATCAAACGCCTTTGTTTGTATGAGCTGTTTTAATTACAGCTGTA
CTCCTCCTACTCTCCCTCCCTGTCCTAGCCGCCGGCATCACAATGCTCCTCACAGACCGCAACTTGAACACAACCTTCTT
TGACCCCGCAGGAGGGGGAGATCCTATCCTTTATCAACACCT
>6069_6069|Brycon.rubricauda|COI-5P
ACACGCATTTGTAATAATCTTCTTTATAGTGATACCAGTAATAATCGGAGGCTTTGGCAACTGACTTGTACCCCTAATGA
TTGGGGCCCCAGACATAGCTTTCCCCCGAATAAATAATATGAGTTTTTGACTTCTACCTCCCTCTTTCCTCCTTCTCCTA
GCCTCCTCGGGGGTCGAAGCAGGAGCAGGAACAGGCTGAACTGTATACCCACCCCTCGCAGGAAACCTTGCCCACGCAGG
AGCCTCTGTGGATTTAACTATTTTTTCACTTCATCTCGCCGGAGTTTCTTCAATTCTTGGAGCAATTAACTTTATTACGA
CAATTATCAACATGAAACCCCCAGCCACCTCTCAATACCAAACGCCTCTATTCGTCTGAGCCGTTCTAGTAACAGCCGTC
CTTCTACTTCTCTCACTGCCAGTACTGGCAGCTGGGATTACCATGCTTTTAACAGATCGAAACCTAAACACCACCTTCTT
TGACCCTGCAGGGGGAGGAGACCCTATCCTCTATCAGCACTT
>5641B_5641|Brycon.rubricauda|COI-5P
ACACGCATTTGTAATAATCTTCTTTATAGTGATACCAGTAATAATCGGAGGCTTTGGCAACTGACTTGTACCCCTAATGA
TTGGGGCCCCAGACATAGCTTTCCCCCGAATAAATAATATGAGTTTTTGACTTCTACCTCCCTCTTTCCTCCTTCTCCTA
GCCTCCTCAGGGGTCGAAGCAGGAGCAGGAACAGGCTGAACTGTATACCCGCCCCTCGCAGGAAACCTTGCCCACGCAGG
AGCCTCTGTGGATTTAACTATTTTTTCACTTCATCTCGCCGGAGTTTCTTCAATTCTTGGAGCAATTAACTTTATTACGA
CAATTATCAACATGAAACCCCCAGCCACCTCTCAATACCAAACGCCTCTATTCGTCTGAGCCGTTCTAGTAACAGCCGTC
CTTCTACTTCTCTCACTGCCAGTACTGGCAGCTGGGATTACCATGCTTTTAACAGATCGAAACCTAAACACCACCTTCTT
TGACCCTGCAGGGGGAGGAGACCCTATCCTCTATCAGCACTT
>6442C_6442|Brycon.rubricauda|COI-5P
ACACGCATTTGTAATAATCTTCTTTATAGTGATACCAGTAATAATCGGAGGCTTTGGCAACTGACTTGTACCCCTAATGA
TTGGGGCCCCAGACATAGCTTTCCCCCGAATAAATAATATGAGTTTTTGACTTCTACCTCCCTCTTTCCTCCTTCTCCTA
GCCTCCTCAGGGGTCGAAGCAGGAGCAGGAACAGGCTGAACTGTATACCCACCCCTCGCAGGAAACCTTGCCCACGCAGG
AGCCTCTGTGGATTTAACTATTTTTTCACTTCATCTCGCCGGAGTTTCTTCAATTCTTGGAGCAATTAACTTTATTACGA
CAATTATCAACATGAAACCCCCAGCCACCTCTCAATACCAAACGCCTCTATTCGTCTGAGCCGTTCTAGTAACAGCCGTC
CTTCTACTTCTCTCACTGCCAGTACTGGCAGCTGGGATTACCATGCTTTTAACAGATCGAAACCTAAACACCACCTTCTT
TGACCCTGCAGGGGGAGGAGACCCTATCCTCTATCAGCACTT
>6442A_6442|Brycon.rubricauda|COI-5P
ACACGCATTTGTAATAATCTTCTTTATAGTGATACCAGTAATAATCGGAGGCTTTGGCAACTGACTTGTACCCCTAATGA
TTGGGGCCCCAGACATAGCTTTCCCCCGAATAAATAATATGAGTTTTTGACTTCTACCTCCCTCTTTCCTCCTTCTCCTA
GCCTCCTCAGGGGTCGAAGCAGGAGCAGGAACAGGCTGAACTGTATACCCACCCCTCGCAGGAAACCTTGCCCACGCAGG
AGCCTCTGTGGATTTAACTATTTTTTCACTTCATCTCGCCGGAGTTTCTTCAATTCTTGGAGCAATTAACTTTATTACGA
CAATTATCAACATGAAACCCCCAGCCACCTCTCAATACCAAACGCCTCTATTCGTCTGAGCCGTTCTAGTAACAGCCGTC
CTTCTACTTCTCTCACTGCCAGTACTGGCAGCTGGGATTACCATGCTTTTAACAGATCGAAACCTAAACACCACCTTCTT
TGACCCTGCAGGGGGAGGAGACCCTATCCTCTATCAGCACTT
>5829D_5829|Brycon.rubricauda|COI-5P
ACACGCATTTGTAATAATCTTCTTTATAGTGATACCAGTAATAATCGGAGGCTTTGGCAACTGACTTGTACCCCTAATGA
TTGGGGCCCCAGACATAGCTTTCCCCCGAATAAATAATATGAGTTTTTGACTTCTACCTCCCTCTTTCCTCCTTCTCCTA
GCCTCCTCAGGGGTCGAAGCAGGAGCAGGAACAGGCTGAACTGTATACCCACCCCTCGCAGGAAACCTTGCCCACGCAGG
AGCCTCTGTGGATTTAACTATTTTTTCACTTCATCTCGCCGGAGTTTCTTCAATTCTTGGAGCAATTAACTTTATTACGA
CAATTATCAACATGAAACCCCCAGCCACCTCTCAATACCAAACGCCTCTATTCGTCTGAGCCGTTCTAGTAACAGCCGTC
CTTCTACTTCTCTCACTGCCAGTACTGGCAGCTGGGATTACCATGCTTTTAACAGATCGAAACCTAAACACCACCTTCTT
TGACCCTGCAGGGGGAGGAGACCCTATCCTCTATCAGCACTT
>5829C_5829|Brycon.rubricauda|COI-5P
ACACGCATTTGTAATAATCTTCTTTATAGTGATACCAGTAATAATCGGAGGCTTTGGCAACTGACTTGTACCCCTAATGA
TTGGGGCCCCAGACATAGCTTTCCCCCGAATAAATAATATGAGTTTTTGACTTCTACCTCCCTCTTTCCTCCTTCTCCTA
GCCTCCTCAGGGGTCGAAGCAGGAGCAGGAACAGGCTGAACTGTATACCCACCCCTCGCAGGAAACCTTGCCCACGCAGG
AGCCTCTGTGGATTTAACTATTTTTTCACTTCATCTCGCCGGAGTTTCTTCAATTCTTGGAGCAATTAACTTTATTACGA
CAATTATCAACATGAAACCCCCAGCCACCTCTCAATACCAAACGCCTCTATTCGTCTGAGCCGTTCTAGTAACAGCCGTC
CTTCTACTTCTCTCACTGCCAGTGCTGGCAGCTGGGATTACCATGCTTTTAACAGATCGAAACCTAAACACCACCTTCTT
TGACCCTGCAGGGGGAGGAGACCCTATCCTCTATCAGCACTT
>6249_6249|Brycon.rubricauda|COI-5P
ACACGCATTTGTAATAATCTTCTTTATAGTGATACCAGTAATAATCGGAGGCTTTGGCAACTGACTTGTACACCTAATGA
TTGGGGCCCCAGACATAGCTTTCCCCCGAATAAATAATATGAGTTTTTGACTTCTACCTCCCTCTTTCCTCCTTCTCCTA
GCCTCCTCAGGGGTCGAAGCAGGGGCAGGAACAGGCTGAACTGTATACCCACCCCTCGCAGGAAACCTTGCCCACGCAGG
AGCCTCTGTGGATTTAACTATTTTTTCACTTCATCTCGCCGGAGTTTCTTCAATTCTTGGAGCAATTAACTTTATTACGA
CAATTATCAACATGAAACCCCCAGCCACCTCTCAATACCAAACGCCTCTATTCGTCTGAGCCGTTCTAGTAACAGCCGTC
CTTCTACTTCTCTCACTGCCAGTACTGGCAGCTGGGATTACCATGCTTTTAACAGATCGAAACCTAAACACCACCTTCTT
TGACCCTGCAGGGGGAGGAGACCCTATCCTCTATCAGCACTT
>5829A_5829|Brycon.rubricauda|COI-5P
ACACGCATTTGTAATAATCTTCTTTATAGTGATACCAGTAATAATCGGAGGCTTTGGCAACTGACTTGTACCCCTAATGA
TTGGGGCCCCAGACATAGCTTTCCCCCGAATAAATAATATGAGTTTTTGACTTCTACCTCCCTCTTTCCTCCTTCTCCTA
GCCTCCTCAGGGGTCGAAGCAGGGGCAGGAACAGGCTGAACTGTATACCCACCCCTCGCAGGAAACCTTGCCCACGCAGG
AGCCTCTGTGGATTTAACTATTTTTTCACTTCATCTCGCCGGAGTTTCTTCAATTCTTGGAGCAATTAACTTTATTACGA
CAATTATCAACATGAAACCCCCAGCCACCTCTCAATACCAAACGCCTCTATTCGTCTGAGCCGTTCTAGTAACAGCCGTC
CTTCTACTTCTCTCACTGCCAGTACTGGCAGCTGGGATTACCATGCTTTTAACAGATCGAAACCTAAACACCACCTTCTT
TGACCCTGCAGGGGGAGGAGACCCTATCCTCTATCAGCACTT
>5641A_5641|Brycon.rubricauda|COI-5P
ACACGCATTTGTAATAATCTTCTTTATAGTGATACCAGTAATAATCGGAGGCTTTGGCAACTGACTTGTACCCCTAATGA
TTGGGGCCCCAGACATAGCTTTCCCCCGAATAAATAATATGAGTTTTTGACTTCTACCTCCCTCTTTCCTCCTTCTCCTA
GCCTCCTCAGGGGTCGAAGCAGGAGCAGGAACAGGCTGAACTGTATACCCACCCCTCGCAGGAAACCTTGCCCACGCAGG
AGCCTCTGTGGATTTAACTATTTTTTCACTTCATCTCGCCGGAGTTTCTTCAATTCTTGGAGCAATTAACTTTATTACGA
CAATTATCAACATGAAACCCCCGGCCACCTCTCAATACCAAACGCCTCTATTCGTCTGAGCCGTTTTAGTAACAGCCGTC
CTTCTACTTCTCTCACTGCCAGTACTGGCAGCTGGGATTACCATGCTTTTAACAGATCGAAACCTAAACACCACCTTCTT
TGACCCTGCAGGGGGAGGAGACCCTATCCTCTATCAGCACTT
>5094B_5094|Brycon.henni|COI-5P
ACACGCATTCGTAATAATTTTCTTCATGGTTATACCAGTAATAATTGGAGGTTTTGGAAATTGACTCGTACCCCTAATGA
TCGGGGCCCCAGACATGGCCTTTCCACGAATAAATAATATGAGTTTTTGACTTCTACCCCCATCCTTCCTCCTACTCTTG
GCCTCTTCAGGTGTTGAAGCCGGAGCAGGAACAGGCTGAACTGTATATCCCCCGCTCGCAGGAAACTTAGCTCACGCAGG
GGCCTCCGTAGATTTAACCATCTTCTCCCTACATCTTGCAGGAGTTTCTTCAATTCTAGGAGCAATCAACTTTATTACAA
CAATTATTAACATAAAACCCCCAGCCATCTCCCAATATCAAACACCCTTATTTGTCTGAGCCGTGTTAATTACAGCCGTC
CTCCTACTCCTCTCCCTACCAGTACTAGCAGCCGGAATCACCATGCTTCTAACGGACCGAAATCTTAACACCACCTTCTT
TGACCCCGCANNNNNNNNNNNNNNNNNNNNNNNNNNNNNNNN
>5094A_5094|Brycon.henni|COI-5P
ACACGCATTCGTAATAATTTTCTTCATGGTTATACCAGTAATAATTGGAGGTTTTGGAAATTGACTCGTACCCCTAATGA
TCGGGGCCCCAGACATGGCCTTTCCACGAATAAATAATATGAGTTTTTGACTTCTACCCCCATCCTTCCTCCTACTCTTG
GCCTCTTCAGGTGTTGAAGCCGGAGCAGGAACAGGCTGAACTGTATATCCCCCGCTCGCAGGAAACTTAGCTCACGCAGG
GGCCTCCGTAGATTTAACCATCTTCTCCCTACATCTTGCAGGAGTTTCTTCAATTCTAGGAGCAATCAACTTTATTACAA
CAATTATTAACATAAAACCCCCAGCCATCTCCCAATATCAAACACCCTTATTTGTCTGAGCCGTGTTAATTACAGCCGTC
CTCCTACTCCTCTCCCTACCAGTACTAGCAGCCGGAATCACCATGCTTCTAACGGACCGAAATCTTAACACCACCTTCTT
TGACCCCGCANNNNNNNNNNNNNNNNNNNNNNNNNNNNNNNN
>5099B_5099|Brycon.henni|COI-5P
ACACGCATTCGTAATAATTTTCTTTATGGTTATACCAGTAATAATTGGAGGTTTTGGAAATTGACTCGTACCCCTAATGA
TCGGGGCCCCAGACATAGCCTTTCCACGAATAAATAATATGAGTTTTTGACTTCTACCCCCATCCTTCCTCCTACTCTTG
GCCTCTTCAGGTGTTGAAGCCGGGGCAGGAACAGGCTGAACTGTATACCCCCCGCTCGCAGGAAACTTAGCTCACGCAGG
GGCCTCCGTAGATTTAACCATCTTCTCCCTACATCTTGCAGGAGTTTCTTCAATTCTAGGAGCAATCAACTTTATTACAA
CAATTATTAACATAAAACCCCCAGCCATCTCCCAATATCAAACACCCTTATTTGTCTGAGCCGTGTTAATTACAGCCGTC
CTCCTACTCCTCTCCCTACCAGTATTAGCAGCCGGAATCACCATGCTTCTAACGGACCGAAATCTTAACACCNNNNNNNN
NNNNNNNNNNNNNNNNNNNNNNNNNNNNNNNNNNNNNNNNNN
>9062_5069|Brycon.henni|COI-5P
ACACGCATTCGTAATAATTTTCTTTATGGTTATACCAGTAATAATTGGAGGTTTTGGAAATTGACTCGTACCCCTAATGA
TCGGGGCCCCAGACATAGCCTTTCCACGAATAAATAATATGAGTTTTTGACTTCTACCCCCATCCTTCCTCCTACTCTTG
GCCTCTTCAGGTGTTGAAGCCGGGGCAGGAACAGGCTGAACTGTATACCCCCCGCTCGCAGGAAACTTAGCTCACGCAGG
GGCCTCCGTAGATTTAACCATCTTCTCCCTACATCTTGCAGGAGTTTCTTCAATTCTAGGAGCAATCAACTTTATTACAA
CAATTATTAACATAAAACCCCCAGCCATCTCCCAATATCAAACACCCTTATTTGTCTGAGCCGTGTTAATTACAGCCGTC
CTCCTACTCCTCTCCCTACCAGTACTAGCAGCCGGAATCACCATGCTTCTAACGGACCGAAATCTTAACACCACCTTCTT
TGACCCCGCAGGAGGAGGAGACCCGATCCNNNNNNNNNNNNN
>9072_5076|Brycon.henni|COI-5P
ACACGCATTCGTAATAATTTTCTTTATGGTTATACCAGTAATAATTGGAGGTTTTGGAAATTGACTCGTACCCCTAATGA
TCGGGGCCCCAGACATAGCCTTTCCACGAATAAATAATATGAGTTTTTGACTTCTACCCCCATCCTTCCTCCTACTCTTG
GCCTCTTCAGGTGTTGAAGCCGGGGCAGGAACAGGCTGAACTGTATACCCCCCGCTCGCAGGAAACTTAGCTCACGCAGG
GGCCTCCGTAGATTTAACCATCTTCTCCCTACATCTTGCAGGAGTTTCTTCAATTCTAGGAGCAATCAACTTTATTACAA
CAATTATTAACATAAAACCCCCAGCCATCTCCCAATATCAAACACCCTTATTTGTCTGAGCCGTGTTAATTACAGCCGTC
CTCCTACTCCTCTCCCTACCAGTACTAGCAGCCGGAATCACCATGCTTCTAACGGACCGAAATCTTAACACCACCTTCTT
TGACCCCGCAGGAGGAGGAGACCCGATCCTCTACCAACANNN
>9023_5057|Brycon.henni|COI-5P
ACACGCATTCGTAATAATTTTCTTTATGGTTATACCAGTAATAATTGGAGGTTTTGGAAATTGACTCGTACCCCTAATGA
TCGGGGCCCCAGACATAGCCTTTCCACGAATAAATAATATGAGTTTTTGACTTCTACCCCCATCCTTCCTCCTACTCTTG
GCCTCTTCAGGTGTTGAAGCCGGGGCAGGAACAGGCTGAACTGTATACCCCCCGCTCGCAGGAAACTTAGCTCACGCAGG
GGCCTCCGTAGATTTAACCATCTTCTCCCTACATCTTGCAGGAGTTTCTTCAATTCTAGGAGCAATCAACTTTATTACAA
CAATTATTAACATAAAACCCCCAGCCATCTCCCAATATCAAACACCCTTATTTGTCTGAGCCGTGTTAATTACAGCCGTC
CTCCTACTCCTCTCCCTACCAGTACTAGCAGCCGGAATCACCATGCTTCTAACGGACCGAAATCTTAACACCACCTTCTT
TGACCCCGCAGGAGGAGGAGACCCGATCCTCTACCAACACNN
>5123B_5123|Brycon.henni|COI-5P
ACACGCATTCGTAATAATTTTCTTTATGGTTATACCAGTAATAATTGGAGGTTTTGGAAATTGACTCGTACCCCTAATGA
TCGGGGCCCCAGACATAGCCTTTCCACGAATAAATAATATGAGTTTTTGACTTCTACCCCCATCCTTCCTCCTACTCTTG
GCCTCTTCAGGTGTTGAAGCCGGGGCAGGAACAGGCTGAACTGTATACCCCCCGCTCGCAGGAAACTTAGCTCACGCAGG
GGCCTCCGTAGATTTAACCATCTTCTCCCTACATCTTGCAGGAGTTTCTTCAATTCTAGGAGCAATCAACTTTATTACAA
CAATTATTAACATAAAACCCCCAGCCATCTCCCAATATCAAACACCCTTATTTGTCTGAGCCGTGTTAATTACAGCCGTC
CTCCTACTCCTCTCCCTACCAGTACTAGCAGCCGGAATCACCATGCTTCTAACGGACCGAAATCTTAACACCACCTTCTT
TGACCCCGCAGGAGGAGGAGACCCGATCCTCTACCAACACNN
>9037_5061|Brycon.henni|COI-5P
ACACGCATTCGTAATAATTTTCTTTATGGTTATACCAGTAATAATTGGAGGTTTTGGAAATTGACTCGTACCCCTAATGA
TCGGGGCCCCAGACATAGCCTTTCCACGAATAAATAATATGAGTTTTTGACTTCTACCCCCATCCTTCCTCCTACTCTTG
GCCTCTTCAGGTGTTGAAGCCGGGGCAGGAACAGGCTGAACTGTATACCCCCCGCTCGCAGGAAACTTAGCTCACGCAGG
GGCCTCCGTAGATTTAACCATCTTCTCCCTACATCTTGCAGGAGTTTCTTCAATTCTAGGAGCAATCAACTTTATTACAA
CAATTATTAACATAAAACCCCCAGCCATCTCCCAATATCAAACACCCTTATTTGTCTGAGCCGTGTTAATTACAGCCGTC
CTCCTACTCCTCTCCCTACCAGTACTAGCAGCCGGAATCACCATGCTTCTAACGGACCGAAATCTTAACACCACCTTCTT
TGACCCCGCAGGAGGAGGAGACCCGATCCTCTACCAACACCN
>7547_2531|Brycon.henni|COI-5P
ACACGCATTCGTAATAATTTTCTTTATGGTTATACCAGTAATAATTGGAGGTTTTGGAAATTGACTCGTACCCCTAATGA
TCGGGGCCCCAGACATAGCCTTTCCACGAATAAATAATATGAGTTTTTGACTTCTACCCCCATCCTTCCTCCTACTCTTG
GCCTCTTCAGGTGTTGAAGCCGGGGCAGGAACAGGCTGAACTGTATACCCCCCGCTCGCAGGAAACTTAGCTCACGCAGG
GGCCTCCGTAGATTTAACCATCTTCTCCCTACATCTTGCAGGAGTTTCTTCAATTCTAGGAGCAATCAACTTTATTACAA
CAATTATTAACATAAAACCCCCAGCCATCTCCCAATATCAAACACCCTTATTTGTCTGAGCCGTGTTAATTACAGCCGTC
CTCCTACTCCTCTCCCTACCAGTACTAGCAGCCGGAATCACCATGCTTCTAACGGACCGAAATCTTAACACCACCTTCTT
TGACCCCGCAGGAGGAGGAGACCCGATCCTCTACCAACACNN
>9071_5076|Brycon.henni|COI-5P
ACACGCATTCGTAATAATTTTCTTTATGGTTATACCAGTAATAATTGGAGGTTTTGGAAATTGACTCGTACCCCTAATGA
TCGGGGCCCCAGACATAGCCTTTCCACGAATAAATAATATGAGTTTTTGACTTCTACCCCCATCCTTCCTCCTACTCTTG
GCCTCTTCAGGTGTTGAAGCCGGGGCAGGAACAGGCTGAACTGTATACCCCCCGCTCGCAGGAAACTTAGCTCACGCAGG
GGCCTCCGTAGATTTAACCATCTTCTCCCTACATCTTGCAGGAGTTTCTTCAATTCTAGGAGCAATCAACTTTATTACAA
CAATTATTAACATAAAACCCCCAGCCATCTCCCAATATCAAACACCCTTATTTGTCTGAGCCGTGTTAATTACAGCCGTC
CTCCTACTCCTCTCCCTACCAGTACTAGCAGCCGGAATCACCATGCTTCTAACGGACCGAAATCTTAACACCACCTTCTT
TGACCCCGCAGGAGGAGGAGACCCGATCCTCTACCAACACNN
>9039_5061|Brycon.henni|COI-5P
ACACGCATTCGTAATAATTTTCTTTATGGTTATACCAGTAATAATTGGAGGTTTTGGAAATTGACTCGTACCCCTAATGA
TCGGGGCCCCAGACATAGCCTTTCCACGAATAAATAATATGAGTTTTTGACTTCTACCCCCATCCTTCCTCCTACTCTTG
GCCTCTTCAGGTGTTGAAGCCGGGGCAGGAACAGGCTGAACTGTATACCCCCCGCTCGCAGGAAACTTAGCTCACGCAGG
GGCCTCCGTAGATTTAACCATCTTCTCCCTACATCTTGCAGGAGTTTCTTCAATTCTAGGAGCAATCAACTTTATTACAA
CAATTATTAACATAAAACCCCCAGCCATCTCCCAATATCAAACACCCTTATTTGTCTGAGCCGTGTTAATTACAGCCGTC
CTCCTACTCCTCTCCCTACCAGTACTAGCAGCCGGAATCACCATGCTTCTAACGGACCGAAATCTTAACACCACCTTCTT
TGACCCCGCAGGAGGAGGAGACCCGATCCTCTACCAACACCN
>9024_5057|Brycon.henni|COI-5P
ACACGCATTCGTAATAATTTTCTTTATGGTTATACCAGTAATAATTGGAGGTTTTGGAAATTGACTCGTACCCCTAATGA
TCGGGGCCCCAGACATAGCCTTTCCACGAATAAATAATATGAGTTTTTGACTTCTACCCCCATCCTTCCTCCTACTCTTG
GCCTCTTCAGGTGTTGAAGCCGGGGCAGGAACAGGCTGAACTGTATACCCCCCGCTCGCAGGAAACTTAGCTCACGCAGG
GGCCTCCGTAGATTTAACCATCTTCTCCCTACATCTTGCAGGAGTTTCTTCAATTCTAGGAGCAATCAACTTTATTACAA
CAATTATTAACATAAAACCCCCAGCCATCTCCCAATATCAAACACCCTTATTTGTCTGAGCCGTGTTAATTACAGCCGTC
CTCCTACTCCTCTCCCTACCAGTACTAGCAGCCGGAATCACCATGCTTCTAACGGACCGAAATCTTAACACCACCTTCTT
TGACCCCGCAGGAGGAGGAGACCCGATCCTCTACCAACACCN
>9038_5061|Brycon.henni|COI-5P
ACACGCATTCGTAATAATTTTCTTTATGGTTATACCAGTAATAATTGGAGGTTTTGGAAATTGACTCGTACCCCTAATGA
TCGGGGCCCCAGACATAGCCTTTCCACGAATAAATAATATGAGTTTTTGACTTCTACCCCCATCCTTCCTCCTACTCTTG
GCCTCTTCAGGTGTTGAAGCCGGGGCAGGAACAGGCTGAACTGTATACCCCCCGCTCGCAGGAAACTTAGCTCACGCAGG
GGCCTCCGTAGATTTAACCATCTTCTCCCTACATCTTGCAGGAGTTTCTTCAATTCTAGGAGCAATCAACTTTATTACAA
CAATTATTAACATAAAACCCCCAGCCATCTCCCAATATCAAACACCCTTATTTGTCTGAGCCGTGTTAATTACAGCCGTC
CTCCTACTCCTCTCCCTACCAGTACTAGCAGCCGGAATCACCATGCTTCTAACGGACCGAAATCTTAACACCACCTTCTT
TGACCCCGCAGGAGGAGGAGACCCGATCCTCTACCAACACCN
>5099A_5099|Brycon.henni|COI-5P
ACACGCATTCGTAATAATTTTCTTTATGGTTATACCAGTAATAATTGGAGGTTTTGGAAATTGACTCGTACCCCTAATGA
TCGGGGCCCCAGACATAGCCTTTCCACGAATAAATAATATGAGTTTTTGACTTCTACCCCCATCCTTCCTCCTACTCTTG
GCCTCTTCAGGTGTTGAAGCCGGGGCAGGAACAGGCTGAACTGTATACCCCCCGCTCGCAGGAAACTTAGCTCACGCAGG
GGCCTCCGTAGATTTAACCATCTTCTCCCTACATCTTGCAGGAGTTTCTTCAATTCTAGGAGCAATCAACTTTATTACAA
CAATTATTAACATAAAACCCCCAGCCATCTCCCAATATCAAACACCCTTATTTGTCTGAGCCGTGTTAATTACAGCCGTC
CTCCTACTCCTCTCCCTACCAGTACTAGCAGCCGGAATCACCATGCTTCTAACGGACCGAAATCTTAACACCACCTTCTT
TGACCCCGCAGGAGGAGGAGACCCGATCCTCTACCAACACCT
>5127C_5127|Brycon.henni|COI-5P
ACACGCATTCGTAATAATTTTCTTTATGGTTATACCAGTAATAATTGGAGGTTTTGGAAATTGACTCGTACCCCTAATGA
TCGGGGCCCCAGACATAGCCTTTCCACGAATAAATAATATGAGTTTTTGACTTCTACCCCCATCCTTCCTCCTACTCTTG
GCCTCTTCAGGTGTTGAAGCCGGGGCAGGAACAGGCTGAACTGTATACCCCCCGCTCGCAGGAAACTTAGCTCACGCAGG
GGCCTCCGTAGATTTAACCATCTTCTCCCTACATCTTGCAGGAGTTTCTTCAATTCTAGGAGCAATCAACTTTATTACAA
CAATTATTAACATAAAACCCCCAGCCATCTCCCAATATCAAACACCCTTATTTGTCTGAGCCGTGTTAATTACAGCCGTC
CTCCTACTCCTCTCCCTACCAGTACTAGCAGCCGGAATCACCATGCTTCTAACGGACCGAAATCTTAACACCACCTTCTT
TGACCCCGCAGGAGGAGGAGACCCGATCCTCTACCAACACCT
>9025_5057|Brycon.henni|COI-5P
ACACGCATTCGTAATAATTTTCTTTATGGTTATACCAGTAATAATTGGAGGTTTTGGAAATTGACTCGTACCCCTAATGA
TCGGGGCCCCAGACATAGCCTTTCCACGAATAAATAATATGAGTTTTTGACTTCTACCCCCATCCTTCCTCCTACTCTTG
GCCTCTTCAGGTGTTGAAGCCGGGGCAGGAACAGGCTGAACTGTATACCCCCCGCTCGCAGGAAACTTAGCTCACGCAGG
GGCCTCCGTAGATTTAACCATCTTCTCCCTACATCTTGCAGGAGTTTCTTCAATTCTAGGAGCAATCAACTTTATTACAA
CAATTATTAACATAAAACCCCCAGCCATCTCCCAATATCAAACACCCTTATTTGTCTGAGCCGTGTTAATTACAGCCGTC
CTCCTACTCCTCTCCCTACCAGTACTAGCAGCCGGAATCACCATGCTTCTAACGGACCGAAATCTTAACACCACCTTCTT
TGACCCCGC-GGAGGAGGAGACCCGATCCTCTACCAACACCT
>5094E_5094|Brycon.henni|COI-5P
ACACGCATTCGTAATAATTTTCTTTATGGTTATACCAGTAATAATTGGAGGTTTTGGAAATTGACTCGTACCCCTAATGA
TCGGGGCCCCAGACATAGCCTTTCCACGAATAAATAATATGAGTTTTTGACTTCTACCCCCATCCTTCCTCCTACTCTTG
GCCTCTTCAGGTGTTGAAGCCGGGGCAGGAACAGGCTGAACTGTATACCCCCCGCTCGCAGGAAACTTAGCTCACGCAGG
GGCCTCCGTAGATTTAACCATCTTCTCCCTACATCTTGCAGGAGTTTCTTCAATTCTAGGAGCAATCAACTTTATTACAA
CAATTATTAACATAAAACCCCCAGCCATCTCCCAATATCAAACACCCTTATTTGTCTGAGCCGTGTTAATTACAGCCGTC
CTCCTACTCCTCTCCCTACCAGTACTAGCAGCCGGAATCACCATGCTTCTAACGGACCGAAATCTTAACACCACCTTCTT
TGACCCCGCAGGAGGAGGAGACCCGATCCTCTACCAACACCT
>9041_5061|Brycon.henni|COI-5P
ACACGCATTCGTAATAATTTTCTTTATGGTTATACCAGTAATAATTGGAGGTTTTGGAAATTGACTCGTACCCCTAATGA
TCGGGGCCCCAGACATAGCCTTTCCACGAATAAATAATATGAGTTTTTGACTTCTACCCCCATCCTTCCTCCTACTCTTG
GCCTCTTCAGGTGTTGAAGCCGGGGCAGGAACAGGCTGAACTGTATACCCCCCGCTCGCAGGAAACTTAGCTCACGCAGG
GGCCTCCGTAGATTTAACCATCTTCTCCCTACATCTTGCAGGAGTTTCTTCAATTCTAGGAGCAATCAACTTTATTACAA
CAATTATTAACATAAAACCCCCAGCCATCTCCCAATATCAAACACCCTTATTTGTCTGAGCCGTGTTAATTACAGCCGTC
CTCCTACTCCTCTCCCTACCAGTACTAGCAGCCGGAATCACCATGCTTCTAACGGACCGAAATCTTAACACCACCTTCTT
TGACCCCGCAGGAGGAGGAGACCCGATCCTCTACCAACACCT
>5094C_5094|Brycon.henni|COI-5P
ACACGCATTCGTAATAATTTTCTTTATGGTTATACCAGTAATAATTGGAGGTTTTGGAAATTGACTCGTACCCCTAATGA
TCGGGGCCCCAGACATAGCCTTTCCACGAATAAATAATATGAGTTTTTGACTTCTACCCCCATCCTTCCTCCTACTCTTG
GCCTCTTCAGGTGTTGAAGCCGGGGCAGGAACAGGCTGAACTGTATACCCCCCGCTCGCAGGAAACTTAGCTCACGCAGG
GGCCTCCGTAGATTTAACCATCTTCTCCCTACATCTTGCAGGAGTTTCTTCAATTCTAGGAGCAATCAACTTTATTACAA
CAATTATTAACATAAAACCCCCAGCCATCTCCCAATATCAAACACCCTTATTTGTCTGAGCCGTGTTAATTACAGCCGTC
CTCCTACTCCTCTCCCTACCAGTACTAGCAGCCGGAATCACCATGCTTCTAACGGACCGAAATCTTAACACCACCTTCTT
TGACCCCGCAGGAGGAGGAGACCCGATCCTCTACCAACACCT
>7996_3473|Brycon.henni|COI-5P
ACACGCATTCGTAATAATTTTCTTTATGGTTATACCAGTAATAATTGGAGGTTTTGGAAATTGACTCGTACCCCTAATGA
TCGGGGCCCCAGACATAGCCTTTCCACGAATAAATAATATGAGTTTTTGACTTCTACCCCCATCCTTCCTCCTACTCTTG
GCCTCTTCAGGTGTTGAAGCCGGGGCAGGAACAGGCTGAACTGTATACCCCCCGCTCGCAGGAAACTTAGCTCACGCAGG
GGCCTCCGTAGATTTAACCATCTTCTCCCTACATCTTGCAGGAGTTTCTTCAATTCTAGGAGCAATCAACTTTATTACAA
CAATTATTAACATAAAACCCCCAGCCATCTCCCAATATCAAACACCCTTATTTGTCTGAGCCGTGTTAATTACAGCCGTC
CTCCTACTCCTCTCCCTACCAGTACTAGCAGCCGGAATCACCATGCTTCTAACGGACCGAAATCTTAACACCACCTTCTT
TGACCCCGCAGGAGGAGGAGACCCGATCCTCTACCAACACCT
>9022_5057|Brycon.henni|COI-5P
ACACGCATTCGTAATAATTTTCTTTATGGTTATACCAGTAATAATTGGAGGTTTTGGAAATTGACTCGTACCCCTAATGA
TCGGGGCCCCAGACATAGCCTTTCCACGAATAAATAATATGAGTTTTTGACTTCTACCCCCATCCTTCCTCCTACTCTTG
GCCTCTTCAGGTGTTGAAGCCGGGGCAGGAACAGGCTGAACTGTATACCCCCCGCTCGCAGGAAACTTAGCTCACGCAGG
GGCCTCCGTAGATTTAACCATCTTCTCCCTACATCTTGCAGGAGTTTCTTCAATTCTAGGAGCAATCAACTTTATTACAA
CAATTATTAACATAAAACCCCCAGCCATCTCCCAATATCAAACACCCTTATTTGTCTGAGCCGTGTTAATTACAGCCGTC
CTCCTACTCCTCTCCCTACCAGTACTAGCAGCCGGAATCACCATGCTTCTAACGGACCGAAATCTTAACACCACCTTCTT
TGACCCCGCAGGAGGAGGAGACCCGATCCTCTACCAACACCT
>5123A_5123|Brycon.henni|COI-5P
ACACGCATTCGTAATAATTTTCTTTATGGTTATACCAGTAATAATTGGAGGTTTTGGAAATTGACTCGTACCCCTAATGA
TCGGGGCCCCAGACATAGCCTTTCCACGAATAAATAATATGAGTTTTTGACTTCTACCCCCATCCTTCCTCCTACTCTTG
GCCTCTTCAGGTGTTGAAGCCGGGGCAGGAACAGGCTGAACTGTATACCCCCCGCTCGCAGGAAACTTAGCTCACGCAGG
GGCCTCCGTAGATTTAACCATCTTCTCCCTACATCTTGCAGGAGTTTCTTCAATTCTAGGAGCAATCAACTTTATTACAA
CAATTATTAACATAAAACCCCCAGCCATCTCCCAATATCAAACACCCTTATTTGTCTGAGCCGTGTTAATTACAGCCGTC
CTCCTACTCCTCTCCCTACCAGTACTAGCAGCCGGAATCACCATGCTTCTAACGGACCGAAATCTTAACACCACCTTCTT
TGACCCCGCAGGAGGAGGAGACCCGATCCTCTACCAACACCT
>5123D_5123|Brycon.henni|COI-5P
ACACGCATTCGTAATAATTTTCTTTATGGTTATACCAGTAATAATTGGAGGTTTTGGAAATTGACTCGTACCCCTAATGA
TCGGGGCCCCAGACATAGCCTTTCCACGAATAAATAATATGAGTTTTTGACTTCTACCCCCATCCTTCCTCCTACTCTTG
GCCTCTTCAGGTGTTGAAGCCGGGGCAGGAACAGGCTGAACTGTATACCCCCCGCTCGCAGGAAACTTAGCTCACGCAGG
GGCCTCCGTAGATTTAACCATCTTCTCCCTACATCTTGCAGGAGTTTCTTCAATTCTAGGAGCAATCAACTTTATTACAA
CAATTATTAACATAAAACCCCCAGCCATCTCCCAATATCAAACACCCTTATTTGTCTGAGCCGTGTTAATTACAGCCGTC
CTCCTACTCCTCTCCCTACCAGTACTAGCAGCCGGAATCACCATGCTTCTAACGGACCGAAATCTTAACACCACCTTCTT
TGACCCCGCAGGAGGAGGAGACCCGATCCTCTACCAACACCT
>5123C_5123|Brycon.henni|COI-5P
ACACGCATTCGTAATAATTTTCTTTATGGTTATACCAGTAATAATTGGAGGTTTTGGAAATTGACTCGTACCCCTAATGA
TCGGGGCCCCAGACATAGCCTTTCCACGAATAAATAATATGAGTTTTTGACTTCTACCCCCATCCTTCCTCCTACTCTTG
GCCTCTTCAGGTGTTGAAGCCGGGGCAGGAACAGGCTGAACTGTATACCCCCCGCTCGCAGGAAACTTAGCTCACGCAGG
GGCCTCCGTAGATTTAACCATCTTCTCCCTACATCTTGCAGGAGTTTCTTCAATTCTAGGAGCAATCAACTTTATTACAA
CAATTATTAACATAAAACCCCCAGCCATCTCCCAATATCAAACACCCTTATTTGTCTGAGCCGTGTTAATTACAGCCGTC
CTCCTACTCCTCTCCCTACCAGTACTAGCAGCCGGAATCACCATGCTTCTAACGGACCGAAATCTTAACACCACCTTCTT
TGACCCCGCAGGAGGAGGAGACCCGATCCTCTACCAACACCT
>5104A_5104|Brycon.henni|COI-5P
ACACGCATTCGTAATAATTTTCTTTATGGTTATACCAGTAATAATTGGAGGTTTTGGAAATTGACTCGTACCCCTAATGA
TCGGGGCCCCAGACATAGCCTTTCCACGAATAAATAATATGAGTTTTTGACTTCTACCCCCATCCTTCCTCCTACTCTTG
GCCTCTTCAGGTGTTGAAGCCGGGGCAGGAACAGGCTGAACTGTATACCCCCCGCTCGCAGGAAACTTAGCTCACGCAGG
GGCCTCCGTAGATTTAACCATCTTCTCCCTACATCTTGCAGGAGTTTCTTCAATTCTAGGAGCAATCAACTTTATTACAA
CAATTATTAACATAAAACCCCCAGCCATCTCCCAATATCAAACACCCTTATTTGTCTGAGCCGTGTTAATTACAGCCGTC
CTCCTACTCCTCTCCCTACCAGTACTAGCAGCCGGAATCACCATGCTTCTAACGGACCGAAATCTTAACACCACCTTCTT
TGACCCCGCAGGAGGAGGAGACCCGATCCTCTACCAACACCT
>9012_5054|Brycon.henni|COI-5P
ACACGCATTCGTAATAATTTTCTTTATGGTTATACCAGTAATAATTGGAGGTTTTGGAAATTGACTCGTACCCCTAATGA
TCGGGGCCCCAGACATAGCCTTTCCACGAATAAATAATATGAGTTTTTGACTTCTACCCCCATCCTTCCTCCTACTCTTG
GCCTCTTCAGGTGTTGAAGCCGGGGCAGGAACAGGCTGAACTGTATACCCCCCGCTCGCAGGAAACTTAGCTCACGCAGG
GGCCTCCGTAGATTTAACCATCTTCTCCCTACATCTTGCAGGAGTTTCTTCAATTCTAGGAGCAATCAACTTTATTACAA
CAATTATTAACATAAAACCCCCAGCCATCTCCCAATATCAAACACCCTTATTTGTCTGAGCCGTGTTAATTACAGCCGTC
CTCCTACTCCTCTCCCTACCAGTACTAGCAGCCGGAATCACCATGCTTCTAACGGACCGAAATCTTAACACCACCTTCTT
TGACCCCGCAGGAGGAGGAGACCCGATCCTCTACCAACACCN
>9061_5069|Brycon.henni|COI-5P
ACACGCATTCGTAATAATTTTCTTTATGGTTATACCAGTAATAATTGGAGGTTTTGGAAATTGACTCGTACCCCTAATGA
TCGGGGCCCCAGACATAGCCTTTCCACGAATAAATAATATGAGTTTTTGACTTCTACCCCCATCCTTCCTCCTACTCTTG
GCCTCTTCAGGTGTTGAAGCCGGGGCAGGAACAGGCTGAACTGTATACCCCCCGCTCGCAGGAAACTTAGCTCACGCAGG
GGCCTCCGTAGATTTAACCATCTTCTCCCTACATCTTGCAGGAGTTTCTTCAATTCTAGGAGCAATCAACTTTATTACAA
CAATTATTAACATAAAACCCCCAGCCATCTCCCAATATCAAACACCCTTATTTGTCTGAGCCGTGTTAATTACAGCCGTC
CTCCTACTCCTCTCCCTACCAGTACTAGCAGCCGGAATCACCATGCTTCTAACGGACCGAAATCTTAACACCACCTTCTT
TGACCCCGCAGGAGGAGGAGACCCGATCCTCTACCAACACCT
>5127A_5127|Brycon.henni|COI-5P
ACACGCATTCGTAATAATTTTCTTTATGGTTATACCAGTAATAATTGGAGGTTTTGGAAATTGACTCGTACCCCTAATGA
TCGGGGCCCCAGACATAGCCTTTCCACGAATAAATAATATGAGTTTTTGACTTCTACCCCCATCCTTCCTCCTACTCTTG
GCCTCTTCAGGTGTTGAAGCCGGGGCAGGAACAGGCTGAACTGTATACCCCCCGCTCGCAGGAAACTTAGCTCACGCAGG
GGCCTCCGTAGATTTAACCATCTTCTCCCTACATCTTGCAGGAGTTTCTTCAATTCTAGGAGCAATCAACTTTATTACAA
CAATTATTAACATAAAACCCCCAGCCATCTCCCAATATCAAACACCCTTATTTGTCTGAGCCGTGTTAATTACAGCCGTC
CTCCTACTCCTCTCCCTACCAGTACTAGCAGCCGGAATCACCATGCTTCTAACGGACCGAAATCTTAACACCACCTTCTT
TGACCCCGCAGGAGGAGGAGACCCGATCCTCTACCAACACCT
>5099C_5099|Brycon.henni|COI-5P
ACACGCATTCGTAATAATTTTCTTTATGGTTATACCAGTAATAATTGGAGGTTTTGGAAATTGACTCGTACCCCTAATGA
TCGGGGCCCCAGACATAGCCTTTCCACGAATAAATAATATGAGTTTTTGACTTCTACCCCCATCCTTCCTCCTACTCTTG
GCCTCTTCAGGTGTTGAAGCCGGGGCAGGAACAGGCTGAACTGTATACCCCCCGCTCGCAGGAAACTTAGCTCACGCAGG
GGCCTCCGTAGATTTAACCATCTTCTCCCTACATCTTGCAGGAGTTTCTTCAATTCTAGGAGCAATCAACTTTATTACAA
CAATTATTAACATAAAACCCCCAGCCATCTCCCAATATCAAACACCCTTATTTGTCTGAGCCGTGTTAATTACAGCCGTC
CTCCTACTCCTCTCCCTACCAGTACTAGCAGCCGGAATCACCATGCTTCTAACGGACCGAAATCTTAACACCACCTTCTT
TGACCCCGCAGGAGGAGGAGACCCGATCCTCTACCAACACCT
>5123F_5123|Brycon.henni|COI-5P
ACACGCATTCGTAATAATTTTCTTTATGGTTATACCAGTAATAATTGGAGGTTTTGGAAATTGACTCGTACCCCTAATGA
TCGGGGCCCCAGACATAGCCTTTCCACGAATAAATAATATGAGTTTTTGACTTCTACCCCCATCCTTCCTCCTACTCTTG
GCCTCTTCAGGTGTTGAAGCCGGGGCAGGAACAGGCTGAACTGTATACCCCCCGCTCGCAGGAAACTTAGCTCACGCAGG
GGCCTCCGTAGATTTAACCATCTTCTCCCTACATCTTGCAGGAGTTTCTTCAATTCTAGGAGCAATCAACTTTATTACAA
CAATTATTAACATAAAACCCCCAGCCATCTCCCAATATCAAACACCCTTATTTGTCTGAGCCGTGTTAATTACAGCCGTC
CTCCTACTCCTCTCCCTACCAGTACTAGCAGCCGGAATCACCATGCTTCTAACGGACCGAAATCTTAACACCACCTTCTT
TGACCCCGCAGGAGGAGGAGACCCGATCCTCTACCAACACCT
>9060_5069|Brycon.henni|COI-5P
ACACGCATTCGTAATAATTTTCTTTATGGTTATACCAGTAATAATTGGAGGTTTTGGAAATTGACTCGTACCCCTAATGA
TCGGGGCCCCAGACATAGCCTTTCCACGAATAAATAATATGAGTTTTTGACTTCTACCCCCATCCTTCCTCCTACTCTTG
GCCTCTTCAGGTGTTGAAGCCGGGGCAGGAACAGGCTGAACTGTATACCCCCCGCTCGCAGGAAACTTAGCTCACGCAGG
GGCCTCCGTAGATTTAACCATCTTCTCCCTACATCTTGCAGGAGTTTCTTCAATTCTAGGAGCAATCAACTTTATTACAA
CAATTATTAACATAAAACCCCCAGCCATCTCCCAATATCAAACACCCTTATTTGTCTGAGCCGTGTTAATTACAGCCGTC
CTCCTACTCCTCTCCCTACCAGTACTAGCAGCCGGAATCACCATGCTTCTAACGGACCGAAATCTTAACACCACCTTCTT
TGACCCCGCAGGAGGAGGAGACCCGATCCTCTACCAACACCT
>9040_5061|Brycon.henni|COI-5P
ACACGCATTCGTAATAATTTTCTTTATGGTTATACCAGTAATAATTGGAGGTTTTGGAAATTGACTCGTACCCCTAATGA
TCGGGGCCCCAGACATAGCCTTTCCACGAATAAATAATATGAGTTTTTGACTTCTACCCCCATCCTTCCTCCTACTCTTG
GCCTCTTCAGGTGTTGAAGCCGGGGCAGGAACAGGCTGAACTGTATACCCCCCGCTCGCAGGAAACTTAGCTCACGCAGG
GGCCTCCGTAGATTTAACCATCTTCTCCCTACATCTTGCAGGAGTTTCTTCAATTCTAGGAGCAATCAACTTTATTACAA
CAATTATTAACATAAAACCCCCAGCCATCTCCCAATATCAAACACCCTTATTTGTCTGAGCCGTGTTAATTACAGCCGTC
CTCCTACTCCTCTCCCTACCAGTACTAGCAGCCGGAATCACCATGCTTCTAACGGACCGAAATCTTAACACCACCTTCTT
TGACCCCGCAGGAGGAGGAGACCCGATCCTCTACCAACACCT
>9014_5054|Brycon.henni|COI-5P
ACACGCATTCGTAATAATTTTCTTTATGGTTATACCAGTAATAATTGGAGGTTTTGGAAATTGACTCGTACCCCTAATGA
TCGGGGCCCCAGACATAGCCTTTCCACGAATAAATAATATGAGTTTTTGACTTCTACCCCCATCCTTCCTCCTACTCTTG
GCCTCTTCAGGTGTTGAAGCCGGGGCAGGAACAGGCTGAACTGTATACCCCCCGCTCGCAGGAAACTTAGCTCACGCAGG
GGCCTCCGTAGATTTAACCATCTTCTCCCTACATCTTGCAGGAGTTTCTTCAATTCTAGGAGCAATCAACTTTATTACAA
CAATTATTAACATAAAACCCCCAGCCATCTCCCAATATCAAACACCCTTATTTGTCTGAGCCGTGTTAATTACAGCCGTC
CTCCTACTCCTCTCCCTACCAGTACTAGCAGCCGGAATCACCATGCTTCTAACGGACCGAAATCTTAACACCACCTTCTT
TGACCCCGCAGGAGGAGGAGACCCGATCCTCTACCAACACCT
>9013_5054|Brycon.henni|COI-5P
ACACGCATTCGTAATAATTTTCTTTATGGTTATACCAGTAATAATTGGAGGTTTTGGAAATTGACTCGTACCCCTAATGA
TCGGGGCCCCAGACATAGCCTTTCCACGAATAAATAATATGAGTTTTTGACTTCTACCCCCATCCTTCCTCCTACTCTTG
GCCTCTTCAGGTGTTGAAGCCGGGGCAGGAACAGGCTGAACTGTATACCCCCCGCTCGCAGGAAACTTAGCTCACGCAGG
GGCCTCCGTAGATTTAACCATCTTCTCCCTACATCTTGCAGGAGTTTCTTCAATTCTAGGAGCAATCAACTTTATTACAA
CAATTATTAACATAAAACCCCCAGCCATCTCCCAATATCAAACACCCTTATTTGTCTGAGCCGTGTTAATTACAGCCGTC
CTCCTACTCCTCTCCCTACCAGTACTAGCAGCCGGAATCACCATGCTTCTAACGGACCGAAATCTTAACACCACCTTCTT
TGACCCCGCAGGAGGAGGAGACCCGATCCTCTACCAACACCT
>5125_5125|Brycon.henni|COI-5P
ACACGCATTCGTAATAATTTTCTTTATGGTTATACCAGTAATAATTGGAGGTTTTGGAAATTGACTCGTACCCCTAATGA
TCGGGGCCCCAGACATAGCCTTTCCACGAATAAATAATATGAGTTTTTGACTTCTACCCCCATCCTTCCTCCTACTCTTG
GCCTCTTCAGGTGTTGAAGCCGGGGCAGGAACAGGCTGAACTGTATACCCCCCGCTCGCAGGAAACTTAGCTCACGCAGG
GGCCTCCGTAGATTTAACCATCTTCTCCCTACATCTTGCAGGAGTTTCTTCAATTCTAGGAGCAATCAACTTTATTACAA
CAATTATTAACATAAAACCCCCAGCCATCTCCCAATATCAAACACCCTTATTTGTCTGAGCCGTGTTAATTACAGCCGTC
CTCCTACTCCTCTCCCTACCAGTACTAGCAGCCGGAATCACCATGCTTCTAACGGACCGAAATCTTAACACCACCTTCTT
TGACCCCGCAGGAGGAGGAGACCCGATCCTCTACCAACACCT
>9015_5054|Brycon.henni|COI-5P
ACACGCATTCGTAATAATTTTCTTTATGGTTATACCAGTAATAATTGGAGGTTTTGGAAATTGACTCGTACCCCTAATGA
TCGGGGCCCCAGACATAGCCTTTCCACGAATAAATAATATGAGTTTTTGACTTCTACCCCCATCCTTCCTCCTACTCTTG
GCCTCTTCAGGTGTTGAAGCCGGGGCAGGAACAGGCTGAACTGTATACCCCCCGCTCGCAGGAAACTTAGCTCACGCAGG
GGCCTCCGTAGATTTAACCATCTTCTCCCTACATCTTGCAGGAGTTTCTTCAATTCTAGGAGCAATCAACTTTATTACAA
CAATTATTAACATAAAACCCCCAGCCATCTCCCAATATCAAACACCCTTATTTGTCTGAGCCGTGTTAATTACAGCCGTC
CTCCTACTCCTCTCCCTACCAGTACTAGCAGCCGGAATCACCATGCTTCTAACGGACCGAAATCTTAACACCACCTTCTT
TGACCCCGCAGGAGGAGGAGACCCGATCCTCTACCAACACCT
>5127B_5127|Brycon.henni|COI-5P
ACACGCATTCGTAATAATTTTCTTTATGGTTATACCAGTAATAATTGGAGGTTTTGGAAATTGACTCGTACCCCTAATGA
TCGGGGCCCCAGACATAGCCTTTCCACGAATAAATAATATGAGTTTTTGACTTCTACCCCCATCCTTCCTCCTACTCTTG
GCCTCTTCAGGTGTTGAAGCCGGGGCAGGAACAGGCTGAACTGTATACCCCCCGCTCGCAGGAAACTTAGCTCACGCAGG
GGCCTCCGTAGATTTAACCATCTTCTCCCTACATCTTGCAGGAGTTTCTTCAATTCTAGGAGCAATCAACTTTATTACAA
CAATTATTAACATAAAACCCCCAGCCATCTCCCAATATCAAACACCCTTATTTGTCTGAGCCGTGTTAATTACAGCCGTC
CTCCTACTCCTCTCCCTACCAGTACTAGCAGCCGGAATCACCATGCTTCTAACGGACCGAAATCTTAACACCACCTTCTT
TGACCCCGCAGGAGGAGGAGACCCGATCCTCTACCAACACCT
>5104B_5104|Brycon.henni|COI-5P
ACACGCATTCGTAATAATTTTCTTTATGGTTATACCAGTAATAATTGGAGGTTTTGGAAATTGACTCGTACCCCTAATGA
TCGGGGCCCCAGACATAGCCTTTCCACGAATAAATAATATGAGTTTTTGACTTCTACCCCCATCCTTCCTCCTACTCTTG
GCCTCTTCAGGTGTTGAAGCCGGGGCAGGAACAGGCTGAACTGTATACCCCCCGCTCGCAGGAAACTTAGCTCACGCAGG
GGCCTCCGTAGATTTAACCATCTTCTCCCTACATCTTGCAGGAGTTTCTTCAATTCTAGGAGCAATCAACTTTATTACAA
CAATTATTAACATAAAACCCCCAGCCATCTCCCAATATCAAACACCCTTATTTGTCTGAGCCGTGTTAATTACAGCCGTC
CTCCTACTCCTCTCCCTACCAGTACTAGCAGCCGGAATCACCATGCTTCTAACGGACCGAAATCTTAACACCACCTTCTT
TGACCCCGCAGGAGGAGGAGACCCGATCCTCTACCAACACCT
>5123E_5123|Brycon.henni|COI-5P
ACACGCATTCGTAATAATTTTCTTTATGGTTATACCAGTAATAATTGGAGGTTTTGGAAATTGACTCGTACCCCTAATGA
TCGGGGCCCCAGACATAGCCTTTCCACGAATAAATAATATGAGTTTTTGACTTCTACCCCCATCCTTCCTCCTACTCTTG
GCCTCTTCAGGTGTTGAAGCCGGGGCAGGAACAGGCTGAACTGTATACCCCCCGCTCGCAGGAAACTTAGCTCACGCAGG
GGCCTCCGTAGATTTAACCATCTTCTCCCTACATCTTGCAGGAGTTTCTTCAATTCTAGGAGCAATCAACTTTATTACAA
CAATTATTAACATAAAACCCCCAGCCATCTCCCAATATCAAACACCCTTATTTGTCTGAGCCGTGTTAATTACAGCCGTC
CTCCTACTCCTCTCCCTACCAGTACTAGCAGCCGGAATCACCATGCTTCTAACGGACCGAAATCTTAACACCACCTTCTT
TGACCCCGCAGGAGGAGGAGACCCGATCCTCTACCAACACCT
>5613B_5613|Brycon.henni|COI-5P
ACACGCATTCGTAATAATTTTCTTCATGGTTATACCAGTAATAATTGGAGGTTTTGGAAATTGACTCGTACCCCTAATGA
TCGGGGCCCCAGACATGGCCTTTCCACGAATAAATAATATGAGTTTTTGACTTCTACCCCCATCCTTCCTCCTACTCTTG
GCCTCTTCAGGTGTTGAAGCCGGAGCAGGAACAGGCTGAACTGTATATCCCCCGCTCGCAGGAAACTTAGCTCACGCAGG
GGCCTCCGTAGATTTAACCATCTTCTCCCTACATCTTGCAGGAGTTTCTTCAATTCTAGGAGCAATCAACTTTATTACAA
CAATTATTAACATAAAACCCCCAGCCATCTCCCAATATCAAACACCCTTATTTGTCTGAGCCGTGTTAATTACAGCCGTC
CTCCTACTCCTCTCCCTACCAGTACTAGCAGCCGGAATCACCATGCTTCTAACGGACCGAAATCTTAACACCACCTTCTT
TGACCCCGCAGGAGGAGGAGACCCAATCCTCTACCAACACCT
>5636A_5636|Brycon.henni|COI-5P
ACACGCATTCGTAATAATTTTCTTCATGGTTATACCAGTAATAATTGGAGGTTTTGGAAATTGACTCGTACCCCTAATGA
TCGGGGCCCCAGACATGGCCTTTCCACGAATAAATAATATGAGTTTTTGACTTCTACCCCCATCCTTCCTCCTACTCTTG
GCCTCTTCAGGTGTTGAAGCCGGAGCAGGAACAGGCTGAACTGTATATCCCCCGCTCGCAGGAAACTTAGCTCACGCAGG
GGCCTCCGTAGATTTAACCATCTTCTCCCTACATCTTGCAGGAGTTTCTTCAATTCTAGGAGCAATCAACTTTATTACAA
CAATTATTAACATAAAACCCCCAGCCATCTCCCAATATCAAACACCCTTATTTGTCTGAGCCGTGTTAATTACAGCCGTC
CTCCTACTCCTCTCCCTACCAGTACTAGCAGCCGGAATCACCATGCTTCTAACGGACCGAAATCTTAACACCACCTTCTT
TGACCCCGCAGGAGGAGGAGACCCAATCCTCTACCAACACCT
>5636B_5636|Brycon.henni|COI-5P
ACACGCATTCGTAATAATTTTCTTCATGGTTATACCAGTAATAATTGGAGGTTTTGGAAATTGACTCGTACCCCTAATGA
TCGGGGCCCCAGACATGGCCTTTCCACGAATAAATAATATGAGTTTTTGACTTCTACCCCCATCCTTCCTCCTACTCTTG
GCCTCTTCAGGTGTTGAAGCCGGAGCAGGAACAGGCTGAACTGTATATCCCCCGCTCGCAGGAAACTTAGCTCACGCAGG
GGCCTCCGTAGATTTAACCATCTTCTCCCTACATCTTGCAGGAGTTTCTTCAATTCTAGGAGCAATCAACTTTATTACAA
CAATTATTAACATAAAACCCCCAGCCATCTCCCAATATCAAACACCCTTATTTGTCTGAGCCGTGTTAATTACAGCCGTC
CTCCTACTCCTCTCCCTACCAGTACTAGCAGCCGGAATCACCATGCTTCTAACGGACCGAAATCTTAACACCACCTTCTT
TGACCCCGCAGGAGGAGGAGACCCAATCCTCTACCAACACCT
>8511_3890|Brycon.henni|COI-5P
ACACGCATTCGTAATAATTTTCTTCATGGTTATACCAGTAATAATTGGAGGTTTTGGAAATTGACTCGTACCCCTAATGA
TCGGGGCCCCAGACATGGCCTTTCCACGAATAAATAATATGAGTTTTTGACTTCTACCCCCATCCTTCCTCCTACTCTTG
GCCTCTTCAGGTGTTGAAGCCGGAGCAGGAACAGGCTGAACTGTATATCCCCCGCTCGCAGGAAACTTAGCTCACGCAGG
GGCCTCCGTAGATTTAACCATCTTCTCCCTACATCTTGCAGGAGTTTCTTCAATTCTAGGAGCAATCAACTTTATTACAA
CAATTATTAACATAAAACCCCCAGCCATCTCCCAATATCAAACACCCTTATTTGTCTGAGCCGTGTTAATTACAGCCGTC
CTCCTACTCCTCTCCCTACCAGTACTAGCAGCCGGAATCACCATGCTTCTAACGGACCGAAATCTTAACACCACCTTCTT
TGACCCCGCAGGAGGAGGAGACCCAATCCTCTACCAACACCT
>8512_3890|Brycon.henni|COI-5P
ACACGCATTCGTAATAATTTTCTTCATGGTTATACCAGTAATAATTGGAGGTTTTGGAAATTGACTCGTACCCCTAATGA
TCGGGGCCCCAGACATGGCCTTTCCACGAATAAATAATATGAGTTTTTGACTTCTACCCCCATCCTTCCTCCTACTCTTG
GCCTCTTCAGGTGTTGAAGCCGGAGCAGGAACAGGCTGAACTGTATATCCCCCGCTCGCAGGAAACTTAGCTCACGCAGG
GGCCTCCGTAGATTTAACCATCTTCTCCCTACATCTTGCAGGAGTTTCTTCAATTCTAGGAGCAATCAACTTTATTACAA
CAATTATTAACATAAAACCCCCAGCCATCTCCCAATATCAAACACCCTTATTTGTCTGAGCCGTGTTAATTACAGCCGTC
CTCCTACTCCTCTCCCTACCAGTACTAGCAGCCGGAATCACCATGCTTCTAACGGACCGAAATCTTAACACCACCTTCTT
TGACCCCGCAGGAGGAGGAGACCCAATCCTCTACCAACACCT
>9069_5074|Brycon.henni|COI-5P
ACACGCATTCGTAATAATTTTCTTCATGGTTATACCAGTAATAATTGGAGGTTTTGGAAATTGACTCGTACCCCTAATGA
TCGGGGCCCCAGACATGGCCTTTCCACGAATAAATAATATGAGTTTTTGACTTCTACCCCCATCCTTCCTCCTACTCTTG
GCCTCTTCAGGTGTTGAAGCCGGAGCAGGAACAGGCTGAACTGTATATCCCCCGCTCGCAGGAAACTTAGCTCACGCAGG
GGCCTCCGTAGATTTAACCATCTTCTCCCTACATCTTGCAGGAGTTTCTTCAATTCTAGGAGCAATCAACTTTATTACAA
CAATTATTAACATAAAACCCCCAGCCATCTCCCAATATCAAACACCCTTATTTGTCTGAGCCGTGTTAATTACAGCCGTC
CTCCTACTCCTCTCCCTACCAGTACTAGCAGCCGGAATCACCATGCTTCTAACGGACCGAAACCTTAACACCACCTTCTT
TGACCCCGCAGGAGGAGGAGACCCAATCCTCTACCAACACCN
>5342A_5342|Brycon.moorei|COI-5P
ACATGCATTCGTAATAATTTTCTTCATGGTCATACCAGTAATAATTGGGGGATTCGGTAACTGACTCGTACCCCTAATAA
TTGGAGCCCCTGACATAGCCTTCCCCCGAATAAACAACATGAGTTTTTGACTTTTGCCCCCATCTTTCCTACTTCTTTTA
GCCTCATCTGGAGTTGAAGCGGGGGCGGGAACAGGTTGAACTGTGTACCCCCCTCTCGCAGGAAATATCGCCCACGCAGG
GGCCTCTGTAGACTTAACCATTTTCTCACTCCATCTTGCCGGGGTGTCTTCAATTCTCGGGGCAATCAACTTTATTACAA
CAATCATCAACATGAAACCCCCAGCCATCTCTCAATACCAAACACCTCTATTTGTTTGAGCTGTTTTAGTAACAGCCGTC
CTGCTACTTCTATCTCTGCCTGTGTTAGCAGCTGGAATTACCATGCTTTTAACAGACCGAAATTTAAATACCACCTTCTT
CGACCCTGCGGGAGGAGGAGACCCAATTTTATATCAACACTT
>5342B_5342|Brycon.moorei|COI-5P
ACATGCATTCGTAATAATTTTCTTCATGGTCATACCAGTAATAATTGGGGGATTCGGTAACTGACTCGTACCCCTAATAA
TTGGAGCCCCTGACATAGCCTTCCCCCGAATAAACAACATGAGTTTTTGACTTTTGCCCCCATCTTTCCTACTTCTTTTA
GCCTCATCTGGAGTTGAAGCGGGGGCGGGAACAGGTTGAACTGTGTACCCCCCTCTCGCAGGAAATATCGCCCACGCAGG
GGCCTCTGTAGACTTAACCATTTTCTCACTCCATCTTGCCGGGGTGTCTTCAATTCTCGGGGCAATCAACTTTATTACAA
CAATCATCAACATGAAACCCCCAGCCATCTCTCAATACCAAACACCTCTATTTGTTTGAGCTGTTTTAGTAACAGCCGTC
CTGCTACTTCTATCTCTGCCTGTGTTAGCAGCTGGAATTACCATGCTTTTAACAGACCGAAATTTAAATACCACCTTCTT
CGACCCTGCGGGAGGAGGAGACCCAATTTTATATCAACACTT
>8393_3955|Hemibrycon.caucanus|COI-5P
ACATGCATTTGTGATAATCTTCTTTATAGTAATACCAGNAATAATCGGTGGCTTCGGAAACTGACTTGTTCCTCTGATGA
TCGGTGCCCCCGATATGGCCTTTCCCCGTATGAATAACATAAGTTTCTGACTTTTACCCCCATCTTTCCTTCTCCTACTA
GCCTCATCTGGGGTTGAAGCCGGAGCAGGGACAGGTTGAACTGTTTATCCACCGCTCGCCGGAAACCTAGCACATGCAGG
GGCTTCCGTAGACCTAACTATTTTTTCACTCCACCTTGCCGGGGTATCTTCCATTTTAGGGGCGATCAACTTTATTACCA
CTATTATTAACATAAAACCACCAGCTATTTCACAATATCAAACGCCCCTATTTGTGTGAGCTGTTCTAATTACAGCTGTT
CTTCTTCTCCTATCACTCCCTGTGCTAGCAGCCGGAATTACAATACTCCTAACAGACCGAAATCTTAATACCTCATTCTT
TGATCCTGCAGGAGGGGGAGACCCAATCCTTTATCAACATNN
>8504_3908|Hemibrycon.caucanus|COI-5P
ACATGCATTTGTGATAATCTTCTTTATAGTAATACCAGTAATAATCGGNGGCTTCGGAAACTGACTTGTTCCTCTGATGA
TCGGTGCCCCCGATATGGCCTTTCCCCGTATGAATAACATAAGTTTCTGACTTTTACCCCCATCTTTCCTTCTCCTACTA
GCCTCATCTGGGGTTGAAGCCGGAGCAGGGACAGGTTGAACTGTCTATCCACCGCTCGCCGGAAACCTAGCACATGCAGG
GGCTTCCGTAGACCTAACTATTTTTTCACTCCACCTTGCCGGGGTATCTTCCATTTTAGGGGCGATCAACTTTATTACCA
CTATTATTAACATAAAACCACCAGCTATTTCACAATATCAAACGCCCCTATTTGTGTGAGCTGTTCTAATTACAGCTGTC
CTTCTTCTCCTATCACTCCCTGTGCTAGCAGCCGGAATTACAATACTCCTAACAGACCGAAATCTTAATACCTCATTCTT
TGATCCTGCAGGAGGGGGAGACCCAATCCTTTATCAACNNNN
>5455B_5455|Bryconamericus.caldasi|COI-5P
ACATGCATTTGTGATAATCTTCTTTATAGTAATACCAGTAATAATCGGTGGCTTCGGAAACTGACTTGTTCCTCTGATGA
TCGGTGCCCCCGATATGGCCTTTCCCCGTATGAATAACATAAGTTTCTGACTTTTACCCCCATCTTTCCTTCTCCTACTA
GCCTCATCTGGGGTTGAAGCCGGAGCAGGGACAGGTTGAACTGTTTATCCACCGCTCGCCGGAAACCTAGCACATGCAGG
GGCTTCCGTAGACCTAACTATTTTTTCACTCCACCTTGCCGGGGTATCTTCCATTTTAGGGGCGATCAACTTTATTACCA
CTATTATTAACATAAAACCACCAGCTATTTCACAATATCAAACGCCCCTATTTGTGTGAGCTGTTCTAATTACAGCTGTT
CTTCTTCTCCTATCACTCCCTGTGCTAGCAGCCGGAATTACAATACTCCTAACAGACCGAAATCTTAATACCTCATTCTT
TGATCCTGCAGGAGGGGGAGACCCAATCCTTTATCAACATCT
>5467A_5467|Bryconamericus.caldasi|COI-5P
ACATGCATTTGTGATAATCTTCTTTATAGTAATACCAGTAATAATCGGTGGCTTCGGAAACTGACTTGTTCCTCTGATGA
TCGGTGCCCCCGATATGGCCTTTCCCCGTATGAATAACATAAGTTTCTGACTTTTACCCCCATCTTTCCTTCTCCTACTA
GCCTCATCTGGGGTTGAAGCCGGAGCAGGGACAGGTTGAACTGTTTATCCACCGCTCGCCGGAAACCTAGCACATGCAGG
GGCTTCCGTAGACCTAACTATTTTTTCACTCCACCTTGCCGGGGTATCTTCCATTTTAGGGGCGATCAACTTTATTACCA
CTATTATTAACATAAAACCACCAGCTATTTCACAATATCAAACGCCCCTATTTGTGTGAGCTGTTCTAATTACAGCTGTT
CTTCTTCTCCTATCACTCCCTGTGCTAGCAGCCGGAATTACAATACTCCTAACAGACCGAAATCTTAATACCTCATTCTT
TGATCCTGCAGGAGGGGGAGACCCAATCCTTTATCAACATCT
>5455A_5455|Bryconamericus.caldasi|COI-5P
ACATGCATTTGTGATAATCTTCTTTATAGTAATACCAGTAATAATCGGTGGCTTCGGAAACTGACTTGTTCCTCTGATGA
TCGGTGCCCCCGATATGGCCTTTCCCCGTATGAATAACATAAGTTTCTGACTTTTACCCCCATCTTTCCTTCTCCTACTA
GCCTCATCTGGGGTTGAAGCCGGAGCAGGGACAGGTTGAACTGTTTATCCACCGCTCGCCGGAAACCTAGCACATGCAGG
GGCTTCCGTAGACCTAACTATTTTTTCACTCCACCTTGCCGGAGTATCTTCCATTTTAGGGGCGATCAACTTTATTACCA
CTATTATTAACATAAAACCACCAGCTATTTCACAATATCAAACGCCCCTATTTGTGTGAGCTGTTCTAATTACAGCTGTT
CTTCTTCTCCTATCACTCCCTGTGCTAGCAGCCGGAATTACAATACTCCTAACAGACCGAAATCTTAATACCTCATTCTT
TGACCCTGCAGGAGGGGGAGACCCAATCCTTTATCAACATCT
>8546_3933|Hemibrycon.caucanus|COI-5P
ACATGCATTTGTGATAATCTTCTTTATAGTAATACCAGTAATAATCGGTGGCTTCGGAAACTGACTTGTTCCTCTGATGA
TCGGTGCCCCCGATATGGCCTTTCCCCGTATGAATAACATAAGTTTCTGACTTTTACCCCCATCTTTCCTTCTCCTACTA
GCCTCATCTGGGGTTGAAGCCGGAGCAGGGACAGGTTGAACTGTTTATCCACCGCTCGCCGGAAACCTAGCACATGCAGG
GGCTTCCGTAGACCTAACTATTTTTTCACTCCACCTTGCCGGGGTATCTTCCATTTTAGGGGCGATCAACTTTATTACCA
CTATTATTAACATAAAACCACCAGCTATTTCACAATATCAAACGCCCCTATTTGTGTGAGCTGTTCTAATTACAGCTGTT
CTTCTTCTCCTATCACTCCCTGTGCTAGCAGCCGGAATTACAATACTCCTAACAGACCGAAATCTTAATACCTCATTCTT
TGATCCTGCAGGAGGGGGAGACCCAATCCTTTATCAACATCT
>7501_2461|Hemibrycon.caucanus|COI-5P
ACATGCATTTGTGATAATCTTCTTTATAGTAATACCAGTAATAATCGGTGGCTTCGGAAACTGACTTGTTCCTCTGATGA
TCGGCGCCCCCGATATGGCCTTTCCCCGTATGAATAACATAAGTTTCTGACTTTTACCCCCATCCTTCCTTCTCCTACTA
GCCTCATCTGGGGTTGAAGCCGGAGCTGGGACAGGTTGAACTGTTTACCCACCACTCGCCGGAAACCTAGCGCATGCAGG
GGCTTCCGTAGACCTAACTATTTTTTCACTCCACCTTGCCGGGGTATCTTCCATTTTAGGGGCGATCAACTTTATTACCA
CTATCATTAACATAAAACCACCAGCTATTTCACAATATCAAACGCCCTTATTTGTATGAGCTGTTCTAATTACAGCTGTT
CTTCTTCTCCTATCACTCCCCGTGCTAGCAGCCGGAATTACAATACTCCTAACAGACCGAAATCTTAATACCTCATTCTT
TGATCCTGCAGGAGGGGGAGACCCAATCCTTTATCAACNNNN
>7556_2540|Hemibrycon.caucanus|COI-5P
ACATGCATTTGTGATAATCTTCTTTATAGTAATACCAGTAATAATCGGTGGCTTCGGAAACTGACTTGTTCCTCTGATGA
TCGGCGCCCCCGATATGGCCTTTCCCCGTATGAATAACATAAGTTTCTGACTTTTACCCCCATCCTTCCTTCTCCTACTA
GCCTCATCTGGGGTTGAAGCCGGAGCTGGGACAGGTTGAACTGTTTACCCACCACTCGCCGGAAACCTAGCGCATGCAGG
GGCTTCCGTAGACCTAACTATTTTTTCACTCCACCTTGCCGGGGTATCTTCCATTTTAGGGGCGATCAACTTTATTACCA
CTATCATTAACATAAAACCACCAGCTATTTCACAATATCAAACGCCCTTATTTGTATGAGCTGTTCTAATTACAGCTGTT
CTTCTTCTCCTATCACTCCCCGTGCTAGCAGCCGGAATTACAATACTCCTAACAGACCGAAATCTTAATACCTCATTCTT
TGATCCTGCAGGAGGGGGAGACCCAATCCTTTATCAACANNN
>8065_3612|Hemibrycon.caucanus|COI-5P
ACATGCATTTGTGATAATCTTCTTTATAGTAATACCANTAATAATCGGTGGCTTCGGAAACTGACTTGTTCCTCTGATGA
TCGGCGCCCCCGATATGGCCTTTCCCCGWATGAATAACATAAGTTTCTGACTTTTACCCCCATCCTTCCTTCTCCTACTA
GCCTCATCTGGGGTTGAAGCCGGAGCTGGGACAGGTTGAACTGTTTACCCACCACTCGCCGGAAACCTAGCGCATGCAGG
GGCTTCCGTAGACCTAACTATTTTTTCACTCCACCTTGCCGGGGTATCTTCCATTTTAGGGGCGATCAACTTTATTACCA
CTATCATTAACATAAAACCACCAGCTATTTCACAATATCAAACGCCCTTATTTGTATGAGCTGTTCTAATTACAGCTGTT
CTTCTTCTCCTATCACTCCCCGTGCTAGCAGCCGGAATTACAATACTCCTAACAGACCGAAATCTTAATACCTCATTCTT
TGATCCTGCAGGAGGGGGAGACCCAATCCTTTATCAACATNN
>7591_2561|Hemibrycon.sp|COI-5P
ACATGCATTTGTGATAATCTTCTTTATAGTAATACCAGTAATAATCGGTGGCTTCGGAAACTGACTTGTTCCTCTGATGA
TCGGCGCCCCCGATATGGCCTTTCCCCGTATGAATAACATAAGTTTCTGACTTTTACCCCCATCCTTCCTTCTCCTACTA
GCCTCATCTGGGGTTGAAGCCGGAGCTGGGACAGGTTGAACTGTTTACCCACCACTCGCCGGAAACCTAGCGCATGCAGG
GGCTTCCGTAGACCTAACTATTTTTTCACTCCACCTTGCCGGGGTATCTTCCATTTTAGGGGCGATCAACTTTATTACCA
CTATCATTAACATAAAACCACCAGCTATTTCACAATATCAAACGCCCTTATTTGTATGAGCTGTTCTAATTACAGCTGTT
CTTCTTCTCCTATCACTCCCCGTGCTAGCAGCCGGAATTACAATACTCCTAACAGACCGAAATCTTAATACCTCATTCTT
TGATCCTGCAGGAGGGGGAGACCCAATCCTTTATCAACATCT
>7590_2561|Hemibrycon.sp|COI-5P
ACATGCATTTGTGATAATCTTCTTTATAGTAATACCAGTAATAATCGGTGGCTTCGGAAACTGACTTGTTCCTCTGATGA
TCGGCGCCCCCGATATGGCCTTTCCCCGTATGAATAACATAAGTTTCTGACTTTTACCCCCATCCTTCCTTCTCCTACTA
GCCTCATCTGGGGTTGAAGCCGGAGCTGGGACAGGTTGAACTGTTTACCCACCACTCGCCGGAAACCTAGCACATGCAGG
GGCTTCCGTAGACCTAACTATTTTTTCACTCCACCTTGCCGGGGTATCTTCCATTTTAGGGGCGATCAACTTTATTACCA
CTATCATTAACATAAAACCACCAGCTATTTCACAATATCAAACGCCCTTATTTGTATGAGCTGTTCTAATTACAGCTGTT
CTTCTTCTCCTATCACTCCCCGTGCTAGCAGCCGGAATTACAATACTCCTAACAGACCGAAATCTTAATACCTCATTCTT
TGATCCTGCAGGAGGGGGAGACCCAATCCTTTATCAGCATCT
>7928_4231|Hemibrycon.caucanus|COI-5P
ACATGCATTTGTGATAATCTTCTTTATAGTAATACCAGTAATAATTGGTGGCTTCGGAAACTGACTTGTTCCTCTGATGA
TCGGCGCCCCCGATATGGCCTTTCCCCGTATAAATAACATAAGTTTCTGACTTTTACCCCCATCCTTCCTTCTCCTACTA
GCCTCATCTGGGGTTGAAGCCGGAGCTGGGACAGGTTGAACTGTTTACCCACCACTCGCCGGAAACCTAGCACATGCAGG
GGCTTCCGTAGACCTAACTATTTTTTCACTCCACCTTGCCGGGGTATCTTCCATTTTAGGGGCGATCAACTTTATTACCA
CTATCATTAACATAAAACCACCAGCTATTTCACAATATCAAACGCCCTTATTTGTATGAGCTGTTCTAATTACAGCTGTT
CTTCTTCTCCTATCACTCCCCGTGCTAGCAGCCGGAATTACAATACTCCTAACAGACCGAAATCTTAATACCTCATTCTT
TGATCCTGCAGGAGGGGGAGACCCAATCCTTTATCAGCANNN
>7592_2561|Hemibrycon.sp|COI-5P
ACATGCATTTGTGATAATCTTCTTTATAGTAATACCAGTAATAATCGGTGGCTTCGGAAACTGACTTGTTCCTCTGATGA
TCGGCGCCCCCGATATGGCCTTTCCCCGTATGAATAACATAAGTTTCTGACTTTTACCCCCATCCTTCCTTCTCCTACTA
GCCTCATCTGGGGTTGAAGCCGGAGCTGGGACAGGTTGAACTGTTTACCCACCACTCGCCGGAAACCTAGCACATGCAGG
GGCTTCCGTAGACCTAACTATTTTTTCACTCCACCTTGCCGGGGTATCTTCCATTTTAGGGGCGATCAACTTTATTACCA
CTATCATTAACATAAAACCACCAGCTATTTCACAATATCAAACGCCCTTATTTGTATGAGCTGTTCTAATTACAGCTGTT
CTTCTTCTCCTATCACTCCCCGTGCTAGCAGCCGGAATTACAATACTCCTAACAGACCGAAATCTTAATACCTCATTCTT
TGATCCTGCAGGAGGGGGAGACCCAATCCTTTATCAGCATCT
>7419_1935|Hemibrycon.caucanus|COI-5P
ACATGCATTTGTAATAATCTTCTTTATAGTAATACCAGTAATAATTGGTGGCTTCGGAAACTGACTTGTTCCTCTAATGA
TTGGTGCCCCCGATATGGCCTTTCCCCGCATGAATAACATAAGTTTCTGACTTTTACCCCCATCTTTCCTTCTCCTACTA
GCCTCATCTGGGGTTGAAGCCGGGGCAGGAACAGGTTGAACTGTTTATCCACCCCTCGCCGGGAACCTAGCACATGCAGG
GGCTTCCGTAGACCTAACAATTTTTTCACTCCACCTTGCCGGGGTGTCTTCCATTTTAGGGGCAATCAACTTTATTACCA
CTATCATTAACATAAAACCACCAGCTATTTCACAATATCAAACGCCCTTATTTGTGTGAGCTGTTCTAATTACAGCTGTT
CTTCTTCTCCTGTCGCTTCCTGTACTAGCAGCCGGAATTACAATACTCCTAACAGACCGAAATCTTAATACCTCATTCTT
TGATCCTGCAGGAGGGGGAGACCCAATCCTTTATCAACATCT
>7423_1932|Hemibrycon.caucanus|COI-5P
ACATGCATTTGTAATAATCTTCTTTATAGTAATACCAGTAATAATTGGTGGCTTCGGAAACTGACTTGTTCCTCTGATGA
TTGGTGCCCCCGATATGGCCTTTCCCCGCATGAATAACATAAGTTTCTGACTTTTACCCCCATCTTTCCTTCTCCTACTA
GCCTCATCTGGGGTTGAAGCCGGGGCAGGAACAGGTTGAACTGTTTATCCACCCCTCGCCGGGAACCTAGCACATGCAGG
GGCTTCCGTAGACCTAACAATTTTTTCACTCCACCTTGCCGGGGTGTCTTCCATTTTAGGGGCAATCAACTTTATTACCA
CTATCATTAACATAAAACCACCAGCTATTTCACAATATCAAACGCCCTTATTTGTGTGAGCTGTTCTAATTACAGCTGTT
CTTCTTCTCCTGTCGCTTCCTGTACTAGCAGCCGGAATTACAATACTCCTAACAGACCGAAATCTTAATACCTCATTCTT
TGATCCTGCAGGAGGGGGAGACCCAATCCTTTATCAACATCN
>9067_5071|Hemibrycon.sp|COI-5P
ACATGCATTTGTAATAATCTTCTTTATAGTAATACCAGTAATAATTGGTGGCTTCGGAAACTGACTTGTTCCTCTGATGA
TTGGTGCCCCCGATATGGCCTTTCCCCGCATGAATAACATAAGTTTCTGACTTTTACCCCCATCTTTCCTTCTCCTACTA
GCCTCATCTGGAGTTGAAGCCGGGGCAGGAACAGGTTGAACTGTTTATCCACCCCTCGCCGGGAACCTAGCACATGCAGG
GGCTTCCGTAGACCTAACAATTTTTTCACTCCACCTTGCCGGGGTGTCTTCCATTTTAGGGGCAATCAACTTTATTACCA
CTATCATTAACATAAAACCACCAGCTATTTCACAATATCAAACGCCCTTATTTGTGTGAGCTGTTCTAATTACAGCTGTT
CTTCTTCTCCTGTCGCTTCCTGTACTAGCAGCCGGAATTACAATACTCCTAACAGACCGAAATCTTAATACCTCATTCTT
TGATCCTGCAGGAGGGGGAGACCCAATCCTTTATCAACATCN
>9066_5071|Hemibrycon.sp|COI-5P
ACATGCATTTGTAATAATCTTCTTTATAGTAATACCAGTAATAATTGGTGGCTTCGGAAACTGACTTGTTCCTCTGATGA
TTGGTGCCCCCGATATGGCCTTTCCCCGCATGAATAACATAAGTTTCTGACTTTTACCCCCATCTTTCCTTCTCCTACTA
GCCTCATCTGGGGTTGAAGCCGGGGCAGGAACAGGTTGAACTGTTTATCCACCCCTCGCCGGGAACCTAGCACATGCAGG
GGCTTCCGTAGACCTAACAATTTTTTCACTCCACCTTGCCGGGGTGTCTTCCATTTTAGGGGCAATCAACTTTATTACCA
CTATCATTAACATAAAACCACCAGCTATTTCACAATATCAAACGCCCTTATTTGTGTGAGCTGTTCTAATTACAGCTGTT
CTTCTTCTCCTGTCGCTTCCTGTACTAGCAGCCGGAATTACAATACTCCTAACAGACCGAAATCTTAATACCTCATTCTT
TGATCCTGCAGGAGGGGGAGACCCAATCCTTTATCAACATCN
>9068_5071|Hemibrycon.sp|COI-5P
ACATGCATTTGTGATAATCTTCTTTATAGTAATACCAGTAATAATTGGTGGCTTCGGAAACTGACTTGTTCCTCTGATGA
TTGGTGCCCCCGATATGGCCTTTCCCCGCATGAATAACATAAGTTTCTGACTTTTACCCCCATCTTTCCTTCTCCTACTA
GCCTCATCTGGGGTTGAAGCCGGGGCAGGAACAGGTTGAACTGTTTATCCACCCCTCGCCGGGAACCTAGCACATGCAGG
GGCTTCCGTAGACCTAACAATTTTTTCACTCCACCTTGCCGGGGTGTCTTCCATTTTAGGGGCAATCAACTTTATTACCA
CTATCATTAACATAAAACCACCAGCTATTTCACAATATCAAACGCCCTTATTTGTGTGAGCTGTTCTAATTACAGCTGTT
CTTCTTCTCCTGTCGCTTCCTGTACTAGCAGCCGGAATTACAATACTCCTAACAGACCGAAATCTTAATACCTCATTCTT
TGATCCTGCAGGAGGGGGAGACCCAATCCTTTATCAACATCN
>9070_5075|Hemibrycon.sp|COI-5P
ACATGCATTTGTGATAATCTTCTTTATAGTAATACCAGTAATAATTGGTGGCTTCGGAAACTGACTTGTTCCTCTGATGA
TTGGTGCCCCCGATATGGCCTTTCCCCGCATGAATAACATAAGTTTCTGACTTTTACCCCCATCTTTCCTTCTCCTACTA
GCCTCATCTGGGGTTGAAGCCGGGGCAGGAACAGGTTGAACTGTTTATCCACCCCTCGCCGGGAACCTAGCACATGCAGG
GGCTTCCGTAGACCTAACAATTTTTTCACTCCACCTTGCCGGGGTGTCTTCCATTTTAGGGGCAATCAACTTTATTACCA
CTATCATTAACATAAAACCACCAGCTATTTCACAATATCAAACGCCCTTATTTGTGTGAGCTGTTCTAATTACAGCTGTT
CTTCTTCTCCTGTCGCTTCCTGTACTAGCAGCCGGAATTACAATACTCCTAACAGACCGAAATCTTAATACCTCATTCTT
TGATCCTGCAGGAGGGGGAGACCCAATCCTTTATCAACATCN
>5119C_5119|Hemibrycon.sp|COI-5P
ACATGCATTTGTGATAATCTTCTTTATAGTAATACCAGTAATAATTGGTGGCTTCGGAAACTGACTTGTTCCTCTGATGA
TTGGTGCCCCCGATATGGCCTTTCCCCGCATGAATAACATAAGTTTCTGACTTTTACCCCCATCTTTCCTTCTCCTACTA
GCCTCATCTGGGGTTGAAGCCGGGGCAGGAACAGGTTGAACTGTTTATCCACCCCTCGCCGGGAACCTAGCACATGCAGG
GGCTTCCGTAGACCTAACAATTTTTTCACTCCACCTTGCCGGGGTGTCTTCCATTTTAGGGGCAATCAACTTTATTACCA
CTATCATTAACATAAAACCACCAGCTATTTCACAATATCAAACGCCCTTATTTGTGTGAGCTGTTCTAATTACAGCTGTT
CTTCTTCTCCTGTCGCTTCCTGTACTAGCAGCCGGAATTACAATACTCCTAACAGACCGAAATCTTAATACCTCATTCTT
TGATCCTGCAGGAGGGGGAGACCCAATCCTTTATCAACATCT
>5119F_5119|Hemibrycon.sp|COI-5P
ACATGCATTTGTGATAATCTTCTTTATAGTAATACCAGTAATAATTGGTGGCTTCGGAAACTGACTTGTTCCTCTGATGA
TTGGTGCCCCCGATATGGCCTTTCCCCGCATGAATAACATAAGTTTCTGACTTTTACCCCCATCTTTCCTTCTCCTACTA
GCCTCATCTGGGGTTGAAGCCGGGGCAGGAACAGGTTGAACTGTTTATCCACCCCTCGCCGGGAACCTAGCACATGCAGG
GGCTTCCGTAGACCTAACAATTTTTTCACTCCACCTTGCCGGGGTGTCTTCCATTTTAGGGGCAATCAACTTTATTACCA
CTATCATTAACATAAAACCACCAGCTATTTCACAATATCAAACGCCCTTATTTGTGTGAGCTGTTCTAATTACAGCTGTT
CTTCTTCTCCTGTCGCTTCCTGTACTAGCAGCCGGAATTACAATACTCCTAACAGACCGAAATCTTAATACCTCATTCTT
TGATCCTGCAGGAGGGGGAGACCCAATCCTTTATCAACATCT
>5119B_5119|Hemibrycon.sp|COI-5P
ACATGCATTTGTGATAATCTTCTTTATAGTAATACCAGTAATAATTGGTGGCTTCGGAAACTGACTTGTTCCTCTGATGA
TTGGTGCCCCCGATATGGCCTTTCCCCGCATGAATAACATAAGTTTCTGACTTTTACCCCCATCTTTCCTTCTCCTACTA
GCCTCATCTGGGGTTGAAGCCGGGGCAGGAACAGGTTGAACTGTTTATCCACCCCTCGCCGGGAACCTAGCACATGCAGG
GGCTTCCGTAGACCTAACAATTTTTTCACTCCACCTTGCCGGGGTGTCTTCCATTTTAGGGGCAATCAACTTTATTACCA
CTATCATTAACATAAAACCACCAGCTATTTCACAATATCAAACGCCCTTATTTGTGTGAGCTGTTCTAATTACAGCTGTT
CTTCTTCTCCTGTCGCTTCCTGTACTAGCAGCCGGAATTACAATACTCCTAACAGACCGAAATCTTAATACCTCATTCTT
TGATCCTGCAGGAGGGGGAGACCCAATCCTTTATCAACATCT
>5119A_5119|Hemibrycon.sp|COI-5P
ACATGCATTTGTGATAATCTTCTTTATAGTAATACCAGTAATAATTGGTGGCTTCGGAAACTGACTTGTTCCTCTGATGA
TTGGTGCCCCCGATATGGCCTTTCCCCGCATGAATAACATAAGTTTCTGACTTTTACCCCCATCTTTCCTTCTCCTACTA
GCCTCATCTGGGGTTGAAGCCGGGGCAGGAACAGGTTGAACTGTTTATCCACCCCTCGCCGGGAACCTAGCACATGCAGG
GGCTTCCGTAGACCTAACAATTTTTTCACTCCACCTTGCCGGGGTGTCTTCCATTTTAGGGGCAATCAACTTTATTACCA
CTATCATTAACATAAAACCACCAGCTATTTCACAATATCAAACGCCCTTATTTGTGTGAGCTGTTCTAATTACAGCTGTT
CTTCTTCTCCTGTCGCTTCCTGTACTAGCAGCCGGAATTACAATACTCCTAACAGACCGAAATCTTAATACCTCATTCTT
TGATCCTGCAGGAGGGGGAGACCCAATCCTTTATCAACATCT
>5119D_5119|Hemibrycon.sp|COI-5P
ACATGCATTTGTGATAATCTTCTTTATAGTAATACCAGTAATAATTGGTGGCTTCGGAAACTGACTTGTTCCTCTGATGA
TTGGTGCCCCCGATATGGCCTTTCCCCGCATGAATAACATAAGTTTCTGACTTTTACCCCCATCTTTCCTTCTCCTACTA
GCCTCATCTGGGGTTGAAGCCGGGGCAGGAACAGGTTGAACTGTTTATCCACCCCTCGCCGGGAACCTAGCACATGCAGG
GGCTTCCGTAGACCTAACAATTTTTTCACTCCACCTTGCCGGGGTGTCTTCCATTTTAGGGGCAATCAACTTTATTACCA
CTATCATTAACATAAAACCACCAGCTATTTCACAATATCAAACGCCCTTATTTGTGTGAGCTGTTCTAATTACAGCTGTT
CTTCTTCTCCTGTCGCTTCCTGTACTAGCAGCCGGAATTACAATACTCCTAACAGACCGAAATCTTAATACCTCATTCTT
TGATCCTGCAGGAGGGGGAGACCCAATCCTTTATCAACATCT
>5326A_5326|Hemibrycon.caucanus|COI-5P
ACATGCATTTGTAATAATCTTCTTTATAGTAATACCAGTAATAATTGGTGGCTTCGGAAACTGACTTGTTCCTCTGATGA
TTGGTGCCCCCGATATGGCCTTTCCCCGCATGAATAACATAAGTTTCTGACTTTTACCCCCATCTTTCCTTCTCCTACTA
GCCTCATCTGGGGTTGAAGCCGGGGCAGGAACAGGTTGAACTGTTTATCCACCCCTCGCCGGGAACCTAGCACATGCAGG
GGCTTCCGTAGACCTAACAATTTTTTCACTCCACCTTGCCGGGGTGTCTTCCATTTTAGGGGCAATCAACTTTATTACCA
CTATCATTAACATAAAACCACCAGCTATTTCACAATATCAAACGCCCTTATTTGTGTGAGCTGTTCTAATTACAGCTGTT
CTTCTTCTCCTGTCGCTTCCTGTACTAGCAGCCGGAATTACAATACTCCTAACAGACCGAAATCTTAATACCTCATTCTT
TGATCCTGCAGGAGGGGGAGACCCAATCCTTTATCAACANNN
>5326C_5326|Hemibrycon.caucanus|COI-5P
ACATGCATTTGTAATAATCTTCTTTATAGTAATACCAGTAATAATTGGTGGCTTCGGAAACTGACTTGTTCCTCTGATGA
TTGGTGCCCCCGATATGGCCTTTCCCCGCATGAATAACATAAGTTTCTGACTTTTACCCCCATCTTTCCTTCTCCTACTA
GCCTCATCTGGGGTTGAAGCCGGGGCAGGAACAGGTTGAACTGTTTATCCACCCCTCGCCGGGAACCTAGCACATGCAGG
GGCTTCCGTAGACCTAACAATTTTTTCACTCCACCTTGCCGGGGTGTCTTCCATTTTAGGGGCAATCAACTTTATTACCA
CTATCATTAACATAAAACCACCAGCTATTTCACAATATCAAACGCCCTTATTTGTGTGAGCTGTTCTAATTACAGCTGTT
CTTCTTCTCCTGTCGCTTCCTGTACTAGCAGCCGGAATTACAATACTCCTAACAGACCGAAATCTTAATACCTCATTCTT
TGATCCTGCAGGAGGGGGAGACCCAATCCTTTATCAACANNN
>5119E_5119|Hemibrycon.sp|COI-5P
ACATGCATTTGTAATAATCTTCTTTATAGTAATACCAGTAATAATTGGTGGCTTCGGAAACTGACTTGTTCCTCTGATGA
TTGGTGCCCCCGATATGGCCTTTCCCCGCATGAATAACATAAGTTTCTGACTTTTACCCCCATCTTTCCTTCTCCTACTA
GCCTCATCTGGGGTTGAAGCCGGGGCAGGAACAGGTTGAACTGTTTATCCACCCCTCGCCGGGAACCTAGCACATGCAGG
GGCTTCCGTAGACCTAACAATTTTTTCACTCCACCTTGCCGGGGTGTCTTCCATTTTAGGGGCAATCAACTTTATTACCA
CTATCATTAACATAAAACCACCAGCTATTTCACAATATCAAACGCCCTTATTTGTGTGAGCTGTTCTAATTACAGCTGTT
CTTCTTCTCCTGTCGCTTCCTGTACTAGCAGCCGGAATTACAATACTCCTAACAGACCGAAATCTTAATACCTCATTCTT
TGATCCTGCAGGAGGGGGAGACCCAATCCTTTATCAACATCT
>5119G_5119|Hemibrycon.sp|COI-5P
ACATGCATTTGTAATAATCTTCTTTATAGTAATACCAGTAATAATTGGTGGCTTCGGAAACTGACTTGTTCCTCTAATGA
TTGGTGCCCCCGATATGGCCTTTCCCCGCATGAATAACATAAGTTTCTGACTTTTACCCCCATCTTTCCTTCTCCTACTA
GCCTCATCTGGGGTTGAAGCCGGGGCAGGAACAGGTTGAACTGTTTATCCACCCCTCGCCGGGAACCTAGCACATGCAGG
GGCTTCCGTAGACCTAACAATTTTTTCACTCCACCTTGCCGGGGTGTCTTCCATTTTAGGGGCAATCAACTTTATTACCA
CTATCATTAACATAAAACCACCAGCTATTTCACAATATCAAACGCCCTTATTTGTGTGAGCTGTTCTAATTACAGCTGTT
CTTCTTCTCCTGTCGCTTCCTGTACTAGCAGCCGGAATTACAATACTCCTAACAGACCGAAATCTTAATACCTCATTCTT
TGATCCTGCAGGAGGGGGAGACCCAATCCTTTATCAACATCT
>7425_1931|Hemibrycon.caucanus|COI-5P
ACATGCATTTGTGATAATCTTCTTTATAGTAATACCAGTAATAATTGGTGGCTTCGGAAACTGACTTGTTCCTCTGATGA
TTGGTGCCCCCGATATGGCCTTTCCCCGCATGAATAACATAAGTTTCTGACTTTTACCCCCATCTTTCCTTCTCCTACTA
GCCTCATCTGGGGTTGAAGCCGGAGCAGGAACAGGTTGAACTGTTTATCCACCCCTCGCCGGGAACCTAGCACATGCAGG
GGCTTCCGTAGACCTAACAATTTTTTCACTCCACCTTGCCGGGGTGTCTTCCATTTTAGGGGCAATCAACTTTATTACCA
CTATCATTAACATAAAACCACCAGCTATTTCACAATATCAAACGCCCTTATTTGTGTGAGCTGTTCTAATTACAGCTGTT
CTTCTTCTCCTGTCGCTTCCTGTACTAGCAGCCGGAATTACAATACTCCTAACAGACCGAAATCTTAATACCTCATTCTT
TGATCCTGCAGGAGGGGGAGACCCAATCCTTTATCAACATCN
>9065_5071|Hemibrycon.sp|COI-5P
ACATGCATTTGTGATAATCTTCTTTATAGTAATACCAGTAATAATTGGTGGCTTCGGAAACTGACTTGTTCCTCTGATGA
TTGGTGCCCCCGATATGGCCTTTCCCCGCATGAATAACATAAGTTTCTGACTTTTACCCCCATCTTTCCTTCTCCTACTA
GCCTCATCTGGGGTTGAAGCCGGAGCAGGAACAGGTTGAACTGTTTATCCACCCCTCGCCGGGAACCTAGCACATGCAGG
GGCTTCCGTAGACCTAACAATTTTTTCACTCCACCTTGCCGGGGTGTCTTCCATTTTAGGGGCAATCAACTTTATTACCA
CTATCATTAACATAAAACCACCAGCTATTTCACAATATCAAACGCCCTTATTTGTGTGAGCTGTTCTAATTACAGCTGTT
CTTCTTCTCCTGTCGCTTCCTGTACTAGCAGCCGGAATTACAATACTCCTAACAGACCGAAATCTTAATACCTCATTCTT
TGATCCTGCAGGAGGGGGAGACCCAATCCTTTATCAACATCN
>8058_3611|Hemibrycon.caucanus|COI-5P
ACATGCATTTGTGATAATCTTCTTTATAGTAATACCAGTAATAATTGGTGGCTTCGGAAACTGACTTGTTCCTCTGATGA
TTGGTGCCCCCGATATGGCCTTTCCCCGCATGAATAACATAAGTTTCTGACTTTTACCCCCATCTTTCCTTCTCCTACTA
GCCTCATCTGGGGTTGAAGCCGGAGCAGGAACAGGTTGAACTGTTTATCCACCCCTCGCCGGGAACCTAGCACATGCAGG
GGCTTCCGTAGACCTAACAATTTTTTCACTCCACCTTGCCGGGGTGTCTTCCATTTTAGGGGCAATCAACTTTATTACCA
CTATCATTAACATAAAACCACCAGCTATTTCACAATATCAAACGCCCTTATTTGTGTGAGCTGTTCTAATTACAGCTGTT
CTTCTTCTCCTGTCGCTTCCTGTACTAGCAGCCGGAATTACAATACTCCTAACAGACCGAAATCTTAATACCTCATTCTT
TGATCCTGCAGGAGGGGGAGACCCAATCCTTTATCANNNNNN
>5326B_5326|Hemibrycon.caucanus|COI-5P
ACATGCATTTGTGATAATCTTCTTTATAGTAATACCAGTAATAATTGGTGGCTTCGGAAACTGACTTGTTCCTCTGATGA
TTGGTGCCCCCGATATGGCCTTTCCCCGCATGAATAACATAAGTTTCTGACTTTTACCCCCATCTTTCCTTCTCCTACTA
GCCTCATCTGGGGTTGAAGCCGGAGCAGGAACAGGTTGAACTGTTTACCCACCCCTCGCCGGGAACCTAGCACATGCAGG
GGCTTCCGTAGACCTAACAATTTTTTCACTCCACCTTGCCGGGGTGTCTTCCATTTTAGGGGCAATCAACTTTATTACCA
CTATCATTAACATAAAACCACCAGCTATTTCACAATATCAAACGCCCTTATTTGTGTGAGCTGTTCTAATTACAGCTGTT
CTTCTTCTCCTGTCGCTTCCTGTACTAGCAGCCGGAATTACAATACTCCTAACAGACCGAAATCTTAATACCTCATTCTT
TGATCCTGCAGGAGGGGGAGACCCAATCCTTTATCAACANNN
>8519_3895|Hemibrycon.rafaelense|COI-5P
ACATGCATTTGTGATAATCTTCTTTATAGTAATACCAGTAATAATTGGTGGCTTCGGAAACTGACTTGTTCCTCTAATGA
TCGGTGCCCCCGATATGGCCTTTCCCCGGATAAATAATATGAGTTTCTGACTCTTGCCCCCATCCTTCCTTCTCCTACTA
GCCTCATCTGGGGTCGAAGCTGGAGCAGGGACAGGTTGGACTGTTTATCCACCACTCGCCGGGAATCTCGCACATGCAGG
GGCTTCTGTAGACCTAACTATCTTCTCACTCCACCTTGCCGGGGTGTCTTCCATTTTAGGGGCAATCAACTTTATTACCA
CTATTATTAATATAAAACCACCAGCCATTTCGCAATATCAAACGCCCTTATTTGTATGAGCTGTTCTAATTACAGCTGTC
CTTCTTCTTCTATCATTACCCGTACTAGCAGCCGCAATTACGATACTCCTAACAGACCGAAATCTCAATACCTCATTCTT
NNNNNNNNNNNNNNNNNNNNNNNNNNNNNNNNNNNNNNNNNN
>8524_3905|Hemibrycon.boquiae|COI-5P
ACATGCATTTGTGATAATCTTCTTTATAGTAATACCAGTAATAATTGGTGGCTTCGGAAACTGACTTGTTCCTCTAATGA
TCGGTGCCCCCGATATGGCCTTTCCCCGGATAAATAATATGAGTTTCTGACTCTTGCCCCCATCCTTCCTTCTCCTACTA
GCCTCATCTGGGGTCGAAGCTGGAGCAGGGACAGGTTGGACTGTTTATCCACCACTCGCCGGGAATCTCGCACATGCAGG
GGCTTCTGTAGACCTAACTATCTTCTCACTCCACCTTGCCGGGGTGTCTTCCATTTTAGGGGCAATCAACTTTATTACCA
CTATTATTAATATAAAACCACCAGCCATTTCGCAATATCAAACGCCCTTATTTGTATGAGCTGTTCTAATTACAGCTGTC
CTTCTTCTTCTATCATTACCCGTACTAGCAGCCGCAATTACGATACTCCTAACAGACCGAAATCTCAATACCTCATTCTT
TGATCCTGCGGGAGGGGGGGACCCAATCCTTTATCAACNNNN
>8410_3960|Hemibrycon.boquiae|COI-5P
ACATGCATTTGTGATAATCTTCTTTATAGTAATACCAGTAATAATTGGTGGCTTCGGAAACTGACTTGTTCCTCTAATGA
TCGGTGCCCCCGATATGGCCTTTCCCCGGATAAATAATATGAGTTTCTGACTCTTGCCCCCATCCTTCCTTCTCCTACTA
GCCTCATCTGGGGTCGAAGCTGGAGCAGGGACAGGTTGGACTGTTTATCCNCCACTCGCCGGGAATCTCGCACATGCAGG
GGCTTCTGTAGACCTAACTATCTTCTCACTCCACCTTGCCGGGGTGTCTTCCATTTTAGGGGCAATCAACTTTATTACCA
CTATTATTAATATAAAACCACCAGCCATTTCGCAATATCAAACGCCCTTATTTGTATGAGCTGTTCTAATTACAGCTGTC
CTTCTTCTTCTATCATTACCCGTACTAGCAGCCGCAATTACGATACTCCTAACAGACCGAAATCTCAATACCTCATTCTT
TGATCCTGCGGGAGGGGGGGACCCAATCCTTTATCAACNNNN
>8313_3805|Hemibrycon.boquiae|COI-5P
NNNNNCATTTGTGATAATCTTCTTTATAGTAATACCAGTAATAATTGGTGGCTTCGGAAACTGACTTGTTCCTCTAATGA
TCGGTGCCCCCGATATGGCCTTTCCCCGGATAAATAATATGANTTTCTGACTCTTGCCCCCATCCTTCCTTCTCCTACTA
GCCTCATCTGGGGTCGAAGCTGGAGCAGGGACAGGNTGGACTGTTTATCCACCACTCGCCGGGAATCTCGCACATGCAGG
GGCTTCTGTAGACCTAACTATCTTCTCACTCCACCTTGCCGGGGTGTCTTCCATTTTAGGGGCAATCAACTTTATTACCA
CTATTATTAATATAAAACCACCAGCCATTTCGCAATATCAAACGCCCTTATTTGTATGAGCTGTTCTAATTACAGCTGTC
CTTCTTCTTCTATCATTACCCGTACTAGCAGCCGCAATTACGATACTCCTAACAGACCGAAATCTCAATACCTCATTCTT
TGATCCTGCGGGAGGGGGGGACCCAATCCTTTATCAACNNNN
>8373_3944|Hemibrycon.boquiae|COI-5P
ACATGCATTTGTGATAATCTTCTTTATAGTAATACCAGTAATAATTGGTGGCTTCGGAAACTGACTTGTTCCTCTAATGA
TCGGTGCCCCCGATATGGCCTTTCCCCGGATAAATAATATGAGTTTCTGACTCTTGCCCCCATCCTTCCTTCTCCTACTA
GCCTCATCTGGGGTCGAAGCTGGAGCAGGGACAGGTTGGACTGTTTATCCACCACTCGCCGGGAATCTCGCACATGCAGG
GGCTTCTGTAGACCTAACTATCTTCTCACTCCACCTTGCCGGGGTGTCTTCCATTTTAGGGGCAATCAACTTTATTACCA
CTATTATTAATATAAAACCACCAGCCATTTCGCAATATCAAACGCCCTTATTTGTATGAGCTGTTCTAATTACAGCTGTC
CTTCTTCTTCTATCATTACCCGTACTAGCAGCCGCAATTACGATACTCCTAACAGACCGAAATCTCAATACCTCATTCTT
TGATCCTGCGGGAGGGGGGGACCCAATCCTTTATCAACNNNN
>8390_3965|Hemibrycon.boquiae|COI-5P
ACATGCATTTGTGATAATCTTCTTTATAGTAATACCAGTAATAATTGGTGGCTTCGGAAACTGACTTGTTCCTCTAATGA
TCGGTGCCCCCGATATGGCCTTTCCCCGGATAAATAATATGAGTTTCTGACTCTTGCCCCCATCCTTCCTTCTCCTACTA
GCCTCATCTGGGGTCGAAGCTGGAGCAGGGACAGGTTGGACTGTTTATCCACCACTCGCCGGGAATCTCGCACATGCAGG
GGCTTCTGTAGACCTAACTATCTTCTCACTCCACCTTGCCGGGGTGTCTTCCATTTTAGGGGCAATCAACTTTATTACCA
CTATTATTAATATAAAACCACCAGCCATTTCGCAATATCAAACGCCCTTATTTGTATGAGCTGTTCTAATTACAGCTGTC
CTTCTTCTTCTATCATTACCCGTACTAGCAGCCGCAATTACGATACTCCTAACAGACCGAAATCTCAATACCTCATTCTT
TGATCCTGCGGGAGGGGGGGACCCAATCCTTTATCAACNNNN
>8394_3951|Hemibrycon.boquiae|COI-5P
ACATGCATTTGTGATAATCTTCTTTATAGTAATACCAGTAATAATTGGTGGCTTCGGAAACTGACTTGTTCCTCTAATGA
TCGGTGCCCCCGATATGGCCTTTCCCCGGATAAATAATATGAGTTTCTGACTCTTGCCCCCATCCTTCCTTCTCCTACTA
GCCTCATCTGGGGTCGAAGCTGGAGCAGGGACAGGTTGGACTGTTTATCCACCACTCGCCGGGAATCTCGCACATGCAGG
GGCTTCTGTAGACCTAACTATCTTCTCACTCCACCTTGCCGGGGTGTCTTCCATTTTAGGGGCAATCAACTTTATTACCA
CTATTATTAATATAAAACCACCAGCCATTTCGCAATATCAAACGCCCTTATTTGTATGAGCTGTTCTAATTACAGCTGTC
CTTCTTCTTCTATCATTACCCGTACTAGCAGCCGCAATTACGATACTCCTAACAGACCGAAATCTCAATACCTCATTCTT
TGATCCTGCGGGAGGGGGGGACCCAATCCTTTATCAACNNNN
>8570_3935|Hemibrycon.boquiae|COI-5P
ACATGCATTTGTGATAATCTTCTTTATAGTAATACCAGTAATAATTGGTGGCTTCGGAAACTGACTTGTTCCTCTAATGA
TCGGTGCCCCCGATATGGCCTTTCCCCGGATAAATAATATGAGTTTCTGACTCTTGCCCCCATCCTTCCTTCTCCTACTA
GCCTCATCTGGGGTCGAAGCTGGAGCAGGGACAGGTTGGACTGTTTATCCACCACTCGCCGGGAATCTCGCACATGCAGG
GGCTTCTGTAGACCTAACTATCTTCTCACTCCACCTTGCCGGGGTGTCTTCCATTTTAGGGGCAATCAACTTTATTACCA
CTATTATTAATATAAAACCACCAGCCATTTCGCAATATCAAACGCCCTTATTTGTATGAGCTGTTCTAATTACAGCTGTC
CTTCTTCTTCTATCATTACCCGTACTAGCAGCCGCAATTACGATACTCCTAACAGACCGAAATCTCAATACCTCATTCTT
TGATCCTGCGGGAGGGGGGGACCCAATCCTTTATCAACNNNN
>8395_3951|Hemibrycon.antioquiae|COI-5P
ACATGCATTTGTGATAATCTTCTTTATAGTAATACCAGTAATAATTGGTGGCTTCGGAAACTGACTTGTTCCTCTAATGA
TCGGTGCCCCCGATATGGCCTTTCCCCGGATAAATAATATGAGTTTCTGACTCTTGCCCCCATCCTTCCTTCTCCTACTA
GCCTCATCTGGGGTCGAAGCTGGAGCAGGGACAGGTTGGACTGTTTATCCACCACTCGCCGGGAATCTCGCACATGCAGG
GGCTTCTGTAGACCTAACTATCTTCTCACTCCACCTTGCCGGGGTGTCTTCCATTTTAGGGGCAATCAACTTTATTACCA
CTATTATTAATATAAAACCACCAGCCATTTCGCAATATCAAACGCCCTTATTTGTATGAGCTGTTCTAATTACAGCTGTC
CTTCTTCTTCTATCATTACCCGTACTAGCAGCCGCAATTACGATACTCCTAACAGACCGAAATCTCAATACCTCATTCTT
TGATCCTGCGGGAGGGGGGGACCCAATCCTTTATCAACANNN
>5464A_5464|Hemibrycon.palomae|COI-5P
ACATGCATTTGTGATAATCTTCTTTATAGTAATACCAGTAATAATTGGTGGCTTCGGAAACTGACTTGTTCCTCTAATGA
TCGGTGCCCCCGATATGGCCTTTCCCCGGATAAATAATATGAGTTTCTGACTCTTGCCCCCATCCTTCCTTCTCCTACTA
GCCTCATCTGGGGTCGAAGCTGGAGCAGGGACAGGTTGGACTGTTTATCCACCACTCGCCGGGAATCTCGCACATGCAGG
GGCTTCTGTAGACCTAACTATCTTCTCACTCCACCTTGCCGGGGTGTCTTCCATTTTAGGGGCAATCAACTTTATTACCA
CTATTATTAATATAAAACCACCAGCCATTTCGCAATATCAAACGCCCTTATTTGTATGAGCTGTTCTAATTACAGCTGTC
CTTCTTCTTCTATCATTACCCGTACTAGCAGCCGCAATTACGATACTCCTAACAGACCGAAATCTCAATACCTCATTCTT
TGATCCTGCGGGAGGGGGGGACCCAATCCTTTATCAACATCT
>8510_3892|Hemibrycon.rafaelense|COI-5P
ACATGCATTTGTGATAATCTTCTTTATAGTAATACCAGTAATAATTGGTGGCTTCGGAAACTGACTTGTTCCTCTAATGA
TCGGTGCCCCCGATATGGCCTTTCCCCGGATAAATAATATGAGTTTCTGACTCTTGCCCCCATCCTTCCTTCTCCTACTA
GCCTCATCTGGGGTCGAAGCTGGAGCAGGGACAGGTTGGACTGTTTATCCACCACTCGCCGGGAATCTCGCACATGCAGG
GGCTTCTGTAGACCTAACTATCTTCTCACTCCACCTTGCCGGGGTGTCTTCCATTTTAGGGGCAATCAACTTTATTACCA
CTATTATTAATATAAAACCACCAGCCATTTCGCAATATCAAACGCCCTTATTTGTATGAGCTGTTCTAATTACAGCTGTC
CTTCTTCTTCTATCATTACCCGTACTAGCAGCCGCAATTACGATACTCCTAACAGACCGAAATCTCAATACCTCATTCTT
TGATCCTGCGGGAGGGGGGGACCCAATCCTTTATCAACATCT
>8518_3895|Hemibrycon.sp|COI-5P
ACATGCATTTGTGATAATCTTCTTTATAGTAATACCAGTAATAATTGGTGGCTTCGGAAACTGACTTGTTCCTCTAATGA
TCGGTGCCCCCGATATGGCCTTTCCCCGGATAAATAATATGAGTTTCTGACTCTTGCCCCCATCCTTCCTTCTCCTACTA
GCCTCATCTGGGGTCGAAGCTGGAGCAGGGACAGGTTGGACTGTTTATCCACCACTCGCCGGGAATCTCGCACATGCAGG
GGCTTCTGTAGACCTAACTATCTTCTCACTCCACCTTGCCGGGGTGTCTTCCATTTTAGGGGCAATCAACTTTATTACCA
CTATTATTAATATAAAACCACCAGCCATTTCGCAATATCAAACGCCCTTATTTGTATGAGCTGTTCTAATTACAGCTGTC
CTTCTTCTTCTATCATTACCCGTACTAGCAGCCGCAATTACGATACTCCTAACAGACCGAAATCTCAATACCTCATTCTT
TGATCCTGCGGGAGGGGGGGACCCAATCCTTTATCAACATCT
>8520_3895|Hemibrycon.rafaelense|COI-5P
ACATGCATTTGTGATAATCTTCTTTATAGTAATACCAGTAATAATTGGTGGCTTCGGAAACTGACTTGTTCCTCTAATGA
TCGGTGCCCCCGATATGGCCTTTCCCCGGATAAATAATATGAGTTTCTGACTCTTGCCCCCATCCTTCCTTCTCCTACTA
GCCTCATCTGGGGTCGAAGCTGGAGCAGGGACAGGTTGGACTGTTTATCCACCACTCGCCGGGAATCTCGCACATGCAGG
GGCTTCTGTAGACCTAACTATCTTCTCACTCCACCTTGCCGGGGTGTCTTCCATTTTAGGGGCAATCAACTTTATTACCA
CTATTATTAATATAAAACCACCAGCCATTTCGCAATATCAAACGCCCTTATTTGTATGAGCTGTTCTAATTACAGCTGTC
CTTCTTCTTCTATCATTACCCGTACTAGCAGCCGCAATTACGATACTCCTAACAGACCGAAATCTCAATACCTCATTCTT
TGATCCTGCGGGAGGGGGGGACCCAATCCTTTATCAACATCT
>8509_3892|Hemibrycon.rafaelense|COI-5P
ACATGCATTTGTGATAATCTTCTTTATAGTAATACCAGTAATAATTGGTGGCTTCGGAAACTGACTTGTTCCTCTAATGA
TCGGTGCCCCCGATATGGCCTTTCCCCGGATAAATAATATGAGTTTCTGACTCTTGCCCCCATCCTTCCTTCTCCTACTA
GCCTCATCTGGGGTCGAAGCTGGAGCAGGGACAGGTTGGACTGTTTATCCACCACTCGCCGGGAATCTCGCACATGCAGG
GGCTTCTGTAGACCTAACTATCTTCTCACTCCACCTTGCCGGGGTGTCTTCCATTTTAGGGGCAATCAACTTTATTACCA
CTATTATTAATATAAAACCACCAGCCATTTCGCAATATCAAACGCCCTTATTTGTATGAGCTGTTCTAATTACAGCTGTC
CTTCTTCTTCTATCATTACCCGTACTAGCAGCCGCAATTACGATACTCCTAACAGACCGAAATCTCAATACCTCATTCTT
TGATCCTGCGGGAGGGGGGGACCCAATCCTTTATCAACATCT
>5464B_5464|Hemibrycon.palomae|COI-5P
ACATGCATTTGTGATAATCTTCTTTATAGTAATACCAGTAATAATTGGTGGCTTCGGAAACTGACTTGTTCCTCTAATGA
TCGGTGCCCCCGATATGGCCTTTCCCCGGATAAATAATATGAGTTTCTGACTCTTGCCCCCATCCTTCCTTCTCCTACTA
GCCTCATCTGGGGTCGAAGCTGGAGCAGGGACAGGTTGGACTGTTTATCCACCACTCGCCGGGAATCTCGCACATGCAGG
GGCTTCTGTAGACCTAACTATCTTCTCACTCCACCTTGCCGGGGTGTCTTCCATTTTAGGGGCAATCAACTTTATTACCA
CTATTATTAATATAAAACCACCAGCCATTTCGCAATATCAAACGCCCTTATTTGTATGAGCTGTTCTAATTACAGCTGTC
CTTCTTCTTCTATCATTACCCGTACTAGCAGCCGCAATTACGATACTCCTAACAGACCGAAATCTCAATACCTCATTCTT
TGATCCTGCGGGAGGGGGGGACCCAATCCTTTATCAACATCT
>5464C_5464|Hemibrycon.palomae|COI-5P
ACATGCATTTGTGATAATCTTCTTTATAGTAATACCAGTAATAATTGGTGGCTTCGGAAACTGACTTGTTCCTCTAATGA
TCGGTGCCCCCGATATGGCCTTTCCCCGGATAAATAATATGAGTTTCTGACTCTTGCCCCCATCCTTCCTTCTCCTACTA
GCCTCATCTGGGGTCGAAGCTGGAGCAGGGACAGGTTGGACTGTTTATCCACCACTCGCCGGGAATCTCGCACATGCAGG
GGCTTCTGTAGACCTAACTATCTTCTCACTCCACCTTGCCGGGGTGTCTTCCATTTTAGGGGCAATCAACTTTATTACCA
CTATTATTAATATAAAACCACCAGCCATTTCGCAATATCAAACGCCCTTATTTGTATGAGCTGTTCTAATTACAGCTGTC
CTTCTTCTTCTATCATTACCCGTACTAGCAGCCGCAATTACGATACTCCTAACAGACCGAAATCTCAATACCTCATTCTT
TGATCCTGCGGGAGGGGGGGACCCAATCCTTTATCAACATCT
>8382_3975|Hemibrycon.boquiae|COI-5P
ACATGCATTTGTGATAATCTTCTTTATAGTAATACCAGTAATAATTGGTGGCTTCGGAAACTGACTTGTTCCTCTAATGA
TCGGTGCCCCCGATATGGCCTTTCCCCGGATAAATAATATGAGTTTCTGACTCTTGCCCCCATCCTTCCTTCTCCTACTA
GCCTCATCTGGGGTCGAAGCTGGAGCAGGGACAGGTTGGACTGTTTATCCACCACTCGCCGGGAATCTCGCACATGCAGG
GGCTTCTGTAGACCTAACTATCTTCTCACTCCACCTTGCCGGGGTGTCTTCCATTTTAGGGGCAATCAACTTTATTACCA
CTATTATTAATATAAAACCACCAGCCATTTCGCAATATCAAACGCCCTTATTTGTATGAGCTGTTCTAATTACAGCTGTC
CTTCTTCTTCTATCATTACCCGTACTAGCAGCCGCAATTACGATACTCCTAACAGACCGAAATCTCAATACCTCATTCTT
TGATCCTGCGGGAGGGGGGGACCCAATCCTTTATCAACATCT
>8443_3996|Hemibrycon.boquiae|COI-5P
ACATGCGTTTGTGATAATCTTCTTTATAGNGATACCANNAATAATTGGTGGNTTCGGAAACTGACTTGTCCCTCTAATGA
TCGGTGCCCCTGATATGGCCTTTCCCCGGATAAATAATATGAGTTTCTGACTCTTGCCTCCATCCTTCCTTCTCCTACTA
NCCTCATCTGGGGTCGAAGCTGGAGCAGGGACAGGTTGGACTGTTTATCCACCACTCGCCGGAAATCTCGCACATGCAGG
GGCTTCTGTAGACCTAACTATCTTCTCACTCCACCTTGCCGGGGTGTCTTCCATTTTAGGGGCAATCAACTTTATTACCA
CTATTATTAATATGAAACCACCAGCCATTTCGCAATATCAAACGCCCTTATTTGTATGAGCTGTTCTAATTACAGCTGTC
CTTCTTCTTCTATCACTCCCCGTACTAGCAGCCGGAATTACGATACTCCTAACAGACCGAAATCTCAATACCTCATTCTT
TGATCCTGCAGGAGGAGGGGACCCAATCCTTTATCAACANNN
>8425_3983|Hemibrycon.boquiae|COI-5P
ACATGCGTTTGTGATAATCTTCTTTATAGTGATACCAGTAATAATTGGTGGCTTCGGAAACTGACTTGTCCCTCTAATGA
TCGGTGCCCCTGATATGGCCTTTCCCCGGATAAATAATATGAGTTTCTGACTCTTGCCTCCATCCTTCCTTCTCCTACTA
GCCTCATCTGGGGTCGAAGCTGGAGCAGGGACAGGTTGGACTGTTTATCCACCACTCGCCGGAAATCTCGCACATGCAGG
GGCTTCTGTAGACCTAACTATCTTCTCACTCCACCTTGCCGGGGTGTCTTCCATTTTAGGGGCAATCAACTTTATTACCA
CTATTATCAATATAAAACCACCAGCCATTTCGCAATATCAAACGCCCTTATTTGTATGAGCTGTTCTAATTACAGCTGTC
CTTCTTCTTCTATCACTCCCCGTACTAGCAGCCGGAATTACGATACTCCTAACAGACCGAAATCTCAATACCTCATTCTT
TGATCCTGCAGGAGGAGGGGACCCAATCCTTTATCAACANNN
>8913_4885|Hemibrycon.antioquiae|COI-5P
ACATGCGTTTGTGATAATCTTCTTTATAGTGATACCAGTAATAATTGGTGGCTTCGGAAACTGACTTGTTCCTCTGATGA
TCGGTGCCCCTGACATGGCCTTTCCCCGGATAAATAATATAAGTTTCTGACTCTTACCCCCATCCTTCCTTCTCCTACTA
GCCTCCTCCGGGGTCGAAGCTGGAGCAGGGACAGGTTGGACTGTCTATCCACCACTTGCCGGAAATCTCGCACATGCAGG
GGCTTCTGTAGACCTAACTATTTTCTCACTCCACCTTGCCGGGGTATCTTCTATTTTAGGGGCAATCAACTTTATTACCA
CTATTATTAACATAAAACCGCCAGCCATTTCGCAATATCAAACGCCCTTATTTGTATGAGCTGTTCTAATTACAGCTGTC
CTTCTTCTTCTATCACTCCCCGTGCTAGCAGCCGGAATCACAATACTCCTAACAGACCGAAATCTCAATACCTCATTCTT
TGACCCTGCAGGAGGGGGAGACCCAATCCTTTATCAACATNN
>8923_4942|Hemibrycon.antioquiae|COI-5P
ACATGCGTTTGTGATAATCTTCTTTATAGTGATACCAGTAATAATTGGTGGCTTCGGAAACTGACTTGTTCCTCTGATGA
TCGGTGCCCCTGACATGGCCTTTCCCCGGATAAATAATATAAGTTTCTGACTCTTACCCCCATCCTTCCTTCTCCTACTA
GCCTCCTCCGGGGTCGAAGCTGGAGCAGGGACAGGTTGGACTGTCTATCCACCACTTGCCGGAAATCTCGCACATGCAGG
GGCTTCTGTAGACCTAACTATTTTCTCACTCCACCTTGCCGGGGTATCTTCTATTTTAGGGGCAATCAACTTTATTACCA
CTATTATTAACATAAAACCGCCAGCCATTTCGCAATATCAAACGCCCTTATTTGTATGAGCTGTTCTAATTACAGCTGTC
CTTCTTCTTCTATCACTCCCCGTGCTAGCAGCCGGAATCACAATACTCCTAACAGACCGAAATCTCAATACCTCATTCTT
TGACCCTGCAGGAGGGGGAGACCCAATCCTTTATCAACATCT
>8925_4942|Hemibrycon.antioquiae|COI-5P
ACATGCGTTTGTGATAATCTTCTTTATAGTGATACCAGTAATAATTGGTGGCTTCGGAAACTGACTTGTTCCTCTGATGA
TCGGTGCCCCTGACATGGCCTTTCCCCGGATAAATAATATAAGTTTCTGACTCTTACCCCCATCCTTCCTTCTCCTACTA
GCCTCCTCCGGGGTCGAAGCTGGAGCAGGGACAGGTTGGACTGTCTATCCACCACTTGCCGGAAATCTCGCACATGCAGG
GGCTTCTGTAGACCTAACTATTTTCTCACTCCACCTTGCCGGGGTATCTTCTATTTTAGGGGCAATCAACTTTATTACCA
CTATTATTAACATAAAACCGCCAGCCATTTCGCAATATCAAACGCCCTTATTTGTATGAGCTGTTCTAATTACAGCTGTC
CTTCTTCTTCTATCACTCCCCGTGCTAGCAGCCGGAATCACAATACTCCTAACAGACCGAAATCTCAATACCTCATTCTT
TGACCCTGCAGGAGGGGGAGACCCAATCCTTTATCAACANNN
>8928_4938|Hemibrycon.sp|COI-5P
ACATGCGTTTGTGATAATCTTCTTTATAGTGATACCAGTAATAATTGGTGGCTTCGGAAACTGACTTGTTCCTCTGATGA
TCGGTGCCCCTGACATGGCCTTTCCCCGGATAAATAATATAAGTTTCTGACTCTTACCCCCATCCTTCCTTCTCCTACTA
GCCTCCTCCGGGGTCGAAGCTGGAGCAGGGACAGGTTGGACTGTCTATCCACCACTTGCCGGAAATCTCGCACATGCAGG
GGCTTCTGTAGACCTAACTATTTTCTCACTCCACCTTGCCGGGGTATCTTCTATTTTAGGGGCAATCAACTTTATTACCA
CTATTATTAACATAAAACCGCCAGCCATTTCGCAATATCAAACGCCCTTATTTGTATGAGCTGTTCTAATTACAGCTGTC
CTTCTTCTTCTATCACTCCCCGTGCTAGCAGCCGGAATCACAATACTCCTAACAGACCGAAATCTCAATACCTCATTCTT
TGACCCTGCAGGAGGGGGAGACCCAATCCTTTATCAACATCT
>8911_4885|Hemibrycon.antioquiae|COI-5P
ACATGCGTTTGTGATAATCTTCTTTATAGTGATACCAGTAATAATTGGTGGCTTCGGAAACTGACTTGTTCCTCTAATGA
TCGGTGCCCCTGACATGGCCTTTCCCCGGATAAATAATATAAGTTTCTGACTCTTACCCCCATCCTTCCTTCTCCTACTA
GCCTCCTCCGGGGTCGAAGCTGGAGCAGGGACAGGTTGGACTGTCTATCCACCACTTGCCGGAAATCTCGCACATGCAGG
GGCTTCTGTAGACCTAACTATTTTCTCACTCCACCTTGCCGGGGTATCTTCTATTTTAGGGGCAATCAACTTTATTACCA
CTATTATTAACATAAAACCGCCAGCCATTTCGCAATATCAAACGCCCTTATTTGTATGAGCTGTTCTAATTACAGCTGTC
CTTCTTCTTCTATCACTCCCCGTGCTAGCAGCCGGAATCACAATACTCCTAACAGACCGAAATCTCAATACCTCATTCTT
TGACCCTGCAGGAGGGGGAGACCCAATCCTTTATCAACATCT
>8848_4819|Hemibrycon.raqueliae|COI-5P
ACATGCGTTTGTGATAATCTTCTTTATAGTGATACCAGTAATAATTGGTGGCTTCGGAAACTGACTTGTTCCTCTGATGA
TCGGTGCCCCTGACATGGCCTTTCCCCGGATAAATAATATAAGTTTCTGACTCTTACCCCCATCCTTCCTTCTCCTACTA
GCCTCCTCCGGGGTCGAAGCTGGAGCAGGGACAGGTTGGACTGTCTATCCACCACTTGCCGGAAATCTCGCACATGCAGG
GGCTTCTGTAGACCTAACTATTTTCTCACTCCACCTTGCCGGGGTATCTTCTATTTTAGGGGCAATCAACTTTATTACCA
CTATTATTAACATAAAACCGCCAGCCATTTCGCAATATCAAACGCCCTTATTTGTATGAGCTGTTCTAATTACAGCTGTC
CTTCTTCTTCTATCACTCCCCGTGCTAGCAGCCGGAATCACAATACTCCTAACAGACCGAAATCTCAATACCTCATTCTT
TGACCCTGCAGGAGGGGGAGACCCAATCCTTTATCAACATCT
>8850_4819|Hemibrycon.raqueliae|COI-5P
ACATGCGTTTGTGATAATCTTCTTTATAGTGATACCAGTAATAATTGGTGGCTTCGGAAACTGACTTGTTCCTCTGATGA
TCGGTGCCCCTGACATGGCCTTTCCCCGGATAAATAATATAAGTTTCTGACTCTTACCCCCATCCTTCCTTCTCCTACTA
GCCTCCTCCGGGGTCGAAGCTGGAGCAGGGACAGGTTGGACTGTCTATCCACCACTTGCCGGAAATCTCGCACATGCAGG
GGCTTCTGTAGACCTAACTATTTTCTCACTCCACCTTGCCGGGGTATCTTCTATTTTAGGGGCAATCAACTTTATTACCA
CTATTATTAACATAAAACCGCCAGCCATTTCGCAATATCAAACGCCCTTATTTGTATGAGCTGTTCTAATTACAGCTGTC
CTTCTTCTTCTATCACTCCCCGTGCTAGCAGCCGGAATCACAATACTCCTAACAGACCGAAATCTCAATACCTCATTCTT
TGACCCTGCAGGAGNNNNNNNNNNNNNNNNNNNNNNNNNNNN
>7490_2286|Hemibrycon.sp|COI-5P
TCATGCATTTGTGATAATCTTCTTTATAGTGATACCAGTAATAATTGGTGGCTTCGGAAACTGACTTGTTCCTCTGATGA
TCGGTGCCCCTGACATGGCCTTTCCCCGGATAAATAATATAAGTTTCTGACTCTTACCCCCATCCTTCCTTCTCCTACTA
GCCTCCTCCGGGGTCGAAGCTGGAGCAGGGACAGGTTGGACTGTCTATCCACCACTTGCCGGAAATCTCGCACATGCAGG
GGCTTCTGTAGACCTAACTATTTTCTCACTCCACCTTGCCGGGGTATCTTCTATTTTAGGGGCAATCAACTTTATTACCA
CTATTATTAACATAAAACCGCCAGCCATTTCGCAATATCAAACGCCCTTATTTGTATGAGCTGTTCTAATTACAGCTGTC
CTTCTTCTTCTATCACTCCCCGTGCTAGCAGCCGGAATCACAATACTCCTAACAGACCGAAATCTCAATACCTCATTCTT
TGACCCTGCAGGAGGGGGAGACCCAATCCTTTATCAACATCT
>8924_4942|Hemibrycon.antioquiae|COI-5P
ACATGCGTTTGTGATAATCTTCTTTATAGTGATACCAGTAATAATTGGTGGCTTCGGAAACTGACTTGTTCCTCTGATGA
TCGGTGCCCCTGACATGGCCTTTCCCCGGATAAATAATATAAGTTTCTGACTCTTACCCCCATCCTTCCTTCTCCTACTA
GCCTCCTCCGGGGTCGAAGCTGGAGCAGGGACAGGTTGGACTGTCTATCCACCACTTGCCGGAAATCTCGCACATGCAGG
GGCTTCTGTAGACCTAACTATTTTCTCACTCCACCTTGCCGGGGTATCTTCTATTTTAGGGGCGATCAACTTTATTACCA
CTATTATTAACATAAAACCGCCAGCCATTTCGCAATATCAAACGCCCTTATTTGTATGAGCTGTTCTAATTACAGCTGTC
CTTCTTCTTCTATCACTCCCCGTGCTAGCAGCCGGAATCACAATACTCCTAACAGACCGAAATCTCAACACCTCATTCTT
TGACCCTGCAGGAGGGGGAGACCCAATCCTTTATCAACATCT
>8891_4858|Hemibrycon.sp|COI-5P
ACATGCGTTTGTGATAATCTTCTTTATAGTAATACCAGTAATAATTGGTGGCTTCGGAAACTGACTTGTTCCTCTGATGA
TCGGTGCCCCTGACATGGCCTTTCCCCGGATAAATAATATAAGTTTCTGACTCCTACCCCCATCCTTCCTTCTCCTACTA
GCCTCCTCCGGGGTCGAAGCTGGGGCAGGAACAGGTTGAACTGTCTATCCACCACTTGCCGGAAATCTCGCACATGCAGG
GGCTTCTGTAGACCTAACTATTTTCTCACTCCACCTTGCTGGGGTATCTTCCATTTTAGGGGCAATCAACTTTATTACCA
CTATTATTAACATAAAACCGCCAGCCATTTCGCAATATCAAACGCCCTTATTTGTATGAGCTGTTCTAATTACAGCTGTC
CTTCTTCTTCTATCACTCCCCGTGCTAGCAGCCGGAATTACGATACTCCTAACAGACCGAAATCTCAACACCTCATTCTT
TGATCCTGCAGGAGGGGGAGACCCAATCCTTTATCAACATCT
>5128C_5128|Hemibrycon.sp|COI-5P
ACATGCATTTGTAATAATCTTCTTTATAGTAATGCCAGTAATAATTGGCGGCTTCGGAAACTGACTTGTTCCCCTAATAA
TTGGTGCTCCTGACATAGCCTTCCCCCGGATAAACAACATGAGTTTCTGACTCTTGCCACCGTCCTTCCTTCTCCTACTA
GCCTCATCTGGGGTTGAAGCCGGAGCAGGAACCGGTTGAACTGTTTATCCACCACTTGCCGGGAACCTCGCACATGCAGG
GGCTTCTGTAGACCTAACTATTTTTTCACTCCATCTTGCCGGAGTATCTTCCATTTTAGGAGCAATCAACTTTATTACTA
CTATTATTAACATAAAACCGCCAGCCATTTCACAATATCAGACGCCCTTATTTGTCTGGGCTGTTTTAATCACAGCTGTT
CTTCTTCTCCTATCCCTCCCTGTACTAGCAGCCGGAATTACAATGCTCTTAACAGACCGAAACCTTAATACCTCATTCTT
TGACCCCGCAGGAGGAGGAGACCCGATCCTCTATCAGCATNN
>5299A_5299|Hemibrycon.caucanus|COI-5P
ACATGCATTTGTAATAATCTTCTTTATAGTAATGCCAGTAATAATTGGCGGCTTCGGAAACTGACTTGTTCCCCTAATAA
TTGGTGCTCCTGACATAGCCTTCCCCCGGATAAACAACATGAGTTTCTGACTCTTGCCACCGTCCTTCCTTCTCCTACTA
GCCTCATCTGGGGTTGAAGCCGGAGCAGGAACCGGTTGAACTGTTTATCCACCACTTGCCGGGAACCTCGCACATGCAGG
GGCTTCTGTAGACCTAACTATTTTTTCACTCCATCTTGCCGGAGTATCTTCCATTTTAGGAGCAATCAACTTTATTACTA
CTATTATTAACATAAAACCGCCAGCCATTTCACAATATCAGACGCCCTTATTTGTCTGGGCTGTTTTAATCACAGCTGTT
CTTCTTCTCCTATCCCTCCCTGTACTAGCAGCCGGAATTACAATGCTCTTAACAGACCGAAACCTTAATACCTCATTCTT
TGACCCCGCAGGAGGAGGAGACCCGATCCTCTATCAGCANNN
>5626D_5626|Hemibrycon.caucanus|COI-5P
ACATGCATTTGTAATAATCTTCTTTATAGTAATGCCAGTAATAATTGGCGGCTTCGGAAACTGACTTGTTCCCCTAATAA
TTGGTGCTCCTGACATAGCCTTCCCCCGGATAAACAACATGAGTTTCTGACTCTTGCCACCGTCCTTCCTTCTCCTACTA
GCCTCATCTGGGGTTGAAGCCGGAGCAGGAACCGGTTGAACTGTTTATCCACCACTTGCCGGGAACCTCGCACATGCAGG
GGCTTCTGTAGACCTAACTATTTTTTCACTCCATCTTGCCGGAGTATCTTCCATTTTAGGAGCAATCAACTTTATTACTA
CTATTATTAACATAAAACCGCCAGCCATTTCACAATATCAGACGCCCTTATTTGTCTGGGCTGTTTTAATCACAGCTGTT
CTTCTTCTCCTATCCCTCCCTGTACTAGCAGCCGGAATTACAATGCTCTTAACAGACCGAAACCTTAATACCTCATTCTT
TGACCCCGCAGGAGGAGGAGACCCGATCCTCTATCAGCATCT
>5626A_5626|Hemibrycon.caucanus|COI-5P
ACATGCATTTGTAATAATCTTCTTTATAGTAATGCCAGTAATAATTGGCGGCTTCGGAAACTGACTTGTTCCCCTAATAA
TTGGTGCTCCTGACATAGCCTTCCCCCGGATAAACAACATGAGTTTCTGACTCTTGCCACCGTCCTTCCTTCTCCTACTA
GCCTCATCTGGGGTTGAAGCCGGAGCAGGAACCGGTTGAACTGTTTATCCACCACTTGCCGGGAACCTCGCACATGCAGG
GGCTTCTGTAGACCTAACTATTTTTTCACTCCATCTTGCCGGAGTATCTTCCATTTTAGGAGCAATCAACTTTATTACTA
CTATTATTAACATAAAACCGCCAGCCATTTCACAATATCAGACGCCCTTATTTGTCTGGGCTGTTTTAATCACAGCTGTT
CTTCTTCTCCTATCCCTCCCTGTACTAGCAGCCGGAATTACAATGCTCTTAACAGACCGAAACCTTAATACCTCATTCTT
TGACCCCGCAGGAGGAGGAGACCCGATCCTCTATCAGCATCT
>5626B_5626|Hemibrycon.caucanus|COI-5P
ACATGCATTTGTAATAATCTTCTTTATAGTAATGCCAGTAATAATTGGCGGCTTCGGAAACTGACTTGTTCCCCTAATAA
TTGGTGCTCCTGACATAGCCTTCCCCCGGATAAACAACATGAGTTTCTGACTCTTGCCACCGTCCTTCCTTCTCCTACTA
GCCTCATCTGGGGTTGAAGCCGGAGCAGGAACCGGTTGAACTGTTTATCCACCACTTGCCGGGAACCTCGCACATGCAGG
GGCTTCTGTAGACCTAACTATTTTTTCACTCCATCTTGCCGGAGTATCTTCCATTTTAGGAGCAATCAACTTTATTACTA
CTATTATTAACATAAAACCGCCAGCCATTTCACAATATCAGACGCCCTTATTTGTCTGGGCTGTTTTAATCACAGCTGTT
CTTCTTCTCCTATCCCTCCCTGTACTAGCAGCCGGAATTACAATGCTCTTAACAGACCGAAACCTTAATACCTCATTCTT
TGACCCCGCAGGAGGAGGAGACCCGATCCTCTATCAACATCT
>5128B_5128|Hemibrycon.sp|COI-5P
ACATGCATTTGTAATAATCTTCTTTATAGTAATGCCAGTAATAATTGGCGGCTTCGGAAACTGACTTGTTCCCCTAATAA
TTGGTGCTCCTGACATAGCCTTCCCCCGGATAAACAACATGAGTTTCTGACTCTTGCCACCGTCCTTCCTTCTCCTACTA
GCCTCATCTGGGGTTGAAGCCGGAGCAGGAACCGGTTGAACTGTTTATCCACCACTTGCCGGGAACCTCGCACATGCAGG
GGCTTCTGTAGACCTAACTATTTTTTCACTCCATCTTGCCGGAGTATCTTCCATTTTAGGAGCAATCAACTTTATTACTA
CTATTATTAACATAAAACCGCCAGCCATTTCACAATATCAGACGCCCTTATTTGTCTGGGCTGTTTTAATCACAGCTGTT
CTTCTTCTCCTATCCCTCCCTGTACTAGCAGCCGGAATTACAATGCTCTTAACAGACCGAAACCTTAATACCTCATTCTT
TGACCCCGCAGGAGGAGGAGACCCGATCCTCTATCAGCATCT
>8052_3639|Hemibrycon.caucanus|COI-5P
ACATGCATTTGTAATAATCTTCTTTATAGTAATGCCAGTAATAATTGGCGGCTTCGGAAACTGACTTGTTCCCCTAATAA
TTGGTGCTCCTGACATAGCCTTCCCCCGGATAAACAACATGAGTTTCTGACTCTTGCCACCGTCCTTCCTTCTCCTACTA
GCCTCATCTGGGGTTGAAGCCGGAGCAGGAACCGGTTGAACTGTTTATCCACCACTTGCCGGGAACCTCGCACATGCAGG
GGCTTCTGTAGACCTAACTATTTTTTCACTCCATCTTGCCGGAGTATCTTCCATTTTAGGAGCAATCAACTTTATTACTA
CTATTATTAACATAAAACCGCCAGCCATTTCACAATATCAGACGCCCTTATTTGTCTGGGCTGTTTTAATCACAGCTGTT
CTTCTTCTCCTATCCCTCCCTGTACTAGCAGCCGGAATTACAATGCTCTTAACAGACCGAAACCTTAATACCTCATTCTT
TGACCCCGCAGGAGGAGGAGACCCGATCCTCTATCAANNNNN
>8070_3788|Hemibrycon.boquiae|COI-5P
ACATGCATTTGTAATAATCTTCTTTATAGTAATGCCAGTAATAATTGGCGGCTTCGGAAACTGACTTGTTCCCCTAATAA
TTGGTGCTCCTGACATAGCCTTCCCCCGGATAAACAACATGAGTTTCTGACTCTTGCCACCGTCCTTCCTTCTCCTACTA
GCCTCATCTGGGGTTGAAGCCGGAGCAGGAACCGGTTGAACTGTTTATCCACCACTTGCCGGGAACCTCGCACATGCAGG
GGCTTCTGTAGACCTAACTATTTTTTCACTCCATCTTGCCGGAGTATCTTCCATTTTAGGAGCAATCAACTTTATTACTA
CTATTATTAACATGAAACCGCCAGCCATTTCACAATATCAGACGCCCTTATTTGTCTGGGCTGTTTTAATCACAGCTGTT
CTTCTTCTCCTATCCCTCCCTGTACTAGCAGCCGGAATTACAATGCTCTTAACAGACCGAAACCTTAATACCTCATTCTT
TGACCCCGCAGGAGGAGGAGACCCGATCCTCTATCAACANNN
>5128A_5128|Hemibrycon.sp|COI-5P
ACATGCATTTGTAATAATCTTCTTTATAGTAATGCCAGTAATAATTGGCGGCTTCGGAAACTGACTTGTTCCCCTAATAA
TTGGTGCTCCTGACATAGCCTTCCCCCGGATAAACAACATGAGTTTCTGACTCTTGCCACCGTCCTTCCTTCTCCTACTA
GCCTCATCTGGGGTTGAAGCCGGAGCAGGAACCGGTTGAACTGTTTATCCACCACTTGCCGGGAACCTCGCACATGCAGG
GGCTTCTGTAGACCTAACTATTTTTTCACTCCATCTTGCCGGAGTATCTTCCATTTTAGGAGCAATCAACTTTATTACTA
CTATTATTAACATAAAACCGCCAGCCATTTCACAATATCAGACGCCCTTATTTGTCTGGGCTGTTTTAATCACAGCTGTT
CTTCTTCTCCTATCCCTCCCTGTACTAGCAGCCGGAATTACAATGCTCTTAACAGACCGAAACCTTAATACCTCATTCTT
TGACCCCGCAGGAGGAGGAGACCCGATCCTCTATCAACATNN
>5884G_5884|Argopleura.magdalenensis|COI-5P
CCATGCATTTGTGATAATTTTCTTTATAGTAATACCCGTAATAATTGGGGGCTTCGGAAATTGACTCATCCCCTTAATGA
TTGGCGCTCCAGATATGGCTTTCCCCCGAATAAATAATATGAGTTTCTGACTTTTACCTCCATCTTTCCTTCTTCTGTTA
GCTTCATCCGGGGTTGAAGCTGGAGCAGGTACAGGTTGAACTGTTTATCCCCCACTTGCCGGAAACCTTGCACATGCAGG
GGCTTCTGTAGACTTAACTATTTTTTCACTTCACCTAGCTGGTGTATCTTCTATTTTAGGAGCAATTAATTTTATTACTA
CTATTATTAACATGAAACCTCCAGCCATTTCACAATATCAAACCCCCTTGTTTGTTTGAGCTGTTTTAATTACAGCCGTA
CTTCTTCTTCTCTCACTCCCAGTGTTGGCAGCCGGGATTACAATGCTCTTAACAGATCGAAATCTCAACACCTCATTCTT
TGATCCTGCAGGAGGAGGAGATCCAATCCTCTACCAACACCT
>7485_2281|Argopleura.magdalenensis|COI-5P
CCATGCATTTGTGATAATTTTCTTTATAGTAATACCCGTAATAATTGGGGGCTTCGGAAATTGACTCATCCCCTTAATGA
TTGGCGCTCCAGATATGGCTTTCCCCCGAATAAATAACATGAGTTTCTGACTTCTACCTCCATCTTTCCTTCTTCTGTTA
GCTTCATCCGGGGTTGAAGCTGGAGCAGGTACAGGTTGAACTGTTTATCCCCCACTTGCCGGAAACCTTGCACATGCAGG
GGCTTCTGTAGACTTAACTATTTTTTCACTTCACCTAGCTGGTGTATCTTCTATTTTAGGAGCAATTAATTTTATTACTA
CTATTATTAACATGAAACCTCCAGCCATTTCACAATATCAAACCCCCTTGTTTGTTTGAGCTGTTTTAATTACAGCCGTA
CTTCTTCTCCTCTCACTCCCAGTGTTGGCAGCCGGGATTACAATGCTCTTAACAGATCGAAATCTCAACACCTCATTCTT
TGATCCTGCAGGAGGAGGAGACCCAATCCTCTACCAACACCT
>5884E_5884|Argopleura.magdalenensis|COI-5P
CCATGCATTTGTGATAATTTTCTTTATAGTAATACCCGTAATAATTGGGGGCTTCGGAAATTGACTCATCCCCTTAATGA
TTGGCGCTCCAGACATGGCCTTCCCCCGAATAAACAATATGAGTTTCTGACTTTTACCTCCATCTTTCCTCCTTCTATTA
GCTTCATCCGGGGTTGAAGCTGGAGCAGGTACAGGTTGAACTGTTTATCCCCCACTTGCCGGAAACCTTGCACATGCGGG
GGCTTCTGTAGACTTAACTATTTTTTCACTTCACCTAGCTGGTGTATCTTCTATTTTAGGAGCAATTAATTTTATTACTA
CTATTATTAACATGAAACCTCCAGCCATTTCACAATATCAAACCCCCTTGTTTGTTTGAGCTGTTTTAATTACAGCCGTA
CTTCTTCTCCTCTCACTCCCAGTGTTGGCAGCCGGGATTACAATGCTCTTAACAGATCGAAATCTCAACACCTCATTCTT
TGATCCTGCAGGAGGAGGAGATCCAATCCTCTACCAACACCT
>8552_3912|Argopleura.magdalenensis|COI-5P
CCATGCATTTGTGATAATTTTCTTTATAGTAATACCCGTAATAATTGGGGGCTTCGGAAATTGACTCATCCCCTTAATGA
TTGGCGCTCCAGACATGGCCTTCCCCCGAATAAACAATATGAGTTTCTGACTTTTACCTCCATCTTTCCTCCTTCTATTA
GCTTCATCCGGGGTTGAAGCTGGAGCAGGTACAGGTTGAACTGTTTATCCCCCACTTGCCGGAAACCTTGCACATGCGGG
GGCTTCTGTAGACTTAACTATTTTTTCACTTCACCTAGCTGGTGTATCTTCTATTTTAGGAGCAATTAATTTTATTACTA
CTATTATTAACATGAAACCTCCAGCCATTTCACAATATCAAACCCCCTTGTTTGTTTGAGCTGTTTTAATTACAGCCGTA
CTTCTTCTCCTCTCACTCCCAGTGTTGGCAGCCGGGATTACAATGCTCTTAACAGATCGAAATCTCAACACCTCATTCTT
TGATCCTGCAGGAGGAGGAGATCCAATCCTCTACCAACACCT
>8543_3931|Argopleura.magdalenensis|COI-5P
CCATGCATTTGTGATAATTTTCTTTATAGTAATACCCGTAATAATTGGGGGCTTCGGAAATTGACTCATCCCCTTAATGA
TTGGCGCTCCAGACATGGCCTTCCCCCGAATAAACAATATGAGTTTCTGACTTTTACCTCCATCTTTCCTCCTTCTATTA
GCTTCATCCGGGGTTGAAGCTGGAGCAGGTACAGGTTGAACTGTTTATCCCCCACTTGCCGGAAACCTTGCACATGCGGG
GGCTTCTGTAGACTTAACTATTTTTTCACTTCACCTAGCTGGTGTATCTTCTATTTTAGGAGCAATTAATTTTATTACTA
CTATTATTAACATGAAACCTCCAGCCATTTCACAATATCAAACCCCCTTGTTTGTTTGAGCTGTTTTAATTACAGCCGTA
CTTCTTCTCCTCTCACTCCCAGTGTTGGCAGCCGGGATTACAATGCTCTTAACAGATCGAAATCTCAACACCTCATTCTT
TGATCCTGCAGGAGGAGGAGATCCAATCCTCTACCAACACCT
>8892_4859|Argopleura.magdalenensis|COI-5P
CCATGCATTTGTGATAATTTTCTTTATAGTAATACCCGTAATAATTGGGGGCTTCGGAAATTGACTCATCCCCTTAATGA
TTGGTGCTCCAGACATGGCTTTCCCCCGAATGAACAATATGAGTTTCTGACTTTTACCTCCATCTTTCCTTCTTCTACTA
GCTTCATCCGGGGTTGAAGCTGGAGCAGGTACAGGTTGAACTGTTTATCCCCCACTTGCCGGAAACCTTGCACATGCAGG
GGCTTCTGTAGACTTAACTATTTTTTCACTTCACCTAGCTGGTGTATCTTCTATTTTAGGAGCAATTAATTTTATCACCA
CTATTATTAACATAAAACCTCCAGCCATTTCACAATACCAAACCCCCTTGTTTGTTTGAGCTGTTTTAATTACAGCCGTA
CTTCTTCTCCTCTCACTCCCAGTGTTGGCAGCCGGAATTACAATGCTCTTAACAGATCGAAATCTTAACACCTCATTCTT
TGATCCTGCAGGAGGAGGGGATCCGATCCTCTACCAACACCT
>8931_4907|Argopleura.magdalenensis|COI-5P
CCATGCATTTGTGATAATTTTCTTTATAGTAATACCCGTAATAATTGGGGGCTTCGGAAATTGACTCATCCCCTTAATGA
TTGGTGCTCCAGACATGGCTTTCCCCCGAATGAACAATATGAGTTTCTGACTTTTACCTCCATCTTTCCTTCTTCTACTA
GCTTCATCCGGGGTTGAAGCTGGAGCAGGTACAGGTTGAACTGTTTATCCCCCACTTGCCGGAAACCTTGCACATGCAGG
GGCTTCTGTAGACTTAACTATTTTTTCACTTCACCTAGCTGGTGTATCTTCTATTTTAGGAGCAATTAATTTTATCACCA
CTATTATTAACATAAAACCTCCAGCCATTTCACAATACCAAACCCCCTTGTTTGTTTGAGCTGTTTTAATTACAGCCGTA
CTTCTTCTCCTCTCACTCCCAGTGTTGGCAGCCGGAATTACAATGCTCTTAACAGATCGAAATCTTAACACCTCATTCTT
TGATCCTGCAGGAGGAGGGGATCCGATCCTCTACCAACACCT
>8902_4876|Argopleura.magdalenensis|COI-5P
CCATGCATTTGTGATAATTTTCTTTATAGTAATACCCGTAATAATTGGGGGCTTCGGAAATTGACTCATCCCCTTAATGA
TTGGTGCTCCAGACATGGCTTTCCCCCGAATGAACAATATGAGTTTCTGACTTTTACCTCCATCTTTCCTTCTTCTACTA
GCTTCATCCGGGGTTGAAGCTGGAGCAGGTACAGGTTGAACTGTTTATCCCCCACTTGCCGGAAACCTTGCACATGCAGG
GGCTTCTGTAGACTTAACTATTTTTTCACTTCACCTAGCTGGTGTATCTTCTATTTTAGGAGCAATTAATTTTATCACCA
CTATTATTAACATGAAACCTCCAGCCATTTCACAATACCAAACCCCCTTGTTTGTTTGAGCTGTTTTAATTACAGCCGTA
CTTCTTCTCCTCTCACTCCCAGTGTTGGCAGCCGGAATTACAATGCTCTTAACAGATCGAAATCTTAACACCTCATTCTT
TGATCCTGCAGGAGGAGGGGATCCGATCCTCTACCAACACCT
>5457A_5457|Gephyrocharax.melanocheir|COI-5P
ACATGCATTTGTAATAATTTTCTTTATAGTAATGCCCGTAATAATTGGAGGCTTTGGGAACTGACTTGTTCCCCTAATGA
TCGGAGCCCCCGACATGGCCTTTCCACGAATAAACAACATAAGTTTTTGACTCTTACCACCATCTTTCCTCCTACTTCTA
GCCTCTTCTGGGGTTGAAGCTGGAGCAGGAACAGGTTGAACTGTTTATCCCCCACTTGCCGGCAACCTTGCACATGCGGG
AGCTTCTGTAGATTTAACTATTTTCTCACTCCATCTTGCCGGGGTATCTTCTATTTTAGGGGCAATTAATTTTATTACTA
CAATTATTAACATGAAACCCCCAGCCATTTCACAATATCAAACCCCTTTATTTGTATGAGCTGTTTTAATTACAGCTGTT
CTTCTTCTTCTTTCACTCCCAGTATTAGCAGCCGGAATTACAATGCTCCTAACAGATCGAAATCTTAATACCTCCTTCTT
TGACCCTGCAGGGGGAGGAGACCCAATTCTCTACCAACACCT
>8869_4847|Creagrutus.affinis|COI-5P
ACATGCATTTGTTATAATCTTCTTTATAGTAATACCAGTAATAATTGGGGGCTTCGGAAATTGACTTATTCCTCTAATAA
TTGGTGCCCCAGACATAGCCTTTCCCCGAATAAATAACATAAGCTTTTGACTTTTACCCCCATCATTCCTCCTTTTACTA
GCCTCATCCGGAGTTGAAGCTGGGGCTGGCACTGGCTGAACTGTTTATCCACCGCTCGCTGGAAACCTAGCACACGCGGG
AGCCTCTGTAGACCTAACCATCTTTTCACTTCACCTTGCTGGGGTATCTTCTATTTTAGGGGCTATCAACTTTATTACTA
CCATTATTAATATAAAACCCCCAGCTATTTCACAATATCAAACACCTTTATTTGTATGAGCTGTTTTAATTACAGCCGTC
CTACTTCTCCTATCACTCCCAGTCCTAGCAGCTGGTATTACAATGCTTCTAACAGACCGAAATCTTAACACCTCANNNNN
NNNNNNNNNNNNNNNNNNNNNNNNNNNNNNNNNNNNNNNNNN
>8870_4847|Creagrutus.affinis|COI-5P
ACATGCATTTGTTATAATCTTCTTTATAGTAATACCAGTAATAATTGGGGGCTTCGGAAATTGACTTATTCCTCTAATAA
TTGGTGCCCCAGACATAGCCTTTCCCCGAATAAATAACATAAGCTTTTGACTTTTACCCCCATCATTCCTCCTTTTACTA
GCCTCATCCGGAGTTGAAGCTGGGGCTGGCACTGGCTGAACTGTTTATCCACCGCTCGCTGGAAACCTAGCACACGCGGG
AGCCTCTGTAGACCTAACCATCTTTTCACTTCACCTTGCTGGGGTATCTTCTATTTTAGGGGCTATCAACTTTATTACTA
CCATTATTAATATAAAACCCCCAGCTATTTCACAATATCAAACACCTTTATTTGTATGAGCTGTTTTAATTACAGCCGTC
CTACTTCTCCTATCACTCCCAGTCCTAGCAGCTGGTATTACAATGCTTCTAACAGACCGAAATCTTAACACCTCANNNNN
NNNNNNNNNNNNNNNNNNNNNNNNNNNNNNNNNNNNNNNNNN
>8935_4892|Creagrutus.brevipinnis|COI-5P
ACATGCATTTGTTATAATCTTCTTTATAGTAATACCAGTAATAATTGGGGGCTTCGGAAATTGACTTATTCCTCTAATAA
TTGGTGCCCCAGACATAGCCTTTCCCCGAATAAATAACATAAGCTTTTGACTTTTACCCCCATCATTCCTCCTTTTACTA
GCCTCATCCGGAGTTGAAGCTGGGGCTGGCACTGGCTGAACTGTTTATCCACCGCTCGCTGGAAACCTAGCACACGCGGG
AGCCTCTGTAGACCTAACCATCTTTTCACTTCACCTTGCTGGGGTATCTTCTATTTTAGGGGCTATCAACTTTATTACTA
CCATTATTAATATAAAACCCCCAGCTATTTCACAATATCAAACACCTTTATTTGTATGAGCTGTTTTAATTACAGCCGTC
CTACTTCTCCTATCACTCCCAGTCCTAGCAGCTGGTATTACAATGCTTCTAACAGACCGAAATCTTAACACCTCATTCTT
TGACCCGGCAGGAGGGGGAGACCCAATCCTTTATCAACATTT
>8458_4245|Creagrutus.brevipinnis|COI-5P
ACATGCATTTGTTATAATCTTCTTTATAGTTATACCAGTAATAATTGGGGGCTTCGGAAATTGACTTATTCCTCTAATAA
TTGGTGCCCCAGACATAGCCTTTCCCCGAATAAATAACATAAGCTTTTGACTTTTACCCCCCTCATTTCTCCTTTTACTA
GCCTCATCCGGAGTTGAAGCTGGAGCCGGTACTGGCTGAACTGTTTATCCACCACTCGCTGGAAACCTAGCACACGCGGG
AGCCTCTGTAGACCTAACCATCTTTTCACTTCACCTTGCTGGGGTATCTTCTATTTTAGGGGCTATCAACTTTATTACTA
CCATTATTAATATAAAACCCCCAGCTATTTCACAATATCAAACACCTTTATTTGTATGAGCTGTTTTAATTACGGCCGTC
CTACTTCTCCTATCACTCCCAGTCCTAGCAGCTGGTATTACAATGCTTCTAACAGACCGAAACCTTAACACCTCATTCTT
TGATCCGGCAGGAGGGGGAGACCCAATCCTTTATCAACATNN
>8548_3911|Creagrutus.brevipinnis|COI-5P
ACATGCATTTGTTATAATCTTCTTTATAGTTATACCAGTAATAATTGGGGGCTTCGGAAATTGACTTATTCCTCTAATAA
TTGGTGCCCCAGACATAGCCTTTCCCCGAATAAATAACATAAGCTTTTGACTTTTACCCCCCTCATTTCTCCTTTTACTA
GCCTCATCCGGAGTTGAAGCTGGAGCCGGTACTGGCTGAACTGTTTATCCACCACTCGCTGGAAACCTAGCACACGCGGG
AGCCTCTGTAGACCTAACCATCTTTTCACTTCACCTTGCTGGGGTATCTTCTATTTTAGGGGCTATCAACTTTATTACTA
CCATTATTAATATAAAACCCCCAGCTATTTCACAATATCAAACACCTTTATTTGTATGAGCTGTTTTAATTACGGCCGTC
CTACTTCTCCTATCACTCCCAGTCCTAGCAGCTGGTATTACAATGCTTCTAACAGACCGAAACCTTAACACCTCATTCTT
TGATCCGGCAGGAGGGGGAGACCCAATCCTTTATCAACATNN
>8539_3926|Creagrutus.brevipinnis|COI-5P
ACATGCATTTGTTATAATCTTCTTTATAGTTATACCAGTAATAATTGGGGGCTTCGGAAATTGACTTATTCCTCTAATAA
TTGGTGCCCCAGACATAGCCTTTCCCCGAATAAATAACATAAGCTTTTGACTTTTACCCCCCTCATTTCTCCTTTTACTA
GCCTCATCCGGAGTTGAAGCTGGAGCCGGTACTGGCTGAACTGTTTATCCACCACTCGCTGGAAACCTAGCACACGCGGG
AGCCTCTGTAGACCTAACCATCTTTTCACTTCACCTTGCTGGGGTATCTTCTATTTTAGGGGCTATCAACTTTATTACTA
CCATTATTAATATAAAACCCCCAGCTATTTCACAATATCAAACACCTTTATTTGTATGAGCTGTTTTAATTACGGCCGTC
CTACTTCTCCTATCACTCCCAGTCCTAGCAGCTGGTATTACAATGCTTCTAACAGACCGAAACCTTAACACCTCATTCTT
TGATCCGGCAGGAGGGGGAGACCCAATCCTTTATCAACATTT
>8506_3921|Creagrutus.sp|COI-5P
ACATGCATTTGTTATAATCTTCTTTATAGTTATACCAGTAATAATTGGGGGCTTCGGAAATTGACTTATTCCTCTAATAA
TTGGTGCCCCAGACATAGCCTTTCCCCGAATAAATAACATAAGCTTTTGACTTTTACCCCCCTCATTTCTCCTTTTACTA
GCCTCATCCGGAGTTGAAGCTGGAGCCGGTACTGGCTGAACTGTTTATCCACCACTCGCTGGAAACCTAGCACACGCGGG
AGCCTCTGTAGACCTAACCATCTTTTCACTTCACCTTGCTGGGGTATCTTCTATTTTAGGGGCTATCAACTTTATTACTA
CCATTATTAATATAAAACCCCCAGCTATTTCACAATATCAAACACCTTTATTTGTATGAGCTGTTTTAATTACGGCCGTC
CTACTTCTCCTATCACTCCCAGTCCTAGCAGCTGGTATTACAATGCTTCTAACAGACCGAAACCTTAACACCTCATTCTT
TGATCCGGCAGGAGGGGGAGACCCAATCCTTTATCAACATTT
>8505_3921|Creagrutus.sp|COI-5P
ACATGCATTTGTTATAATCTTCTTTATAGTTATACCAGTAATAATTGGGGGCTTCGGAAATTGACTTATTCCTCTAATAA
TTGGTGCCCCAGACATAGCCTTTCCCCGAATAAATAACATAAGCTTTTGACTTTTACCCCCCTCATTTCTCCTTTTACTA
GCCTCATCCGGAGTTGAAGCTGGAGCCGGTACTGGCTGAACTGTTTATCCACCACTCGCTGGAAACCTAGCACACGCGGG
AGCCTCTGTAGACCTAACCATCTTTTCACTTCACCTTGCTGGGGTATCTTCTATTTTAGGGGCTATCAACTTTATTACTA
CCATTATTAATATAAAACCCCCAGCTATTTCACAATATCAAACACCTTTATTTGTATGAGCTGTTTTAATTACGGCCGTC
CTACTTCTCCTATCACTCCCAGTCCTAGCAGCTGGTATTACAATGCTTCTAACAGACCGAAACCTTAACACCTCATTCTT
TGATCCGGCAGGAGGGGGAGACCCAATCCTTTATCAACATTT
>8433_3981|Creagrutus.sp|COI-5P
ACATGCATTTGTTATAATCTTCTTTATAGTTATACCAGTAATAATTGGGGGCTTCGGAAATTGACTTATTCCTCTAATAA
TTGGTGCCCCAGACATAGCCTTTCCCCGAATAAATAACATAAGCTTTTGACTTTTACCCCCCTCATTTCTCCTTTTACTA
GCCTCATCCGGAGTTGAAGCTGGAGCCGGTACTGGCTGAACTGTTTATCCACCACTCGCTGGAAACCTAGCACACGCGGG
AGCCTCTGTAGACCTAACCATCTTTTCACTTCACCTTGCTGGGGTATCTTCTATTTTAGGGGCTATCAACTTTATTACTA
CCATTATTAATATAAAACCCCCAGCTATTTCACAATATCAAACACCTTTATTTGTATGAGCTGTTTTAATTACGGCCGTC
CTACTTCTCCTATCACTCCCAGTCCTAGCAGCTGGTATTACAATGCTTCTAACAGACCGAAACCTTAACACCTCATTCTT
TGATCCGGCAGGAGGGGGAGACCCAATCCTTTATCAACATTT
>7487_2283|Creagrutus.magdalenae|COI-5P
ACATGCATTTGTTATAATCTTCTTTATAGTAATACCAGTAATAATTGGGGGCTTCGGAAATTGACTTATTCCTCTAATAA
TTGGTGCCCCAGACATAGCCTTTCCCCGAATAAATAACATAAGCTTTTGACTTTTACCCCCATCATTCCTCCTTTTACTA
GCCTCATCCGGAGTTGAAGCTGGGGCTGGCACTGGCTGAACTGTTTATCCACCGCTCGCTGGAAACCTAGCACACGCGGG
AGCCTCTGTAGACCTAACCATCTTTTCACTTCACCTTGCTGGGGTATCTTCTATTTTAGGGGCTATCAACTTTATTACTA
CCATTATTAATATAAAACCCCCAGCTATTTCACAATATCAAACACCTTTATTTGTATGAGCTGTTTTAATTACAGCCGTC
CTACTTCTCCTATCACTCCCAGTCCTAGCAGCTGGTATTACAATGCTTCTAACAGACCGAAATCTTAACACCTCATTCTT
TGACCCGGCAGGAGGGGGAGACCCAATCCTTTATCAACATTT
>8202_3657|Creagrutus.magdalenae|COI-5P
ACATGCATTTGTTATAATCTTCTTTATAGTAATACCAGTAATAATCGGGGGCTTCGGAAACTGACTTATCCCTCTAATAA
TCGGCGCCCCAGATATAGCCTTCCCACGAATAAACAACATAAGCTTTTGACTTTTACCCCCATCATTCCTCCTTTTACTA
GCCTCATCCGGAGTTGAAGCTGGGGCAGGAACAGGTTGAACTGTTTATCCACCTCTCGCTGGAAACCTCGCACACGCAGG
AGCCTCTGTAGACCTGACCATCTTTTCACTTCACCTTGCTGGGGTATCTTCTATTTTAGGTGCCATCAACTTTATTACTA
CCATTATTAATATAAAACCCCCAGCTATTTCACAATATCAAACACCTTTATTTGTCTGAGCTGTTTTAATTACGGCTGTT
CTCCTTCTCTTATCACTTCCAGTTTTAGCAGCTGGAATTACAATACTTCTAACAGACCGAAACCTTAACACCTCATTCTT
TGACCCAGCAGGAGGGGGAGACCCAATCCTTTATCAACATCT
>8210_3657|Creagrutus.magdalenae|COI-5P
ACATGCATTTGTTATAATCTTCTTTATAGTAATACCAGTAATAATCGGGGGCTTCGGAAACTGACTTATCCCTCTAATAA
TCGGCGCCCCAGATATAGCCTTCCCACGAATAAACAACATAAGCTTTTGACTTTTACCCCCATCATTCCTCCTTTTACTA
GCCTCATCCGGAGTTGAAGCTGGGGCAGGAACAGGTTGAACTGTTTATCCACCTCTCGCTGGAAACCTCGCACACGCAGG
AGCCTCTGTAGACCTGACCATCTTTTCACTTCACCTTGCTGGGGTATCTTCTATTTTAGGTGCCATCAACTTTATTACTA
CCATTATTAATATAAAACCCCCAGCTATTTCGCAATATCAAACACCTTTATTTGTCTGAGCTGTTTTAATTACGGCTGTT
CTCCTTCTCTTATCACTTCCAGTTTTAGCAGCTGGAATTACAATACTTCTAACAGACCGAAACCTTAACACCTCATTCTT
TGACCCAGCAGGAGGGGGAGACCCAATCCTTTATCAACATCT
>8208_3657|Creagrutus.magdalenae|COI-5P
ACATGCATTTGTTATAATCTTCTTTATAGTAATACCAGTAATAATCGGGGGCTTCGGAAACTGACTTATCCCTCTAATAA
TCGGCGCCCCAGATATAGCCTTCCCACGAATAAACAACATAAGCTTTTGACTTTTACCCCCATCATTCCTCCTTTTACTA
GCCTCATCCGGAGTTGAAGCTGGGGCAGGAACAGGTTGAACTGTTTATCCACCTCTCGCTGGAAACCTCGCACACGCAGG
AGCCTCTGTAGACCTGACCATCTTTTCACTTCACCTTGCTGGGGTATCTTCTATTTTAGGTGCCATCAACTTTATTACTA
CCATTATTAATATAAAACCCCCAGCTATTTCGCAATATCAAACACCTTTATTTGTCTGAGCTGTTTTAATTACGGCTGTT
CTCCTTCTCTTATCACTTCCAGTTTTAGCAGCTGGAATTACAATACTTCTAACAGACCGAAACCTTAACACCTCATTCTT
TGACCCAGCAGGAGGGGGAGACCCAATCCTTTATCAACATCT
>8212_3657|Creagrutus.magdalenae|COI-5P
ACATGCATTTGTTATAATCTTCTTTATAGTAATACCAGTAATAATCGGGGGCTTCGGAAACTGACTTATCCCTCTAATAA
TCGGCGCCCCAGATATAGCCTTCCCACGAATAAACAACATAAGCTTTTGACTTTTACCCCCATCATTCCTCCTTTTACTA
GCCTCATCCGGAGTTGAAGCTGGGGCAGGAACAGGTTGAACTGTTTATCCACCTCTCGCTGGAAACCTCGCACACGCAGG
AGCCTCTGTAGACCTGACCATCTTTTCACTTCACCTTGCTGGGGTATCTTCTATTTTAGGTGCCATCAACTTTATTACTA
CCATTATTAATATAAAACCCCCAGCTATTTCGCAATATCAAACACCTTTATTTGTCTGAGCTGTTTTAATTACGGCTGTT
CTCCTTCTCTTATCACTTCCAGTTTTAGCAGCTGGAATTACAATACTTCTAACAGACCGAAACCTTAACACCTCATTCTT
TGACCCAGCAGGAGGGGGAGACCCAATCCTTTATCAACATCT
>8072_3646|Creagrutus.brevipinnis|COI-5P
ACATGCATTTGTTATAATCTTCTTTATAGTAATACCAGTAATAATCGGGGGCTTCGGAAACTGACTTATCCCTCTAATAA
TCGGCGCCCCAGATATAGCCTTCCCACGAATAAACAACATAAGCTTTTGACTTTTACCCCCATCATTCCTCCTTTTACTA
GCCTCATCCGGAGTTGAAGCTGGGGCAGGAACAGGTTGAACTGTTTATCCACCTCTCGCTGGAAACCTCGCACACGCAGG
AGCCTCTGTAGACCTGACCATCTTTTCACTTCACCTTGCTGGGGTATCTTCTATTTTAGGTGCCATCAACTTTATTACTA
CCATTATTAATATAAAACCCCCAGCTATTTCGCAATATCAAACACCTTTATTTGTCTGAGCTGTTTTAATTACGGCTGTT
CTCCTTCTCTTATCACTTCCAGTTTTAGCAGCTGGAATTACAATACTTCTAACAGACCGAAACCTTAACACCTCATTCTT
TGACCCAGCAGGAGGGGGAGACCCAATCCTTTATCAACATCT
>8206_3657|Creagrutus.magdalenae|COI-5P
ACATGCATTTGTTATAATCTTCTTTATAGTAATACCAGTGATAATCGGGGGCTTCGGAAACTGACTTATCCCTCTAATAA
TCGGCGCCCCAGATATAGCCTTCCCACGAATAAACAACATAAGCTTTTGACTTTTACCCCCATCATTCCTCCTTTTACTA
GCCTCATCCGGAGTTGAAGCTGGAGCAGGAACAGGTTGAACTGTTTATCCACCTCTCGCTGGAAACCTCGCACACGCAGG
AGCCTCTGTAGACCTGACCATCTTTTCACTTCACCTTGCTGGGGTATCTTCTATTTTAGGTGCCATCAACTTTATTACTA
CCATTATTAATATAAAACCCCCAGCTATTTCGCAATATCAAACACCTTTATTTGTCTGAGCTGTTTTAATTACGGCTGTT
CTCCTTCTTTTATCACTTCCAGTTTTAGCAGCTGGAATTACAATACTTCTAACAGACCGAAACCTTAACACCTCATTCTT
TGACCCAGCAGGAGGGGGAGACCCAATCCTTTATCAACATCT
>8207_3657|Creagrutus.magdalenae|COI-5P
ACATGCATTTGTTATAATCTTCTTTATAGTAATACCAGTAATAATCGGGGGCTTCGGAAACTGACTTATCCCTCTAATAA
TCGGCGCCCCAGATATAGCCTTCCCACGAATAAACAACATAAGCTTTTGACTTTTACCCCCATCATTCCTCCTTTTACTA
GCCTCATCCGGAGTTGAAGCTGGAGCAGGAACAGGTTGAACTGTCTATCCACCTCTCGCTGGAAACCTCGCACACGCAGG
AGCCTCTGTAGACCTGACCATCTTTTCACTTCACCTTGCTGGGGTATCTTCTATTTTAGGTGCCATCAACTTTATTACTA
CCATTATTAATATAAAACCCCCAGCTATTTCGCAATATCAAACACCTTTATTTGTCTGAGCTGTTTTAATTACGGCTGTT
CTCCTTCTCTTATCACTTCCAGTTTTAGCAGCTGGAATTACAATACTTCTAACAGACCGAAACCTTAACACCTCATTCTT
TGACCCAGCAGGAGGGGGAGACCCAATCCTTTATCAACATCT
>8203_3657|Creagrutus.magdalenae|COI-5P
ACATGCATTTGTTATAATCTTCTTTATAGTAATACCAGTGATAATCGGGGGCTTCGGAAACTGACTTATCCCTCTAATAA
TCGGCGCCCCAGATATAGCCTTCCCACGAATAAACAACATAAGCTTTTGACTTTTACCCCCATCATTCCTCCTTTTACTA
GCCTCATCCGGAGTTGAAGCTGGAGCAGGAACAGGTTGAACTGTTTATCCACCTCTCGCTGGAAACCTCGCACACGCAGG
AGCCTCTGTAGACCTGACCATCTTTTCACTTCACCTTGCTGGGGTATCTTCTATTTTAGGTGCCATCAACTTTATTACTA
CCATTATTAATATAAAACCCCCAGCTATTTCGCAATATCAAACACCTTTATTTGTCTGAGCTGTTTTAATTACGGCTGTT
CTCCTTCTCTTATCACTTCCAGTTTTAGCAGCTGGAATTACAATACTTCTAACAGACCGAAACCTTAACACCTCATTCTT
TGACCCAGCAGGAGGGGGAGACCCAATCCTTTATCAACATCT
>8205_3657|Creagrutus.magdalenae|COI-5P
ACATGCATTTGTTATAATCTTCTTTATAGTAATACCAGTAATAATCGGGGGCTTCGGAAACTGACTTATCCCTCTAATAA
TCGGCGCCCCAGATATAGCCTTCCCACGAATAAACAACATAAGCTTTTGACTTTTACCCCCATCATTCCTCCTTTTACTA
GCCTCATCCGGAGTTGAAGCTGGAGCAGGAACAGGTTGAACTGTTTATCCGCCTCTCGCTGGAAACCTCGCACACGCAGG
AGCCTCTGTAGACCTGACCATCTTTTCACTTCACCTTGCTGGGGTATCTTCTATTTTAGGTGCCATCAACTTTATTACTA
CCATTATTAATATAAAACCCCCAGCTATTTCGCAATATCAAACACCCTTATTTGTCTGAGCTGTTTTAATTACGGCTGTT
CTCCTTCTCTTATCACTTCCAGTTTTAGCAGCTGGAATTACAATACTTCTAACAGACCGAAACCTTAACACCTCATTCTT
TGACCCAGCAGGAGGGGGAGACCCAATCCTTTATCAACATTT
>8200_3657|Creagrutus.magdalenae|COI-5P
ACATGCATTTGTTATAATCTTCTTTATAGTAATACCAGTAATAATTGGGGGCTTCGGAAACTGACTTATCCCTCTAATAA
TCGGCGCCCCAGATATAGCCTTCCCACGAATAAACAACATAAGCTTTTGACTTTTACCCCCATCATTCCTCCTTTTACTA
GCCTCATCCGGAGTTGAAGCTGGGGCAGGAACAGGTTGAACTGTTTATCCACCTCTCGCTGGAAACCTCGCACACGCAGG
AGCCTCTGTAGACCTGACCATCTTTTCACTTCACCTTGCTGGGGTATCTTCTATTTTAGGTGCCATCAACTTTATTACTA
CCATTATTAATATAAAACCCCCAGCTATTTCGCAATATCAAACACCTTTATTTGTCTGAGCTGTTTTAATTACGGCTGTT
CTCCTTCTCTTATCACTTCCAGTTTTAGCAGCTGGAATTACAATACTTCTAACAGACCGAAACCTTAACACCTCATTCTT
TGACCCAGCAGGAGGGGGGNNNNNNNNNNNNNNNNNNNNNNN
>5298B_5298|Creagrutus.caucanus|COI-5P
ACATGCATTTGTTATAATCTTCTTTATAGTAATACCAGTAATAATCGGGGGCTTCGGAAACTGACTTATCCCTCTAATAA
TCGGCGCCCCAGATATAGCCTTCCCACGAATAAACAACATAAGCTTTTGACTTTTACCCCCATCATTCCTCCTTTTACTA
GCCTCATCCGGAGTTGAAGCTGGGGCAGGAACAGGTTGAACTGTTTATCCACCTCTCGCTGGAAACCTCGCACACGCAGG
AGCCTCTGTAGACCTGACCATCTTTTCACTTCACCTTGCTGGGGTATCTTCTATTTTAGGTGCCATCAACTTTATTACTA
CCATTATTAATATAAAACCCCCAGCTATTTCGCAATATCAAACACCTTTATTTGTCTGAGCTGTTTTAATTACGGCTGTT
CTCCTTCTCTTATCACTTCCAGTTTTAGCAGCTGGAATTACAATACTTCTAACAGACCGAAACCTTAACACCTCATTCTT
TGACCCAGCNNNNNNNNNNNNNNNNNNNNNNNNNNNNNNNNN
>7494_2290|Creagrutus.magdalenae|COI-5P
ACATGCATTTGTTATAATTTTCTTTATAGTAATACCAGTAATAATTGGGGGCTTCGGAAACTGACTTATTCCTCTAATAA
TCGGCGCCCCAGATATGGCCTTTCCACGAATAAACAACATAAGCTTTTGACTCCTGCCCCCATCATTTCTGCTTTTATTA
GCCTCATCCGGGGTTGAAGCTGGGGCAGGGACAGGTTGAACTGTTTATCCCCCACTCGCTGGAAACCTCGCACACGCAGG
AGCCTCTGTAGACCTAACCATCTTTTCACTTCACCTTGCTGGGGTATCTTCTATTTTAGGCGCCATCAACTTTATTACTA
CCATTATTAATATAAAACCCCCAGCTATTTCGCAATATCAAACACCTTTATTTGTCTGAGCTGTTTTAATTACGGCTGTC
CTCCTTCTCTTATCACTTCCGGTTCTAGCAGCTGGAATTACAATGCTTCTAACAGACCGAAACCTTAACACCTCATTCTT
TGACCCAGCAGGAGGGGGAGACCCAATCCTTTATCAACATCT
>8929_4908|Creagrutus.magdalenae|COI-5P
ACATGCATTTGTTATAATTTTCTTTATAGTAATACCAGTAATAATTGGGGGCTTCGGAAACTGACTTATTCCTCTAATAA
TCGGCGCCCCAGATATGGCCTTTCCACGAATAAACAACATAAGCTTTTGACTCCTGCCCCCATCATTTCTGCTTTTATTA
GCCTCATCCGGGGTTGAAGCTGGGGCAGGGACAGGTTGAACTGTTTATCCCCCACTCGCTGGAAACCTCGCACACGCAGG
AGCCTCTGTAGACCTAACCATCTTTTCACTTCACCTTGCTGGGGTATCTTCTATTTTAGGCGCCATCAACTTTATTACTA
CCATTATTAATATAAAACCCCCAGCTATTTCGCAATATCAAACACCTTTATTTGTCTGAGCTGTTTTAATTACGGCTGTC
CTCCTTCTCTTATCACTTCCGGTTCTAGCAGCTGGAATTACAATGCTTCTAACAGACCGAAACCTTAACACCTCATTCTT
TGACCCAGCAGGAGGGGGAGACCCAATCCTTTATCAACATCT
>5307A_5307|Creagrutus.caucanus|COI-5P
ACATGCATTTGTTATAATCTTCTTTATAGTAATACCAGTTATAATTGGGGGGTTCGGAAACTGACTTATCCCTTTAATAA
TTGGCGCCCCAGACATGGCCTTTCCACGAATAAACAACATAAGCTTTTGACTTTTACCCCCATCATTCCTCCTTTTACTA
GCCTCGTCCGGGGTTGAAGCTGGGGCAGGAACAGGTTGAACTGTCTATCCACCACTCGCTGGGAACCTCGCACATGCAGG
AGCCTCTGTAGACCTAACCATCTTTTCACTACACCTTGCTGGGGTATCTTCTATTTTAGGGGCCATCAACTTTATTACTA
CCATTATTAACATAAAACCCCCAGCTATTTCGCAGTATCAAACACCTTTATTTGTCTGAGCTGTTTTAATTACGGCTGTC
CTCCTTCTCTTATCACTTCCAGTTCTAGCAGCTGGAATTACAATACTTCTAACGGACCGAAACCTTAACACCTCATTCTT
TGACCCGGCAGGAGGGGGAGACCCAATCCTTTATCAACANNN
>5321D_5321|Creagrutus.caucanus|COI-5P
ACATGCATTTGTTATAATCTTCTTTATAGTAATACCAGTTATAATTGGGGGGTTCGGAAACTGACTTATCCCTTTAATAA
TTGGCGCCCCAGACATGGCCTTTCCACGAATAAACAACATAAGCTTTTGACTTTTACCCCCATCATTCCTCCTTTTACTA
GCCTCGTCCGGGGTTGAAGCTGGGGCAGGAACAGGTTGAACTGTCTATCCACCACTCGCTGGGAACCTCGCACATGCAGG
AGCCTCTGTAGACCTAACCATCTTTTCACTACACCTTGCTGGGGTATCTTCTATTTTAGGGGCCATCAACTTTATTACTA
CCATTATTAACATAAAACCCCCAGCTATTTCGCAGTATCAAACACCTTTATTTGTCTGAGCTGTTTTAATTACGGCTGTC
CTCCTTCTCTTATCACTTCCAGTTCTAGCAGCTGGAATTACAATACTTCTAACGGACCGAAACCTTAACACCTCATTCTT
TGACCCGGCAGGAGGGGGGGACCCAATCCTTTATCAACATNN
>5434B_5434|Carlastyanax.aurocaudatus|COI-5P
ACATGCATTTGTGATAATTTTCTTTATAGTAATACCAGTAATAATTGGAGGCTTCGGAAACTGACTTGTTCCCCTAATGA
TTGGTGCACCAGACATAGCCTTTCCACGAATAAATAACATAAGTTTCTGACTTTTACCCCCATCATTCCTTCTTCTATTG
GCCTCTTCTGGGGTTGAAGCCGGGGCAGGAACGGGTTGAACTGTTTATCCACCACTAGCTGGTAATCTCGCCCACGCAGG
GGCCTCTGTAGATTTAACTATTTTTTCGCTCCACCTTGCCGGGGTATCTTCTATTTTAGGTGCAATTAACTTTATTACTA
CTATTATTAACATGAAACCACCAGCTATTTCCCAATATCAAACACCTTTATTTGTATGGGCTGTTTTAATTACAGCCGTT
CTTCTCCTACTATCTCTCCCAGTACTAGCAGCAGGAATTACTATGCTTCTAACAGACCGAAACCTTAACACCTCATTCTT
TGATCCAGCAGGGGGAGGAGACCCTATCCTTTATCAACATCT
>5439A_5439|Carlastyanax.aurocaudatus|COI-5P
ACATGCATTTGTGATAATTTTCTTTATAGTAATACCAGTAATAATTGGAGGCTTCGGAAACTGACTTGTTCCCCTAATGA
TTGGTGCACCAGACATAGCCTTTCCACGAATAAATAACATAAGTTTCTGACTTTTACCCCCATCATTCCTTCTTCTATTG
GCCTCTTCTGGGGTTGAAGCCGGGGCAGGAACGGGTTGAACTGTTTATCCACCACTAGCTGGTAATCTCGCCCACGCAGG
GGCCTCTGTAGATTTAACTATTTTTTCGCTCCACCTTGCCGGGGTATCTTCTATTTTAGGTGCAATTAACTTTATTACTA
CTATTATTAACATGAAACCACCAGCTATTTCCCAATATCAAACACCTTTATTTGTATGGGCTGTTTTAATTACAGCCGTT
CTTCTCCTACTATCTCTCCCAGTACTAGCAGCAGGAATTACTATGCTTCTAACAGACCGAAACCTTAACACCTCATTCTT
TGATCCAGCAGGGGGAGGAGACCCTATCCTTTATCAACATCT
>5297D_5297|Psalidodon.fasciatus|COI-5P
ACATGCTTTTGTTATAATTTTCTTCATAGTTATACCCGTTATAATTGGAGGCTTTGGAAATTGACTAATCCCACTTATAA
TTGGTGCCCCAGACATGGCCTTCCCTCGAATAAATAACATAAGTTTTTGACTTCTTCCACCATCTTTCCTTCTCCTTCTG
GCATCCTCTGGGGTTGAAGCCGGGGCAGGGACAGGATGAACTGTATACCCCCCTCTTGCCGGAAATCTTGCACACGCAGG
AGCTTCCGTTGATCTAACAATCTTCTCATTACACTTAGCTGGTGTATCCTCAATTTTAGGGGCAATTAATTTTATTACAA
CTATTATTAATATAAAACCCCCAGCCATCTCACAGTATCAAACACCTTTGTTTGTCTGGGCTGTTTTAGTAACAGCTGTT
CTCCTCCTTCTTTCACTTCCTGTCTTAGCAGCCGGCATCACAATACTCCTTACGGATCGCAACCTTAATACTTCATTCTT
TGACCCGGCAGGAGGTGGAGATCNNNNNNNNNNNNNNNNNNN
>5297E_5297|Psalidodon.fasciatus|COI-5P
ACATGCTTTTGTTATAATTTTCTTCATAGTTATACCCGTTATAATTGGAGGCTTTGGAAATTGACTAATCCCACTTATAA
TTGGTGCCCCAGACATGGCCTTCCCTCGAATAAATAACATAAGTTTTTGACTTCTTCCACCATCTTTCCTTCTCCTTCTA
GCATCCTCTGGGGTTGAAGCCGGGGCAGGGACAGGATGAACTGTATACCCCCCTCTTGCCGGAAATCTTGCACACGCAGG
AGCTTCCGTTGATCTAACAATCTTCTCATTACACTTAGCTGGTGTATCCTCAATTTTAGGGGCAATTAATTTTATTACAA
CTATTATTAATATAAAACCCCCAGCCATCTCACAGTATCAAACACCTTTGTTTGTCTGGGCTGTTTTAGTAACAGCTGTT
CTCCTCCTTCTTTCACTTCCTGTCTTAGCAGCCGGCATCACAATACTCCTTACGGATCGCAACCTTAATACTTCATTCTT
TGACCCGGCAGGAGGTGGAGATCNNNNNNNNNNNNNNNNNNN
>7483_2279|Astyanax.magdalenae|COI-5P
ACATGCTTTTGTTATAATTTTCTTCATAGTTATACCCGTTATAATTGGAGGCTTTGGAAATTGACTAATCCCACTTATAA
TTGGTGCCCCAGACATGGCCTTCCCTCGAATAAATAACATAAGTTTTTGACTTCTTCCACCATCTTTCCTTCTCCTTCTA
GCATCCTCTGGGGTTGAAGCCGGGGCAGGGACAGGATGAACTGTATACCCCCCTCTTGCCGGAAATCTTGCACACGCAGG
AGCTTCCGTTGATCTAACAATCTTCTCATTACACTTAGCTGGTGTATCCTCAATTTTAGGGGCAATTAATTTTATTACAA
CTATTATTAATATAAAACCCCCAGCCATCTCACAGTATCAAACACCTTTGTTTGTCTGGGCTGTTTTAGTAACAGCTGTT
CTCCTCCTTCTTTCACTTCCTGTCTTAGCAGCCGGCATCACAATACTCCTTACGGATCGCAACCTTAATACTTCATTCTT
TGACCCGGCAGGAGGTGGAGATCCCATTCTTTATCAACACNN
>8840_4815|Psalidodon.fasciatus|COI-5P
ACATGCTTTTGTTATAATTTTCTTCATAGTTATACCCGTTATAATTGGAGGCTTTGGAAATTGACTAATCCCACTTATAA
TTGGTGCCCCAGACATGGCCTTCCCTCGAATAAATAACATAAGTTTTTGACTTCTTCCACCATCTTTCCTTCTCCTTCTA
GCATCCTCTGGGGTTGAAGCCGGGGCAGGGACAGGATGAACTGTATACCCCCCTCTTGCCGGAAATCTTGCACACGCAGG
AGCTTCCGTTGATCTAACAATCTTCTCATTACACTTAGCTGGTGTATCCTCAATTTTAGGGGCAATTAATTTTATTACAA
CTATTATTAATATAAAACCCCCAGCCATCTCACAGTATCAAACACCTTTGTTTGTCTGGGCTGTTTTAGTAACAGCTGTT
CTCCTCCTTCTTTCACTTCCTGTCTTAGCAGCCGGCATCACAATACTCCTTACGGATCGCAACCTTAATACTTCATTCTT
TGACCCGGCAGGAGGTGGAGATCCCATTCTTTATCAACACNN
>5297C_5297|Psalidodon.fasciatus|COI-5P
ACATGCTTTTGTTATAATTTTCTTCATAGTTATACCCGTTATAATTGGAGGCTTTGGAAATTGACTAATCCCACTTATAA
TTGGTGCCCCAGACATGGCCTTCCCTCGAATAAATAACATAAGTTTTTGACTTCTTCCACCATCTTTCCTTCTCCTTCTA
GCATCCTCTGGGGTTGAAGCCGGGGCAGGGACAGGATGAACTGTATACCCCCCTCTTGCCGGAAATCTTGCACACGCAGG
AGCTTCCGTTGATCTAACAATCTTCTCATTACACTTAGCTGGTGTATCCTCAATTTTAGGGGCAATTAATTTTATTACAA
CTATTATTAATATAAAACCCCCAGCCATCTCACAGTATCAAACACCTTTGTTTGTCTGGGCTGTTTTAGTAACAGCTGTT
CTCCTCCTTCTTTCACTTCCTGTCTTAGCAGCCGGCATCACAATACTCCTTACGGATCGCAACCTTAATACTTCATTCTT
TGACCCGGCAGGAGGTGGAGATCCCATTCTTTATCAACACCT
>5297A_5297|Psalidodon.fasciatus|COI-5P
ACATGCTTTTGTTATAATTTTCTTCATAGTTATACCCGTTATAATTGGAGGCTTTGGAAATTGACTAATCCCACTTATAA
TTGGTGCCCCAGACATGGCCTTCCCTCGAATAAATAACATAAGTTTTTGACTTCTTCCACCATCTTTCCTTCTCCTTCTA
GCATCCTCTGGGGTTGAAGCCGGGGCAGGGACAGGATGAACTGTATACCCCCCTCTTGCCGGAAATCTTGCACACGCAGG
AGCTTCCGTTGATCTAACAATCTTCTCATTACACTTAGCTGGTGTATCCTCAATTTTAGGGGCAATTAATTTTATTACAA
CTATTATTAATATAAAACCCCCAGCCATCTCACAGTATCAAACACCTTTGTTTGTCTGGGCTGTTTTAGTAACAGCTGTT
CTCCTCCTTCTTTCACTTCCTGTCTTAGCAGCCGGCATCACAATACTCCTTACGGATCGCAACCTTAATACTTCATTCTT
TGACCCGGCAGGAGGTGGAGATCCCATTCTTTATCAACACCT
>5297B_5297|Psalidodon.fasciatus|COI-5P
ACATGCTTTTGTTATAATTTTCTTCATAGTTATACCCGTTATAATTGGAGGCTTTGGAAATTGACTAATCCCACTTATAA
TTGGTGCCCCAGACATGGCCTTCCCTCGAATAAATAACATAAGTTTTTGACTTCTTCCACCATCTTTCCTTCTCCTTCTA
GCATCCTCTGGGGTTGAAGCCGGGGCAGGGACAGGATGAACTGTATACCCCCCTCTTGCCGGAAATCTTGCACACGCAGG
AGCTTCCGTTGATCTAACAATCTTCTCATTACACTTAGCTGGTGTATCCTCAATTTTAGGGGCAATTAATTTTATTACAA
CTATTATTAATATAAAACCCCCAGCCATCTCACAGTATCAAACACCTTTGTTTGTCTGGGCTGTTTTAGTAACAGCTGTT
CTCCTCCTTCTTTCACTTCCTGTCTTAGCAGCCGGCATCACAATACTCCTTACGGATCGCAACCTTAATACTTCATTCTT
TGACCCGGCAGGAGGTGGAGATCCCATTCTTTATCAACACCT
>8209_3656|Psalidodon.fasciatus|COI-5P
ACATGCTTTTGTTATAATTTTCTTCATAGTTATACCCGTTATAATTGGAGGCTTTGGAAATTGACTAATCCCACTTATAA
TTGGTGCCCCAGACATGGCCTTCCCTCGAATAAATAACATAAGTTTTTGACTTCTTCCACCATCTTTCCTTCTCCTTCTA
GCATCCTCTGGGGTTGAAGCCGGGGCAGGGACAGGATGAACTGTATACCCCCCTCTTGCCGGAAATCTTGCACACGCAGG
AGCTTCCGTTGATCTAACAATCTTCTCATTACACTTAGCTGGTGTATCCTCAATTTTAGGGGCAATTAATTTTATTACAA
CTATTATTAATATAAAACCCCCAGCCATCTCACAGTATCAAACACCTTTGTTTGTCTGGGCTGTTTTAGTAACAGCTGTT
CTCCTCCTTCTTTCACTTCCTGTCTTAGCAGCCGGCATCACAATACTCCTAACGGATCGCAACCTTAATACTTCATTCTT
TGACCCGGCAGGAGGTGGAGATCCCATTCTTTATCAACACCT
>5085C_5085|Astyanax.microlepis|COI-5P
ACATGCTTTTGTTATAATTTTCTTCATAGTTATACCCGTTATAATTGGAGGCTTTGGAAATTGACTAATCCCACTTATAA
TTGGTGCCCCAGACATGGCCTTCCCTCGAATAAATAACATAAGTTTTTGACTTCTTCCACCATCTTTCCTTCTCCTTCTA
GCATCCTCTGGGGTTGAAGCCGGGGCAGGGACAGGATGAACCGTATACCCCCCTCTTGCCGGAAATCTTGCACACGCAGG
AGCTTCCGTTGATCTAACAATCTTCTCATTACACTTAGCTGGTGTATCCTCAATTTTAGGGGCAATTAATTTTATTACAA
CTATTATTAATATGAAACCCCCAGCCATCTCACAGTATCAAACACCTTTGTTTGTCTGGGCTGTTTTAGTAACAGCTGTT
CTCCTCCTTCTTTCACTTCCTGTCTTAGCAGCCGGCATCACAATACTCCTTACGGATCGCAACCTTAATACTTCATTCTT
TGACCCCGCAGGAGGTGGAGATCCTATTCTTTATCAACACCT
>8374_3944|Hemibrycon.boquiae|COI-5P
ACATGCTTTCGTTATAATTTTCTTTATAGTTATACCCGTTATAATTGGAGGCTTTGGAAATTGGCTGATCCCACTTATAA
TTGGCGCCCCAGACATAGCCTTCCCTCGAATAAATAACATAAGTTTTTGACTTCTTCCGCCATCTTTTCTTCTCCTTCTA
GCATCCTCTGGAGTTGAAGCTGGGGCAGGGACAGGATGAACCGTATACCCCCCTCTTGCTGGTAATCTTGCACATGCAGG
GGCTTCCGTCGACCTAACTATTTTCTCACTACACTTGGCTGGTGTCTCCTCAATTTTAGGGGCAATCAACTTTATTACAA
CTATTATTAATATAAAACCCCCAGCTATTTCGCAATACCAGACACCCTTGTTTGTCTGGGCTGTTTTAGTGACAGCTGTC
CTCCTCCTTCTTTCACTTCCTGTCTTAGCAGCCGGAATCACGATACTTCTCACAGACCGTAACCTTAATACTTCATTTTT
TGACCCGGCGGGGGGTGGAGATCCTATCCTTTATCAANNNNN
>5085A_5085|Astyanax.microlepis|COI-5P
ACATGCTTTCGTTATAATTTTCTTTATAGTTATACCCGTTATAATTGGAGGCTTTGGAAATTGGCTGATCCCACTTATAA
TTGGCGCCCCAGACATAGCCTTCCCTCGAATAAATAACATAAGTTTTTGACTTCTTCCGCCATCTTTTCTTCTCCTTCTA
GCATCCTCTGGAGTTGAAGCTGGGGCAGGGACAGGATGAACCGTATACCCCCCTCTTGCTGGTAATCTTGCACATGCAGG
GGCTTCCGTCGACCTAACTATTTTCTCACTACACTTGGCTGGTGTCTCCTCAATTTTAGGGGCAATCAACTTTATTACAA
CTATTATTAATATAAAACCCCCAGCTATTTCGCAATACCAGACACCCTTGTTTGTCTGGGCTGTTTTAGTGACAGCTGTC
CTCCTCCTTCTTTCACTTCCTGTCTTAGCAGCCGGAATCACGATACTTCTCACAGACCGTAACCTTAATACTTCATTTTT
TGACCCGGCGGGGGGTGGAGATCCTATCCTTTATCAANNNNN
>5095B_5095|Astyanax.microlepis|COI-5P
ACATGCTTTCGTTATAATTTTCTTTATAGTTATACCCGTTATAATTGGAGGCTTTGGAAATTGGCTGATCCCACTTATAA
TTGGCGCCCCAGACATAGCCTTCCCTCGAATAAATAACATAAGTTTTTGACTTCTTCCGCCATCTTTTCTTCTCCTTCTA
GCATCCTCTGGAGTTGAAGCTGGGGCAGGGACAGGATGAACCGTATACCCCCCTCTTGCTGGTAATCTTGCACATGCAGG
GGCTTCCGTCGACCTAACTATTTTCTCACTACACTTGGCTGGTGTCTCCTCAATTTTAGGGGCAATCAACTTTATTACAA
CTATTATTAATATAAAACCCCCAGCTATTTCGCAATACCAGACACCCTTGTTTGTCTGGGCTGTTTTAGTGACAGCTGTC
CTCCTCCTTCTTTCACTTCCTGTCTTAGCAGCCGGAATCACGATACTTCTCACAGACCGTAACCTTAATACTTCATTTTT
TGACCCGGCGGGGGGTGGAGATCCTATCCTTTATCAACATCT
>8643_4327|Astyanax.sp|COI-5P
ACATGCTTTCGTTATAATTTTTTTTATAGTTATACCCGTTATAATTGGAGGCTTTGGAAATTGGCTAATCCCACTTATAA
TTGGCGCCCCAGACATAGCCTTCCCTCGAATAAATAACATAAGTTTTTGACTTCTTCCACCATCTTTCCTTCTCCTTCTA
GCATCCTCTGGAGTTGAAGCTGGTGCAGGGACAGGATGAACCGTATACCCCCCTCTTGCTGGTAATCTTGCACATGCAGG
GGCTTCCGTCGACCTAACTATTTTCTCACTACACTTAGCTGGTGTCTCCTCAATTTTAGGGGCAATCAATTTTATTACAA
CTATTATTAATATAAAACCCCCAGCTATTTCGCAATACCAGACACCCTTGTTTGTCTGGGCTGTTTTAGTGACAGCTGTC
CTCCTTCTTCTTTCACTCCCTGTATTAGCAGCCGGGATCACGATACTTCTCACAGACCGAAACCTTAATACTTCATTTTT
TGACCCGGCAGGGGGTGGGGATCCTATCCTTTATNNNNNNNN
>8644_4327|Astyanax.sp|COI-5P
ACATGCTTTCGTTATAATTTTTTTTATAGTTATACCCGTTATAATTGGAGGCTTTGGAAATTGGCTAATCCCACTTATAA
TTGGCGCCCCAGACATAGCCTTCCCTCGAATAAATAACATAAGTTTTTGACTTCTTCCACCATCTTTCCTTCTCCTTCTA
GCATCCTCTGGAGTTGAAGCTGGTGCAGGGACAGGATGAACCGTATACCCCCCTCTTGCTGGTAATCTTGCACATGCAGG
GGCTTCCGTCGACCTAACTATTTTCTCACTACACTTAGCTGGTGTCTCCTCAATTTTAGGGGCAATCAATTTTATTACAA
CTATTATTAATATAAAACCCCCAGCTATTTCGCAATACCAGACACCCTTGTTTGTCTGGGCTGTTTTAGTGACAGCTGTC
CTCCTTCTTCTTTCACTCCCTGTATTAGCAGCCGGGATCACGATACTTCTCACAGACCGAAACCTTAATACTTCATTTTT
TGACCCGGCAGGGGGTGGGGATCCTATCCTTTATNNNNNNNN
>8857_4822|Astyanax.magdalenae|COI-5P
ACATGCCTTTGTTATAATCTTCTTCATGGTTATACCTGTCATAATTGGAGGCTTCGGAAACTGGCTTGTTCCACTTATGA
TTGGCGCCCCTGATATAGCCTTTCCCCGAATAAATAATATAAGCTTCTGACTCCTACCCCCCTCACTCCTCCTTCTCTTA
GCATCATCAGGGGTTGAAATAGGAGCGGGTACAGGTTGAACTGTTTACCCCCCACTAGCTGGGAATCTTGCGCACGCGGG
AGCCTCCGTAGACTTAACAATTTTCTCACTTCACCTAGCTGGTGTTTCCTCAATTTTAGGTGCAATTAATTTTATTACAA
CTATTATCAACATGAAGCCTCCAGCTATATCACAGTATCAAACACCCTTATTCGTATGAGCTGTTTTAGTAACAGCTGTC
CTTCTACTCCTCTCCCTCCCGGTCTTAGCAGCTGGAATTACTATACTCCTTACAGACCGAAACCTAAACACCTCATTCTT
CGACCCCGCAGGCGGTGGNNNNNNNNNNNNNNNNNNNNNNNN
>7782_4027|Astyanax.magdalenae|COI-5P
ACATGCCTTTGTTATAATCTTCTTCATGGTTATACCTGTCATAATTGGAGGCTTCGGAAACTGGCTTGTTCCACTTATGA
TTGGCGCCCCTGATATAGCCTTTCCCCGAATAAATAACATAAGCTTCTGACTCCTACCCCCCTCACTCCTCCTTCTCTTA
GCATCATCAGGGGTTGAAATAGGAGCGGGTACAGGTTGAACTGTTTACCCCCCACTAGCTGGGAATCTTGCGCACGCGGG
AGCCTCCGTAGACTTAACAATTTTCTCACTTCACCTAGCTGGTGTTTCCTCAATTTTAGGTGCAATTAATTTTATTACAA
CTATTATCAACATGAAGCCTCCAGCTATATCACAGTATCAAACACCCTTATTCGTATGAGCTGTTTTAGTAACAGCTGTC
CTTCTACTCCTCTCCCTCCCGGTCTTAGCAGCTGGAATTACTATACTCCTTACAGACCGAAACCTAAACACCTCATTCTT
CGACCCCGCAGGCGGTGGAGACCCCATTCTTTACCAACACCT
>8858_4822|Astyanax.magdalenae|COI-5P
ACATGCCTTTGTTATAATCTTCTTCATGGTTATACCTGTCATAATTGGAGGCTTCGGAAACTGGCTTGTTCCACTTATGA
TTGGCGCCCCTGATATAGCCTTTCCCCGAATAAATAACATAAGCTTCTGACTCCTACCCCCCTCACTCCTCCTTCTCTTA
GCATCATCAGGGGTTGAAATAGGAGCGGGTACAGGTTGAACTGTTTACCCCCCACTAGCTGGGAATCTTGCGCACGCGGG
AGCCTCCGTAGACTTAACAATTTTCTCACTTCACCTAGCTGGTGTTTCCTCAATTTTAGGTGCAATTAATTTTATTACAA
CTATTATCAACATGAAGCCTCCAGCTATATCACAGTATCAAACACCCTTATTCGTATGAGCTGTTTTAGTAACAGCTGTC
CTTCTACTCCTCTCCCTCCCGGTCTTAGCAGCTGGAATTACTATACTCCTTACAGACCGAAACCTAAACACCTCATTCTT
CGACCCCGCAGGCGGTGGAGACCCCATTCTTTACCAACACCT
>8199_3653|Astyanax.gisleni|COI-5P
ACATGCCTTTGTTATAATCTTCTTCATGGTTATACCTGTCATAATTGGAGGCTTCGGAAACTGGCTTGTTCCACTTATGA
TTGGCGCCCCTGATATAGCCTTTCCCCGAATAAATAACATAAGCTTCTGACTCCTACCCCCCTCACTCCTCCTTCTCTTA
GCATCATCAGGGGTTGAAATAGGAGCGGGTACAGGTTGAACTGTTTACCCCCCACTAGCTGGGAATCTTGCGCACGCGGG
AGCCTCCGTAGACTTAACAATTTTCTCACTTCACCTAGCTGGTGTTTCCTCAATTTTAGGTGCAATTAATTTTATTACAA
CTATTATCAACATGAAGCCTCCAGCTATATCACAGTATCAAACACCCTTATTCGTATGAGCTGTTTTAGTAACAGCTGTC
CTTCTACTCCTCTCCCTCCCGGTCTTAGCAGCTGGAATTACTATACTCCTTACAGACCGAAACCTAAACACCTCATTCTT
CGACCCCGCAGGCGGTGGAGACCCCATTCTTTACCAACACCT
>6121_6121|Astyanax.magdalenae|COI-5P
ACATGCCTTTGTTATAATCTTCTTCATGGTTATACCTGTCATAATTGGAGGCTTCGGAAACTGGCTTGTTCCACTTATGA
TTGGCGCCCCTGATATAGCCTTTCCCCGAATAAATAACATAAGCTTCTGACTCCTACCCCCCTCACTCCTCCTTCTCTTA
GCATCATCAGGGGTTGAAATAGGAGCGGGTACAGGTTGAACTGTTTACCCCCCACTAGCTGGGAATCTTGCGCACGCGGG
AGCCTCCGTAGACTTAACAATTTTCTCACTTCACCTAGCTGGTGTTTCCTCAATTTTAGGTGCAATTAATTTTATTACAA
CTATTATCAACATGAAGCCTCCAGCTATATCACAGTATCAAACACCCTTATTCGTATGAGCTGTTTTAGTAACAGCTGTC
CTTCTACTCCTCTCCCTCCCGGTCTTAGCAGCTGGAATTACTATACTCCTTACAGACCGAAACCTAAACACCTCATTCTT
CGACCCCGCAGGCGGTGGAGACCCCATTCTTTACCAACACCT
>6461C_6461|Prochilodus.magdalenae|COI-5P
ACATGCTTTCGTAATAATCTTCTTTATAGTAATGCCAATTATGATCGGAGGATTTGGGAACTGATTAGTTCCTCTAATGA
TCGGAGCCCCCGACATAGCATTCCCTCGAATAAATAACATAAGCTTTTGACTACTACCCCCATCTTTCCTTCTCCTTCTG
GCTTCCTCCGGAGTCGAGGCTGGAGCCGGAACAGGTTGAACTGTTTATCCCCCTCTTGCCGGAAATTTAGCCCATGCAGG
AGCCTCTGTAGACTTAACCATTTTCTCACTCCACCTCGCCGGGGTTTCTTCAATTCTGGGGGCAATTAATTTTATTACAA
CCATTATTAACATGAAACCTCCAGCCATTTCTCAATACCAAACACCTTTATTTGTGTGAGCCATCCTAATTACAGCGGTA
CTCCTTCTTCTTTCCCTACCCGNTCTGGCCGCCGGAATTAYAATGCTCTTAACAGACCGAAATCTTAACACCACATTCTT
CSATCCTGCTGGAGGAGGAGANNNNNNNNNNNNNNNNNNNNN
>8139_3498|Prochilodus.magdalenae|COI-5P
ACATGCTTTCGTAATAATCTTCTTTATAGTAATGCCAATTATGATCGGAGGATTTGGGAACTGATTAGTTCCTCTAATGA
TCGGAGCCCCCGACATAGCATTCCCTCGAATAAATAACATAAGCTTTTGACTACTACCCCCATCTTTCCTTCTCCTTCTG
GCTTCCTCCGGAGTCGAGGCTGGAGCCGGAACAGGTNNNNNNNNNNNNNNNNNNNNNNNNNNNNNNNNNNNNNNNNNNNN
NNNNNNNNNNNNNNNNNNNNNNNNNNNNNNNNNNNNNNNNNNNNNNNNNNNNNNNNNNNNNNNNNNNNNNNNNNNNNNNN
NNNNNNNNNNNNNNNNNNNNNNNNNNNNNNNNNNNNNNNNNNNNNNNNNNNNNNNNNNNNNNNNNNNNNNNNNNNNNNNN
NNNNNNNNNNNNNNNNNNNNNNNNNNNNNNNNNNNNNNNNNNNNNNNNNNNNNNNNNNNNNNNNNNNNNNNNNNNNNNNN
NNNNNNNNNNNNNNNNNNNNNNNNNNNNNNNNNNNNNNNNNN
>7602_2623|Prochilodus.magdalenae|COI-5P
ACATGCTTTCGTAATAATCTTCTTTATAGTAATGCCAATTATGATCGGAGGATTTGGGAACTGATTAGTTCCTCTAATGA
TCGGAGCCCCCGACATAGCATTCCCTCGAATAAATAACATAAGCTTTTGACTACTACCCCCATCTTTCCTTCTCCTTCTG
GCTTCCTCCGGAGTCGAGGCTGGAGCCGGAACAGGTTGAACTGTTTATCCCCCTCTTGCCGGAAATTTAGCCCATGCAGG
AGCCTCTGTAGACTTAACCATTTTCTCACTCCACCTCGCCGGGGTTTCTTCAATTCTGGGGGCAATTAATTTTATTACAA
CCATTATTAACATGAAACCTCCAGCCATTTCTCAATACCAAACACCTTTATTTGTGTGAGCCATCCTAATTACAGCGGTA
CTCCTTCTTCTTTCCCTACCCGTTCTGGCCGCCGGAATTACAATGCTCTTGACAGACCGAAATCTTAACACCACATTCTT
CGATCCTGCTGGAGGAGGAGACCCAATCCTTTACCAACACCT
>8138_3498|Prochilodus.magdalenae|COI-5P
ACATGCTTTCGTAATAATCTTCTTTATAGTAATGCCAATTATGATCGGAGGATTTGGGAACTGATTAGTTCCTCTAATGA
TCGGAGCCCCCGACATAGCATTCCCTCGAATAAATAACATAAGCTTTTGACTACTACCCCCATCTTTCCTTCTCCTTCTG
GCTTCCTCCGGAGTCGAGGCTGGAGCCGGAACAGGTTGAACTGTTTATCCCCCTCTTGCCGGAAATTTAGCCCATGCAGG
AGCCTCTGTAGACTTAACCATTTTCTCACTCCACCTCGCCGGGGTTTCTTCAATTCTGGGGGCAATTAATTTTATTACAA
CCATTATTAACATGAAACCTCCAGCCATTTCTCAATACCAAACACCTTTATTTGTGTGAGCCATCCTAATTACAGCGGTA
CTCCTTCTTCTTTCCCTACCCGTTCTGGCCGCCGGAATTACAATGCTCTTAACAGACCGAAATCTTAACACCACATTCTT
CGATCCTGCTGGAGGAGGAGACCCAATCCTTTACCAACACCT
>8141_3498|Prochilodus.magdalenae|COI-5P
ACATGCTTTCGTAATAATCTTCTTTATAGTAATGCCAATTATGATCGGAGGATTTGGGAACTGATTAGTTCCTCTAATGA
TCGGAGCCCCCGACATAGCATTCCCTCGAATAAATAACATAAGCTTTTGACTACTACCCCCATCTTTCCTTCTCCTTCTG
GCTTCCTCCGGAGTCGAGGCTGGAGCCGGAACAGGTTGAACTGTTTATCCCCCTCTTGCCGGAAATTTAGCCCATGCAGG
AGCCTCTGTAGACTTAACCATTTTCTCACTCCACCTCGCCGGGGTTTCTTCAATTCTGGGGGCAATTAATTTTATTACAA
CCATTATTAACATGAAACCTCCAGCCATTTCTCAATACCAAACACCTTTATTTGTGTGAGCCATCCTAATTACAGCGGTA
CTCCTTCTTCTTTCCCTACCCGTTCTGGCCGCCGGAATTACAATGCTCTTAACAGACCGAAATCTTAACACCACATTCTT
CGATCCTGCTGGAGGAGGAGACCCAATCCTTTACCAACACCT
>8218_3664|Prochilodus.magdalenae|COI-5P
ACATGCTTTCGTAATAATCTTCTTTATAGTAATGCCAATTATGATCGGAGGATTTGGGAACTGATTAGTTCCTCTAATGA
TCGGAGCCCCCGACATAGCATTCCCTCGAATAAATAACATAAGCTTTTGACTACTACCCCCATCTTTCCTTCTCCTTCTG
GCTTCCTCCGGAGTCGAGGCTGGAGCCGGAACAGGTTGAACTGTTTATCCCCCTCTTGCCGGAAATTTAGCCCATGCAGG
AGCCTCTGTAGACTTAACCATTTTCTCACTCCACCTCGCCGGGGTTTCTTCAATTCTGGGGGCAATTAATTTTATTACAA
CCATTATTAACATGAAACCTCCAGCCATTTCTCAATACCAAACACCTTTATTTGTGTGAGCCATCCTAATTACAGCGGTA
CTCCTTCTTCTTTCCCTACCCGTTCTGGCCGCCGGAATTACAATGCTCTTAACAGACCGAAATCTTAACACCACATTCTT
CGATCCTGCTGGAGGAGGAGACCCAATCCTTTACCAACACCT
>8214_3664|Prochilodus.magdalenae|COI-5P
ACATGCTTTCGTAATAATCTTCTTTATAGTAATGCCAATTATGATCGGAGGATTTGGGAACTGATTAGTTCCTCTAATGA
TCGGAGCCCCCGACATAGCATTCCCTCGAATAAATAACATAAGCTTTTGACTACTACCCCCATCTTTCCTTCTCCTTCTG
GCTTCCTCCGGAGTCGAGGCTGGAGCCGGAACAGGTTGAACTGTTTATCCCCCTCTTGCCGGAAATTTAGCCCATGCAGG
AGCCTCTGTAGACTTAACCATTTTCTCACTCCACCTCGCCGGGGTTTCTTCAATTCTGGGGGCAATTAATTTTATTACAA
CCATTATTAACATGAAACCTCCAGCCATTTCTCAATACCAAACACCTTTATTTGTGTGAGCCATCCTAATTACAGCGGTA
CTCCTTCTTCTTTCCCTACCCGTTCTGGCCGCCGGAATTACAATGCTCTTAACAGACCGAAATCTTAACACCACATTCTT
CGATCCTGCTGGAGGAGGAGACCCAATCCTTTACCAACACCT
>8217_3664|Prochilodus.magdalenae|COI-5P
ACATGCTTTCGTAATAATCTTCTTTATAGTAATGCCAATTATGATCGGAGGATTTGGGAACTGATTAGTTCCTCTAATGA
TCGGAGCCCCCGACATAGCATTCCCTCGAATAAATAACATAAGCTTTTGACTACTACCCCCATCTTTCCTTCTCCTTCTG
GCTTCCTCCGGAGTCGAGGCTGGAGCCGGAACAGGTTGAACTGTTTATCCCCCTCTTGCCGGAAATTTAGCCCATGCAGG
AGCCTCTGTAGACTTAACCATTTTCTCACTCCACCTCGCCGGGGTTTCTTCAATTCTGGGGGCAATTAATTTTATTACAA
CCATTATTAACATGAAACCTCCAGCCATTTCTCAATACCAAACACCTTTATTTGTGTGAGCCATCCTAATTACAGCGGTA
CTCCTTCTTCTTTCCCTACCCGTTCTGGCCGCCGGAATTACAATGCTCTTAACAGACCGAAATCTTAACACCACATTCTT
CGATCCTGCTGGAGGAGGAGACCCAATCCTTTACCAACACCT
>8185_3499|Prochilodus.magdalenae|COI-5P
ACATGCTTTCGTAATAATCTTCTTTATAGTAATGCCAATTATGATCGGAGGATTTGGGAACTGATTAGTTCCTCTAATGA
TCGGAGCCCCCGACATAGCATTCCCTCGAATAAATAACATAAGCTTTTGACTACTACCCCCATCTTTCCTTCTCCTTCTG
GCTTCCTCCGGAGTCGAGGCTGGAGCCGGAACAGGTTGAACTGTTTATCCCCCTCTTGCCGGAAATTTAGCCCATGCAGG
AGCCTCTGTAGACTTAACCATTTTCTCACTCCACCTCGCCGGGGTTTCTTCAATTCTGGGGGCAATTAATTTTATTACAA
CCATTATTAACATGAAACCTCCAGCCATTTCTCAATACCAAACACCTTTATTTGTGTGAGCCATCCTAATTACAGCGGTA
CTCCTTCTTCTTTCCCTACCCGTTCTGGCCGCCGGAATTACAATGCTCTTAACAGACCGAAATCTTAACACCACATTCTT
CGATCCTGCTGGAGGAGGAGACCCAATCCTTTACCAACACCT
>8181_3499|Prochilodus.magdalenae|COI-5P
ACATGCTTTCGTAATAATCTTCTTTATAGTAATGCCAATTATGATCGGAGGATTTGGGAACTGATTAGTTCCTCTAATGA
TCGGAGCCCCCGACATAGCATTCCCTCGAATAAATAACATAAGCTTTTGACTACTACCCCCATCTTTCCTTCTCCTTCTG
GCTTCCTCCGGAGTCGAGGCTGGAGCCGGAACAGGTTGAACTGTTTATCCCCCTCTTGCCGGAAATTTAGCCCATGCAGG
AGCCTCTGTAGACTTAACCATTTTCTCACTCCACCTCGCCGGGGTTTCTTCAATTCTGGGGGCAATTAATTTTATTACAA
CCATTATTAACATGAAACCTCCAGCCATTTCTCAATACCAAACACCTTTATTTGTGTGAGCCATCCTAATTACAGCGGTA
CTCCTTCTTCTTTCCCTACCCGTTCTGGCCGCCGGAATTACAATGCTCTTAACAGACCGAAATCTTAACACCACATTCTT
CGATCCTGCTGGAGGAGGAGACCCAATCCTTTACCAACACCT
>8163_3498|Prochilodus.magdalenae|COI-5P
ACATGCTTTCGTAATAATCTTCTTTATAGTAATGCCAATTATGATCGGAGGATTTGGGAACTGATTAGTTCCTCTAATGA
TCGGAGCCCCCGACATAGCATTCCCTCGAATAAATAACATAAGCTTTTGACTACTACCCCCATCTTTCCTTCTCCTTCTG
GCTTCCTCCGGAGTCGAGGCTGGAGCCGGAACAGGTTGAACTGTTTATCCCCCTCTTGCCGGAAATTTAGCCCATGCAGG
AGCCTCTGTAGACTTAACCATTTTCTCACTCCACCTCGCCGGGGTTTCTTCAATTCTGGGGGCAATTAATTTTATTACAA
CCATTATTAACATGAAACCTCCAGCCATTTCTCAATACCAAACACCTTTATTTGTGTGAGCCATCCTAATTACAGCGGTA
CTCCTTCTTCTTTCCCTACCCGTTCTGGCCGCCGGAATTACAATGCTCTTAACAGACCGAAATCTTAACACCACATTCTT
CGATCCTGCTGGAGGAGGAGACCCAATCCTTTACCAACACCT
>8133_3498|Prochilodus.magdalenae|COI-5P
ACATGCTTTCGTAATAATCTTCTTTATAGTAATGCCAATTATGATCGGAGGATTTGGGAACTGATTAGTTCCTCTAATGA
TCGGAGCCCCCGACATAGCATTCCCTCGAATAAATAACATAAGCTTTTGACTACTACCCCCATCTTTCCTTCTCCTTCTG
GCTTCCTCCGGAGTCGAGGCTGGAGCCGGAACAGGTTGAACTGTTTATCCCCCTCTTGCCGGAAATTTAGCCCATGCAGG
AGCCTCTGTAGACTTAACCATTTTCTCACTCCACCTCGCCGGGGTTTCTTCAATTCTGGGGGCAATTAATTTTATTACAA
CCATTATTAACATGAAACCTCCAGCCATTTCTCAATACCAAACACCTTTATTTGTGTGAGCCATCCTAATTACAGCGGTA
CTCCTTCTTCTTTCCCTACCCGTTCTGGCCGCCGGAATTACAATGCTCTTGACAGACCGAAATCTTAACACCACATTCTT
CGATCCTGCTGGAGGAGGAGACCCAATCCTTTACCAACACCT
>6567B_6567|Prochilodus.magdalenae|COI-5P
ACATGCTTTCGTAATAATCTTCTTTATAGTAATGCCAATTATGATCGGAGGATTTGGGAACTGATTAGTTCCTCTAATGA
TCGGAGCCCCCGACATAGCATTCCCTCGAATAAATAACATAAGCTTTTGACTACTACCCCCATCTTTCCTTCTCCTTCTG
GCTTCCTCCGGAGTCGAGGCTGGAGCCGGAACAGGTTGAACTGTTTATCCCCCTCTTGCCGGAAATTTAGCCCATGCAGG
AGCCTCTGTAGACTTAACCATTTTCTCACTCCACCTCGCCGGGGTTTCTTCAATTCTGGGGGCAATTAATTTTATTACAA
CCATTATTAACATGAAACCTCCAGCCATTTCTCAATACCAAACACCTTTATTTGTGTGAGCCATCCTAATTACAGCGGTA
CTCCTTCTTCTTTCCCTACCCGTTCTGGCCGCCGGAATTACAATGCTCTTAACAGACCGAAATCTTAACACCACATTCTT
CGATCCTGCTGGAGGAGGAGACCCAATCCTTTACCAACACCT
>6567A_6567|Prochilodus.magdalenae|COI-5P
ACATGCTTTCGTAATAATCTTCTTTATAGTAATGCCAATTATGATCGGAGGATTTGGGAACTGATTAGTTCCTCTAATGA
TCGGAGCCCCCGACATAGCATTCCCTCGAATAAATAACATAAGCTTTTGACTACTACCCCCATCTTTCCTTCTCCTTCTG
GCTTCCTCCGGAGTCGAGGCTGGAGCCGGAACAGGTTGAACTGTTTATCCCCCTCTTGCCGGAAATTTAGCCCATGCAGG
AGCCTCTGTAGACTTAACCATTTTCTCACTCCACCTCGCCGGGGTTTCTTCAATTCTGGGGGCAATTAATTTTATTACAA
CCATTATTAACATGAAACCTCCAGCCATTTCTCAATACCAAACACCTTTATTTGTGTGAGCCATCCTAATTACAGCGGTA
CTCCTTCTTCTTTCCCTACCCGTTCTGGCCGCCGGAATTACAATGCTCTTAACAGACCGAAATCTTAACACCACATTCTT
CGATCCTGCTGGAGGAGGAGACCCAATCCTTTACCAACACCT
>6494D_6494|Prochilodus.magdalenae|COI-5P
ACATGCTTTCGTAATAATCTTCTTTATAGTAATGCCAATTATGATCGGAGGATTTGGGAACTGATTAGTTCCTCTAATGA
TCGGAGCCCCCGACATAGCATTCCCTCGAATAAATAACATAAGCTTTTGACTACTACCCCCATCTTTCCTTCTCCTTCTG
GCTTCCTCCGGAGTCGAGGCTGGAGCCGGAACAGGTTGAACTGTTTATCCCCCTCTTGCCGGAAATTTAGCCCATGCAGG
AGCCTCTGTAGACTTAACCATTTTCTCACTCCACCTCGCCGGGGTTTCTTCAATTCTGGGGGCAATTAATTTTATTACAA
CCATTATTAACATGAAACCTCCAGCCATTTCTCAATACCAAACACCTTTATTTGTGTGAGCCATCCTAATTACAGCGGTA
CTCCTTCTTCTTTCCCTACCCGTTCTGGCCGCCGGAATTACAATGCTCTTAACAGACCGAAATCTTAACACCACATTCTT
CGATCCTGCTGGAGGAGGAGACCCAATCCTTTACCAACACCT
>6461B_6461|Prochilodus.magdalenae|COI-5P
ACATGCTTTCGTAATAATCTTCTTTATAGTAATGCCAATTATGATCGGAGGATTTGGGAACTGATTAGTTCCTCTAATGA
TCGGAGCCCCCGACATAGCATTCCCTCGAATAAATAACATAAGCTTTTGACTACTACCCCCATCTTTCCTTCTCCTTCTG
GCTTCCTCCGGAGTCGAGGCTGGAGCCGGAACAGGTTGAACTGTTTATCCCCCTCTTGCCGGAAATTTAGCCCATGCAGG
AGCCTCTGTAGACTTAACCATTTTCTCACTCCACCTCGCCGGGGTTTCTTCAATTCTGGGGGCAATTAATTTTATTACAA
CCATTATTAACATGAAACCTCCAGCCATTTCTCAATACCAAACACCTTTATTTGTGTGAGCCATCCTAATTACAGCGGTA
CTCCTTCTTCTTTCCCTACCCGTTCTGGCCGCCGGAATTACAATGCTCTTAACAGACCGAAATCTTAACACCACATTCTT
CGATCCTGCTGGAGGAGGAGACCCAATCCTTTACCAACACCT
>6461A_6461|Prochilodus.magdalenae|COI-5P
ACATGCTTTCGTAATAATCTTCTTTATAGTAATGCCAATTATGATCGGAGGATTTGGGAACTGATTAGTTCCTCTAATGA
TCGGAGCCCCCGACATAGCATTCCCTCGAATAAATAACATAAGCTTTTGACTACTACCCCCATCTTTCCTTCTCCTTCTG
GCTTCCTCCGGAGTCGAGGCTGGAGCCGGAACAGGTTGAACTGTTTATCCCCCTCTTGCCGGAAATTTAGCCCATGCAGG
AGCCTCTGTAGACTTAACCATTTTCTCACTCCACCTCGCCGGGGTTTCTTCAATTCTGGGGGCAATTAATTTTATTACAA
CCATTATTAACATGAAACCTCCAGCCATTTCTCAATACCAAACACCTTTATTTGTGTGAGCCATCCTAATTACAGCGGTA
CTCCTTCTTCTTTCCCTACCCGTTCTGGCCGCCGGAATTACAATGCTCTTAACAGACCGAAATCTTAACACCACATTCTT
CGATCCTGCTGGAGGAGGAGACCCAATCCTTTACCAACACCT
>6407B_6407|Prochilodus.magdalenae|COI-5P
ACATGCTTTCGTAATAATCTTCTTTATAGTAATGCCAATTATGATCGGAGGATTTGGGAACTGATTAGTTCCTCTAATGA
TCGGAGCCCCCGACATAGCATTCCCTCGAATAAATAACATAAGCTTTTGACTACTACCCCCATCTTTCCTTCTCCTTCTG
GCTTCCTCCGGAGTCGAGGCTGGAGCCGGAACAGGTTGAACTGTTTATCCCCCTCTTGCCGGAAATTTAGCCCATGCAGG
AGCCTCTGTAGACTTAACCATTTTCTCACTCCACCTCGCCGGGGTTTCTTCAATTCTGGGGGCAATTAATTTTATTACAA
CCATTATTAACATGAAACCTCCAGCCATTTCTCAATACCAAACACCTTTATTTGTGTGAGCCATCCTAATTACAGCGGTA
CTCCTTCTTCTTTCCCTACCCGTTCTGGCCGCCGGAATTACAATGCTCTTAACAGACCGAAATCTTAACACCACATTCTT
CGATCCTGCTGGAGGAGGAGACCCAATCCTTTACCAACACCT
>6392B_6392|Prochilodus.magdalenae|COI-5P
ACATGCTTTCGTAATAATCTTCTTTATAGTAATGCCAATTATGATCGGAGGATTTGGGAACTGATTAGTTCCTCTAATGA
TCGGAGCCCCCGACATAGCATTCCCTCGAATAAATAACATAAGCTTTTGACTACTACCCCCATCTTTCCTTCTCCTTCTG
GCTTCCTCCGGAGTCGAGGCTGGAGCCGGAACAGGTTGAACTGTTTATCCCCCTCTTGCCGGAAATTTAGCCCATGCAGG
AGCCTCTGTAGACTTAACCATTTTCTCACTCCACCTCGCCGGGGTTTCTTCAATTCTGGGGGCAATTAATTTTATTACAA
CCATTATTAACATGAAACCTCCAGCCATTTCTCAATACCAAACACCTTTATTTGTGTGAGCCATCCTAATTACAGCGGTA
CTCCTTCTTCTTTCCCTACCCGTTCTGGCCGCCGGAATTACAATGCTCTTAACAGACCGAAATCTTAACACCACATTCTT
CGATCCTGCTGGAGGAGGAGACCCAATCCTTTACCAACACCT
>6407A_6407|Prochilodus.magdalenae|COI-5P
ACATGCTTTCGTAATAATCTTCTTTATAGTAATGCCAATTATGATCGGAGGATTTGGGAACTGATTAGTTCCTCTAATGA
TCGGAGCCCCCGACATAGCATTCCCTCGAATAAATAACATAAGCTTTTGACTACTACCCCCATCTTTCCTTCTCCTTCTG
GCTTCCTCCGGAGTCGAGGCTGGAGCCGGAACAGGTTGAACTGTTTATCCCCCTCTTGCCGGAAATTTAGCCCATGCAGG
AGCCTCTGTAGACTTAACCATTTTCTCACTCCACCTCGCCGGGGTTTCTTCAATTCTGGGGGCAATTAATTTTATTACAA
CCATTATTAACATGAAACCTCCAGCCATTTCTCAATACCAAACACCTTTATTTGTGTGAGCCATCCTAATTACAGCGGTA
CTCCTTCTTCTTTCCCTACCCGTTCTGGCCGCCGGAATTACAATGCTCTTAACAGACCGAAATCTTAACACCACATTCTT
CGATCCTGCTGGAGGAGGAGACCCAATCCTTTACCAACACCT
>6494E_6494|Prochilodus.magdalenae|COI-5P
ACATGCTTTCGTAATAATCTTCTTTATAGTAATGCCAATTATGATCGGAGGATTTGGGAACTGATTAGTTCCTCTAATGA
TCGGAGCCCCCGACATAGCATTCCCTCGAATAAATAACATAAGCTTTTGACTACTACCCCCATCTTTCCTTCTCCTTCTG
GCTTCCTCCGGAGTCGAGGCTGGAGCCGGAACAGGTTGAACTGTTTATCCCCCTCTTGCCGGAAATTTAGCCCATGCAGG
AGCCTCTGTAGACTTAACCATTTTCTCACTCCACCTCGCCGGGGTTTCTTCAATTCTGGGAGCAATTAATTTTATTACAA
CCATTATTAACATGAAACCTCCAGCCATTTCTCAATACCAAACACCTTTATTTGTGTGAGCCATCCTAATTACAGCGGTA
CTCCTTCTTCTTTCCCTACCCGTTCTGGCCGCCGGAATTACAATGCTCTTAACAGACCGAAATCTTAACACCACATTCTT
CGATCCTGCTGGAGGAGGAGACCCAATCCTTTACCAACACCT
>5120B_5120|Prochilodus.magdalenae|COI-5P
ACATGCTTTCGTAATAATCTTCTTTATAGTAATGCCAATTATGATCGGAGGATTTGGGAACTGATTAGTTCCTCTAATGA
TCGGAGCCCCCGACATAGCATTCCCTCGAATAAATAACATAAGCTTTTGACTACTACCCCCATCTTTCCTTCTCCTTCTG
GCTTCCTCCGGAGTCGAGGCTGGAGCCGGAACAGGTTGAACTGTTTATCCCCCTCTTGCCGGAAATTTAGCCCATGCAGG
AGCCTCTGTAGACTTAACCATTTTCTCACTCCACCTCGCCGGGGTTTCTTCAATTCTGGGGGCAATTAATTTTATTACAA
CCATTATTAACATGAAACCTCCAGCCATTTCTCAATACCAAACACCTTTATTTGTGTGAGCCATCCTAATTACAGCGGTA
CTCCTTCTTCTTTCCCTACCCGTTCTGGCCGCCGGAATTACAATGCTCTTGACAGACCGAAATCTTAACACCACATTCTT
CGATCCTGCTGGAGGAGGAGACCCAATCCTTTACCAACACCT
>5120A_5120|Prochilodus.magdalenae|COI-5P
ACATGCTTTCGTAATAATCTTCTTTATAGTAATGCCAATTATGATCGGAGGATTTGGGAACTGATTAGTTCCTCTAATGA
TCGGAGCCCCCGACATAGCATTCCCTCGAATAAATAACATAAGCTTTTGACTACTACCCCCATCTTTCCTTCTCCTTCTG
GCTTCCTCCGGAGTCGAGGCTGGAGCCGGAACAGGTTGAACTGTTTATCCCCCTCTTGCCGGAAATTTAGCCCATGCAGG
AGCCTCTGTAGACTTAACCATTTTCTCACTCCACCTCGCCGGGGTTTCTTCAATTCTGGGGGCAATTAATTTTATTACAA
CCATTATTAACATGAAACCTCCAGCCATTTCTCAATACCAAACACCTTTATTTGTGTGAGCCATCCTAATTACAGCGGTA
CTCCTTCTTCTTTCCCTACCCGTTCTGGCCGCCGGAATTACAATGCTCTTGACAGACCGAAATCTTAACACCACATTCTT
CGATCCTGCTGGAGGAGGAGACCCAATCCTTTACCAACACCT
>8591_4272|Prochilodus.magdalenae|COI-5P
ACATGCTTTCGTAATAATCTTCTTTATAGTAATGCCAATTATGATCGGAGGATTTGGGAACTGATTAGTTCCTCTAATGA
TCGGAGCCCCCGACATAGCATTCCCTCGAATAAATAACATAAGCTTTTGACTACTACCCCCATCTTTCCTTCTCCTTCTG
GCTTCCTCCGGAGTCGAGGCTGGAGCCGGAACAGGTTGAACTGTTTATCCCCCTCTTGCCGGAAATTTAGCCCATGCAGG
AGCCTCTGTAGACTTAACCATTTTCTCACTCCACCTCGCCGGGGTTTCTTCAATTCTGGGGGCAATTAATTTTATTACAA
CCATTATTAACATGAAACCTCCAGCCATTTCTCAATACCAAACACCTTTATTTGTGTGAGCCATCCTAATTACAGCGGTA
CTCCTTCTTCTTTCCCTACCCGTTCTGGCCGCCGGAATTACAATGCTCTTAACAGACCGAAATCTTAACACCACGTTCTT
CGATCCTGCTGGAGGAGGAGACCCAATCCTTTACCAACACCT
>8880_4855|Prochilodus.magdalenae|COI-5P
ACATGCTTTCGTAATAATCTTCTTTATAGTAATGCCAATTATGATCGGAGGATTTGGGAACTGATTAGTTCCTCTAATGA
TCGGAGCCCCCGACATAGCATTCCCTCGAATAAATAACATAAGCTTTTGACTACTACCCCCATCTTTCCTTCTCCTTCTG
GCTTCCTCCGGAGTCGAGGCTGGAGCCGGAACAGGTTGAACTGTTTATCCCCCTCTTGCCGGAAATTTAGCCCATGCAGG
AGCCTCTGTAGACTTAACCATTTTCTCACTCCACCTCGCCGGGGTTTCTTCAATTCTGGGGGCAATTAATTTTATTACAA
CCATTATTAACATGAAACCTCCAGCCATTTCTCAATACCAAACACCTTTATTTGTGTGAGCCATCCTAATTACAGCGGTA
CTCCTTCTTCTTTCCCTACCCGTTCTGGCCGCCGGAATTACAATGCTCTTAACAGACCGAAATCTTAACACCACATTCTT
CGATCCTGCTGGAGGAGGAGACCCAATCCTTTACCAACACCT
>5120C_5120|Prochilodus.magdalenae|COI-5P
ACATGCTTTCGTAATAATCTTCTTTATAGTAATGCCAATTATGATCGGAGGATTTGGGAACTGATTAGTTCCTCTAATGA
TCGGAGCCCCCGACATAGCATTCCCTCGAATAAATAACATAAGCTTTTGACTACTACCCCCATCTTTCCTTCTCCTTCTG
GCTTCCTCCGGAGTCGAGGCTGGAGCCGGAACAGGTTGAACTGTTTATCCCCCTCTTGCCGGAAATTTAGCCCATGCAGG
AGCCTCTGTAGACTTAACCATTTTCTCACTCCACCTCGCCGGGGTTTCTTCAATTCTGGGGGCAATTAATTTTATTACAA
CCATTATTAACATGAAACCTCCAGCCATTTCTCAATACCAAACACCTTTATTTGTGTGAGCCATCCTAATTACAGCGGTA
CTCCTTCTTCTTTCCCTACCCGTTCTGGCCGCCGGAATTACAATGCTCTTAACAGACCGAAATCTTAACACCACATTCTT
CGATCCTGCTGGAGGAGGAGACCCAATCCTTTACCAACACCT
>8860_4820|Prochilodus.magdalenae|COI-5P
ACATGCTTTCGTAATAATCTTCTTTATAGTAATGCCAATTATGATCGGAGGATTTGGGAACTGATTAGTTCCTCTAATGA
TCGGAGCCCCCGACATAGCATTCCCTCGAATAAATAACATAAGCTTTTGACTACTACCCCCATCTTTCCTTCTCCTTCTG
GCTTCCTCCGGAGTCGAGGCTGGAGCCGGAACAGGTTGAACTGTTTATCCCCCTCTTGCCGGAAATTTAGCCCATGCAGG
AGCCTCTGTAGACTTAACCATTTTCTCACTCCACCTCGCCGGGGTTTCTTCAATTCTGGGGGCAATTAATTTTATTACAA
CCATTATTAACATGAAACCTCCAGCCATTTCTCAATACCAAACACCTTTATTTGTGTGAGCCATCCTAATTACAGCGGTA
CTCCTTCTTCTTTCCCTACCCGTTCTGGCCGCCGGAATTACAATGCTCTTAACAGACCGAAATCTTAACACCACATTCTT
CGATCCTGCTGGAGGAGGAGACCCAATCCTTTACCAACACCT
>5136B_5136|Prochilodus.magdalenae|COI-5P
ACATGCTTTCGTAATAATCTTCTTTATAGTAATGCCAATTATGATCGGAGGATTTGGGAACTGATTAGTTCCTCTAATGA
TCGGGGCCCCCGACATAGCATTCCCTCGAATAAATAACATAAGCTTTTGACTACTACCCCCATCTTTCCTTCTCCTTCTG
GCTTCCTCCGGAGTCGAGGCTGGAGCCGGAACAGGTTGAACTGTTTATCCCCCTCTTGCCGGAAATTTAGCCCATGCAGG
AGCCTCTGTAGACTTAACCATTTTCTCACTCCACCTCGCCGGGGTTTCTTCAATTCTGGGGGCAATTAATTTTATTACAA
CCATTATTAACATGAAACCTCCAGCCATTTCTCAATACCAAACACCTTTATTTGTGTGAGCCATCCTAATTACAGCGGTA
CTCCTTCTTCTTTCCCTACCCGTTCTGGCCGCCGGAATTACAATGCTCTTAACAGACCGAAATCTTAACACCACATTCTT
CGATCCTGCTGGAGGAGGAGACCCAATCCTTTACCAACACCT
>5942G_5942|Gilbertolus.alatus|COI-5P
ACATGCCTTTGTAATAATTTTCTTTATAGTAATGCCAATTATGATTGGAGGATTTGGGAACTGATTAGTCCCTCTAATGA
TCGGAGCCCCCGACATAGCATTTCCTCGAATAAATAACATAAGCTTCTGACTACTACCCCCCTCTTTTCTTCTCCTACTG
GCTTCCTCCGGAGTCGAGGCTGGAGCCGGAACAGGTTGAACTGTTTATCCCCCTCTTGCCGGAAACTTAGCCCACGCAGG
AGCCTCTGTAGACTTAACCATTTTTTCACTCCACCTGGCCGGGGTTTCCTCAATTCTGGGGGCAATTAATTTTATTACAA
CCATTATTAATATAAAACCCCCAGCAATTTCACAGTATCAAACCCCTTTATTTGTATGAGCCATCCTAATTACAGCGGTC
CTTCTTCTTCTTTCCCTACCAGTTCTGGCTGCCGGAATTACCATGCTATTAACAGACCGAAATATTAACACTACATTCTT
TGACCCTGCAGGAGGAGGTGACCCAATCCTTTATCAACACCT
>7780_4025|Megaleporinus.muyscorum|COI-5P
ACATGCATTTGTAATAATTTTCTTTATAGTTATACCAATTATGATTGGGGGCTTTGGAAACTGGTTAGTACCACTAATAA
TCGGCGCACCCGACATAGCATTTCCACGAATAAATAACATAAGCTTCTGACTACTACCCCCTTCTTTTCTTCTTCTACTA
GCCTCTTCCGGAGTAGAGGCCGGAGCCGGAACGGGTTGAACTGTTTACCCCCCACTTGCTGGAAACTTAGCACACGCAGG
AGCTTCCGTCGACTTAACCATTTTTTCGCTCCATCTCGCCGGTGTTTCCTCAATTCTTGGGGCTATCAACTTTATTACAA
CTATTATTAATATAAAACCACCAGCCATCTCACAATATCAAACCCCCCTATTTGTCTGGGCCGTCCTAATCACAGCGGTT
CTTCTTCTTCTTTCCCTTCCGGTTCTGGCTGCCGGGATTACAATGCTCCTAACAGACCGAAACCTTAATACCACATTCTT
TGACCCTGCAGGAGGGGGGGACCCTATTTTATATCAACACTT
>8145_3497|Megaleporinus.muyscorum|COI-5P
ACATGCATTTGTAATAATTTTCTTTATAGTTATACCAATTATGATTGGGGGCTTTGGAAACTGGTTAGTACCACTAATAA
TCGGCGCACCCGACATAGCATTTCCACGAATAAATAACATAAGCTTCTGACTACTACCCCCTTCTTTTCTTCTTCTACTA
GCCTCTTCCGGAGTAGAGGCCGGAGCCGGAACGGGTTGAACTGTTTACCCCCCACTTGCTGGAAACTTAGCACACGCAGG
AGCTTCCGTCGACTTAACCATTTTTTCGCTCCATCTCGCCGGTGTTTCCTCAATTCTTGGGGCTATCAACTTTATTACAA
CTATTATTAATATAAAACCACCAGCCATCTCACAATATCAAACCCCCCTATTTGTCTGGGCCGTCCTAATCACAGCGGTT
CTTCTTCTTCTTTCCCTTCCGGTTCTGGCTGCCGGGATTACAATGCTCCTAACAGACCGAAACCTTAATACCACATTCTT
TGACCCTGCAGGAGGGGGGGACCCTATTTTATATCAACACTT
>8582_4271|Megaleporinus.muyscorum|COI-5P
ACATGCATTTGTAATAATTTTCTTTATAGTTATACCAATTATGATTGGGGGCTTTGGAAACTGGTTAGTACCACTAATAA
TCGGCGCACCCGACATAGCATTTCCACGAATAAATAACATAAGCTTCTGACTACTACCCCCTTCTTTTCTTCTTCTACTA
GCCTCTTCCGGAGTAGAGGCCGGAGCCGGAACGGGTTGAACTGTTTACCCCCCACTTGCTGGAAACTTAGCACACGCAGG
AGCTTCCGTCGACTTAACCATTTTTTCGCTCCATCTCGCCGGTGTTTCCTCAATTCTTGGGGCTATCAACTTTATTACAA
CTATTATTAATATAAAACCACCAGCCATCTCACAATATCAAACCCCCCTATTTGTCTGGGCCGTCCTAATCACAGCGGTT
CTTCTTCTTCTTTCCCTTCCGGTTCTGGCTGCCGGGATTACAATGCTCCTAACAGACCGAAACCTTAATACCACATTCTT
TGACCCTGCAGGAGGGGGGGACCCTATTTTATATCAACACTT
>8583_4271|Megaleporinus.muyscorum|COI-5P
ACATGCATTTGTAATAATTTTCTTTATAGTTATACCAATTATGATTGGGGGCTTTGGAAACTGGTTAGTACCACTAATAA
TCGGCGCACCCGACATAGCATTTCCACGAATAAATAACATAAGCTTCTGACTACTACCCCCTTCTTTTCTTCTTCTACTA
GCCTCTTCCGGAGTAGAGGCCGGAGCCGGAACGGGTTGAACTGTTTACCCCCCACTTGCTGGAAACTTAGCACACGCAGG
AGCTTCCGTCGACTTAACCATTTTTTCGCTCCATCTCGCCGGTGTTTCCTCAATTCTTGGGGCTATCAACTTTATTACAA
CTATTATTAATATAAAACCACCAGCCATCTCACAATATCAAACCCCCCTATTTGTCTGGGCCGTCCTAATCACAGCGGTT
CTTCTTCTTCTTTCCCTTCCGGTTCTGGCTGCCGGGATTACAATGCTCCTAACAGACCGAAACCTTAATACCACATTCTT
TGACCCTGCAGGAGGGGGGGACCCTATTTTATATCAACACTT
>8045_3645|Parodon.magdalenensis|COI-5P
ACATGCCTTTGTAATAATTTTCTTTATAGTAATACCGATTATAATTGGAGGCTTTGGAAACTGGTTAATTCCCCTCATGA
TTGGGGCACCAGACATGGCATTTCCCCGAATAAATAACATAAGCTTCTGACTACTTCCACCATCTTTCCTTCTTCTCTTG
GCCTCCTCTGGGGTTGAAGCCGGGGCTGGGACAGGTTGAACTGTCTATCCCCCCCTCGCCGGAAATTTGGCCCATGCAGG
AGCTTCAGTAGACTTAACCATCTTCTCCCTCCACCTCGCTGGGGTTTCCTCTATTCTTGGTGCCATTAATTTTATTACAA
CCATTATTAACATAAAACCCCCAGCCATCTCACAATACCAAACCCCGTTGTTTGTGTGAGCAGTACTAATTACAGCTGTT
CTCCTTCTCCTATCACTGCCTGTCCTGGCTGCCGGAATTACCATGCTTCTAACAGATCGAAACCTTAACACCACATTCTT
TGACCCCGCGGGCGGAGGGGACCCCATCCTTTATCAACACCA
>7672_2954|Parodon.suborbitalis|COI-5P
ACATGCCTTTGTAATAATTTTCTTTATAGTAATACCGATTATAATTGGAGGCTTTGGAAACTGGTTAATTCCCCTCATGA
TTGGGGCACCAGACATGGCATTTCCCCGAATAAATAACATAAGCTTCTGACTACTTCCACCATCTTTCCTTCTTCTCTTG
GCCTCCTCTGGGGTTGAAGCCGGGGCTGGGACAGGTTGAACTGTCTATCCCCCCCTCGCCGGAAATTTGGCCCATGCAGG
AGCTTCAGTAGACTTAACCATCTTCTCCCTCCACCTCGCTGGGGTTTCCTCTATTCTTGGTGCCATTAATTTTATTACAA
CCATTATTAACATAAAACCCCCAGCCATCTCACAATACCAAACCCCGTTGTTTGTGTGAGCAGTACTAATTACAGCTGTT
CTCCTTCTCCTATCACTGCCTGTCCTGGCTGCCGGAATTACCATGCTTCTAACAGATCGAAACCTTAACACCACATTCTT
TGACCCCGCGGGCGGAGGGGACCCCATCCTTTATCAACACCT
>5115_5115|Parodon.magdalenensis|COI-5P
ACATGCCTTTGTAATAATTTTCTTTATAGTAATACCGATTATAATTGGAGGCTTTGGAAACTGGTTAATTCCCCTCATGA
TTGGGGCACCAGACATGGCATTTCCCCGAATAAATAACATAAGCTTCTGACTACTTCCACCATCTTTCCTTCTTCTCTTG
GCCTCCTCTGGGGTTGAAGCCGGGGCTGGGACAGGTTGAACTGTCTATCCCCCCCTCGCCGGAAATTTGGCCCATGCAGG
AGCTTCAGTAGACTTAACCATCTTCTCCCTCCACCTCGCTGGGGTTTCCTCTATTCTTGGTGCCATTAATTTTATTACAA
CCATTATTAACATAAAACCCCCAGCCATCTCACAATACCAAACCCCGTTGTTTGTGTGAGCAGTACTAATTACAGCTGTT
CTCCTTCTCCTATCACTGCCTGTCCTGGCTGCCGGAATTACCATGCTTCTAACAGATCGAAACCTTAACACCACATTCTT
TGACCCCGCGGGCGGAGGGGACCCCATCCTTTATCAACACCT
>7670_2970|Parodon.suborbitalis|COI-5P
ACATGCCTTTGTAATAATTTTCTTTATAGTAATACCGATTATAATTGGAGGCTTTGGAAACTGGTTAATTCCCCTCATGA
TTGGGGCACCAGACATGGCATTTCCCCGAATAAATAACATAAGCTTCTGACTACTTCCACCATCTTTCCTTCTTCTCTTG
GCCTCCTCTGGGGTTGAAGCCGGGGCTGGGACAGGTTGAACTGTCTATCCCCCCCTCGCCGGAAATTTGGCCCATGCAGG
AGCTTCAGTAGACTTAACCATCTTCTCCCTCCACCTCGCTGGGGTTTCCTCTATTCTTGGTGCCATTAATTTTATTACAA
CCATTATTAACATAAAACCCCCAGCCATCTCACAATACCAAACCCCGTTGTTTGTGTGAGCAGTACTAATTACAGCTGTT
CTCCTTCTCCTATCACTGCCTGTCCTGGCTGCCGGAATTACCATGCTTCTAACAGATCGAAACCTTAACACCACATTCTT
TGACCCCGCGGGCGGAGGGGACCCCATCCTTTATCAACACCT
>9019_5056|Parodon.magdalenensis|COI-5P
ACATGCCTTTGTAATAATTTTCTTTATAGTAATACCGATTATAATTGGAGGCTTTGGAAACTGGTTAATTCCCCTCATGA
TTGGGGCACCAGACATGGCATTTCCCCGAATAAATAACATAAGCTTCTGACTACTTCCACCATCTTTCCTTCTTCTCTTG
GCCTCCTCTGGGGTTGAAGCCGGGGCTGGGACAGGTTGAACTGTCTATCCCCCCCTCGCCGGAAATTTGGCCCATGCAGG
[truncated: 58,884 more chars]
